# Supplementary material for: Transcriptional Profiling at High Temporal Resolution Reveals Robust Immune/Inflammatory Responses during Rat Sciatic Nerve Recovery
Source: PubMed Central journal article supplement (PMC5405595; doi:10.1155/2017/3827841), 2017-04-12

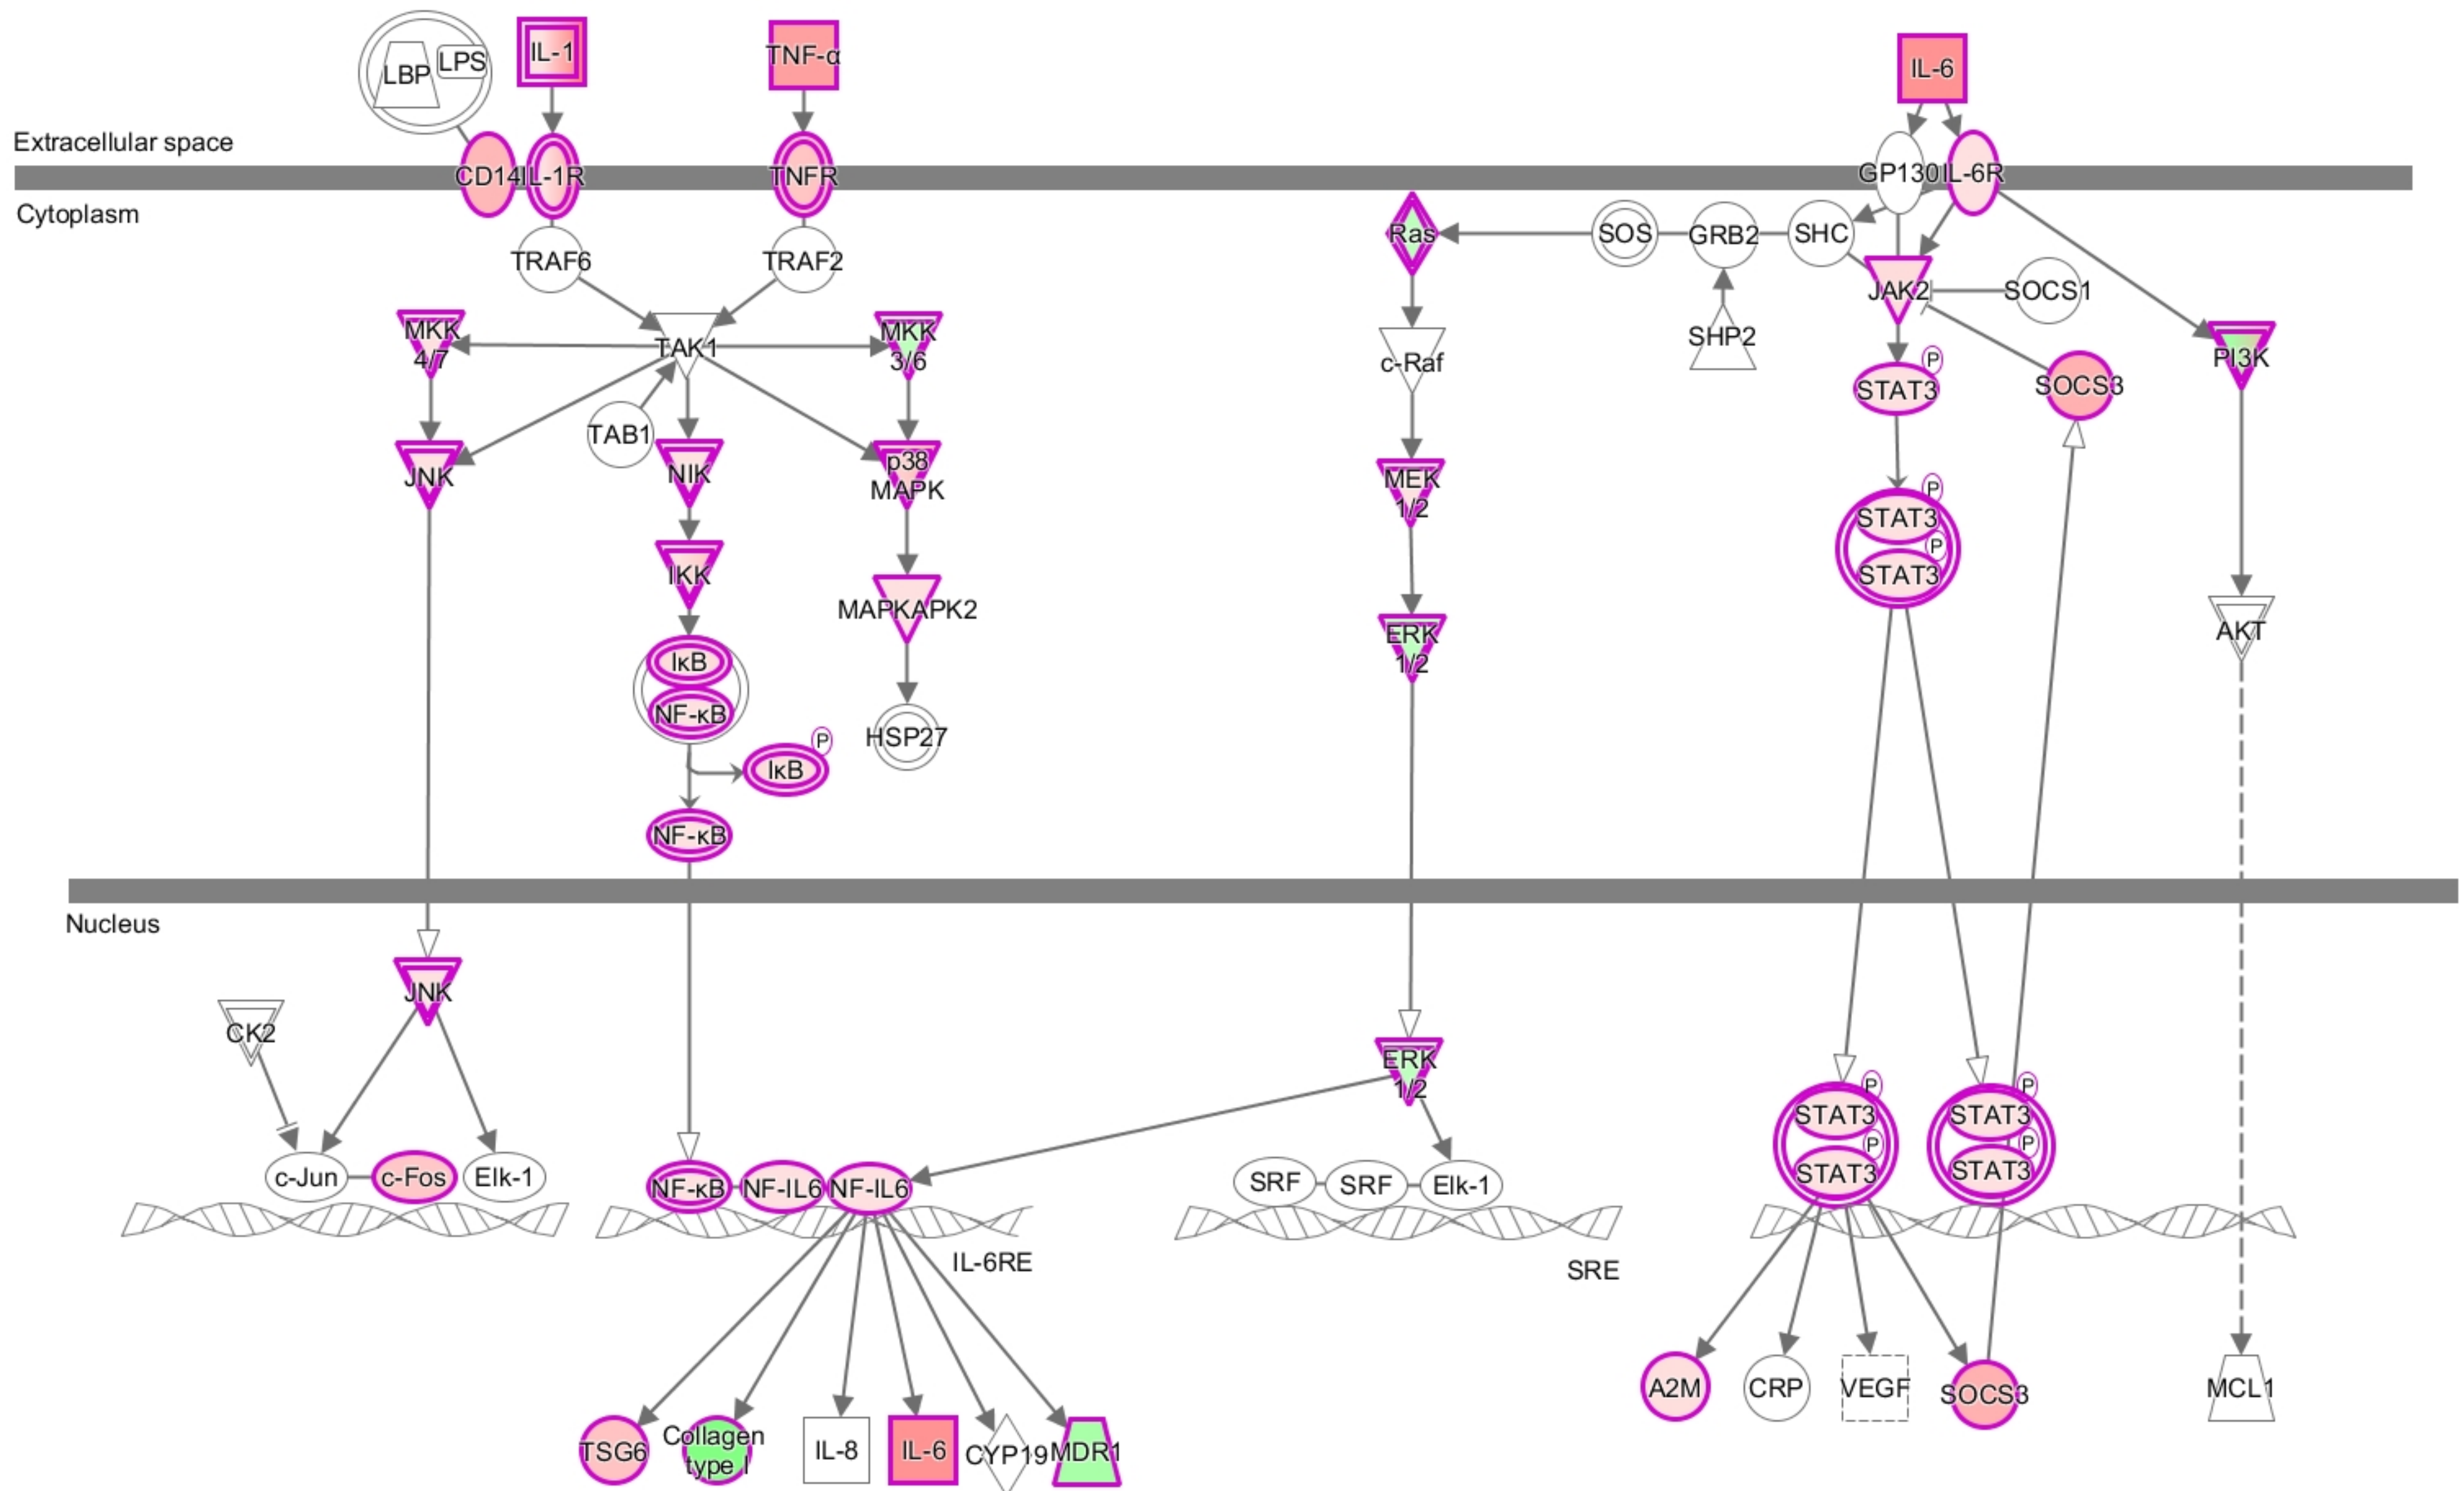

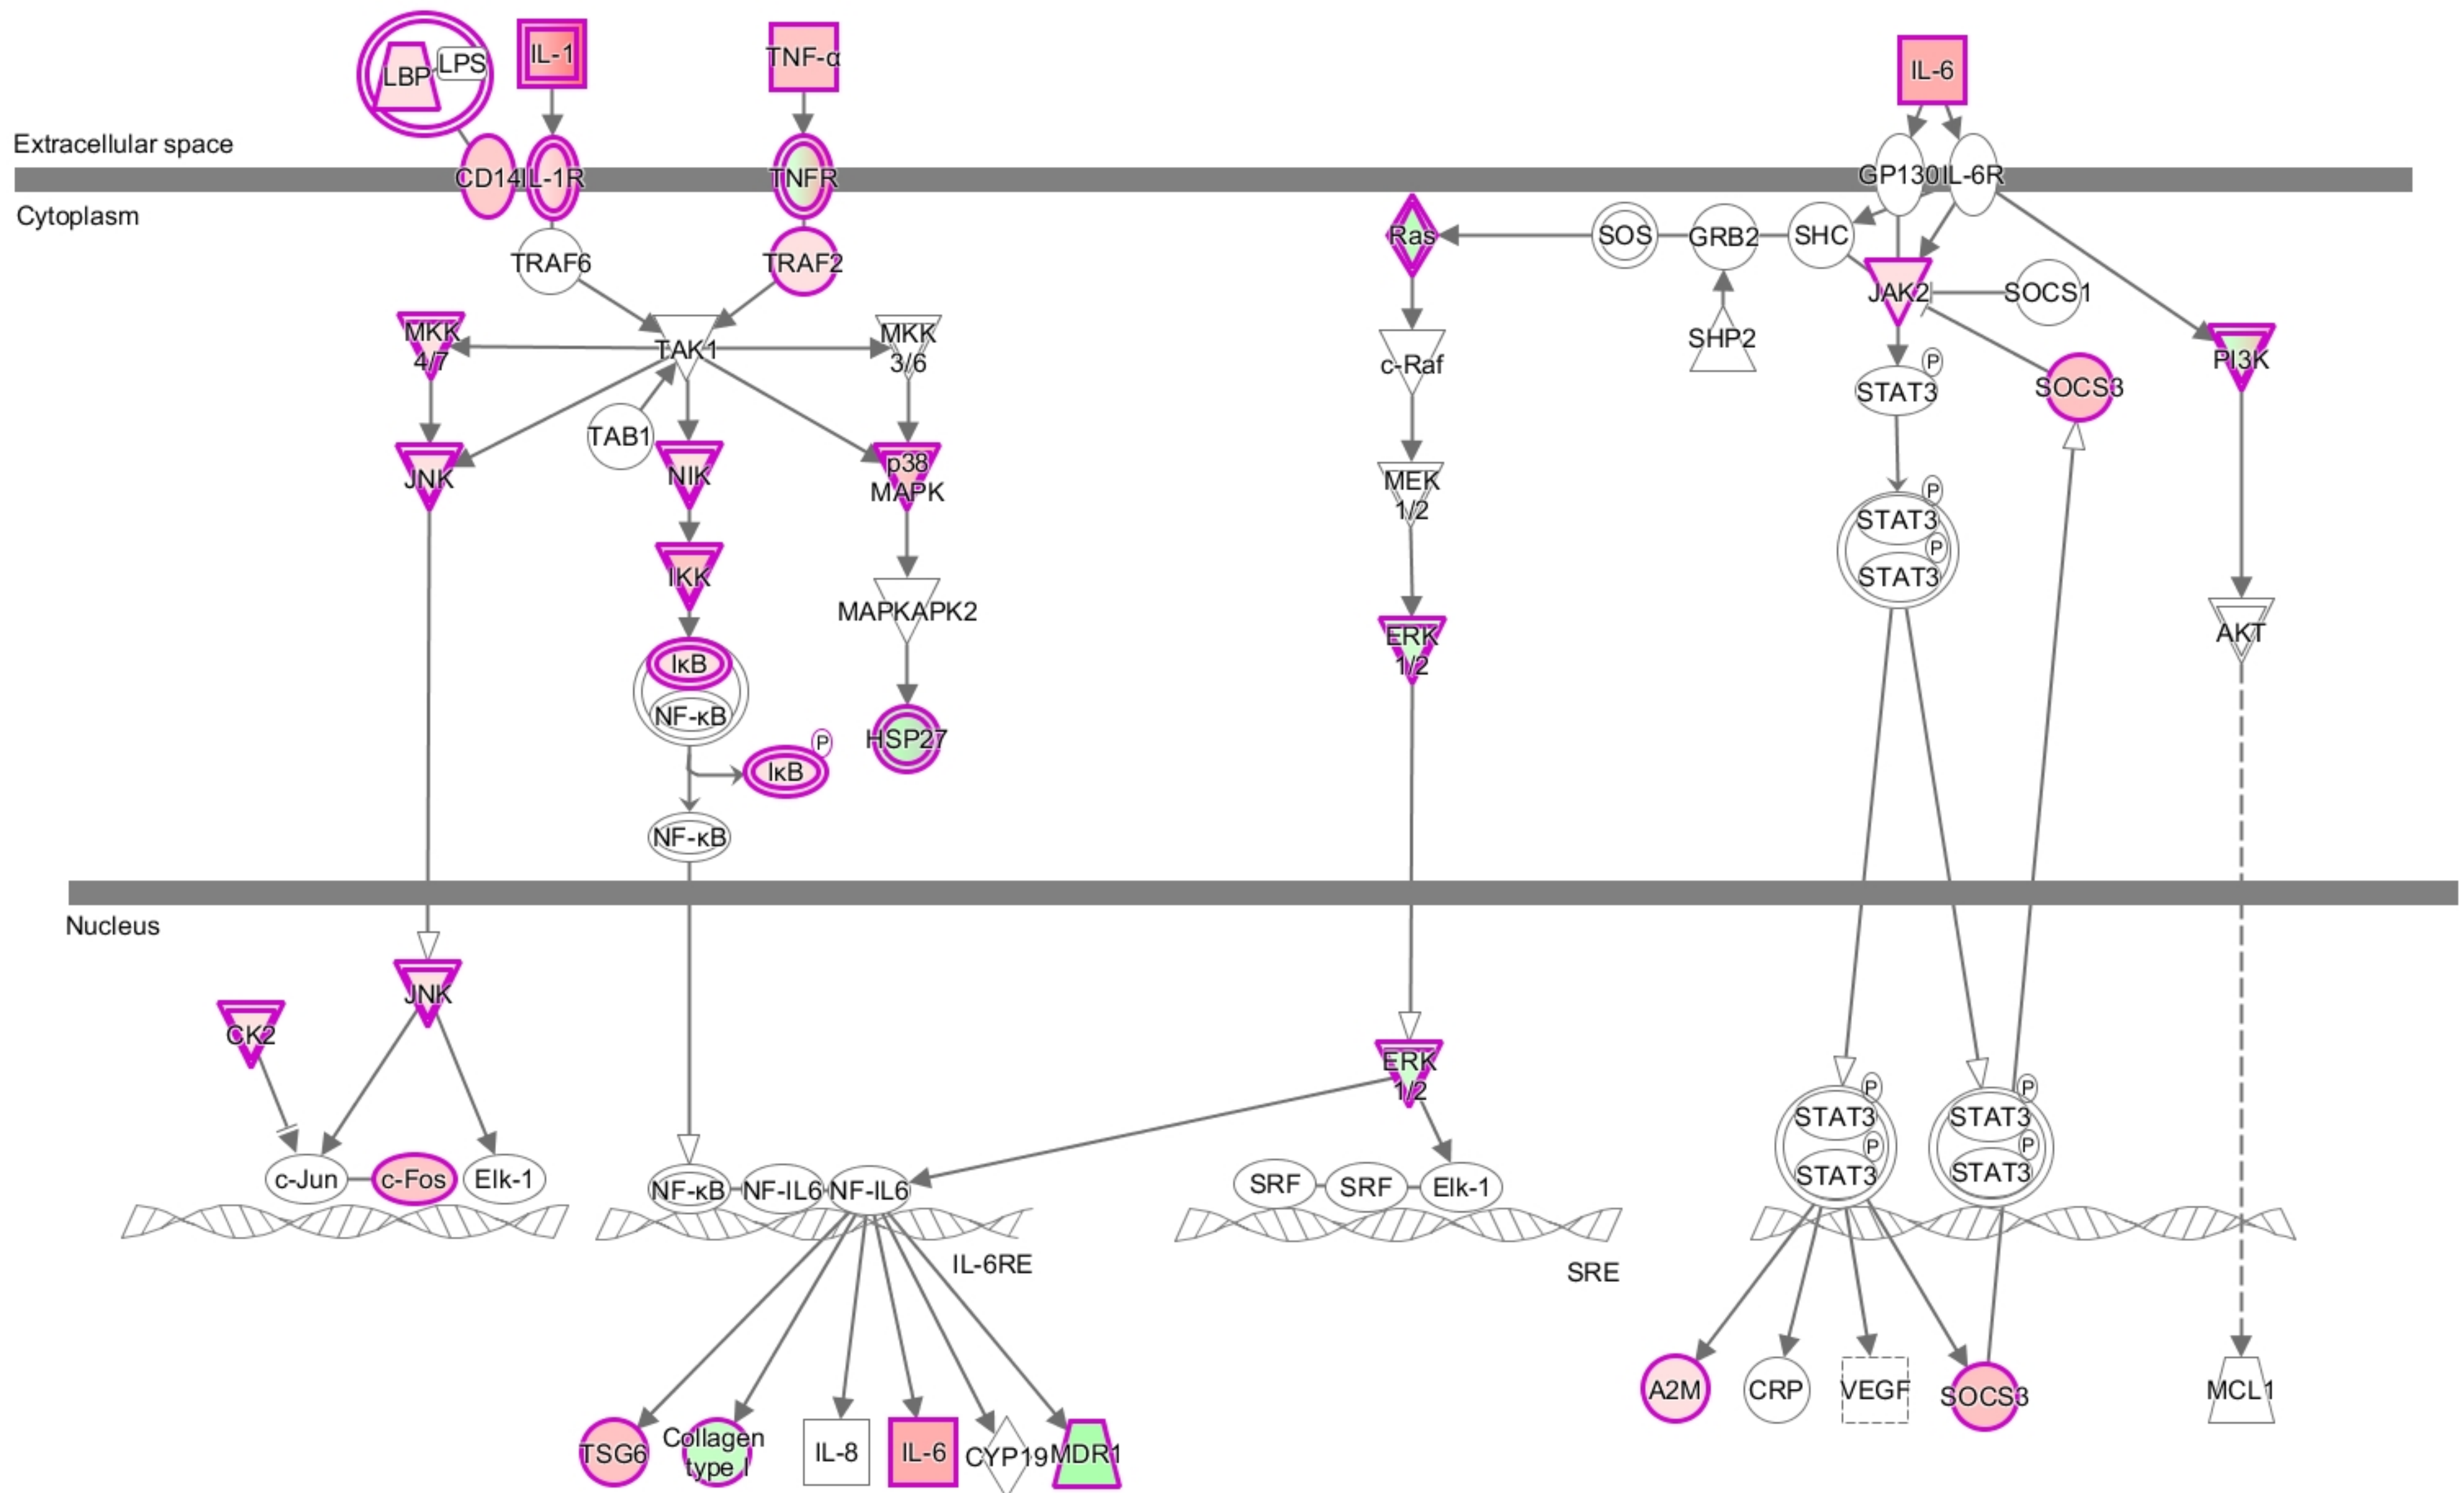



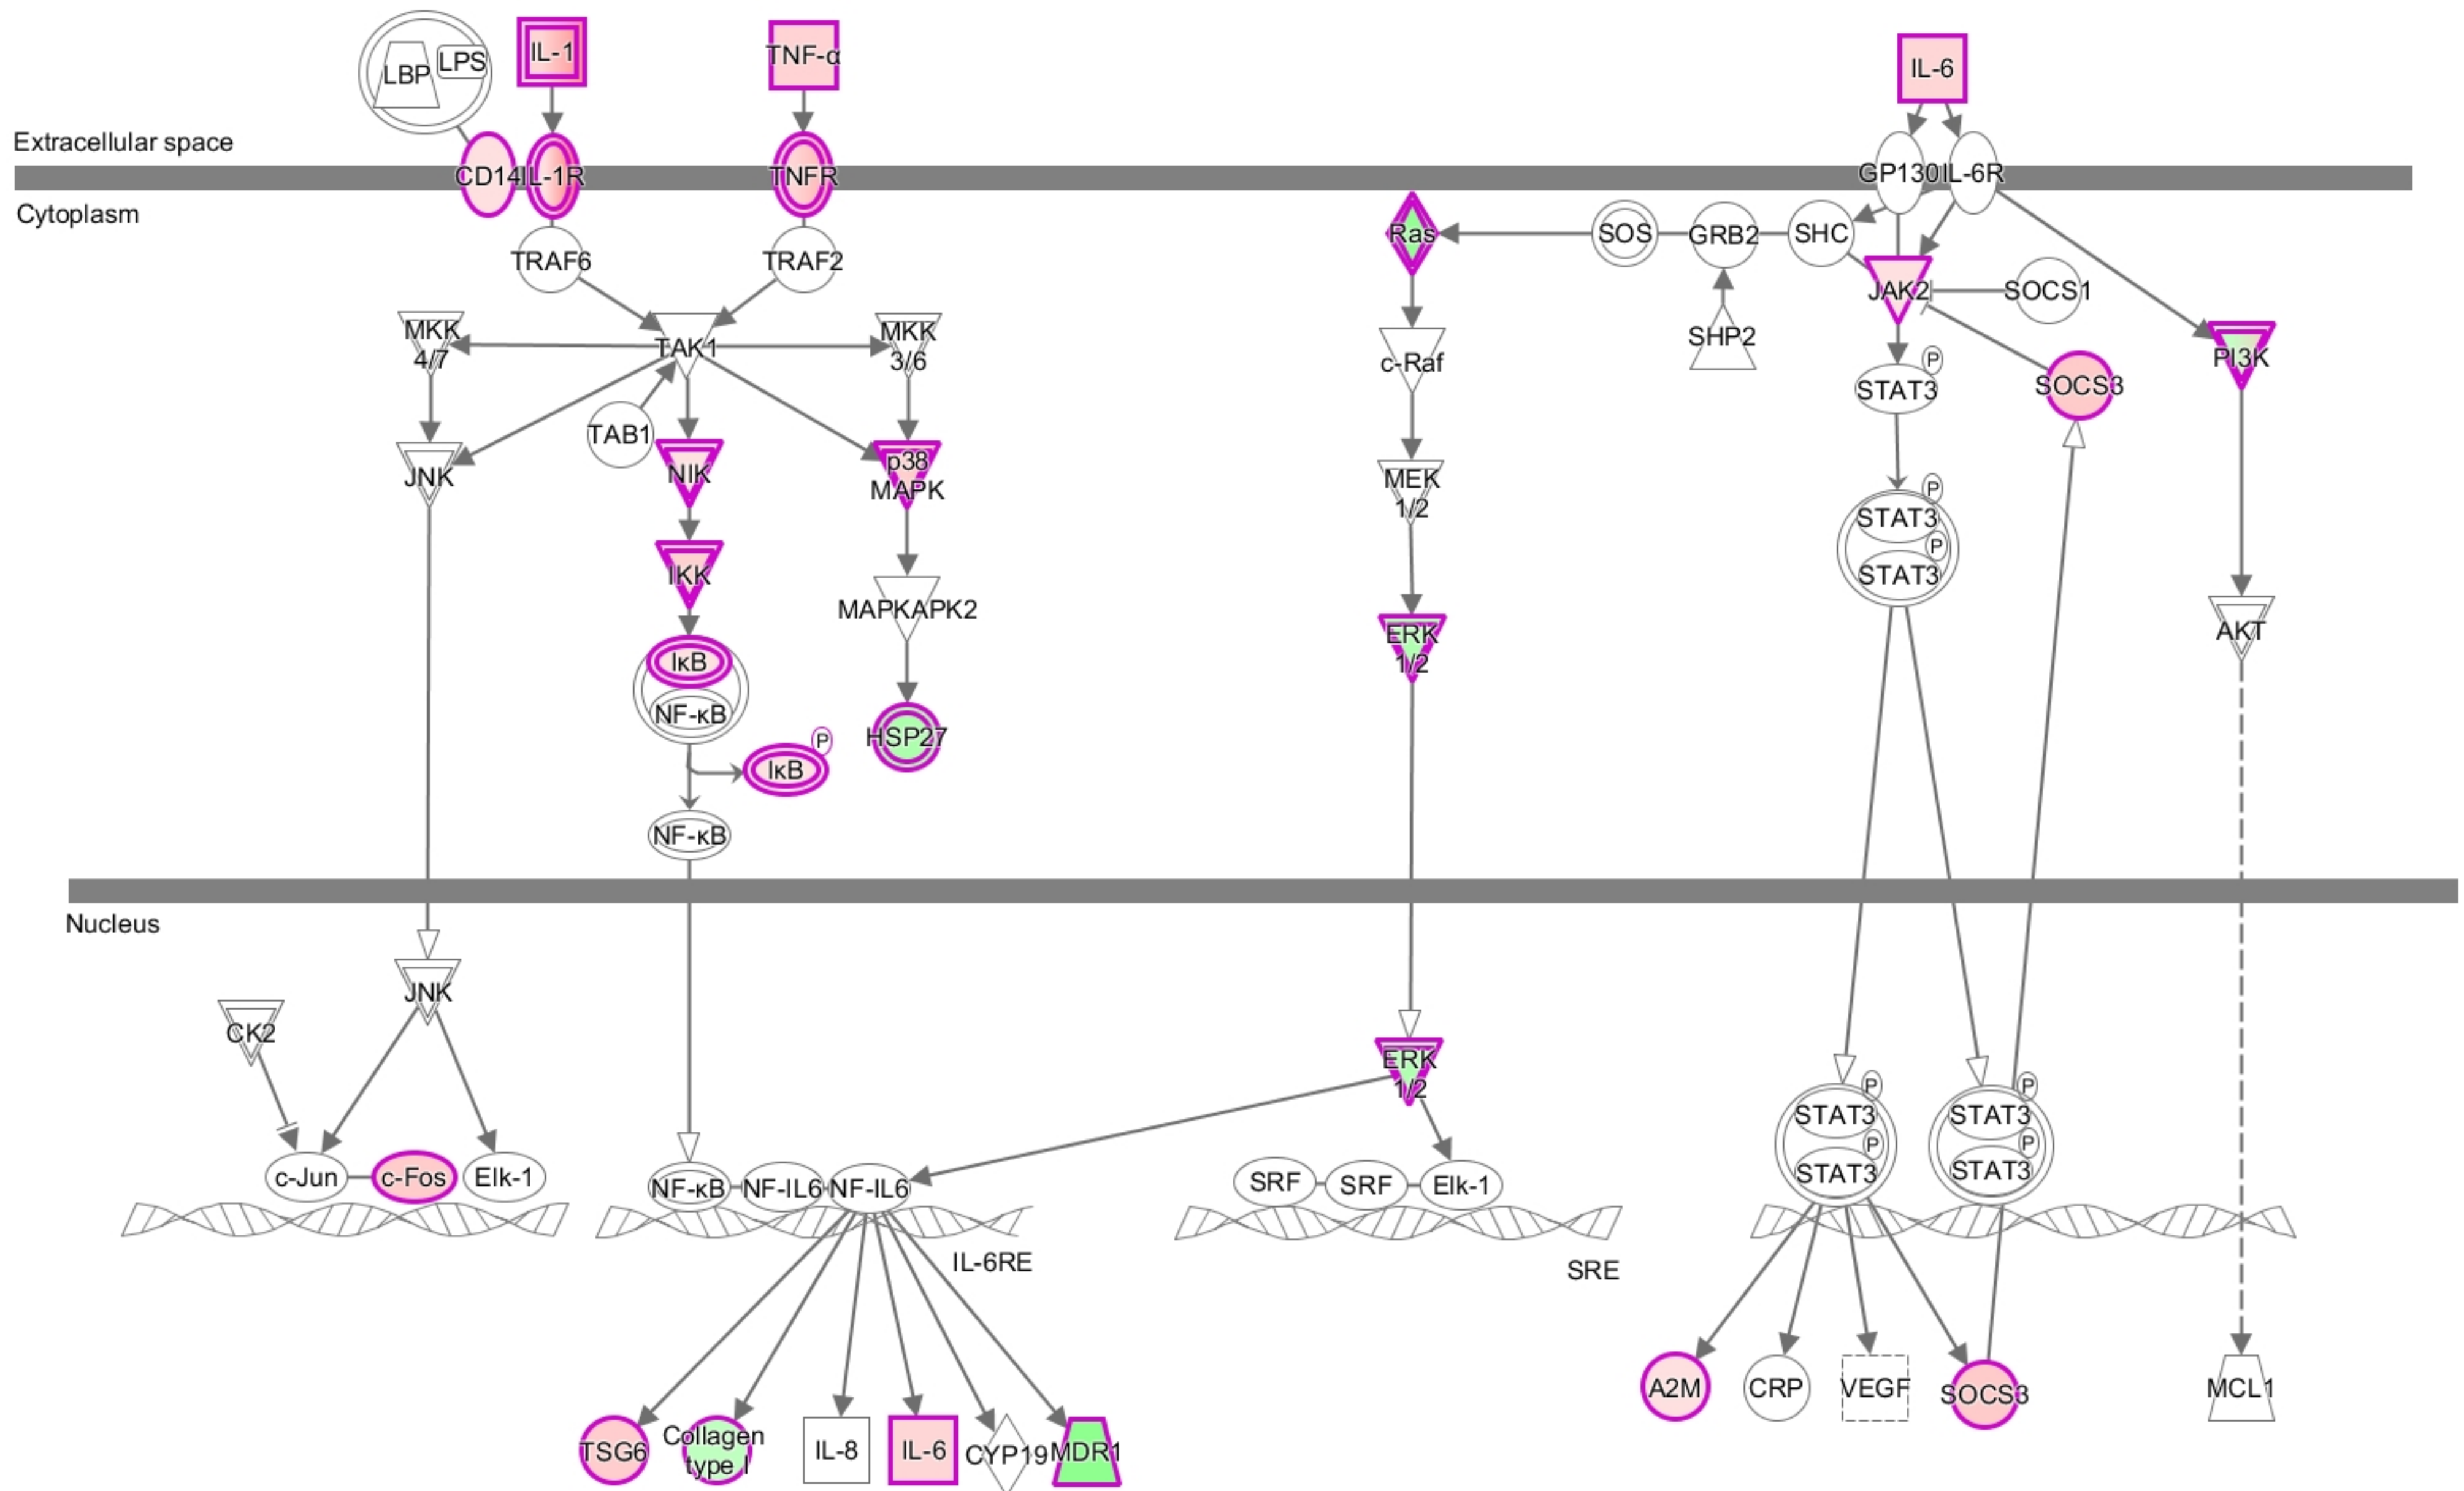

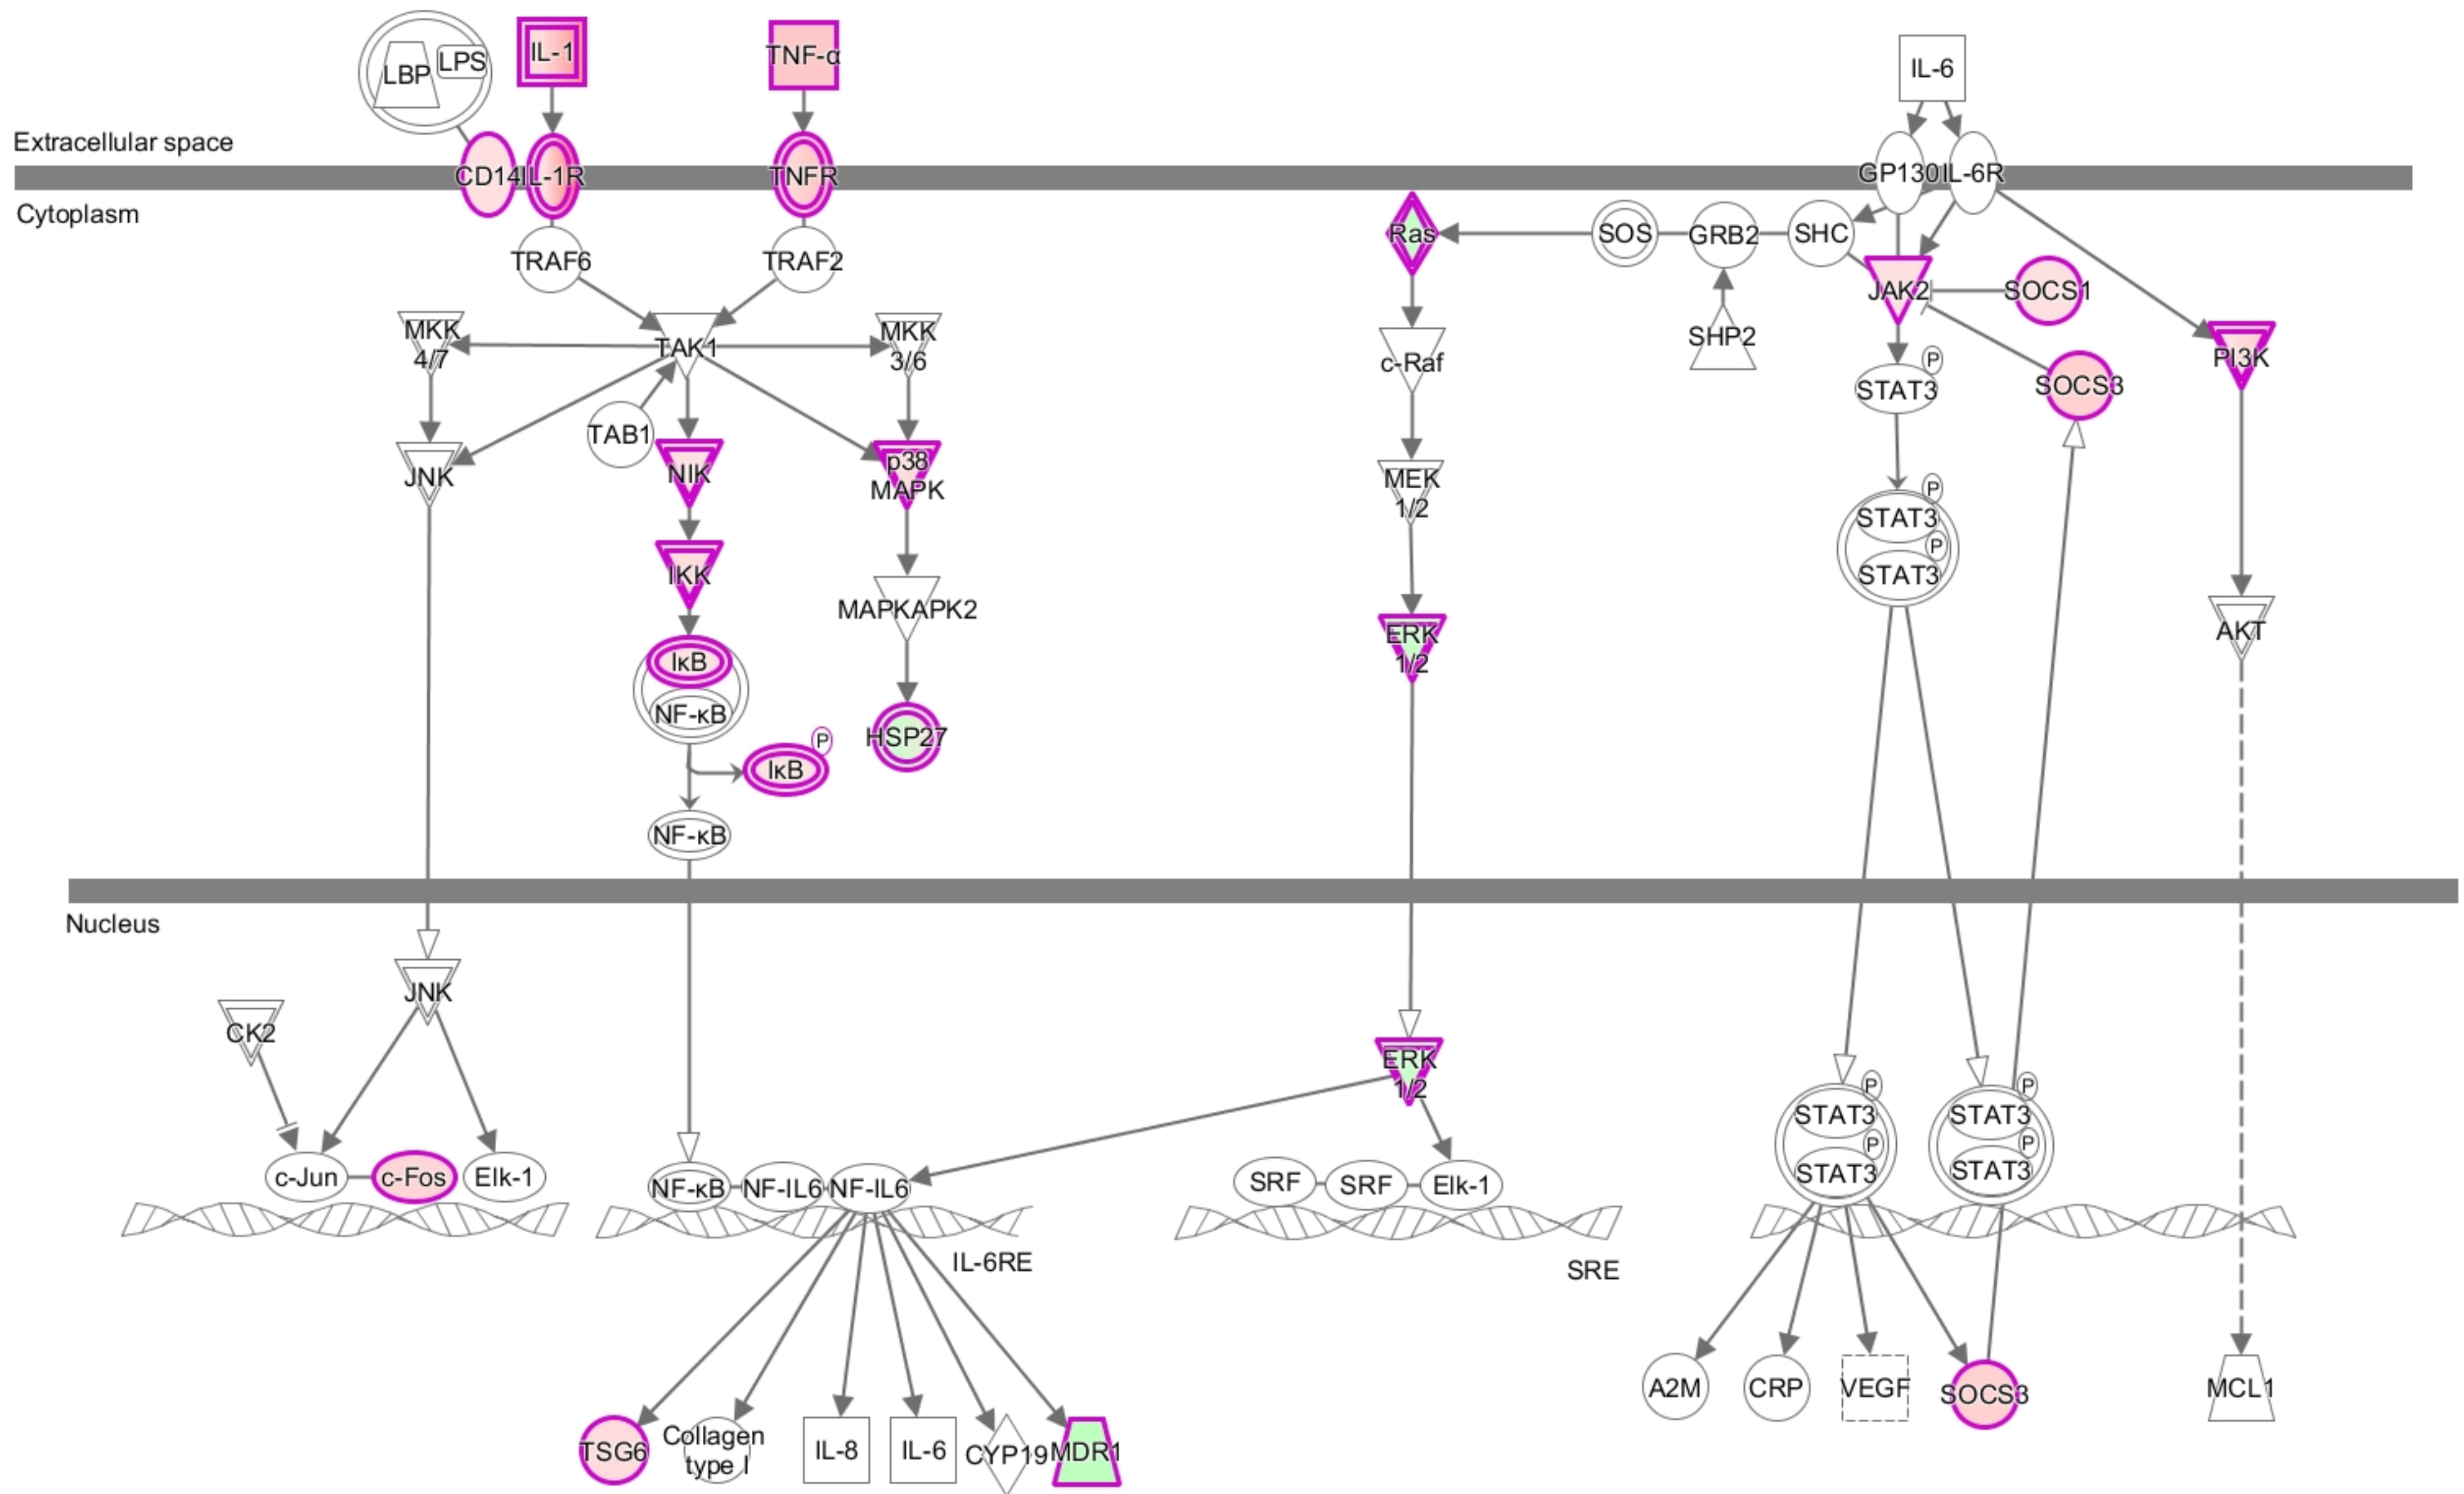

Supplement: 3827841.f10.pdf [file 3827841.f10.pdf]
