# Supplementary material for: Transcriptional Profiling at High Temporal Resolution Reveals Robust Immune/Inflammatory Responses during Rat Sciatic Nerve Recovery
Source: Hindawi journal article supplement (doi:10.1155/2017/3827841), 2017-01-01

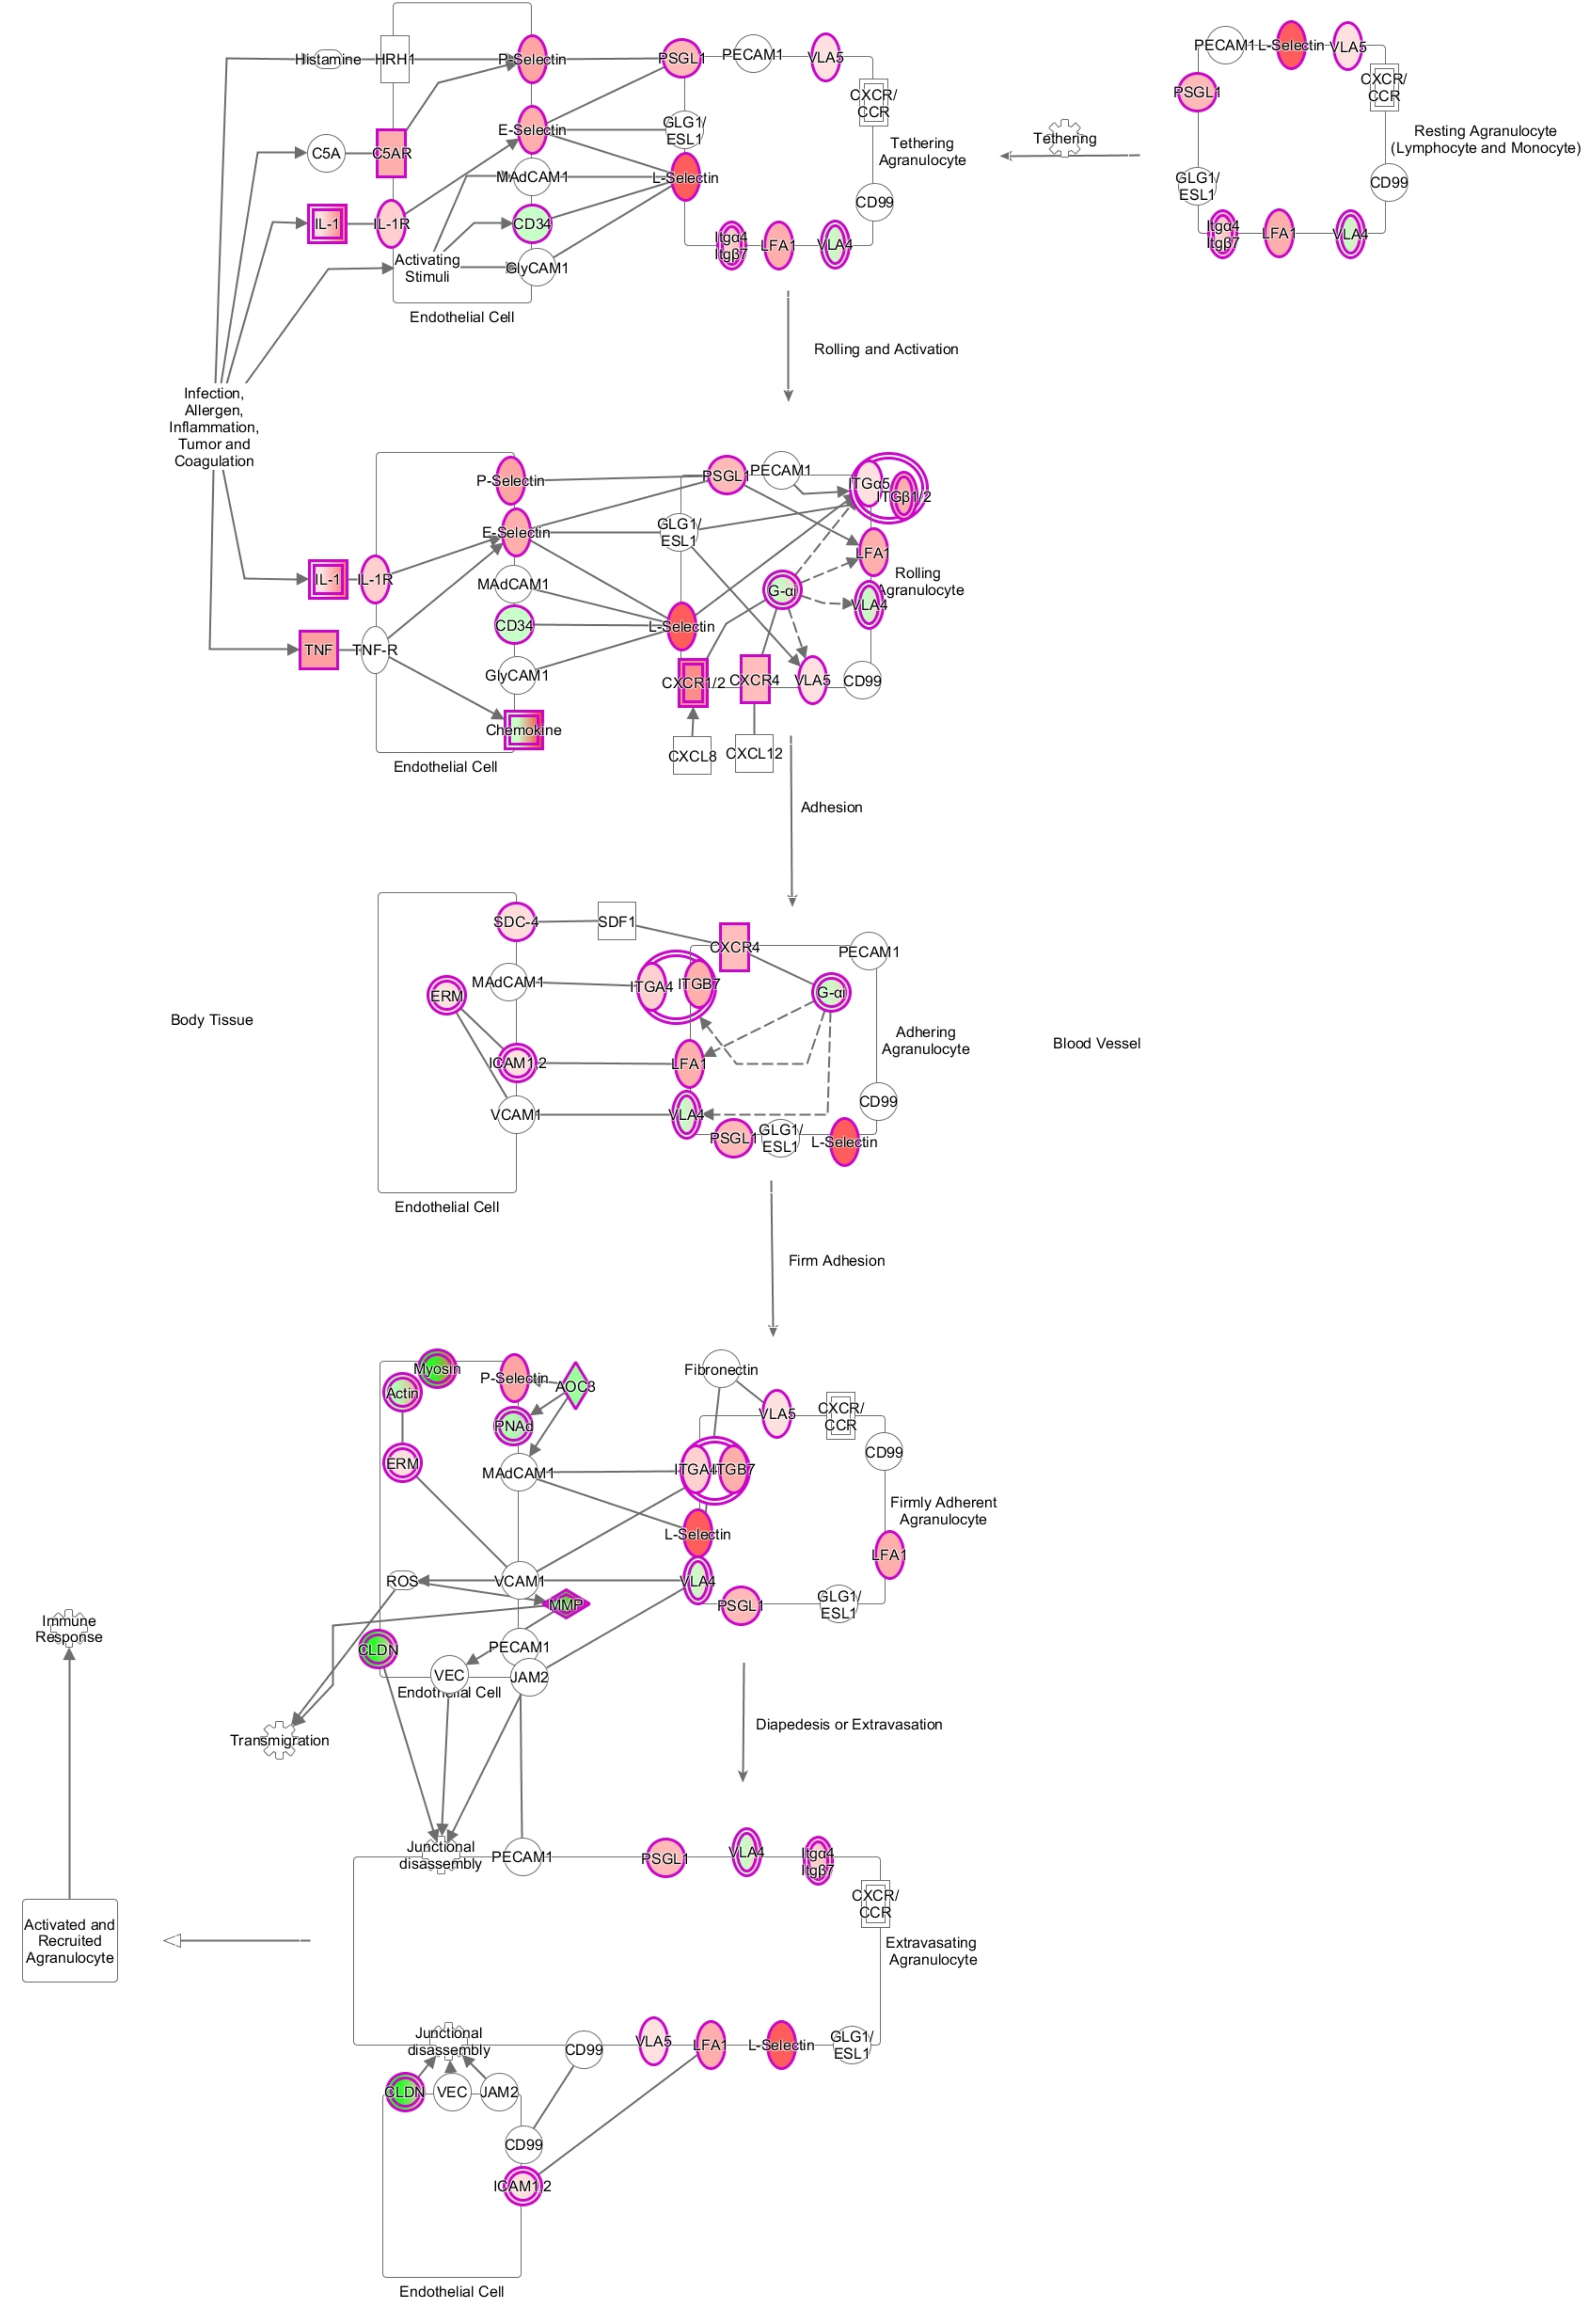

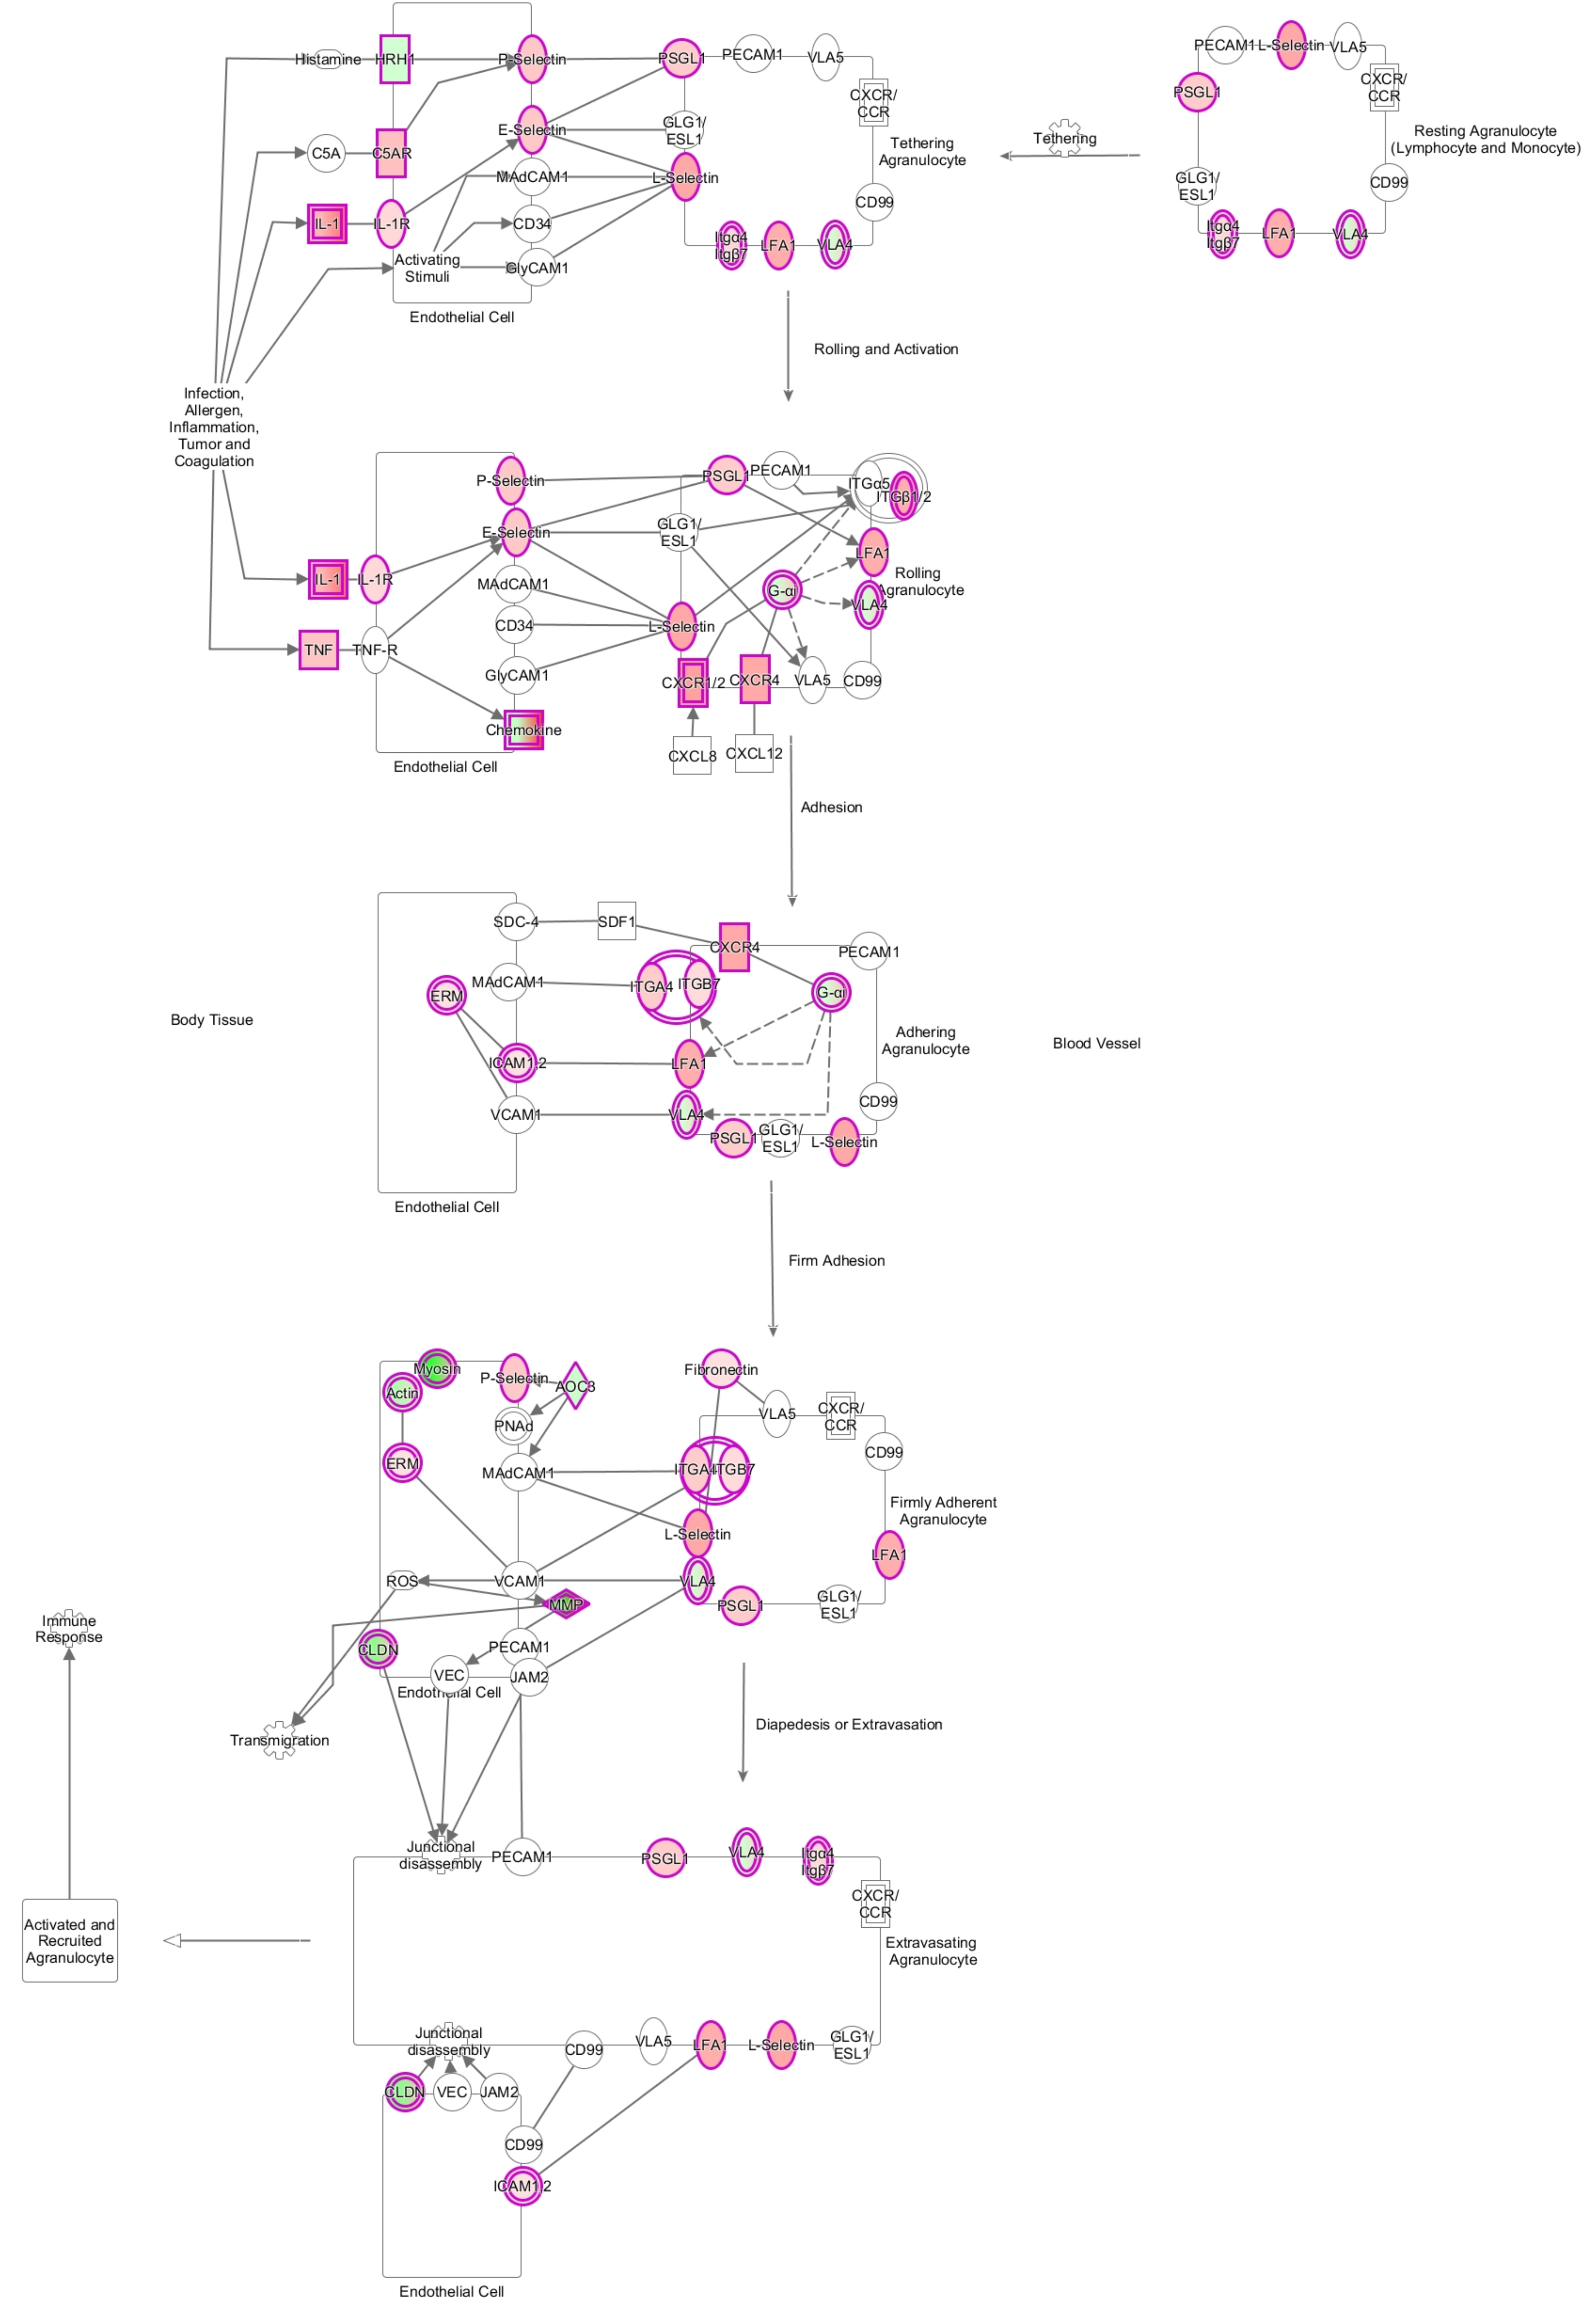

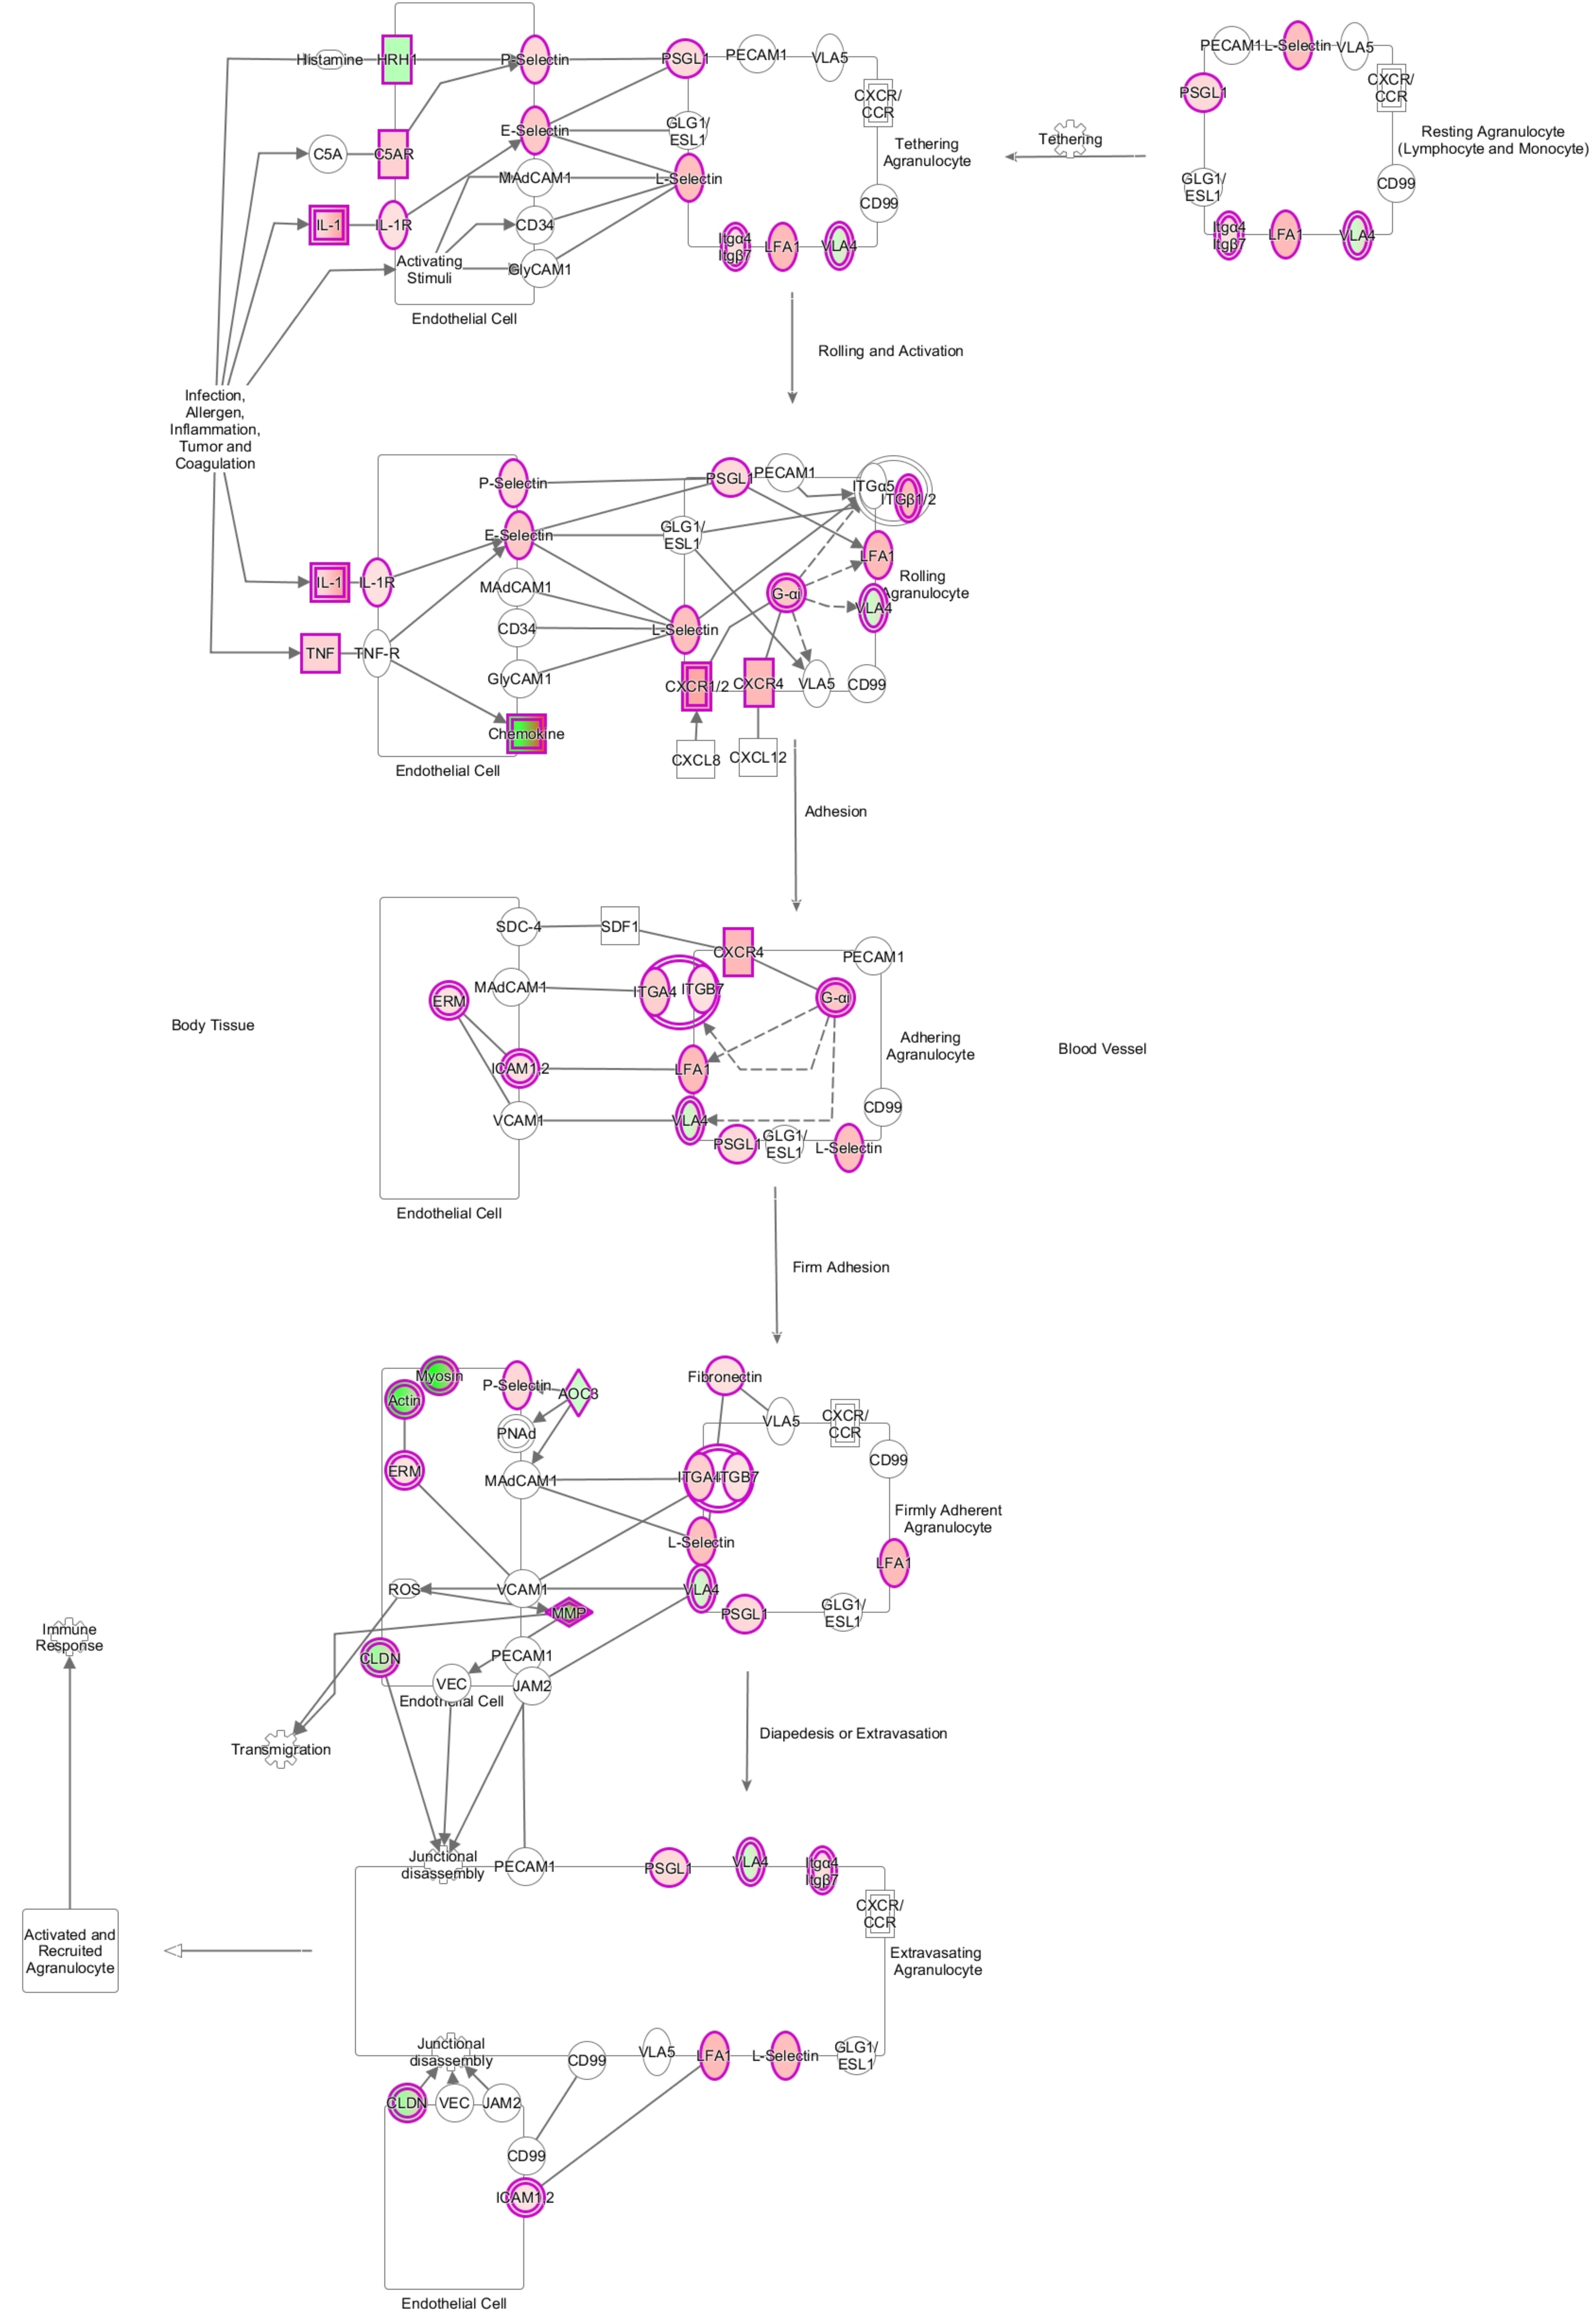

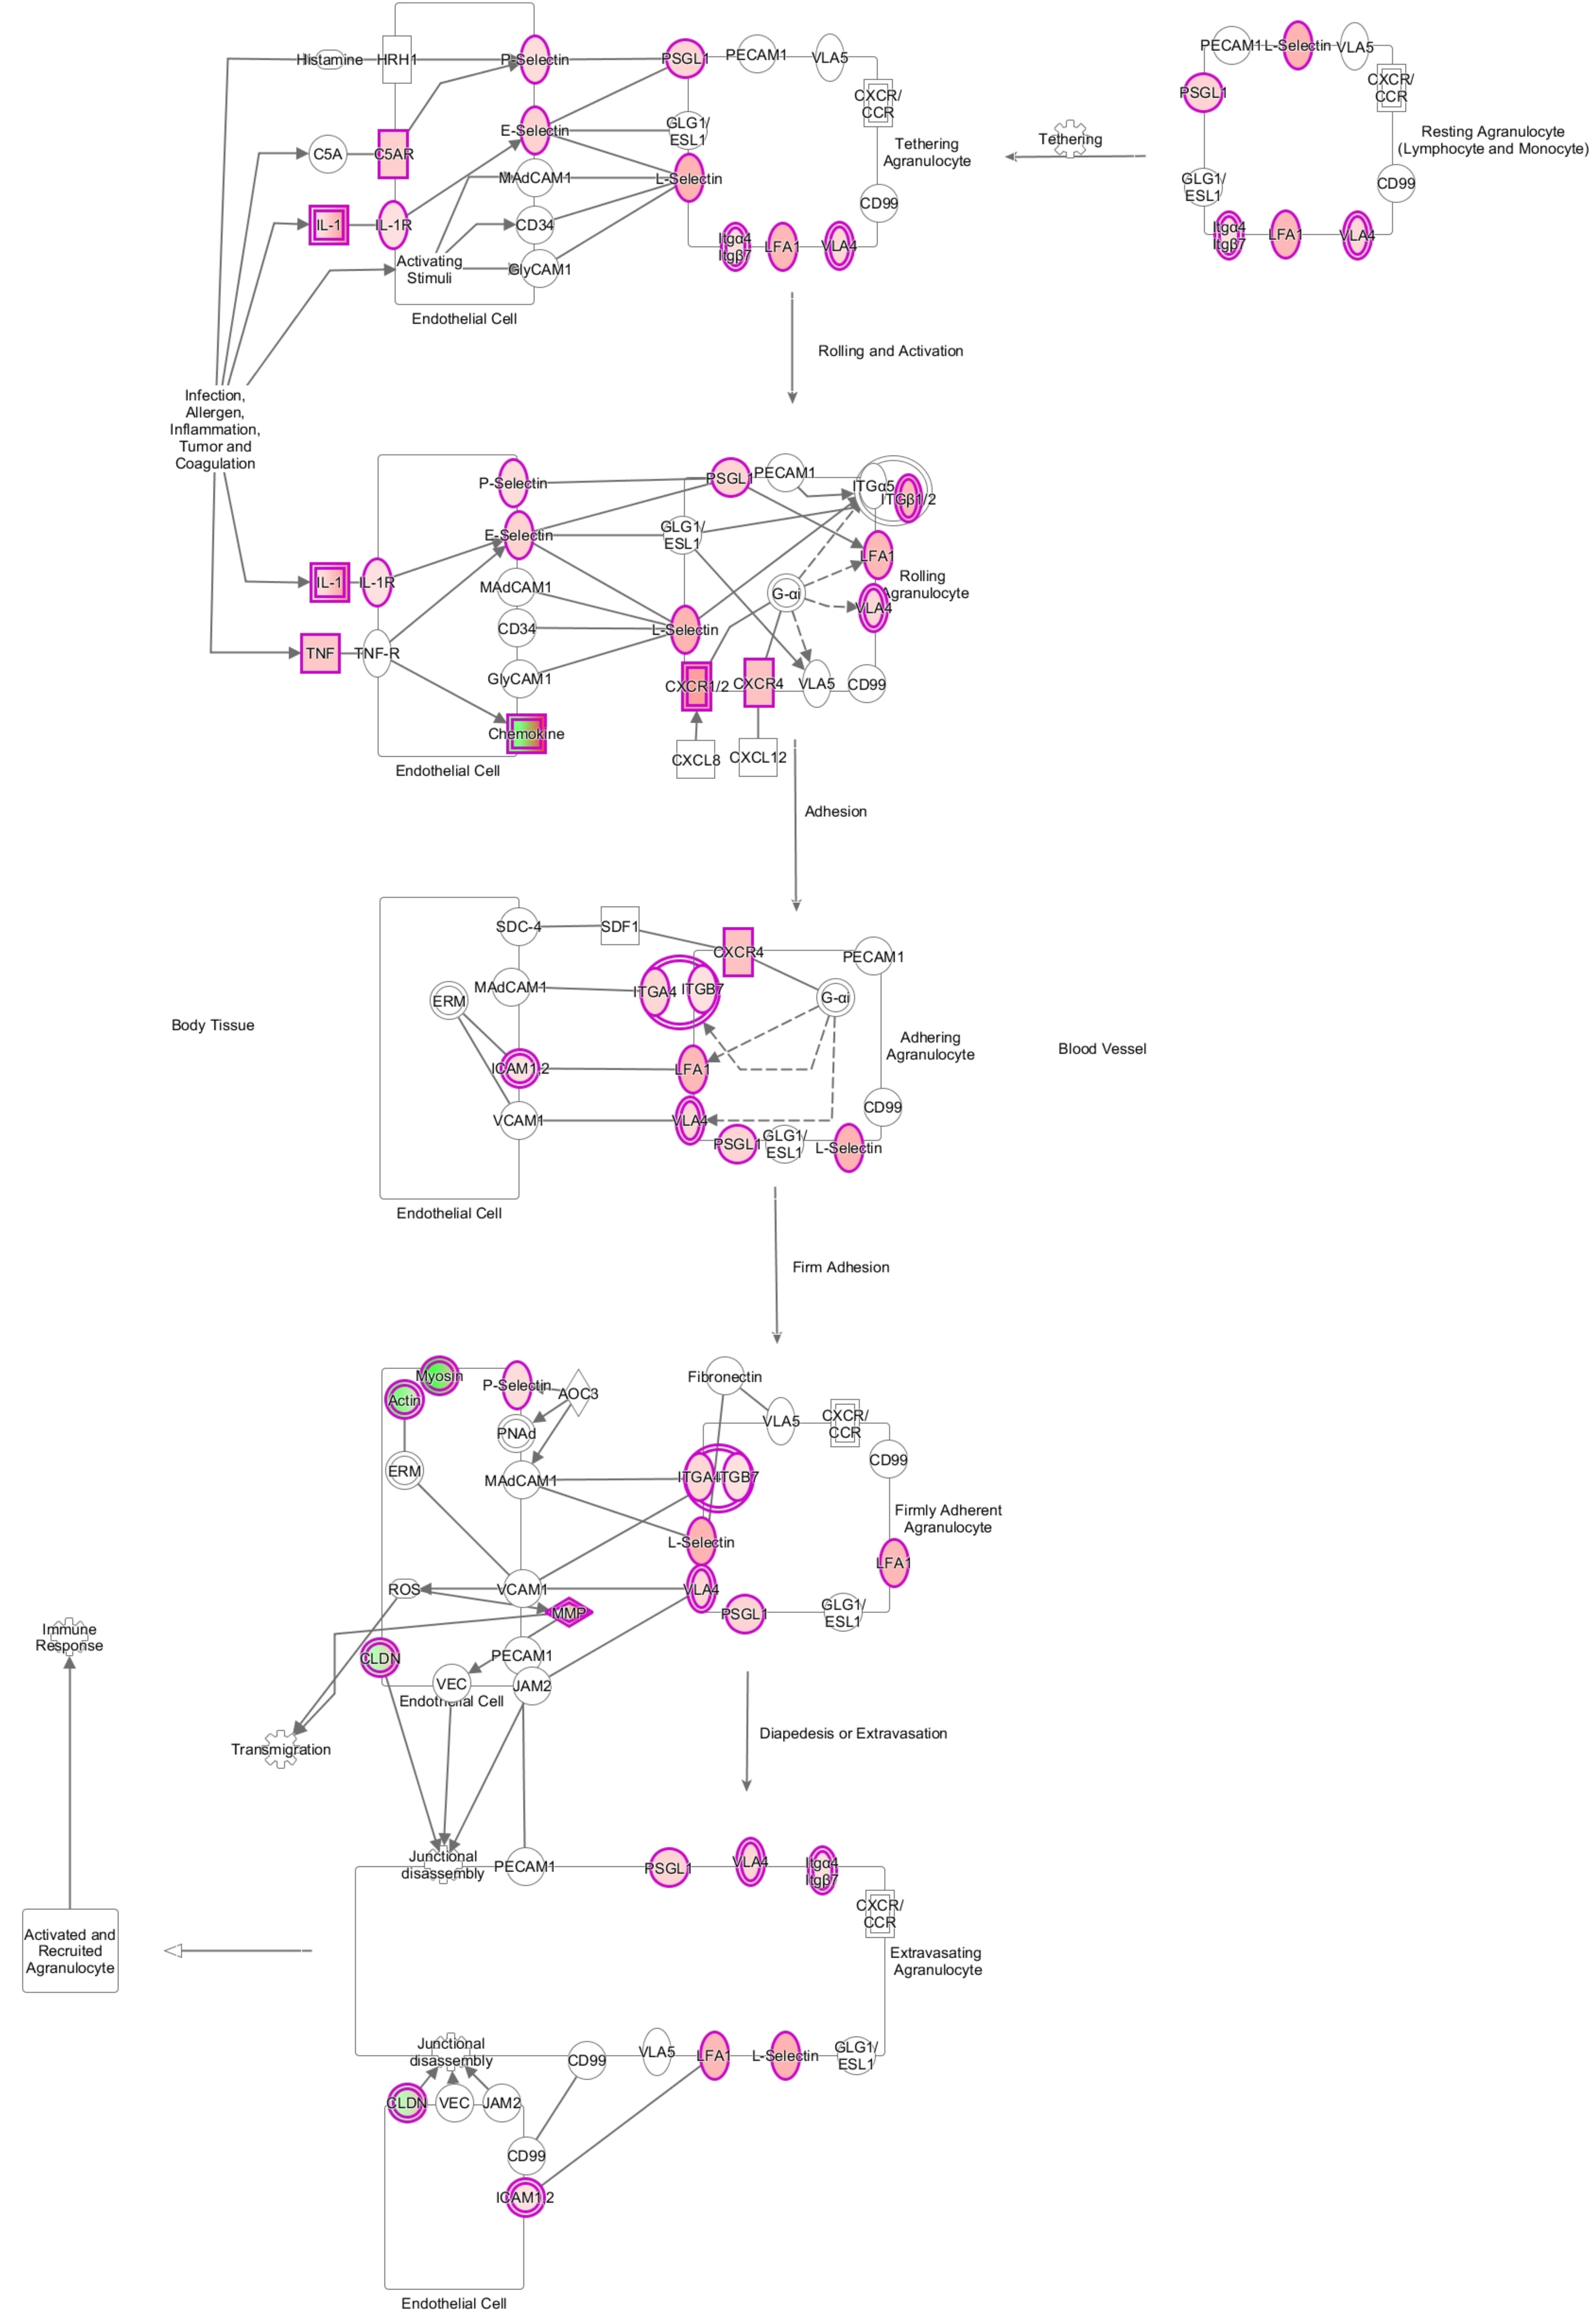

Supplement: f6 [file 3827841.f6.pdf]
