# Supplementary material for: Transcriptional Profiling at High Temporal Resolution Reveals Robust Immune/Inflammatory Responses during Rat Sciatic Nerve Recovery
Source: Mediators Inflamm. 2017 Apr 12;2017:3827841. doi: 10.1155/2017/3827841 (PMC5405595; doi:10.1155/2017/3827841)
Supplement: Supplementary file 1 — Additional file 1. List of primer pairs for qRT-PCR; Additional file 2. Diseases and bio functions of DEGs following nerve injury by IPA analysis; Additional file 3. DEGs in immune cell trafficking following injury; Additional file 4. DEGs in inflammatory response following injury; Additional file 5. DEGs in agranulocyte adhesion and diapedesis following injury; Additional file 6. Schematic network of agranulocyte adhesion and diapedesis signaling following injury; Additional file 7. DEGs in granulocyte adhesion and diapedesis following injury; Additional file 8. Schematic network of granulocyte adhesion and diapedesis signaling following injury; Additional file 9. DEGs in IL-6 signaling following injury; Additional file 10. Schematic network of Il-6 signaling following injury; Additional file 11. DEGs in IL-10 signaling following injury; Additional file 12. Schematic network of Il-10 signaling following injury; Additional file 13. Sciatic injury induced DEGs in agranulocyte adhesion and diapedesis; Additional file 14. Sciatic injury induced DEGs in granulocyte adhesion and diapedesis; Additional file 15. Sciatic injury induced DEGs in IL-6 signaling pathway; Additional file 16. Sciatic injury induced DEGs in IL-10 signaling pathway; Additional file 17. Schematic network of agranulocyte/granulocyte adhesion and diapedesis, IL-6 signaling, and IL-10 signaling. [file 3827841.f1.xlsx]

## Sheet: Sheet1
primer	primer sequence（5’--3’）
IL-10-F	AAGCTGAAGACCCTCTGGATA
IL-10-R	CTTGTAGACACCTTTGTCTTGG
JAK2-F	TTCTGTGGCCTCAGATGT
JAK2-R	TATCATTGCCGATCATTCGC
SELL-F	CCAGTAGCTGTCATGGTC
SELL-R	TCATCCATCCTTTCCTGCG
SELE-F	GGTAAGCCTTACTGGCTTTATC
SELE-R	TAACGGACATTATGCTGGACTC
SELP-F	TCCTGAATGTCAAGCTGTCT
SELP-R	CTGGCATGTGGATTTGTAGT
SELPLG-F	AGCACTGAATCTGTCACAC
SELPLG-R	TGAGGTCTCTGCCTTTATGG
ITGA4-F	TCAAAGACCCAAACGGCA
ITGA4-R	TCCAGCCTTCCACATAACAC
ITGB7-F	GAGGCTGACTGACTTAGGAT
ITGB7-R	CTCTGAAGGCCAGTCTGAAA
18s-F	CGGCTACCACATCCAAGGAA
18s-R	GCTGGAATTACCGCGGCT
