# Supplementary material for: Transcriptional Profiling at High Temporal Resolution Reveals Robust Immune/Inflammatory Responses during Rat Sciatic Nerve Recovery
Source: Mediators Inflamm. 2017 Apr 12;2017:3827841. doi: 10.1155/2017/3827841 (PMC5405595; doi:10.1155/2017/3827841)
Supplement: Supplementary file 3 [file 3827841.f3.xlsx]

## Sheet: Sheet1
1d							4d							7d							14d
Category	Function	Function Annotation	p-value	Molecules	# Molecules		Category	Function	Function Annotation	p-value	Molecules	# Molecules		Category	Function	Function Annotation	p-value	Molecules	# Molecules		Category	Function	Function Annotation	p-value	Molecules	# Molecules
Cellular Growth and Proliferation	proliferation	proliferation of cells	2.08e-74	A2M, AATF, AATK, ABCB1, Abcb1b, ABCB4, ABCC2, ABCC3, ABCC4, ABCC5, ABCG1, ACACA, ACE, ACE2, ACKR3, ACPP, ACSL4, ACSL5, ACTB, ACTG1, ACTL6A, ACTN1, ACVR1C, ADA, ADAM17, ADAMTS1, ADAMTS2, ADAR, ADARB1, ADCY1, ADCY6, ADCYAP1R1, ADGRB1, ADIPOQ, ADORA1, ADRA1A, ADRA1B, ADRA2B, ADRBK1, AEBP1, AGT, AHCY, AHR, AICDA, AIF1, AIMP1, AK2, AK4, AKR1B10, ALCAM, ALDH1A1, ALDH3A1, ALKBH3, Alox12e, ALOX5AP, AMBN,…	1531		Cell Death and Survival	cell death	cell death	2.55e-76	A2M, A4GALT, AATK, ABCA1, ABCB1, ABCB4, ABCC3, ABCC4, ABCC5, ABCC8, ABCC9, ABCD2, ABCG1, ABCG2, ACACA, ACE, ACER2, ACKR3, ACSL4, ACSM5, ACTB, ACTL6A, ACVR1C, ADA, ADAM17, ADAMTSL4, ADARB1, ADCY6, ADD2, ADIPOQ, ADM, ADORA1, ADRA1A, ADRA1B, ADRA1D, ADRB1, ADRBK1, AGR2, AGT, Agtr1b, AHR, AIF1, AIFM1, AIFM3, AKR1B1, ALCAM, ALDH1A1, ALDH1L1, ALDH3A1, ALDH3B1, ALDOC, ALKBH3, ALOX12, ALOX15, ALOX15B, AM…	1415		Hematological System Development and Function	quantity	quantity of leukocytes	1.12e-67	ABCA1, ABCB1, Abcb1b, ABCG2, ADA, ADAM17, ADIPOQ, AGR2, AGT, AHR, ALPL, ANPEP, APOE, ARNTL, ATF3, ATM, B3GNT5, BACH2, BANK1, BATF, BATF3, BCL11A, BCL11B, BCL2A1, BCL2L11, BCL3, BCL6, BDNF, BID, BIRC3, BIRC5, BLK, BLNK, BMF, BRCA2, BST1, BTK, BTLA, BUB1, C1QA, C3, C5AR1, C5AR2, C6, CAMK4, CASP3, CASP8, CBFB, CCL19, CCL2, Ccl2, CCL21, CCL22, CCL3L3, CCL4, CCL5, Ccl7, Ccl9, CCNB2, CCR4, CCR6, CCR7, …	412		Hematological System Development and Function	quantity	quantity of leukocytes	1.37e-82	ABCA1, ABCB1, Abcb1b, ABCG2, ADA, ADAM17, ADGRE5, ADIPOQ, AGR2, AGT, AHR, ALOX15, ALPL, ANPEP, APOB, APOE, ARNTL, ATF3, ATM, B3GNT5, B4GALT1, BACH2, BANK1, BATF, BATF3, BBC3, BCL11B, BCL2A1, BCL2L11, BDNF, BID, BIRC2, BIRC3, BIRC5, BLNK, BMF, BST1, Bst2, BTK, BTLA, C1QA, C3, C4A/C4B, C5AR1, C5AR2, C6, CASP8, CBFB, CCL19, Ccl2, CCL2, CCL21, CCL22, CCL3L3, CCL4, CCL5, Ccl7, Ccl9, CCR6, CCR7, CCR9, …	373
Cellular Growth and Proliferation	proliferation	proliferation of immune cells	1.7e-36	A2M, ABCB1, ABCG1, ACPP, ACTL6A, ADA, ADIPOQ, AHR, AIF1, ANPEP, ANXA1, APOE, ARF6, ARG1, ARHGDIA, ARHGDIB, Art2b, ATM, B3GNT5, BANK1, BATF, BAX, BCL11A, BCL2A1, BCL2L11, BCL3, BCLAF1, BIRC3, BIRC5, BLNK, BMP4, BRCA1, BTG1, BTK, C10orf54, C1QBP, C3, C5AR1, CALCB, CAMP, CASP3, CASP8, CBFB, Ccl2, CCL2, CCL20, CCL21, CCL4, CCNA2, CCR6, CCR7, CD14, CD180, CD19, CD1D, CD2, CD209, CD22, CD226, CD244, CD…	387		Cell Death and Survival	cell death	cell death of immune cells	9.87e-42	ABCB1, ABCC4, ABCG1, ACTL6A, ADA, ADAM17, ADRB1, AHR, AIFM1, ANPEP, ANXA1, APAF1, APOE, Art2b, ATF3, ATM, AURKB, BAG1, BAX, BCL11A, BCL11B, BCL2A1, BCL2L11, BCL3, BID, BIRC2, BIRC3, BIRC5, BLNK, BMF, BMP4, BRCA1, BTG1, BTK, C1QA, C3, CACNB3, CAMK4, CASP1, CASP3, CASP4, CASP6, CASP7, CASP8, CAV1, CBFB, CCDC86, CCL19, Ccl2, CCL2, CCL21, CCL4, CCL5, CCNB1, CCR7, CD14, CD2, CD22, CD226, CD247, Cd24a,…	343		Hematological System Development and Function	quantity	quantity of blood cells	4.6e-64	ABCA1, ABCB1, Abcb1b, ABCG2, ADA, ADAM17, ADIPOQ, AGR2, AGT, AHR, ALPL, ANPEP, APOE, ARNTL, ATF3, ATG7, ATM, B3GNT5, BACH2, BANK1, BATF, BATF3, BCL11A, BCL11B, BCL2A1, BCL2L11, BCL3, BCL6, BDNF, BID, BIRC3, BIRC5, BLK, BLNK, BMF, BMP4, BRCA2, BST1, BTK, BTLA, BUB1, C1QA, C3, C5AR1, C5AR2, C6, CAMK4, CASP3, CASP8, CBFB, CCL19, CCL2, Ccl2, CCL21, CCL22, CCL3L3, CCL4, CCL5, Ccl7, Ccl9, CCNB2, CCND1,…	443		Hematological System Development and Function	quantity	quantity of blood cells	7.84e-76	ABCA1, ABCB1, Abcb1b, ABCG2, ADA, ADAM17, ADGRE5, ADIPOQ, AGR2, AGT, AHR, ALOX15, ALPL, ANPEP, APOB, APOE, ARNTL, ATF3, ATM, B3GNT5, B4GALT1, BACH2, BANK1, BATF, BATF3, BBC3, BCL11B, BCL2A1, BCL2L11, BDNF, BID, BIRC2, BIRC3, BIRC5, BLNK, BMF, BST1, Bst2, BTK, BTLA, C1QA, C3, C4A/C4B, C5AR1, C5AR2, C6, CASP8, CBFB, CCL19, Ccl2, CCL2, CCL21, CCL22, CCL3L3, CCL4, CCL5, Ccl7, Ccl9, CCR6, CCR7, CCR9, …	393
Cellular Growth and Proliferation	proliferation	proliferation of blood cells	4.61e-36	A2M, ABCB1, ABCG1, ACPP, ACTL6A, ADA, ADIPOQ, AHR, AIF1, ANPEP, ANXA1, APOE, ARF6, ARG1, ARHGDIA, ARHGDIB, Art2b, ATG7, ATM, B3GNT5, BANK1, BATF, BAX, BCL11A, BCL2A1, BCL2L11, BCL3, BCLAF1, BIRC3, BIRC5, BLNK, BMP4, BRCA1, BTG1, BTK, C10orf54, C1QBP, C3, C5AR1, CALCB, CAMP, CASP3, CASP8, CBFB, Ccl2, CCL2, CCL20, CCL21, CCL24, CCL3L3, CCL4, CCNA2, CCND1, CCR6, CCR7, CD14, CD163, CD180, CD19, CD1D,…	406		Cell Death and Survival	cell death	cell death of blood cells	3.05e-41	ABCB1, ABCC4, ABCG1, ACTL6A, ADA, ADAM17, ADRB1, AHR, AIFM1, ANPEP, ANXA1, APAF1, APOE, Art2b, ATF3, ATM, AURKB, BAG1, BAX, BCL11A, BCL11B, BCL2A1, BCL2L11, BCL3, BID, BIRC2, BIRC3, BIRC5, BLNK, BMF, BMP4, BRCA1, BTG1, BTK, C1QA, C3, CACNB3, CAMK4, CASP1, CASP3, CASP4, CASP6, CASP7, CASP8, CAV1, CBFB, CCDC86, CCL19, CCL2, Ccl2, CCL21, CCL3L3, CCL4, CCL5, CCNB1, CCR7, CD14, CD2, CD22, CD226, CD247…	354		Hematological System Development and Function	quantity	quantity of lymphocytes	2.5e-51	ABCB1, Abcb1b, ABCG2, ADA, ADIPOQ, AGT, AHR, ANPEP, APOE, ARNTL, ATM, B3GNT5, BACH2, BANK1, BATF, BATF3, BCL11A, BCL11B, BCL2A1, BCL2L11, BCL3, BID, BIRC5, BLK, BLNK, BMF, BST1, BTK, BTLA, C3, C5AR1, CAMK4, CASP3, CASP8, CBFB, CCL19, CCL2, Ccl2, CCL21, CCL4, CCL5, CCNB2, CCR4, CCR6, CCR7, CCR9, CD180, CD1D, CD244, CD247, CD27, CD28, CD3D, CD3E, CD3G, CD4, CD40, CD44, CD5, CD5L, CD69, CD7, CD72, C…	313		Hematological System Development and Function	quantity	quantity of lymphocytes	6.08e-67	ABCB1, Abcb1b, ABCG2, ADA, ADIPOQ, AGT, AHR, ANPEP, APOE, ARNTL, ATM, B3GNT5, B4GALT1, BACH2, BANK1, BATF, BATF3, BBC3, BCL11B, BCL2A1, BCL2L11, BID, BIRC2, BIRC5, BLNK, BMF, BST1, Bst2, BTK, BTLA, C3, C5AR1, CASP8, CBFB, CCL19, CCL2, Ccl2, CCL21, CCL4, CCL5, CCR6, CCR7, CCR9, CD180, CD1D, CD244, CD247, CD27, CD274, CD28, CD3D, CD3E, CD3G, CD4, CD40, CD44, CD5, CD5L, CD69, CD7, CD72, CD74, CD80, …	291
Cellular Growth and Proliferation	proliferation	proliferation of mononuclear leukocytes	1.57e-35	A2M, ABCG1, ACPP, ADA, ADIPOQ, AHR, AIF1, ANPEP, ANXA1, APOE, ARF6, ARG1, ARHGDIA, ARHGDIB, Art2b, ATM, B3GNT5, BANK1, BATF, BAX, BCL11A, BCL2A1, BCL2L11, BCL3, BCLAF1, BIRC3, BIRC5, BLNK, BMP4, BRCA1, BTK, C10orf54, C1QBP, C3, C5AR1, CALCB, CAMP, CASP3, CASP8, CBFB, CCL2, Ccl2, CCL21, CCL4, CCR6, CCR7, CD14, CD180, CD19, CD1D, CD2, CD209, CD22, CD226, CD244, CD247, Cd24a, CD27, CD274, CD300A, CD…	363		Cell Death and Survival	cell death	cell death of tumor cell lines	4.06e-38	A4GALT, AATK, ABCB1, ABCB4, ABCC4, ABCG2, ACACA, ACER2, ACKR3, ACSM5, ACVR1C, ADAM17, ADIPOQ, ADM, ADORA1, ADRBK1, AGR2, AGT, AHR, AIFM1, AKR1B1, ALCAM, ALDH1L1, ALKBH3, ALOX12, ALOX15, ANXA2, APAF1, APEX1, APOE, AR, ARG1, ARHGAP4, ARL11, ARRB2, ARSB, ATAD2, ATF1, ATF3, ATG10, ATG12, ATG7, ATM, ATN1, ATP13A2, ATP2A1, ATP5A1, AURKA, AURKB, B2M, BAG1, BARD1, BAX, BAZ1A, BCHE, BCL2A1, BCL2L11, BCL3,…	651		Hematological System Development and Function	quantity	quantity of mononuclear leukocytes	8.47e-51	ABCB1, Abcb1b, ABCG2, ADA, ADIPOQ, AGT, AHR, ANPEP, APOE, ARNTL, ATM, B3GNT5, BACH2, BANK1, BATF, BATF3, BCL11A, BCL11B, BCL2A1, BCL2L11, BCL3, BID, BIRC5, BLK, BLNK, BMF, BST1, BTK, BTLA, C3, C5AR1, CAMK4, CASP3, CASP8, CBFB, CCL19, CCL2, Ccl2, CCL21, CCL4, CCL5, Ccl7, CCNB2, CCR4, CCR6, CCR7, CCR9, CD180, CD1D, CD244, CD247, CD27, CD28, CD3D, CD3E, CD3G, CD4, CD40, CD44, CD5, CD5L, CD69, CD7, C…	321		Hematological System Development and Function	quantity	quantity of mononuclear leukocytes	2.47e-65	ABCB1, Abcb1b, ABCG2, ADA, ADIPOQ, AGT, AHR, ANPEP, APOE, ARNTL, ATM, B3GNT5, B4GALT1, BACH2, BANK1, BATF, BATF3, BBC3, BCL11B, BCL2A1, BCL2L11, BID, BIRC2, BIRC5, BLNK, BMF, BST1, Bst2, BTK, BTLA, C3, C5AR1, CASP8, CBFB, CCL19, CCL2, Ccl2, CCL21, CCL4, CCL5, Ccl7, CCR6, CCR7, CCR9, CD180, CD1D, CD244, CD247, CD27, CD274, CD28, CD3D, CD3E, CD3G, CD4, CD40, CD44, CD5, CD5L, CD69, CD7, CD72, CD74, …	296
Cellular Growth and Proliferation	proliferation	proliferation of lymphocytes	2.89e-35	A2M, ABCG1, ACPP, ADA, ADIPOQ, AHR, AIF1, ANXA1, APOE, ARF6, ARG1, ARHGDIA, ARHGDIB, Art2b, ATM, B3GNT5, BANK1, BATF, BAX, BCL11A, BCL2A1, BCL2L11, BCL3, BCLAF1, BIRC3, BIRC5, BLNK, BMP4, BRCA1, BTK, C10orf54, C1QBP, C3, C5AR1, CALCB, CAMP, CASP3, CASP8, CBFB, CCL2, Ccl2, CCL21, CCL4, CCR6, CCR7, CD14, CD180, CD19, CD1D, CD2, CD209, CD22, CD226, CD244, CD247, Cd24a, CD27, CD274, CD300A, CD300C, C…	358		Cell Death and Survival	cell death	cell death of mononuclear leukocytes	7.16e-29	ADA, ADRB1, AHR, AIFM1, APAF1, APOE, Art2b, ATM, AURKB, BAX, BCL11A, BCL11B, BCL2A1, BCL2L11, BCL3, BID, BIRC5, BLNK, BMF, BMP4, BRCA1, BTK, CASP1, CASP3, CASP4, CASP6, CASP7, CASP8, CAV1, CCDC86, CCL19, Ccl2, CCL4, CCL5, CCNB1, CD2, CD22, CD226, CD247, Cd24a, CD27, CD28, CD38, CD3E, CD4, CD40, CD44, CD5, CD7, CD80, CD9, CDK1, CDK2, CDKN1A, CDKN1B, CDKN2A, CHEK1, CHEK2, CIITA, CLEC10A, COL1A1, CO…	208		Hematological System Development and Function	quantity	quantity of T lymphocytes	4.81e-42	ABCB1, Abcb1b, ABCG2, ADA, ADIPOQ, AGT, AHR, ANPEP, APOE, ATM, BACH2, BATF, BATF3, BCL11A, BCL11B, BCL2A1, BCL2L11, BIRC5, BMF, BTLA, C5AR1, CAMK4, CASP3, CASP8, CBFB, CCL19, Ccl2, CCL21, CCL4, CCL5, CCNB2, CCR4, CCR6, CCR7, CCR9, CD1D, CD244, CD247, CD27, CD28, CD3D, CD3E, CD3G, CD4, CD40, CD44, CD5, CD5L, CD69, CD7, CD80, CD83, CD84, CD86, CD8A, CD8B, CDKN1A, CDKN2A, CHST3, CIITA, CISH, CORO1A,…	241		Hematological System Development and Function	quantity	quantity of T lymphocytes	1.36e-52	ABCB1, Abcb1b, ABCG2, ADA, ADIPOQ, AGT, AHR, ANPEP, APOE, ATM, BACH2, BATF, BATF3, BBC3, BCL11B, BCL2A1, BCL2L11, BIRC5, BMF, Bst2, BTLA, C5AR1, CASP8, CBFB, CCL19, Ccl2, CCL21, CCL4, CCL5, CCR6, CCR7, CCR9, CD1D, CD244, CD247, CD27, CD274, CD28, CD3D, CD3E, CD3G, CD4, CD40, CD44, CD5, CD5L, CD69, CD7, CD74, CD80, CD83, CD84, CD86, CD8A, CD8B, CDKN2A, CHRNA1, CISH, CORO1A, CTSD, CTSE, CTSS, CTSV,…	222
Cellular Growth and Proliferation	proliferation	proliferation of T lymphocytes	1.23e-27	A2M, ABCG1, ACPP, AHR, AIF1, ANXA1, APOE, ARF6, ARG1, ARHGDIA, ARHGDIB, Art2b, ATM, BATF, BAX, BCLAF1, BIRC3, BIRC5, BMP4, BRCA1, C10orf54, C1QBP, C3, C5AR1, CALCB, CAMP, CASP3, CASP8, CBFB, CCL2, Ccl2, CCL21, CCL4, CCR6, CCR7, CD14, CD19, CD1D, CD2, CD209, CD226, CD244, CD247, Cd24a, CD27, CD274, CD37, CD38, CD3G, CD40, CD44, CD5, CD6, CD80, CD83, CD84, CD86, CD8A, CDC25A, CDK2, CDKN1A, CDKN1B, …	289		Cell Death and Survival	cell death	cell death of lymphocytes	1.33e-27	ADA, ADRB1, AHR, AIFM1, APAF1, APOE, Art2b, ATM, AURKB, BAX, BCL11A, BCL11B, BCL2A1, BCL2L11, BCL3, BID, BIRC5, BLNK, BMF, BMP4, BRCA1, BTK, CASP1, CASP3, CASP4, CASP6, CASP7, CASP8, CAV1, CCDC86, CCL19, Ccl2, CCL4, CCL5, CCNB1, CD2, CD22, CD226, CD247, Cd24a, CD27, CD28, CD38, CD3E, CD4, CD40, CD44, CD5, CD7, CD80, CD9, CDK1, CDK2, CDKN1A, CDKN1B, CDKN2A, CHEK1, CHEK2, CIITA, CLEC10A, COL1A1, CO…	201		Hematological System Development and Function	quantity	quantity of phagocytes	8.56e-35	ABCA1, ADA, ADAM17, ADIPOQ, AGR2, AGT, AHR, APOE, ARNTL, ATF3, BATF3, BCL11A, BCL2A1, BCL2L11, BCL3, BID, BIRC3, C1QA, C3, C5AR1, C5AR2, C6, CCL19, Ccl2, CCL2, CCL21, CCL22, CCL3L3, Ccl7, Ccl9, CCR4, CCR6, CCR7, CD1D, CD200R1, CD300A, CD40, CD83, CDKN1A, CDKN2B, CERK, CES1, CFH, CIITA, CLEC11A, CLEC4D, CLEC4E, CLEC7A, CNR2, CSF1R, CSF3R, CTSS, CTSV, CX3CR1, CXCL10, CXCL14, CXCR6, CYBB, CYP1A1, DD…	186		Hematological System Development and Function	quantity	quantity of phagocytes	1.66e-44	ABCA1, ADA, ADAM17, ADIPOQ, AGR2, AGT, AHR, APOB, APOE, ARNTL, ATF3, B4GALT1, BATF3, BCL2A1, BCL2L11, BID, BIRC3, C1QA, C3, C4A/C4B, C5AR1, C5AR2, C6, CCL19, CCL2, Ccl2, CCL21, CCL22, CCL3L3, Ccl7, Ccl9, CCR6, CCR7, CD1D, CD200R1, CD300A, CD40, CD83, CERK, CES1, CFH, CLEC4D, CLEC4E, CLEC7A, CNR2, CSF1R, CSF3R, CTSS, CTSV, CX3CR1, CXCL10, CXCL13, CXCR6, CYBB, CYP1A1, DDR1, DOCK8, DOK1, DOK2, ESR2,…	174
Cellular Growth and Proliferation	proliferation	proliferation of tumor cell lines	1.77e-23	A2M, AATF, ABCB1, ACACA, ACKR3, ACPP, ACSL4, ACSL5, ACTB, ACVR1C, ADAM17, ADAMTS1, ADIPOQ, ADRA1B, AGT, AHR, AKR1B10, ALCAM, ALDH1A1, ALKBH3, AMH, ANGPTL4, ANTXR1, ANXA1, ANXA2, ANXA7, APAF1, APEX1, APP, AQP1, AR, AREG, ARF6, ARG1, ARHGEF2, ARID3A, ARL11, ASCC3, ATAD2, ATF5, ATG7, ATM, AURKA, AURKB, B3GAT1, BAG1, BARD1, BAX, BID, BIRC5, BMP2, BMP4, BMP6, BOP1, BRCA1, BRCA2, BTC, BUB1, C14orf169, …	588		Cell Death and Survival	cell death	cell death of T lymphocytes	5.08e-23	ADA, ADRB1, AHR, AIFM1, APAF1, APOE, Art2b, ATM, BAX, BCL11B, BCL2A1, BCL2L11, BCL3, BID, BIRC5, BMF, BMP4, BRCA1, CASP1, CASP3, CASP6, CASP7, CASP8, CAV1, CCDC86, CCL19, Ccl2, CCL4, CCL5, CCNB1, CD2, CD247, Cd24a, CD27, CD28, CD38, CD3E, CD4, CD40, CD44, CD5, CD7, CD9, CDK1, CDK2, CDKN1A, CDKN1B, CDKN2A, CHEK1, CHEK2, CIITA, CLEC10A, CORO1A, CST3, CTLA4, CTSD, CXCL10, CXCR4, DCK, DDIT4, DEF6, DH…	162		Hematological System Development and Function	quantity	quantity of myeloid cells	1.89e-27	ADA, ADAM17, ADIPOQ, AHR, APOE, ARNTL, BCL2L11, BCL6, BDNF, BID, BRCA2, C1QA, C3, C5AR1, C5AR2, C6, CASP8, Ccl2, CCL2, CCL22, CCL3L3, CCR4, CCR6, CD101, CD1D, CD200R1, CD300A, CD40, CD8A, CD97, CDKN1A, CERK, CFH, CISH, CLEC11A, CLEC4E, CLEC7A, CNR2, CSF1R, CSF3R, CTSE, CXCL6, CXCR4, CYBB, CYP1A1, DOK1, ESR2, F2RL1, FASLG, FCGR1A, FCGR2A, FCGR2B, FES, FUT4, FUT7, FZD9, GADD45A, GHR, GPR132, GRK6, …	152		Hematological System Development and Function	quantity	quantity of antigen presenting cells	3.14e-33	ABCA1, ADA, ADIPOQ, AGT, APOB, APOE, BATF3, BCL2L11, BDNF, BID, BIRC3, C4A/C4B, C5AR1, CCL19, CCL2, Ccl2, CCL21, CCL22, Ccl9, CCR6, CCR7, CD200R1, CD40, CD83, CES1, CLEC4D, CLEC4E, CSF1R, CTSS, CTSV, CX3CR1, CXCL10, CXCL13, CXCR6, DDR1, DOCK8, F2RL1, FCER1G, FCGR2B, FLT3, GPR132, GPR68, GREM1, HAVCR2, HBEGF, HCK, HSD11B1, IL10, IL12B, IL12RB2, IL18, IL1A, IL1B, IL1R1, IL1RN, IL2RG, IL7R, INPP5D, …	115
Cellular Growth and Proliferation	proliferation	proliferation of connective tissue cells	8e-22	ACTB, ADAR, ADIPOQ, AEBP1, AGT, AHR, AIF1, AIMP1, AMBN, ANXA2, APLN, AQP1, AR, AREG, ARID3A, ATF1, ATIC, ATM, B4GALT7, BAX, BGN, BMP2, BMP4, BMP6, BRCA1, BRCA2, BTC, BUB1, CASR, CBX7, CCL2, CCL24, CCNA2, CCNB1, CCND1, CCNE1, CCNF, CD300A, CD40, CD44, CDH1, CDK2, CDK4, CDKN1A, CDKN1B, Cdkn1c, CEBPB, CIITA, CNR2, COL14A1, COL1A1, CSF1R, CSK, CTSB, CTSD, CTSV, CXCL3, CXCR3, DCN, DDR2, DKK3, DMP1, DO…	272		Cell Death and Survival	cell death	cell death of myeloid cells	2.06e-21	ABCB1, ABCC4, ABCG1, ADAM17, AHR, ANPEP, ANXA1, APOE, ATF3, BAX, BCL2A1, BID, BIRC2, BIRC3, BIRC5, BTG1, BTK, C1QA, CASP1, CASP3, CASP4, CASP6, CASP7, CASP8, CCL2, CCL5, CD14, CD40, CD44, CD5L, CD69, CDK2, CDKN1A, CDKN2A, CTSB, CXCL2, CXCR4, CYBB, DLL1, EIF2AK2, ELANE, FADD, FASLG, FCER1A, FCER1G, FCGR1A, FOS, GPR132, GSN, HAVCR2, HIF1A, HMOX1, IFNAR1, IL10, IL12A, IL18, IL1B, IL1RL1, IL1RN, IL6,…	116		Hematological System Development and Function	quantity	quantity of hematopoietic progenitor cells	5.94e-25	ABCB1, Abcb1b, AHR, APOE, ARNTL, ATG7, ATM, BCL11A, BCL11B, BCL2L11, BCL3, BIRC5, BLK, BLNK, BMF, BRCA2, BTK, CASP3, CASP8, CBFB, CCNB2, CCND1, CCR6, CCR7, CCR9, CD180, CD244, CD247, CD28, CD3E, CD3G, CD4, CD40, CD44, CD5, CD5L, CD69, CD7, CD72, CD80, CD86, CD8A, CD8B, CD9, CDH17, CDK4, CDKN1A, CDKN2A, CIB1, CIITA, CLEC11A, CORO1A, CSF3R, CTSD, CTSE, CXCR4, DCLRE1C, DLK1, DNASE2, DOK1, DYRK3, EPB…	177		Hematological System Development and Function	quantity	quantity of B lymphocytes	3.85e-33	AHR, APOE, ARNTL, ATM, B3GNT5, BACH2, BANK1, BCL2A1, BCL2L11, BLNK, BMF, BST1, BTK, C3, CASP8, CCR6, CCR7, CCR9, CD180, CD27, CD274, CD28, CD40, CD69, CD72, CD74, CD80, CD84, CDH17, CEBPE, Cmah, CNR2, CXCL13, CXCR4, DAPP1, DCLRE1C, DLK1, DOCK8, ESR2, FCER1G, FCGR1A, FCGR2A, FCGR2B, FCMR, FES, FLT3, FOS, FZD9, GAPT, HCLS1, HGF, HLA-DQA1, ICOS, IGF2, IKZF3, IL10, IL18, IL21R, IL2RB, IL2RG, IL7R, IN…	135
Cellular Growth and Proliferation	proliferation	proliferation of fibroblast cell lines	8.95e-17	A2M, ACKR3, ADIPOQ, ADRA1A, ADRA1B, AHR, APEX1, AREG, ATIC, ATM, BATF, BAX, BMP2, BMP4, BOP1, BRCA1, BTG1, BTG3, C1QTNF3, CCND1, CCNE1, CD9, CDCA5, CDK4, CDKN1A, CDKN1B, CEACAM1, CEBPB, CKS1B, CKS2, COL1A1, COPS5, CSF1R, CSF2RA, CSF2RB, CTSD, CXCL10, CXCL14, DPY30, E2F1, E2F3, E2F4, E2F7, EBNA1BP2, EEF1D, EGR2, EIF2AK2, EIF3B, EIF3E, EIF3I, EIF4E, ERBB4, ERRFI1, ETV1, ETV6, EZH2, F2R, F2RL1, FGF1…	190		Cell Death and Survival	cell death	cell death of phagocytes	7.51e-21	ABCC4, ABCG1, ADAM17, AHR, ANPEP, ANXA1, APOE, ATF3, BAX, BCL2A1, BCL2L11, BID, BIRC2, BIRC3, BIRC5, BTG1, BTK, C1QA, CASP1, CASP3, CASP4, CASP6, CASP7, CASP8, CCL19, CCL2, CCL21, CCL5, CCR7, CD14, CD40, CD44, CD5L, CDKN1A, CDKN1B, CDKN2A, CNR1, CNR2, CTSB, CXCL2, CXCR4, CYBB, DLL1, EIF2AK2, FADD, FASLG, FCER1A, FCER1G, FOS, GPR132, GSN, HAVCR2, HIF1A, HMOX1, IFNAR1, IL10, IL11, IL12A, IL18, IL1B…	113		Hematological System Development and Function	quantity	quantity of granulocytes	9.14e-25	ADA, ADAM17, ADIPOQ, AHR, ARNTL, BCL2L11, BCL6, BID, C1QA, C3, C5AR1, C5AR2, C6, Ccl2, CCL2, CCL22, CCL3L3, CCR4, CCR6, CD101, CD1D, CD200R1, CD300A, CD40, CD8A, CD97, CDKN1A, CERK, CFH, CISH, CLEC11A, CLEC4E, CLEC7A, CNR2, CSF1R, CSF3R, CTSE, CXCL6, CYBB, CYP1A1, DOK1, ESR2, F2RL1, FASLG, FCGR1A, FCGR2A, FCGR2B, FES, FUT4, FUT7, FZD9, GADD45A, GPR132, GRK6, GSN, HDC, ICAM1, IL13RA1, IL17RA, IL18…	134		Hematological System Development and Function	quantity	quantity of hematopoietic progenitor cells	2.08e-31	ABCB1, Abcb1b, AHR, ALOX15, APOE, ARNTL, ATM, BBC3, BCL11B, BCL2L11, BIRC5, BLNK, BMF, BTK, CASP8, CBFB, CCR6, CCR7, CCR9, CD180, CD244, CD247, CD28, CD3E, CD3G, CD4, CD40, CD44, CD5, CD5L, CD69, CD7, CD72, CD80, CD86, CD8A, CD8B, CDH17, CDKN2A, CIB1, CORO1A, CSF3R, CTSD, CTSE, CXCR4, DCLRE1C, DLK1, DNASE2, DOK1, DOK2, DYRK3, EIF2AK2, EPB42, EPHA4, ESR2, FCER1G, FCGR2B, FES, FGF4, FLT3, FOS, FOSB…	161
Cellular Growth and Proliferation	proliferation	proliferation of fibroblasts	2.09e-16	ACTB, ADIPOQ, AEBP1, AGT, AHR, AIF1, AIMP1, ANXA2, AQP1, ARID3A, ATM, B4GALT7, BAX, BMP2, BMP4, BRCA1, BRCA2, BTC, BUB1, CASR, CBX7, CCL2, CCL24, CCNA2, CCNB1, CCND1, CCNE1, CCNF, CD300A, CD40, CD44, CDH1, CDK2, CDK4, CDKN1A, CDKN1B, CEBPB, COL14A1, CSF1R, CTSD, CXCL3, DCN, DDR2, DKK3, DOK1, DPH1, E2F1, ELN, ENG, ESPL1, ESR1, EZH2, FADD, FANCD2, FAS, FEN1, FGF1, FGF10, FGF4, FNTB, FOS, FOSB, FOSL…	160		Cell Death and Survival	cell death	cell death of epithelial cells	8.41e-20	ABCG2, ACE, ADIPOQ, ADRBK1, AHR, AIFM1, AIFM3, ALDH1A1, ALDH3A1, ALDH3B1, ALOX15, APAF1, APOBEC3B, AR, ATF3, ATG7, ATM, ATP13A2, ATP2B2, AURKA, BAX, BCL2A1, BCL2L11, BID, BIRC2, BIRC3, BIRC5, BMF, BMP4, BMP6, BNIP3, CA3, CASP1, CASP3, CASP4, CASP7, CASP8, CBS/CBSL, CCHCR1, CCK, CCND1, CD1D, CD4, CD40, CD44, CDH1, CDKN1A, CDKN1B, CDKN2A, CEBPA, CHEK1, CIT, Clca3a1/Clca3a2, CRYAA/LOC102724652, CRYA…	224		Hematological System Development and Function	quantity	quantity of B lymphocytes	5.12e-24	AHR, APOE, ARNTL, ATM, B3GNT5, BACH2, BANK1, BCL2A1, BCL2L11, BCL3, BLK, BLNK, BMF, BST1, BTK, C3, CASP8, CCR6, CCR7, CCR9, CD180, CD27, CD28, CD40, CD69, CD72, CD80, CD84, CDH17, CDKN1A, CDKN2B, Cmah, CNR2, CXCR4, DAPP1, DCLRE1C, DLK1, DOCK8, ESR1, ESR2, FCER1G, FCGR1A, FCGR2A, FCGR2B, FCMR, FES, FLT3, FOS, FZD9, H2AFX, HCLS1, HGF, ICOS, IGF2, IKZF3, IL17C, IL18, IL1RL1, IL21R, IL2RB, IL2RG, IL6…	141		Hematological System Development and Function	quantity	quantity of CD4+ T-lymphocytes	2.24e-31	ANPEP, APOE, ATM, BATF, BCL2L11, BMF, Ccl2, CCL5, CCR6, CCR7, CD247, CD274, CD28, CD3D, CD4, CD40, CD5, CD69, CD74, CD83, CD84, CD8A, CDKN2A, CORO1A, CTSV, CXCL10, DCLRE1C, DOCK8, ESR2, GPR83, HLA-A, HLA-DQA1, HLA-DQB1, ICOS, IL10, IL13RA1, IL17RA, IL21R, IL2RB, IL2RG, IRF1, ITGAD, ITGAM, ITGB2, ITGB7, ITK, JAK3, LAG3, LAIR1, LAT, LCK, LCP2, Mt1, NOD2, NPY1R, PIK3CD, PLA2G2D, PRF1, PRKCQ, PTPN6, …	79
Cellular Growth and Proliferation	proliferation	proliferation of B lymphocytes	9.3e-13	ADA, ARHGDIA, ARHGDIB, ATM, B3GNT5, BANK1, BCL11A, BCL2A1, BCL2L11, BCL3, BLNK, BTK, CASP3, CASP8, CD14, CD180, CD19, CD22, CD244, Cd24a, CD300A, CD300C, CD38, CD40, CD44, CD80, CD86, CD8A, CDKN1A, CDKN1B, CEBPB, CLCF1, Cmah, DAPP1, DCLRE1C, DOK1, EGR2, EXTL1, EZR, FADD, FAS, FCER2, FCGR2B, FCGR3A/FCGR3B, FLT3, GAPT, HCK, HIF1A, HSH2D, HSPD1, IFNAR1, IKZF3, IL10, IL13RA1, IL17C, IL18, IL1B, IL1RN…	130		Cell Death and Survival	cell death	cell death of connective tissue cells	3.18e-17	A4GALT, ABCB1, ABCC4, ABCG2, ACTB, ADIPOQ, ADM, ADRBK1, AGT, AHR, AIFM1, APAF1, APLN, AR, ARRB2, ATF3, ATF5, ATG7, ATM, ATN1, ATP6AP2, BAX, BCL2A1, BCL2L11, BID, BIRC2, BIRC3, BIRC5, BMF, BMP4, BNIP3, BRCA1, BRCA2, BUB1, CA3, CA4, CASP1, CASP3, CASP4, CASP7, CASP8, CASP8AP2, Ccl9, CCNB1, CCND1, CCNE1, CD1D, CD2, CD300LD, CD40, CD44, CDC20, CDH1, CDK1, CDK4, CDKN1A, CDKN1B, Cdkn1c, CDKN2A, CDKN2C,…	254		Hematological System Development and Function	quantity	quantity of antigen presenting cells	6.45e-23	ABCA1, ADA, ADIPOQ, AGT, APOE, BATF3, BCL11A, BCL2L11, BCL3, BDNF, BID, BIRC3, C5AR1, CCL19, Ccl2, CCL2, CCL21, CCL22, Ccl9, CCR4, CCR6, CCR7, CD200R1, CD40, CD83, CDKN2B, CES1, CIITA, CLEC4D, CLEC4E, CSF1R, CTSS, CTSV, CX3CR1, CXCL10, CXCL14, CXCR6, DDR1, DOCK8, F2RL1, FCER1G, FCGR2B, FGF7, FLT3, GHR, GPR132, GPR68, GREM1, HAVCR2, HCK, HSD11B1, IL11, IL12RB2, IL18, IL1A, IL1B, IL1R1, IL1RL1, IL1…	116		Hematological System Development and Function	quantity	quantity of myeloid cells	3.68e-29	ADA, ADAM17, ADGRE5, ADIPOQ, AHR, ALOX15, APOE, ARNTL, B4GALT1, BCL2L11, BDNF, BID, C1QA, C3, C4A/C4B, C5AR1, C5AR2, C6, CASP8, CCL2, Ccl2, CCL22, CCL3L3, CCR6, CD101, CD1D, CD200R1, CD300A, CD40, CD8A, CEBPE, CERK, CFH, CISH, CLEC4E, CLEC7A, CNR2, CSF1R, CSF3R, CTSE, CXCR4, CYBB, CYP1A1, DOK1, DOK2, ESR2, F2RL1, FCGR1A, FCGR2A, FCGR2B, FES, FUT7, FZD9, GADD45A, GPR132, GRK6, GSN, HAVCR2, ICAM1, …	132
Cellular Growth and Proliferation	proliferation	proliferation of tumor cells	1.12e-12	ABCC4, ACVR1C, ADCYAP1R1, ADIPOQ, ADRBK1, AGT, AHCY, ANXA1, ANXA2, AREG, ATG7, ATM, BAG1, BCAN, BIRC5, BMP2, BMP4, BTC, BTK, CA12, CA9, CACYBP, CASP1, CASP3, CASR, CCND1, CCNE1, CD40, CD44, CD82, CDH1, CDK2, CDK4, CDKN1A, CDKN1B, CHEK1, CLDN4, CNKSR1, COL4A3, CSF1R, CSF2RA, CSF3R, CST3, CTNND2, CTSB, CTSS, CTSV, CXCL11, CXCL3, CXCR2, CXCR4, DACT2, DCN, DUS2, EIF2B1, EIF4EBP1, ESR1, ESR2, EZH2, EZ…	197		Cell Death and Survival	cell death	neuronal cell death	5.82e-16	A2M, AATK, ADA, ADARB1, ADORA1, ADRBK1, AGT, AIFM1, ALOX12, ALOX15, AMIGO2, ANGPT1, APAF1, APLN, APOE, AR, ARTN, ASTN1, ATF3, ATG12, ATG7, ATM, ATN1, ATP13A2, ATP1A2, BACE1, BAG1, BAX, BCL11B, BCL2L11, BDNF, BID, BIRC5, BMP4, BNIP3, C5AR1, CAMK4, CASP1, CASP3, CASP6, CASP7, CASP8, CCL2, Ccl2, CCL3L3, CCL4, CCL5, CD4, CDC25A, CDK1, CDK2, CDK4, CDK5, CDK5R1, CDKN1A, CDKN1B, CDKN2A, CHEK1, CHEK2, CI…	284		Hematological System Development and Function	quantity	quantity of CD4+ T-lymphocytes	1.86e-22	ANPEP, APOE, ATM, BATF, BCL2L11, BMF, Ccl2, CCL5, CCR6, CCR7, CD247, CD28, CD3D, CD4, CD40, CD5, CD69, CD83, CD84, CD8A, CDKN2A, CIITA, CORO1A, CTSV, CXCL10, DCLRE1C, DOCK8, ENTPD7, ESR1, ESR2, GPR83, GRAP, HLA-A, ICOS, IL13RA1, IL17RA, IL21R, IL2RB, IL2RG, IRF1, ITGAM, ITGB2, ITGB7, ITK, JAK3, LAG3, LAIR1, LAT, LCK, LCP2, MMP19, Mt1, NOD2, NPY1R, PIK3CD, PRF1, PRKCQ, PTPN2, PTPN6, PTPRC, RASGRP1…	78		Hematological System Development and Function	quantity	quantity of granulocytes	5.72e-29	ADA, ADAM17, ADGRE5, ADIPOQ, AHR, ALOX15, ARNTL, B4GALT1, BCL2L11, BID, C1QA, C3, C4A/C4B, C5AR1, C5AR2, C6, Ccl2, CCL2, CCL22, CCL3L3, CCR6, CD101, CD1D, CD200R1, CD300A, CD40, CD8A, CEBPE, CERK, CFH, CISH, CLEC4E, CLEC7A, CNR2, CSF1R, CSF3R, CTSE, CYBB, CYP1A1, DOK1, DOK2, ESR2, F2RL1, FCGR1A, FCGR2A, FCGR2B, FES, FUT7, FZD9, GADD45A, GPR132, GRK6, GSN, ICAM1, IL10, IL13RA1, IL17RA, IL18, IL18B…	121
Cellular Growth and Proliferation	proliferation	proliferation of muscle cells	4.61e-12	ABCC2, ABCC4, ACE2, ADAM17, ADIPOQ, ADRBK1, AGT, AIF1, ALOX5AP, APOE, ARG1, BIRC5, BMP10, BMP2, BMP4, C1QTNF9B, CACNA1G, CCL2, CCND1, CCNE1, CDK2, CDK4, CDKN1A, CDKN1B, Cdkn1c, CKLF, COMT, CTSB, CXCL10, CXCL16, CYBA, DDR1, DPP4, E2F1, E2F3, ELN, ESR1, ESR2, FCER2, FGF1, FGF16, FOS, FOXM1, FOXO1, GATA6, GJA1, GNAI1, GPX1, HAS2, HGF, HIF1A, HMGCR, HMOX1, HOPX, HSPD1, HTR2B, IGF2, IGFBP2, IGFBP3, IG…	155		Cell Death and Survival	cell death	cell death of antigen presenting cells	1.95e-15	ABCC4, ABCG1, APOE, BAX, BCL2L11, BIRC2, BIRC3, BIRC5, BTG1, C1QA, CASP1, CASP3, CASP4, CASP6, CASP7, CASP8, CCL19, CCL21, CCL5, CCR7, CD14, CD40, CD5L, CDKN1A, CDKN1B, CDKN2A, CNR1, CNR2, CTSB, EIF2AK2, FADD, FASLG, FOS, GPR132, HIF1A, HMOX1, IFNAR1, IL10, IL11, IL18, IL1B, IL21, INPP5D, IRF1, IRF5, ISG15, LCN2, LDLR, LEP, LGALS3, LYZ, MSR1, MYD88, NGF, NLRP3, NR4A1, OSCAR, PARP1, PCTP, PF4, PIK…	83		Hematological System Development and Function	quantity	quantity of thymocytes	2.66e-20	ABCB1, Abcb1b, AHR, ATM, BCL11A, BCL11B, BCL2L11, BMF, CASP3, CBFB, CCNB2, CCR6, CCR7, CCR9, CD244, CD247, CD3E, CD3G, CD4, CD5, CD5L, CD7, CD80, CD86, CD8A, CD8B, CDKN2A, CIITA, CORO1A, CTSD, CTSE, CXCR4, DCLRE1C, DNASE2, DOK1, ESR1, ESR2, FADD, FCER1G, FCGR2B, FOS, FOSB, FOXO1, FYB, GADD45A, IL2RB, IL2RG, IL6, IL7R, INPP5D, Ins1, IRF1, ITGB2, ITK, ITPKB, JAK3, LAG3, LAIR1, LAT, LCK, LCP2, LEP, …	101		Hematological System Development and Function	quantity	quantity of thymocytes	2.94e-23	ABCB1, Abcb1b, AHR, ATM, BBC3, BCL11B, BCL2L11, BMF, CBFB, CCR6, CCR7, CCR9, CD244, CD247, CD3E, CD3G, CD4, CD5, CD5L, CD7, CD80, CD86, CD8A, CD8B, CDKN2A, CORO1A, CTSD, CTSE, CXCR4, DCLRE1C, DNASE2, DOK1, EPHA4, ESR2, FCER1G, FCGR2B, FOS, FOSB, FYB, GADD45A, HLA-DQB1, IL12B, IL2RB, IL2RG, IL7R, INPP5D, IRF1, ITGB2, ITK, JAK3, LAG3, LAIR1, LAT, LCK, LCP2, LEP, LIF, LY9, MAPK3, MYH11, NOD2, NOS2, …	91
Cellular Growth and Proliferation	colony formation	colony formation	1.41e-17	ADAM17, ADIPOQ, AIFM1, ALDH1A1, ALDH3A1, ANKRD1, ANXA1, ANXA7, ATF1, ATG7, ATIC, BAG1, BCL2L11, BIRC5, C1QBP, CAMP, CASP1, CCL2, CCL24, CCL3L3, CCL4, CCNB1, CCND1, CCNE1, CCR7, CCR9, CD19, CD44, CD82, CD9, CDCA7, CDCA7L, CDKN1A, CDKN1B, CHEK1, CLCA2, Clca3a1/Clca3a2, CLDN4, CLEC11A, CRTC1, CSF1R, CSF2RA, CSF2RB, CSF3R, CTSB, CTSD, CXCL10, CXCL3, DCK, DCN, DHFR, DOK2, DPH1, DYRK3, E2F1, EIF2AK2, E…	229		Cell Death and Survival	cell death	cell death of tumor	5.98e-15	ADIPOQ, AIFM1, ANPEP, ANXA1, ANXA2, APAF1, AR, ATG7, ATM, ATP7B, B2M, BAG1, BAX, BCL2L11, BDNF, BID, BIRC2, BIRC3, BIRC5, BLNK, BMP4, BMP5, BMP6, BRCA1, BTG1, BTK, C1QTNF4, CA9, CASP1, CASP3, CASP6, CASP8, CAV1, CD22, CD38, CD40, CD44, CDC45, CDC6, CDH1, CDH11, CDK1, CDK2, CDKN1A, CDKN1B, CDKN2A, CHEK1, COL18A1, CRYAB, CSF3R, CTLA4, CTSB, CXCL11, CXCR4, CYCS, DHCR7, E2F1, EGLN3, EIF2AK2, EMP2, EN…	167		Hematological System Development and Function	quantity	quantity of neutrophils	1.29e-19	ADA, ADAM17, ADIPOQ, AHR, ARNTL, C1QA, C3, C5AR1, C5AR2, C6, Ccl2, CCL2, CCL3L3, CCR4, CD1D, CD300A, CD40, CERK, CFH, CLEC4E, CLEC7A, CNR2, CSF3R, CYBB, CYP1A1, DOK1, ESR2, F2RL1, FASLG, FCGR1A, FCGR2A, FCGR2B, FES, FUT4, FUT7, FZD9, GPR132, GSN, HDC, ICAM1, IL17RA, IL18, IL18BP, IL1A, IL1B, IL1R1, IL2RB, IL2RG, IL6, INPP5D, IRF6, ITGAL, ITGAM, ITGB2, JAK3, KERA, LCN2, LEP, LYN, MDK, MMP12, MMP13…	97		Hematological System Development and Function	quantity	quantity of neutrophils	7.92e-23	ADA, ADAM17, ADIPOQ, AHR, ARNTL, B4GALT1, C1QA, C3, C4A/C4B, C5AR1, C5AR2, C6, Ccl2, CCL2, CCL3L3, CD1D, CD300A, CD40, CERK, CFH, CLEC4E, CLEC7A, CNR2, CSF3R, CYBB, CYP1A1, DOK1, DOK2, ESR2, F2RL1, FCGR1A, FCGR2A, FCGR2B, FES, FUT7, FZD9, GPR132, GSN, ICAM1, IL10, IL17RA, IL18, IL18BP, IL1A, IL1B, IL1R1, IL2RB, IL2RG, INPP5D, IRF6, ITGAL, ITGAM, ITGB2, JAK3, LCN2, LEP, LYN, MMP12, MMP3, MMP8, MMP…	88
Cellular Growth and Proliferation	colony formation	colony formation of cells	6.06e-15	ADAM17, ADIPOQ, AIFM1, ALDH1A1, ALDH3A1, ANKRD1, ANXA1, ANXA7, ATF1, ATG7, ATIC, BAG1, BCL2L11, BIRC5, C1QBP, CAMP, CASP1, CCL2, CCL24, CCL3L3, CCL4, CCND1, CCNE1, CD19, CD44, CD82, CD9, CDCA7, CDCA7L, CDKN1A, CDKN1B, CHEK1, CLCA2, Clca3a1/Clca3a2, CLDN4, CLEC11A, CRTC1, CSF1R, CSF2RA, CSF2RB, CSF3R, CTSB, CTSD, CXCL3, DCK, DCN, DHFR, DOK2, DPH1, DYRK3, E2F1, EIF2AK2, EIF4EBP1, ENO1, EPCAM, ERBB4…	207		Cell Death and Survival	cell death	cell death of cervical cancer cell lines	2.15e-14	A4GALT, ABCB1, ACER2, ACSM5, AIFM1, ARHGAP4, ARSB, ATG7, ATN1, ATP2A1, AURKB, BAG1, BAX, BAZ1A, BCL2A1, BCL2L11, BID, BIRC2, BIRC5, BUB1, CASC5, CASP1, CASP3, CASP4, CASP8, CASP8AP2, CCNB1, CCT4, CDC20, CDC6, CDC7, CDCA2, CDK1, CDKN1A, CDKN1B, CDKN2A, CDKN2C, CEBPA, CHEK1, CIB1, COX5A, CSF1R, CSNK2A2, CTSB, CYBA, DAP3, E2F1, EIF2AK2, ESR1, EZR, FADD, FAIM2, FASLG, FHIT, FOS, G0S2, GADD45A, GPR132…	150		Hematological System Development and Function	quantity	quantity of macrophages	5.57e-15	ABCA1, ADA, ADIPOQ, AGT, APOE, BCL2L11, BCL3, BID, BIRC3, C5AR1, Ccl2, CCL2, CCL22, CCR4, CCR6, CD200R1, CD40, CES1, CSF1R, CTSS, CTSV, CX3CR1, CXCL10, CXCL14, CXCR6, DDR1, FGF7, GHR, GPR132, GPR68, GREM1, HAVCR2, HCK, HSD11B1, IL11, IL12RB2, IL18, IL1A, IL1B, IL1R1, IL1RL1, IL2RG, IRF8, ITGB2, JAK2, LCN2, LEPR, LGALS3, LIF, LILRB4, LIPG, LSP1, LTC4S, MDK, MIF, MMP12, MMP3, MMP9, MPZ, Mt1, NOS1, …	78		Hematological System Development and Function	quantity	quantity of macrophages	6.93e-21	ABCA1, ADA, ADIPOQ, AGT, APOB, APOE, BCL2L11, BID, BIRC3, C4A/C4B, C5AR1, CCL2, Ccl2, CCL22, CCR6, CD200R1, CD40, CES1, CSF1R, CTSS, CTSV, CX3CR1, CXCL10, CXCR6, DDR1, GPR132, GPR68, GREM1, HAVCR2, HBEGF, HCK, HSD11B1, IL10, IL12B, IL12RB2, IL18, IL1A, IL1B, IL1R1, IL2RG, IRF8, ITGAD, ITGB2, JAK2, LCN2, LGALS3, LIF, LILRB4, LIPG, LSP1, MMP12, MMP3, MMP9, MPZ, Mt1, NOS1, NPY, PLA2G15, PRF1, PTGER2…	76
Cellular Growth and Proliferation	stimulation	stimulation of cells	1.37e-13	ADORA1, AGT, APP, BMP2, BMP4, BMP6, C3, C5AR1, CAMP, CCL2, CCL20, CCL21, CCL22, CCL24, CCNA2, CCND1, CD19, CD1D, CD2, CD209, Cd24a, CD274, CD40, CD5, CD80, CD82, CD83, CD86, CD8A, CLEC11A, CLEC4E, CNTF, CXCL10, CXCL11, CXCL13, CXCL3, CYCS, DIAPH1, DPP4, DRD1, ENPP3, FAAH, FAS, FGD3, FOS, GAL, GDNF, Gm21596/Hmgb1, HAVCR2, HCN1, HGF, HLA-G, HMOX1, HSPD1, HTR2A, ICOS, IGF2, IGFBP3, IL10, IL11, IL18,…	136		Cell Death and Survival	cell death	cell death of macrophages	2.2e-14	ABCC4, ABCG1, APOE, BIRC2, BIRC3, BIRC5, BTG1, C1QA, CASP1, CASP3, CASP4, CASP6, CASP7, CASP8, CCL5, CD14, CD40, CD5L, CDKN1A, CDKN2A, CTSB, EIF2AK2, FADD, FASLG, FOS, GPR132, HIF1A, HMOX1, IFNAR1, IL10, IL18, IL1B, INPP5D, IRF1, ISG15, LCN2, LDLR, LGALS3, LYZ, MSR1, MYD88, NGF, NLRP3, NR4A1, PARP1, PCTP, PIK3AP1, PLA2G4A, PLA2G6, PON1, PPARG, PTPN6, PYCARD, RAN, RIPK1, RIPK3, SERPINF1, SOAT1, ST…	67		Hematological System Development and Function	quantity	quantity of CD8+ T lymphocyte	1.2e-13	ATM, BATF, BCL11A, BCL11B, BCL2L11, BMF, CCR4, CCR6, CD247, CD28, CD3D, CD4, CD5, CD8A, CD8B, CDKN2A, CIITA, CORO1A, CXCL10, DCLRE1C, DOCK8, ESR1, ESR2, HLA-A, IL2RB, IL2RG, IRF1, ITGAM, ITGB2, ITK, JAK3, LAG3, LAIR1, LCK, LCP2, MMP19, MPZL2, Mt1, NDST3, NPY1R, P2RX5, PIK3CD, PRF1, PRKCQ, PSMB10, PSMB8, PSMB9, PTPN6, PTPRC, RASGRP1, RHOH, SIGLEC1, SPI1, ST8SIA1, TAP1, TNF, TXK, VAV1, VAV2, ZBTB7B	60		Hematological System Development and Function	quantity	quantity of CD8+ T lymphocyte	2e-19	ATM, BATF, BBC3, BCL11B, BCL2L11, BMF, CCR6, CD247, CD274, CD28, CD3D, CD4, CD5, CD74, CD8A, CD8B, CDKN2A, CORO1A, CXCL10, DCLRE1C, DOCK8, ESR2, HLA-A, HLA-DQA1, HLA-DQB1, IL2RB, IL2RG, IRF1, ITGAD, ITGAM, ITGB2, ITK, JAK3, LAG3, LAIR1, LCK, LCP2, Mt1, NPY1R, PIK3CD, PRF1, PRKCQ, PSMB10, PSMB8, PSMB9, PTPN6, PTPRC, RASGRP1, RHOH, SIGLEC1, SIT1, SPI1, ST8SIA1, TAP1, TAPBP, TNF, TXK, VAV1, VAV2, ZB…	60
Cellular Growth and Proliferation	inhibition	inhibition of cells	4.92e-13	AHR, AMH, ANXA1, APP, C1QBP, CAMP, CCL4, CD19, CD244, CD274, CD40, CD80, CD82, CD86, CSF3R, CXCL10, CXCL14, DDIT4, ENTPD1, FCGR2B, FGF1, FGF4, FKBP5, FOXM1, FOXP3, GATA3, GSN, HAVCR2, HIF1A, HK2, HLA-A, HLA-E, HLA-G, HPSE, IL10, IL18, IL1RN, IL6, IL6R, ITGA4, ITGA5, ITGB2, LEP, LEPR, LPAR2, MAP2K4, MGLL, MKNK1, NCR3, NPY, NRG1, OSM, PF4, PIM1, RAPGEF3, RUNX3, SDC1, SELE, SERPINE1, SLC12A2, TBK1, …	75		Cell Death and Survival	cell death	cell death of leukemia cell lines	3.23e-14	ABCB1, ABCB4, AHR, AIFM1, APAF1, ARG1, B2M, BAX, BCL2A1, BCL2L11, BID, BIRC2, BIRC3, BIRC5, BTG1, C5AR1, CASP3, CASP8, CAV1, CCND1, CD247, CD28, CD4, CD55, CD7, CDC6, CDH1, CDKN1A, CDKN1B, CDKN2A, CEBPA, COL1A1, CSF2RA, CSF2RB, CTSB, CTSD, CXCR4, CYCS, E2F1, EPHB6, ESR1, FADD, FANCA, FASLG, FCER1A, FCGR1A, FCMR, FGR, FKBP5, FTH1, GATA1, GLO1, GSN, GSTA2, GZMB, GZMK, HCK, HCLS1, HCST, HGF, HMOX1, …	139		Hematological System Development and Function	quantity	quantity of regulatory T lymphocytes	2.81e-13	ADIPOQ, BATF, BCL2L11, CAMK4, CCL19, CCL21, CCL4, CCL5, CD1D, CD27, CD28, CD5, CD80, CD86, CTSV, CXCR3, EBI3, FABP5, FASLG, FCGR2B, FLT3, ICOS, IL2RB, IL7R, ITGB2, ITGB8, Klrk1, LEP, LEPR, LTB, MDK, MIF, PDCD1, PRKCQ, PTAFR, PTPN22, SELE, SELL, SELP, SELPLG, TGFBR1, THBS1, TLR2, TLR9, TNF, TNFRSF1B, TNFSF15, WAS, XCL1	49		Hematological System Development and Function	quantity	quantity of dendritic cells	2.1e-19	ADA, BATF3, C5AR1, CCL19, Ccl2, CCL2, CCL21, Ccl9, CCR6, CCR7, CD83, CLEC4D, CLEC4E, CSF1R, CXCL13, DOCK8, F2RL1, FCER1G, FCGR2B, FLT3, HBEGF, IL10, IL12RB2, IL18, IL1RN, IL2RG, IL7R, INPP5D, IRF1, IRF4, IRF8, ITGB2, JAK3, LAIR1, LTB, MMP9, NLRP10, PLA2G2D, PTPN6, SELL, SFTPA1, SIRPA, SOCS1, SPI1, SPIB, SPP1, SPPL2A, TGFBR1, TLR2, TLR4, TNF, TNFSF11, TYROBP, XCL1	54
Cellular Growth and Proliferation	inhibition	inhibition of leukocytes	3.16e-12	AHR, ANXA1, C1QBP, CD19, CD244, CD274, CD80, CD86, ENTPD1, FCGR2B, FKBP5, FOXP3, GATA3, GSN, HAVCR2, HIF1A, HLA-A, HLA-E, HLA-G, HPSE, IL10, IL6, IL6R, ITGA4, ITGA5, ITGB2, LEP, LEPR, LPAR2, MKNK1, NCR3, PF4, PIM1, RAPGEF3, SELE, TBX21, TGFB1, TLR4, TLR9, TNF, TNFRSF18, TNFRSF4, TNFSF10, TNFSF15, UXT, VTCN1, XDH	47		Cell Death and Survival	cell death	cell death of tumor cells	7.14e-14	ADIPOQ, AIFM1, ANPEP, ANXA1, ANXA2, APAF1, AR, ATG7, ATM, ATP7B, B2M, BAG1, BAX, BCL2L11, BDNF, BID, BIRC2, BIRC3, BIRC5, BLNK, BMP4, BMP5, BMP6, BRCA1, BTK, C1QTNF4, CA9, CASP1, CASP3, CASP6, CASP8, CAV1, CD22, CD38, CD40, CD44, CDC45, CDC6, CDH1, CDH11, CDK1, CDK2, CDKN1A, CDKN1B, CDKN2A, CHEK1, COL18A1, CTLA4, CTSB, CXCL11, CXCR4, CYCS, DHCR7, E2F1, EGLN3, EIF2AK2, EMP2, ENO1, EZH2, FADD, FASL…	160		Hematological System Development and Function	quantity	quantity of double-positive thymocyte	1.4e-12	ABCB1, Abcb1b, ATM, BCL11B, BCL2L11, CCR6, CCR9, CD247, CD3E, CD4, CD5, CD7, CD80, CD86, CD8A, CDKN2A, CIITA, CTSD, CTSE, CXCR4, DCLRE1C, DNASE2, ESR1, ESR2, FOS, IL2RB, IL2RG, IL7R, IRF1, ITGB2, ITK, ITPKB, LAT, LCK, LCP2, MMP19, PIK3CD, PRKCQ, PTPN2, PTPRC, RHOH, RUNX1, SASH3, SPI1, ST14, VAV1, VAV3, WAS, ZAP70	49		Hematological System Development and Function	quantity	quantity of regulatory T lymphocytes	7.08e-16	ADIPOQ, BATF, BCL2L11, CCL19, CCL21, CCL4, CCL5, CD1D, CD27, CD28, CD5, CD80, CD86, CTSV, CXCR3, EBI3, FCGR2B, FLT3, ICOS, IL10, IL12B, IL2RB, IL7R, ITGB2, ITGB8, Klrk1, LEP, LTB, PDCD1, PRKCQ, PTAFR, PTPN22, SELE, SELL, SELP, SELPLG, SFTPA1, TGFBR1, THBS1, TLR2, TLR9, TNF, TNFRSF1B, TNFSF15, WAS, XCL1	46
Cellular Growth and Proliferation	expansion	expansion of T lymphocytes	7.28e-13	AHR, C3, C5AR1, CASP8, CCR6, CCR7, CD2, CD209, CD244, Cd24a, CD27, CD274, CD40, CD80, CD86, CDKN1B, CTSD, CXCR3, DEF6, DOK1, FAS, FOXO3, FOXP3, HAVCR2, HSPA8, HSPD1, ICOS, IFNAR1, IL10, IL18, IL1B, IL21R, IL4R, IL6, IL6R, IL7R, IRF1, JAK3, Klrk1, LCP1, LCP2, LEP, LEPR, LY9, MDK, MYC, MYD88, NFATC2, NOS1, PARP1, PIK3CB, PIK3CD, PIM1, PLP1, PRF1, RUVBL2, SERPINB9, SHH, SPI1, Srgn, STAT3, STAT4, SYK…	75		Cell Death and Survival	necrosis	necrosis	1.26e-64	A2M, A4GALT, AATK, ABCB1, ABCB4, ABCC4, ABCC8, ABCC9, ABCG1, ABCG2, ACACA, ACE, ACER2, ACKR3, ACSM5, ACTB, ACTL6A, ACVR1C, ADA, ADAM17, ADARB1, ADCY6, ADIPOQ, ADM, ADORA1, ADRA1A, ADRA1D, ADRB1, ADRBK1, AGR2, AGT, AHR, AIFM1, AIFM3, AKR1B1, ALCAM, ALDH1A1, ALDH1L1, ALDH3A1, ALDH3B1, ALKBH3, ALOX12, ALOX15, AMIGO2, ANGPT1, ANPEP, ANXA1, ANXA2, APAF1, APEX1, APLN, APOBEC3B, Apoc3, APOE, APRT, AQP7,…	1110		Hematological System Development and Function	cell movement	cell movement of leukocytes	2.18e-52	ABCA1, Abcb1b, ABCB4, ACKR2, ADA, ADAM17, ADIPOQ, ADORA1, AGT, AIF1, ALCAM, ANGPT1, ANXA1, AOC3, APOE, ARG1, BACH2, BATF, BCL11B, BDKRB1, BID, BTK, C2, C3, C5AR1, C5AR2, C6, CAPG, CASP1, CBFB, CCL17, CCL19, CCL2, Ccl2, CCL21, CCL22, CCL3L3, CCL4, CCL5, Ccl6, Ccl9, CCND1, CCR4, CCR6, CCR7, CCR9, CD14, CD1D, CD2, CD226, CD247, CD28, CD3E, CD4, CD40, CD44, CD63, CD69, CD80, CD86, CD8A, CD9, CDH1, CD…	335		Hematological System Development and Function	quantity	quantity of double-positive thymocyte	1.81e-14	ABCB1, Abcb1b, ATM, BCL11B, BCL2L11, CCR6, CCR9, CD247, CD3E, CD4, CD5, CD7, CD80, CD86, CD8A, CDKN2A, CTSD, CTSE, CXCR4, DCLRE1C, DNASE2, ESR2, FOS, IL2RB, IL2RG, IL7R, IRF1, ITGB2, ITK, LAT, LCK, LCP2, PIK3CD, PRKCQ, PTPRC, RHOH, RUNX1, SASH3, SIT1, SPI1, ST14, VAV1, VAV3, WAS, ZAP70	45
Cellular Growth and Proliferation	expansion	expansion of cells	1.06e-12	ABCB1, AHR, AICDA, AREG, ATG7, ATM, BCL3, BIRC5, BMP4, BTC, BTK, C3, C5AR1, CASP8, CCND1, CCR6, CCR7, CD163, CD180, CD2, CD209, CD244, Cd24a, CD27, CD274, CD40, CD80, CD86, CDH1, CDKN1A, CDKN1B, CEBPB, CLCN3, CMKLR1, CSF1R, CSF2RB, CTSD, CXCR3, DEF6, DOK1, FAS, FCGR2B, FLT3, FOXO3, FOXP3, GFI1B, GJA1, HAVCR2, HIF1A, HMOX1, HSPA8, HSPD1, ICOS, IFNAR1, IL10, IL10RA, IL18, IL1B, IL21R, IL4R, IL6, IL…	133		Cell Death and Survival	necrosis	necrosis of epithelial tissue	2.65e-21	ABCG2, ACE, ADAM17, ADIPOQ, ADM, ADRBK1, AGT, AHR, AIFM1, AIFM3, ALDH1A1, ALDH3A1, ALDH3B1, ALOX15, ANGPT1, APAF1, APLN, APOBEC3B, AR, ARG2, ARHGAP18, ATF3, ATG7, ATM, ATP13A2, ATP2B2, AURKA, BAX, BCL2A1, BCL2L11, BDNF, BID, BIRC2, BIRC3, BIRC5, BMF, BMP4, BMP6, BNIP3, CA3, CASP1, CASP3, CASP4, CASP7, CASP8, CAV1, CBS/CBSL, CCHCR1, CCK, CCND1, CD1D, CD4, CD40, CD44, CDH1, CDKN1A, CDKN1B, CDKN2A, …	264		Hematological System Development and Function	cell movement	cell movement of myeloid cells	2.54e-38	ABCA1, ADAM17, ADIPOQ, ADORA1, AGT, AIF1, ANGPT1, ANXA1, AOC3, APOE, ARG1, BID, BTK, C2, C3, C5AR1, C5AR2, C6, CAPG, CASP1, CBFB, CCL17, CCL19, CCL2, Ccl2, CCL21, CCL22, CCL3L3, CCL4, CCL5, CCND1, CCR6, CCR7, CD14, CD2, CD28, CD4, CD44, CD69, CD9, CDKN1A, CES1, CFH, CFTR, CKLF, CLEC11A, CMA1, CNR1, CNR2, COL1A1, COL4A3, CORO1A, CRYAB, CSF1R, CSF2RA, CSF3R, CST3, CTSB, CTSE, CTSS, CTSV, CX3CR1, CX…	234		Hematological System Development and Function	quantity	quantity of follicular B lymphocytes	8.32e-14	APOE, ARNTL, BCL2A1, BCL2L11, BLNK, BMF, CD180, CD274, CD40, CD72, CD74, CD80, CD84, CDH17, Cmah, CNR2, DLK1, DOCK8, FCMR, GAPT, ICOS, IKZF3, IRF8, ITK, KLHL6, LAIR1, LYN, NPY1R, PIK3AP1, PIK3CD, PLCG2, PTPN22, RGS1, SASH3, SH3BP2, SIGLEC1, SPPL2A, TNFSF15, TYROBP, VAV1, VAV2, WAS	42
Cellular Growth and Proliferation	expansion	expansion of blood cells	1.87e-12	ABCB1, AHR, ATG7, BCL3, BMP4, BTK, C3, C5AR1, CASP8, CCND1, CCR6, CCR7, CD163, CD180, CD2, CD209, CD244, Cd24a, CD27, CD274, CD40, CD80, CD86, CDKN1B, CSF1R, CTSD, CXCR3, DEF6, DOK1, FAS, FCGR2B, FLT3, FOXO3, FOXP3, GFI1B, HAVCR2, HMOX1, HSPA8, HSPD1, ICOS, IFNAR1, IL10, IL10RA, IL18, IL1B, IL21R, IL4R, IL6, IL6R, IL7R, INHBA, IRF1, JAK3, Klrk1, LCP1, LCP2, LEP, LEPR, LY9, LYN, MAD1L1, MAPK3, MDK…	104		Cell Death and Survival	necrosis	necrosis of tumor	8.55e-15	ADIPOQ, AIFM1, ANPEP, ANXA1, ANXA2, APAF1, AR, ATG7, ATM, ATP7B, B2M, BAG1, BAX, BCL2L11, BDNF, BID, BIRC2, BIRC3, BIRC5, BLNK, BMP4, BMP5, BMP6, BRCA1, BTG1, BTK, C1QTNF4, CA9, CASP1, CASP3, CASP6, CASP8, CAV1, CD22, CD38, CD40, CD44, CDC45, CDC6, CDH1, CDH11, CDK1, CDK2, CDKN1A, CDKN1B, CDKN2A, CHEK1, COL18A1, CRYAB, CSF3R, CTLA4, CTSB, CXCL11, CXCR4, CYCS, DHCR7, E2F1, EGLN3, EIF2AK2, EMP2, EN…	166		Hematological System Development and Function	cell movement	cell movement of phagocytes	1.88e-37	ABCA1, ADAM17, ADIPOQ, ADORA1, AGT, AIF1, ALCAM, ANGPT1, ANXA1, AOC3, APOE, ARG1, BID, BTK, C2, C3, C5AR1, C5AR2, C6, CAPG, CASP1, CCL17, CCL19, CCL2, Ccl2, CCL21, CCL22, CCL3L3, CCL4, CCL5, Ccl9, CCND1, CCR6, CCR7, CD14, CD28, CD4, CD40, CD44, CD69, CD80, CD86, CD9, CDH1, CDKN1A, CES1, CFH, CFTR, CKLF, CLEC11A, CLEC4M, CNR1, CNR2, COL1A1, COL4A3, CORO1A, CSF1R, CSF2RA, CSF3R, CST3, CTSB, CTSE, C…	236		Hematological System Development and Function	quantity	quantity of plasma cells	1.1e-13	CD274, CD40, CEBPE, FCGR2B, FCMR, ICOS, IL10, IL2RB, IL2RG, IL7R, IRF8, ITGB2, LILRB4, LYN, Mt1, PDCD1, PRDM1, PTPN6, RAC2, RASGRP1, RASSF5, RGS1, SDC1, SELE, SELP, TNF, TNFRSF1B, TNFSF15, WAS	29
Cellular Growth and Proliferation	expansion	expansion of leukocytes	3.49e-12	ABCB1, AHR, BCL3, BTK, C3, C5AR1, CASP8, CCR6, CCR7, CD180, CD2, CD209, CD244, Cd24a, CD27, CD274, CD40, CD80, CD86, CDKN1B, CSF1R, CTSD, CXCR3, DEF6, DOK1, FAS, FCGR2B, FLT3, FOXO3, FOXP3, HAVCR2, HMOX1, HSPA8, HSPD1, ICOS, IFNAR1, IL10, IL10RA, IL18, IL1B, IL21R, IL4R, IL6, IL6R, IL7R, IRF1, JAK3, Klrk1, LCP1, LCP2, LEP, LEPR, LY9, LYN, MAD1L1, MDK, MET, MYC, MYD88, NFATC2, NOS1, PARP1, PIK3CB,…	94		Cell Death and Survival	apoptosis	apoptosis	2.12e-54	A2M, A4GALT, AATK, ABCA1, ABCB1, ABCG1, ABCG2, ACACA, ACE, ACSL4, ACSM5, ACVR1C, ADA, ADAM17, ADAMTSL4, ADCY6, ADIPOQ, ADM, ADORA1, ADRA1A, ADRA1B, ADRA1D, ADRB1, ADRBK1, AGT, Agtr1b, AHR, AIF1, AIFM1, AIFM3, AKR1B1, ALCAM, ALDH1A1, ALDH1L1, ALDH3A1, ALDOC, ALKBH3, ALOX12, ALOX15, ALOX15B, AMIGO2, ANGPT1, ANGPTL4, ANPEP, ANXA1, ANXA2, ANXA7, APAF1, APEX1, APLN, APOBEC3B, APOE, AQP1, AQP7, AR, ARC…	1102		Hematological System Development and Function	cell movement	cell movement of mononuclear leukocytes	2.86e-33	ABCA1, Abcb1b, ACKR2, ADAM17, AGT, AIF1, ANGPT1, ANXA1, AOC3, APOE, BACH2, BATF, BCL11B, BTK, C3, C6, CBFB, CCL17, CCL19, CCL2, Ccl2, CCL21, CCL22, CCL3L3, CCL4, CCL5, Ccl6, CCR4, CCR6, CCR7, CCR9, CD1D, CD2, CD226, CD247, CD28, CD3E, CD4, CD40, CD44, CD69, CD80, CD86, CD8A, CIITA, CKLF, CNR2, COL1A1, COL4A3, CTSS, CTSV, CX3CR1, CXCL10, CXCL11, CXCL16, CXCL3, Cxcl9, CXCR1, CXCR3, CXCR4, CYSLTR1, …	199		Hematological System Development and Function	activation	activation of leukocytes	1.46e-66	ADA, ADIPOQ, ADORA1, AGT, AHR, ANGPT1, ANXA1, APOE, ATF3, ATM, BANK1, BCL11B, BCL2L11, BDNF, BID, BLNK, BTK, BTLA, C1QA, C3, C4A/C4B, C5AR1, C6, CADM1, CARD9, CASP1, CASP8, CCL17, Ccl2, CCL2, CCL21, CCL22, CCL4, CCL5, CCR7, CD14, CD180, CD1D, CD2, CD226, CD244, CD247, CD27, CD274, CD28, CD300A, CD300LB, CD300LD, CD300LF, CD37, CD3D, CD3E, CD3G, CD4, CD40, CD44, CD5, CD6, CD69, CD7, CD72, CD74, CD…	289
Cell Death and Survival	cell death	cell death	1.09e-73	A2M, AATF, AATK, ABCA1, ABCB1, ABCB4, ABCC3, ABCC4, ABCC5, ABCC8, ABCD2, ABCE1, ABCG1, ACACA, ACE, ACKR3, ACSL4, ACTB, ACTC1, ACTL6A, ACVR1C, ADA, ADAM17, ADAMTS1, ADAMTS12, ADAMTSL4, ADAR, ADARB1, ADCY6, ADCYAP1R1, ADIPOQ, ADORA1, ADRA1A, ADRA1B, ADRB1, ADRBK1, AGT, AHR, AICDA, AIF1, AIFM1, AIMP1, ALCAM, ALDH1A1, ALDH3A1, ALDH3B1, ALDOC, ALKBH3, AMH, AMPD3, ANGPTL4, ANK3, ANKRD1, ANPEP, ANTXR1, …	1425		Cell Death and Survival	apoptosis	apoptosis of tumor cell lines	4.26e-33	A4GALT, AATK, ABCB1, ABCG2, ACACA, ACSM5, ACVR1C, ADAM17, ADIPOQ, ADM, ADORA1, ADRBK1, AGT, AHR, AIFM1, AKR1B1, ALCAM, ALDH1L1, ALKBH3, ALOX12, ALOX15, ANXA2, APAF1, APOE, AR, ARG1, ARHGAP4, ARL11, ARRB2, ARSB, ATAD2, ATF1, ATF3, ATG10, ATG7, ATM, ATN1, ATP2A1, AURKA, B2M, BAG1, BARD1, BAX, BAZ1A, BCL2A1, BCL2L11, BCL3, BDNF, BID, BIRC2, BIRC3, BIRC5, BLNK, BMF, BMP4, BMP6, BNIP3, BRCA1, BRCA2, B…	519		Hematological System Development and Function	cell movement	cell movement of granulocytes	6.17e-30	ADAM17, ADIPOQ, ADORA1, AGT, ANXA1, AOC3, APOE, BTK, C2, C3, C5AR1, C5AR2, CAPG, CASP1, CBFB, CCL17, CCL19, Ccl2, CCL2, CCL21, CCL3L3, CCL4, CCL5, CCR6, CCR7, CD14, CD2, CD28, CD44, CD69, CFH, CFTR, CKLF, CLEC11A, CMA1, CORO1A, CRYAB, CSF2RA, CSF3R, CST3, CTSB, CXADR, CXCL10, CXCL11, CXCL14, CXCL2, CXCL3, Cxcl3, CXCL6, Cxcl9, CXCR1, CXCR3, CYBB, EDNRA, F10, F2R, F2RL1, FASLG, FCER1G, FCGR2A, FGR,…	164		Hematological System Development and Function	activation	activation of blood cells	5.41e-64	ADA, ADIPOQ, ADORA1, AGT, AHR, ANGPT1, ANXA1, APOE, ATF3, ATM, BANK1, BCL11B, BCL2L11, BDNF, BID, BLNK, BTK, BTLA, C1QA, C3, C4A/C4B, C5AR1, C6, CADM1, CARD9, CASP1, CASP8, CCL17, CCL2, Ccl2, CCL21, CCL22, CCL4, CCL5, CCR7, CD14, CD180, CD1D, CD2, CD226, CD244, CD247, CD27, CD274, CD28, CD300A, CD300LB, CD300LD, CD300LF, CD37, CD3D, CD3E, CD3G, CD4, CD40, CD44, CD5, CD6, CD69, CD7, CD72, CD74, CD…	298
Cell Death and Survival	cell death	cell death of tumor cell lines	1.82e-40	AATF, AATK, ABCB1, ABCB4, ABCC4, ABCE1, ACACA, ACKR3, ACVR1C, ADAM17, ADAMTS12, ADIPOQ, ADORA1, ADRBK1, AGT, AHR, AIFM1, AIMP1, ALCAM, ALKBH3, AMH, ANKRD1, ANXA2, AP2A2, APAF1, APEX1, APOE, APP, AR, AREG, ARG1, ARHGAP4, ARHGDIA, ARL11, ARRB2, ATAD2, ATF1, ATG7, ATM, ATP13A2, ATP2A1, ATP2B1, ATP5A1, AURKA, AURKB, BAG1, BARD1, BAX, BAZ1A, BCAS2, BCHE, BCL2A1, BCL2L11, BCL3, BCLAF1, BID, BIRC3, BIRC…	667		Cell Death and Survival	apoptosis	apoptosis of leukocytes	3.08e-32	ABCG1, ADA, ADAM17, ADRB1, AHR, ANPEP, ANXA1, APOE, Art2b, ATF3, ATM, AURKB, BAX, BCL11A, BCL11B, BCL2A1, BCL2L11, BCL3, BID, BIRC2, BIRC3, BIRC5, BLNK, BMF, BMP4, BRCA1, BTG1, BTK, C1QA, CASP1, CASP3, CASP4, CASP6, CASP7, CASP8, CAV1, CCDC86, CCL19, CCL2, Ccl2, CCL21, CCL4, CCL5, CCNB1, CCR7, CD14, CD2, CD22, CD247, Cd24a, CD27, CD28, CD38, CD3E, CD4, CD40, CD44, CD5, CD5L, CD69, CD80, CD9, CDK2…	240		Hematological System Development and Function	cell movement	cell movement of lymphocytes	3.02e-28	Abcb1b, ACKR2, ADAM17, AGT, ANXA1, AOC3, BACH2, BATF, BCL11B, BTK, C3, C6, CBFB, CCL17, CCL19, Ccl2, CCL2, CCL21, CCL22, CCL3L3, CCL4, CCL5, Ccl6, CCR4, CCR6, CCR7, CCR9, CD1D, CD2, CD226, CD247, CD28, CD3E, CD4, CD40, CD44, CD69, CD80, CD86, CD8A, CKLF, CNR2, COL1A1, COL4A3, CTSS, CTSV, CX3CR1, CXCL10, CXCL11, CXCL16, CXCL3, Cxcl9, CXCR3, CXCR4, CYSLTR1, CYTIP, DOCK8, ESR1, ESR2, EZR, F2RL1, FAM…	167		Hematological System Development and Function	activation	activation of mononuclear leukocytes	2.94e-43	ADA, ADIPOQ, AHR, ANXA1, APOE, BANK1, BCL11B, BCL2L11, BLNK, BTK, BTLA, C1QA, C3, C4A/C4B, CADM1, CASP8, Ccl2, CCL2, CCL22, CCL4, CCL5, CCR7, CD14, CD180, CD1D, CD2, CD226, CD244, CD247, CD27, CD274, CD28, CD3D, CD3E, CD3G, CD4, CD40, CD44, CD5, CD6, CD69, CD7, CD72, CD74, CD80, CD83, CD86, CD8A, CISH, CLEC5A, CLEC7A, Cmah, CNR1, CORO1A, CXCL10, DAPP1, DDR1, DOK3, EGR2, F10, FCER1G, FCGR2A, FCGR2…	192
Cell Death and Survival	cell death	cell death of blood cells	4.35e-37	ABCB1, ABCC4, ABCG1, ACTL6A, ADA, ADAM17, ADRB1, AHR, AICDA, AIFM1, AIMP1, ANPEP, ANXA1, APAF1, APOE, APP, Art2b, ATF7, ATM, AURKB, BAG1, BAX, BCL11A, BCL2A1, BCL2L11, BCL3, BID, BIRC3, BIRC5, BLNK, BMP2, BMP4, BRCA1, BTG1, BTK, C3, CACNB3, CAMP, CASP1, CASP3, CASP6, CASP7, CASP8, CBFB, CCDC86, CCL2, Ccl2, CCL21, CCL3L3, CCL4, CCNB1, CCR7, CD14, CD19, CD2, CD22, CD226, CD247, Cd24a, CD27, CD274, …	348		Cell Death and Survival	apoptosis	apoptosis of blood cells	3.12e-31	ABCG1, ADA, ADAM17, ADRB1, AHR, ANPEP, ANXA1, APOE, Art2b, ATF3, ATM, AURKB, BAX, BCL11A, BCL11B, BCL2A1, BCL2L11, BCL3, BID, BIRC2, BIRC3, BIRC5, BLNK, BMF, BMP4, BRCA1, BTG1, BTK, C1QA, CASP1, CASP3, CASP4, CASP6, CASP7, CASP8, CAV1, CCDC86, CCL19, CCL2, Ccl2, CCL21, CCL3L3, CCL4, CCL5, CCNB1, CCR7, CD14, CD2, CD22, CD247, Cd24a, CD27, CD28, CD38, CD3E, CD4, CD40, CD44, CD5, CD5L, CD69, CD7, CD…	252		Hematological System Development and Function	cell movement	cell movement of neutrophils	1.7e-27	ADAM17, ADIPOQ, ADORA1, AGT, ANXA1, APOE, BTK, C2, C3, C5AR1, C5AR2, CAPG, CASP1, CCL19, Ccl2, CCL2, CCL21, CCL3L3, CCL4, CCL5, CCR6, CCR7, CD14, CD28, CD44, CD69, CFH, CFTR, CKLF, CORO1A, CSF2RA, CSF3R, CST3, CTSB, CXADR, CXCL10, CXCL14, CXCL2, CXCL3, Cxcl3, CXCL6, CXCR1, CYBB, EDNRA, F10, F2RL1, FASLG, FCER1G, FCGR2A, FGR, FN1, FUT4, FUT7, GJB2, GRK6, GRN, GSN, HCK, HGF, HMOX1, HSPB1, ICAM1, IL…	135		Hematological System Development and Function	activation	activation of lymphocytes	3.85e-43	ADA, ADIPOQ, AHR, ANXA1, APOE, BANK1, BCL11B, BCL2L11, BLNK, BTK, BTLA, C1QA, C3, C4A/C4B, CADM1, CASP8, Ccl2, CCL2, CCL22, CCL4, CCL5, CCR7, CD180, CD1D, CD2, CD226, CD244, CD247, CD27, CD274, CD28, CD3D, CD3E, CD3G, CD4, CD40, CD44, CD5, CD6, CD69, CD7, CD72, CD74, CD80, CD83, CD86, CD8A, CISH, CLEC7A, Cmah, CNR1, CORO1A, CXCL10, DAPP1, DDR1, DOK3, EGR2, FCER1G, FCGR2A, FCGR2B, FCGR3A/FCGR3B, F…	186
Cell Death and Survival	cell death	cell death of immune cells	7.23e-36	ABCB1, ABCC4, ABCG1, ACTL6A, ADA, ADAM17, ADRB1, AHR, AICDA, AIFM1, AIMP1, ANPEP, ANXA1, APAF1, APOE, APP, Art2b, ATM, AURKB, BAG1, BAX, BCL11A, BCL2A1, BCL2L11, BCL3, BID, BIRC3, BIRC5, BLNK, BMP2, BMP4, BRCA1, BTG1, BTK, C3, CACNB3, CAMP, CASP1, CASP3, CASP6, CASP7, CASP8, CBFB, CCDC86, CCL2, Ccl2, CCL21, CCL4, CCNB1, CCR7, CD14, CD19, CD2, CD22, CD226, CD247, Cd24a, CD27, CD274, CD300A, CD38, …	333		Cell Death and Survival	apoptosis	apoptosis of mononuclear leukocytes	1.83e-24	ADA, ADRB1, AHR, APOE, Art2b, ATM, AURKB, BAX, BCL11A, BCL11B, BCL2A1, BCL2L11, BCL3, BID, BLNK, BMF, BMP4, BRCA1, BTK, CASP1, CASP3, CASP4, CASP6, CASP7, CASP8, CAV1, CCDC86, CCL19, Ccl2, CCL4, CCL5, CCNB1, CD2, CD22, CD247, Cd24a, CD27, CD28, CD38, CD3E, CD4, CD40, CD44, CD5, CD80, CD9, CDK2, CDKN1A, CDKN1B, CDKN2A, CHEK1, CHEK2, CIITA, COL1A1, CORO1A, CR2, CTLA4, CXCR4, DCK, DHX58, DLL1, DOCK8…	182		Hematological System Development and Function	cell movement	cell movement of T lymphocytes	3.41e-22	ACKR2, ADAM17, AGT, AOC3, BACH2, BATF, BCL11B, C3, C6, CCL17, CCL19, Ccl2, CCL2, CCL21, CCL22, CCL3L3, CCL4, CCL5, CCR4, CCR6, CCR7, CCR9, CD28, CD40, CD44, CD69, CD80, CD86, COL1A1, COL4A3, CTSS, CTSV, CXCL10, CXCL11, CXCL16, Cxcl9, CXCR3, CXCR4, CYSLTR1, DOCK8, ESR2, F2RL1, FAM65B, FASLG, FN1, FOXO1, FUT4, FUT7, FYB, GNRH1, HGF, HLA-A, ICAM1, ICOS, IL16, IL17C, IL17RA, IL18BP, IL1B, IL6, INPP5D…	101		Hematological System Development and Function	activation	activation of phagocytes	1.36e-37	ADIPOQ, ADORA1, AGT, AHR, ANGPT1, ANXA1, APOE, ATF3, ATM, BDNF, BID, BTK, C3, C4A/C4B, C5AR1, C6, CARD9, CASP1, CCL17, Ccl2, CCL2, CCL21, CCL22, CCL4, CCL5, CCR7, CD14, CD1D, CD226, CD300A, CD300LB, CD300LD, CD300LF, CD37, CD4, CD40, CD44, CD80, CD86, CEBPE, CERK, CFH, CHGA, CLCN7, CLEC4E, CLEC4M, CLEC5A, CLEC7A, CNR1, CNR2, CRYAA/LOC102724652, CSF1R, CX3CR1, CXCL10, CYBB, EDN1, F2RL1, FCER1G, FC…	150
Cell Death and Survival	cell death	cell death of mononuclear leukocytes	3.82e-25	ADA, ADRB1, AHR, AIFM1, AIMP1, APAF1, APOE, APP, Art2b, ATM, AURKB, BAX, BCL11A, BCL2A1, BCL2L11, BCL3, BID, BIRC5, BLNK, BMP4, BRCA1, BTK, CAMP, CASP1, CASP3, CASP6, CASP7, CASP8, CCDC86, Ccl2, CCL4, CCNB1, CD2, CD22, CD226, CD247, Cd24a, CD27, CD274, CD38, CD40, CD44, CD5, CD7, CD80, CD9, CDK1, CDK2, CDKN1A, CDKN1B, CHEK1, CHEK2, CHI3L1, CIITA, CLEC10A, COL1A1, COMT, CORO1A, CST3, CTSB, CTSD, C…	202		Cell Death and Survival	apoptosis	apoptosis of lymphocytes	5.45e-24	ADA, ADRB1, AHR, APOE, Art2b, ATM, AURKB, BAX, BCL11A, BCL11B, BCL2A1, BCL2L11, BCL3, BID, BLNK, BMF, BMP4, BRCA1, BTK, CASP1, CASP3, CASP4, CASP6, CASP7, CASP8, CAV1, CCDC86, CCL19, Ccl2, CCL4, CCL5, CCNB1, CD2, CD22, CD247, Cd24a, CD27, CD28, CD38, CD3E, CD4, CD40, CD44, CD5, CD80, CD9, CDK2, CDKN1A, CDKN1B, CDKN2A, CHEK1, CHEK2, CIITA, COL1A1, CORO1A, CR2, CTLA4, CXCR4, DCK, DHX58, DOCK8, E2F1…	177		Hematological System Development and Function	cell movement	cell movement of antigen presenting cells	2.47e-21	ACKR2, ADAM17, ADIPOQ, ADORA1, AGT, ALCAM, ANXA1, APOE, ARG1, BID, C3, C5AR1, C6, CASP1, CCL17, CCL19, Ccl2, CCL2, CCL21, CCL22, CCL3L3, CCL4, CCL5, Ccl9, CCND1, CCR6, CCR7, CD40, CD44, CD80, CD86, CDH1, CDKN1A, CES1, CKLF, CLEC4M, CNR1, CNR2, COL4A3, CSF1R, CTSE, CTSZ, CX3CR1, CXCL10, CXCL11, CXCL14, CXCR1, CXCR3, CXCR4, CYBB, DOCK8, EDNRB, EGLN3, ELN, FASLG, GSN, HCLS1, HGF, HMOX1, HRH1, ICAM1,…	139		Hematological System Development and Function	activation	activation of myeloid cells	5.38e-35	ADIPOQ, ADORA1, AGT, AHR, ANGPT1, ANXA1, APOE, ATF3, ATM, BDNF, BID, C3, C4A/C4B, C5AR1, C6, CASP1, CCL17, Ccl2, CCL2, CCL21, CCL22, CCL4, CCL5, CD14, CD1D, CD226, CD300A, CD300LB, CD300LD, CD300LF, CD4, CD40, CD44, CD80, CD86, CEBPE, CERK, CFH, CHGA, CLCN7, CLEC4E, CLEC5A, CNR1, CNR2, CSF1R, CX3CR1, CXCL10, CYBB, EDN1, F2RL1, FCER1G, FCGR2A, FCGR2B, GJB1, GRN, GZMA, HAVCR2, HCK, HLA-A, HMOX1, HP…	139
Cell Death and Survival	cell death	cell death of lymphocytes	8.03e-25	ADA, ADRB1, AHR, AIFM1, AIMP1, APAF1, APOE, Art2b, ATM, AURKB, BAX, BCL11A, BCL2A1, BCL2L11, BCL3, BID, BIRC5, BLNK, BMP4, BRCA1, BTK, CAMP, CASP1, CASP3, CASP6, CASP7, CASP8, CCDC86, Ccl2, CCL4, CCNB1, CD2, CD22, CD226, CD247, Cd24a, CD27, CD274, CD38, CD40, CD44, CD5, CD7, CD80, CD9, CDK1, CDK2, CDKN1A, CDKN1B, CHEK1, CHEK2, CHI3L1, CIITA, CLEC10A, COL1A1, COMT, CORO1A, CST3, CTSB, CTSD, CXCL10…	197		Cell Death and Survival	apoptosis	apoptosis of phagocytes	9.74e-20	ABCG1, ADAM17, AHR, ANPEP, ANXA1, APOE, ATF3, BAX, BCL2A1, BCL2L11, BID, BIRC2, BIRC3, BIRC5, BTG1, BTK, C1QA, CASP1, CASP3, CASP4, CASP6, CASP8, CCL19, CCL2, CCL21, CCL5, CCR7, CD14, CD40, CD44, CD5L, CDKN1A, CDKN1B, CDKN2A, CNR1, CNR2, CXCL2, CXCR4, CYBB, DLL1, EIF2AK2, FADD, FASLG, FCER1A, FCER1G, FOS, GPR132, GSN, HAVCR2, HIF1A, IL10, IL11, IL12A, IL18, IL1B, IL1RL1, IL1RN, IL21, IL6, INPP5D,…	102		Hematological System Development and Function	cell movement	cell movement of macrophages	1.85e-17	ADAM17, ADIPOQ, AGT, ANXA1, APOE, ARG1, BID, C3, C6, CASP1, Ccl2, CCL2, CCL21, CCL22, CCL3L3, CCL4, CCL5, CCND1, CCR6, CD44, CDKN1A, CES1, CKLF, CNR1, CNR2, COL4A3, CSF1R, CTSE, CX3CR1, CXCL10, CXCR3, CXCR4, CYBB, EDNRB, EGLN3, ELN, FASLG, GSN, HGF, HMOX1, ICAM1, IL16, IL17C, IL17RA, IL18, IL1B, IL1RN, IL4R, IRF6, Irgm1, ITGAL, ITGB2, LCAT, LEP, LGALS3, LTB, MDK, MIF, MMP12, MMP28, MMP7, MST1, MY…	105		Hematological System Development and Function	activation	activation of T lymphocytes	4.29e-32	ADA, ANXA1, APOE, BCL11B, BCL2L11, BTLA, C3, CADM1, CASP8, CCL2, Ccl2, CCL22, CCL4, CCL5, CD1D, CD2, CD226, CD244, CD247, CD27, CD274, CD28, CD3D, CD3E, CD3G, CD4, CD40, CD44, CD6, CD7, CD74, CD80, CD83, CD86, CD8A, CISH, CLEC7A, CNR1, CORO1A, CXCL10, DDR1, EGR2, FCER1G, FGF1, FOS, GADD45A, GZMA, HAVCR2, HGF, HLA-A, HLA-DRA, HSH2D, HSPH1, ICAM1, ICOS, IGF2R, IL10, IL12B, IL12RB2, IL18, IL1B, IL21…	139
Cell Death and Survival	cell death	cell death of connective tissue cells	2.29e-19	AATF, ABCB1, ABCC4, ABCE1, ACTB, ADIPOQ, ADRBK1, AGT, AHR, AIFM1, APAF1, APLN, APP, AR, ARRB2, ATF5, ATG7, ATM, ATP6AP2, BAX, BCL2A1, BCL2L11, BGN, BID, BIRC3, BIRC5, BMP2, BMP4, BRCA1, BRCA2, BUB1, CA3, CAMP, CASP1, CASP3, CASP7, CASP8, CASP8AP2, CCL24, Ccl9, CCNB1, CCND1, CCNE1, CD1D, CD2, CD300LD, CD40, CD44, CDC20, CDH1, CDK1, CDK4, CDKN1A, CDKN1B, Cdkn1c, CEBPB, CHEK1, CNR2, COL2A1, COMMD4, …	264		Cell Death and Survival	apoptosis	apoptosis of T lymphocytes	1.12e-19	ADA, ADRB1, AHR, APOE, Art2b, ATM, BAX, BCL11B, BCL2A1, BCL2L11, BCL3, BID, BMF, BMP4, BRCA1, CASP1, CASP3, CASP6, CASP7, CASP8, CAV1, CCDC86, CCL19, Ccl2, CCL4, CCL5, CCNB1, CD2, CD247, Cd24a, CD27, CD28, CD38, CD3E, CD4, CD44, CD5, CD9, CDK2, CDKN1A, CDKN1B, CDKN2A, CHEK1, CHEK2, CIITA, CORO1A, CTLA4, CXCR4, DCK, DHX58, DOCK8, E2F1, EZR, FADD, FASLG, FCGR1A, FCMR, FOS, Gm21596/Hmgb1, GPR132, GR…	141		Hematological System Development and Function	cell movement	cell movement of hematopoietic cells	2.79e-13	BDNF, BMP4, CCL19, CCL2, CCL21, CCL22, CCL3L3, CCL4, CCL5, CCR4, CCR9, CD28, CD44, CD69, CIB1, CXCL10, CXCL11, CXCR3, CXCR4, DDR1, DOCK8, HGF, ICAM1, ITGA4, ITGA6, ITGAL, ITGB2, JAK2, KLF2, LCP1, MMP9, PLCG2, RGS1, RUNX1, SELE, SELPLG, SPI1, SYK, TCIRG1, TNF, ZAP70	41		Hematological System Development and Function	activation	activation of antigen presenting cells	6.12e-32	ADIPOQ, ADORA1, AGT, AHR, ANGPT1, APOE, ATF3, ATM, BDNF, BID, BTK, C3, C6, CARD9, CASP1, CCL2, Ccl2, CCL21, CCL22, CCL4, CCL5, CCR7, CD14, CD1D, CD37, CD4, CD40, CD44, CD74, CD80, CD86, CEBPE, CHGA, CLCN7, CLEC4E, CLEC4M, CLEC7A, CNR2, CRYAA/LOC102724652, CSF1R, CTSS, CX3CR1, CXCL10, CYBB, EDN1, F2RL1, FCER1G, FCGR1A, FCGR2A, GJB1, HAVCR2, HCK, HGF, HLA-A, HLA-DOA, HLA-DQA1, HLA-DQB1, HMOX1, HPSE…	126
Cell Death and Survival	cell death	cell death of myeloid cells	3.48e-19	ABCB1, ABCC4, ABCG1, ADAM17, AHR, ANPEP, ANXA1, APOE, APP, BAX, BCL2A1, BID, BIRC3, BIRC5, BTG1, BTK, CAMP, CASP1, CASP3, CASP6, CASP7, CASP8, CCL2, CD14, CD40, CD44, CDK2, CDKN1A, CEBPB, CTSB, CXCL2, CXCR4, CYBB, DCN, EIF2AK2, FABP4, FADD, FAS, FCER1G, FCGR1A, FOS, FOXO3, GPR132, GSN, HAVCR2, HCAR2, HIF1A, HMOX1, IFNAR1, IL10, IL18, IL1B, IL1RL1, IL1RN, IL33, IL6, INPP5D, IRF1, IRF8, ISG15, ITGA…	113		Cell Death and Survival	apoptosis	apoptosis of myeloid cells	1.32e-18	ABCG1, ADAM17, AHR, ANPEP, ANXA1, APOE, ATF3, BAX, BCL2A1, BID, BIRC2, BIRC3, BIRC5, BTG1, BTK, C1QA, CASP1, CASP3, CASP4, CASP6, CASP8, CCL2, CCL5, CD14, CD44, CD5L, CD69, CDK2, CDKN1A, CDKN2A, CXCL2, CXCR4, CYBB, DLL1, EIF2AK2, FADD, FASLG, FCER1A, FCER1G, FCGR1A, FOS, GPR132, GSN, HAVCR2, HIF1A, IL10, IL12A, IL18, IL1B, IL1RL1, IL1RN, IL6, INPP5D, IRF1, IRF8, ISG15, ITGAM, ITGB2, JAK2, LCN2, L…	100		Hematological System Development and Function	cell movement	cell movement of hematopoietic progenitor cells	1.33e-12	BMP4, CCL19, CCL2, CCL21, CCL22, CCL3L3, CCL4, CCL5, CCR4, CCR9, CD28, CD69, CIB1, CXCL10, CXCL11, CXCR3, CXCR4, DDR1, DOCK8, HGF, ICAM1, ITGA4, ITGA6, ITGAL, ITGB2, JAK2, KLF2, LCP1, MMP9, PLCG2, RGS1, RUNX1, SELPLG, SPI1, SYK, TCIRG1, TNF, ZAP70	38		Hematological System Development and Function	activation	activation of macrophages	3.72e-24	ADIPOQ, ADORA1, AGT, AHR, ANGPT1, APOE, ATF3, ATM, BDNF, BID, C3, C6, CASP1, CCL2, Ccl2, CCL21, CCL22, CCL4, CCL5, CD14, CD1D, CD4, CD40, CD44, CEBPE, CHGA, CLCN7, CLEC4E, CNR2, CSF1R, CX3CR1, CXCL10, CYBB, EDN1, F2RL1, FCER1G, GJB1, HAVCR2, HCK, HLA-A, HMOX1, HPSE, ICAM1, IL10, IL18, IL1B, IL1R1, IL1RN, IL4R, INHBA, IRF6, JAK2, LCN2, LEP, LGALS3, LTBP1, MAOB, MMP9, MSR1, NFIL3, NOS2, NPY, NRG1, …	92
Cell Death and Survival	cell death	cell death of T lymphocytes	4.3e-19	ADA, ADRB1, AHR, AIFM1, APAF1, APOE, Art2b, ATM, BAX, BCL2A1, BCL2L11, BCL3, BID, BIRC5, BMP4, BRCA1, CASP1, CASP3, CASP6, CASP7, CASP8, CCDC86, Ccl2, CCL4, CCNB1, CD2, CD247, Cd24a, CD27, CD274, CD38, CD40, CD44, CD5, CD7, CD9, CDK1, CDK2, CDKN1A, CDKN1B, CHEK1, CHEK2, CHI3L1, CIITA, CLEC10A, CORO1A, CST3, CTSD, CXCL10, CXCR4, DCK, DDIT4, DEF6, DHX58, DOCK8, DRAM1, E2F1, EZR, FADD, FAS, FCGR1A, …	155		Cell Death and Survival	apoptosis	apoptosis of antigen presenting cells	3.92e-14	ABCG1, APOE, BCL2L11, BIRC2, BIRC3, BIRC5, BTG1, C1QA, CASP1, CASP3, CASP4, CASP6, CASP8, CCL19, CCL21, CCL5, CCR7, CD14, CD40, CD5L, CDKN1A, CDKN1B, CDKN2A, CNR1, CNR2, EIF2AK2, FADD, FASLG, FOS, GPR132, HIF1A, IL10, IL11, IL18, IL1B, IL21, INPP5D, IRF1, IRF5, ISG15, LCN2, LDLR, LEP, LGALS3, MSR1, MYD88, NGF, OSCAR, PARP1, PCTP, PF4, PIK3AP1, PLA2G4A, PLA2G6, PPARG, PTPN6, RIPK1, RIPK3, SERPINF1…	71		Hematological System Development and Function	activation	activation of leukocytes	3.66e-45	ACE, ADA, ADIPOQ, ADORA1, AGT, AHR, ANGPT1, ANXA1, APOE, ATF3, ATM, BANK1, BCL11B, BCL2L11, BCL3, BDNF, BID, BLK, BLNK, BTK, BTLA, C1QA, C3, C5AR1, C6, CADM1, CAMK4, CARD9, CASP1, CASP8, CCL17, CCL2, Ccl2, CCL21, CCL22, CCL4, CCL5, CCR7, CD14, CD180, CD1D, CD2, CD226, CD244, CD247, CD27, CD28, CD300A, CD300LB, CD300LD, CD300LF, CD37, CD3D, CD3E, CD3G, CD4, CD40, CD44, CD5, CD6, CD63, CD69, CD7, C…	299		Hematological System Development and Function	activation	activation of natural killer cells	7.96e-18	ADIPOQ, AHR, BTK, CASP8, CCL5, CD1D, CD2, CD226, CD244, CD27, CD28, CD4, CD40, CD44, CD69, CD86, FCGR2A, FCGR3A/FCGR3B, FLT3, HLA-G, IL10, IL12B, IL18, IL18R1, IL1B, IL1RN, IL2RB, IRF1, ITGAL, ITGB2, Klra4 (includes others), Klra5 (includes others), KLRB1, Klre1, Klrk1, LEP, LYST, NCR1, NCR3, NPY, PIK3CD, PRF1, PRKCQ, S100A9, SLAMF6, SPN, SPP1, STAT4, TLR1, TLR3, TLR9, TNF, TYK2, TYROBP, WAS	55
Cell Death and Survival	cell death	neuronal cell death	6.59e-19	A2M, AATK, ADA, ADARB1, ADCYAP1R1, ADORA1, ADRBK1, AGT, AIFM1, AMH, APAF1, APLN, APOE, APP, AR, AREG, ASTN1, ATG7, ATM, ATP13A2, ATP1A2, BACE1, BAG1, BAX, BCL2L11, BID, BIRC5, BMP2, BMP4, C5AR1, CASP1, CASP3, CASP6, CASP7, CASP8, CCL2, Ccl2, CCL3L3, CCL4, CDC25A, CDK1, CDK2, CDK4, CDK5R1, CDKN1A, CDKN1B, CEBPB, CHEK1, CHEK2, CLCF1, CLCN7, CNTF, CNTFR, CORO1A, CTH, CTSB, CTSD, CTSV, CXCL3, CYBA, C…	298		Cell Death and Survival	apoptosis	apoptosis of epithelial cells	5.05e-14	ACE, ADIPOQ, ADRBK1, AHR, ALDH1A1, APAF1, ATM, AURKA, BAX, BCL2A1, BCL2L11, BID, BIRC5, BMF, BMP6, CASP1, CASP3, CASP7, CASP8, CBS/CBSL, CCK, CCND1, CD1D, CD4, CD40, CDH1, CDKN1A, CDKN1B, CDKN2A, CEBPA, CHEK1, CIT, Clca3a1/Clca3a2, CRYAA/LOC102724652, CRYAB, CTSB, CTSS, CXCL10, DSG3, E2F1, ESR1, ESR2, FADD, FASLG, GADD45A, HGF, HIPK2, IL10, IL11, IL18, IL1B, IL6, INHBA, IRF1, IRF5, ITIH4, KL, LCN…	129		Hematological System Development and Function	activation	activation of blood cells	1.41e-43	ACE, ADA, ADIPOQ, ADORA1, AGT, AHR, ANGPT1, ANXA1, APOE, ATF3, ATM, BANK1, BCL11B, BCL2L11, BCL3, BDNF, BID, BLK, BLNK, BTK, BTLA, C1QA, C3, C5AR1, C6, CADM1, CAMK4, CARD9, CASP1, CASP8, CCL17, CCL2, Ccl2, CCL21, CCL22, CCL4, CCL5, CCR7, CD14, CD180, CD1D, CD2, CD226, CD244, CD247, CD27, CD28, CD300A, CD300LB, CD300LD, CD300LF, CD37, CD3D, CD3E, CD3G, CD4, CD40, CD44, CD5, CD6, CD63, CD69, CD7, C…	311		Hematological System Development and Function	activation	activation of B lymphocytes	2.04e-14	ADA, APOE, BANK1, BLNK, BTK, C1QA, C4A/C4B, CASP8, CCR7, CD180, CD40, CD72, CD80, CD86, CD8A, Cmah, DAPP1, DOK3, FCGR2B, FCGR3A/FCGR3B, IL10, IL12RB2, IL18, IL2RB, INPP5D, IRF5, IRF6, ITGB2, LAT2, LAX1, LEP, LYN, NOD2, OSM, PDCD1, PIK3CD, PTPRC, SAMSN1, SEMA4D, SIRPA, TBC1D10C, TLR3, TLR4, TLR9, TNF, TNFAIP8L2, TNFSF13, TNIP2, UBE2N, VAV1, VAV2, ZAP70	52
Cell Death and Survival	cell death	cell death of epithelial cells	1.51e-18	AATF, ACE, ADAR, ADIPOQ, ADRBK1, AHR, AIFM1, ALDH1A1, ALDH3A1, ALDH3B1, AMH, APAF1, APOBEC3B, APP, AR, ATF7, ATG7, ATM, ATP13A2, ATP1A4, AURKA, BAX, BCL2A1, BCL2L11, BID, BIRC3, BIRC5, BMP4, BMP6, CA3, CAMP, CASP1, CASP3, CASP7, CASP8, CASR, CCHCR1, CCND1, CD1D, CD40, CD44, CDH1, CDKN1A, CDKN1B, CEACAM1, CEBPB, CHEK1, Clca3a1/Clca3a2, CSF1R, CTSB, CTSS, CXCL10, CXCL3, CYCS, CYP2E1, DAB2, DAP3, DC…	223		Cell Death and Survival	survival	cell survival	7.23e-32	ABCB1, Abcb1b, ABCB4, ABCC3, ABCG2, ACE, ACER2, ACKR3, ACSL5, ACTL6A, ADAM17, ADIPOQ, ADORA1, ADRBK1, AEN, AHR, AIFM1, AK5, ALCAM, ALKBH3, ALOX12, AMIGO2, ANGPT1, APAF1, APEX1, APLN, APOE, AR, ARTN, ASCC3, ATF1, ATF3, ATF5, ATG12, ATG7, ATM, ATP7B, AURKA, AURKB, B2M, BAG1, BAMBI, BARD1, BAX, BCL2A1, BCL2L11, BCL3, BDNF, BID, BIRC5, BMP4, BMP5, BMP6, BNIP3, BRCA1, BRCA2, BTC, BTK, C11orf31, C1QTNF…	585		Hematological System Development and Function	activation	activation of lymphocytes	4.63e-28	ADA, ADIPOQ, AHR, ANXA1, APOE, BANK1, BCL11B, BCL2L11, BCL3, BLK, BLNK, BTK, BTLA, C1QA, C3, CADM1, CAMK4, CASP8, Ccl2, CCL2, CCL22, CCL4, CCL5, CCR7, CD180, CD1D, CD2, CD226, CD244, CD247, CD27, CD28, CD3D, CD3E, CD3G, CD4, CD40, CD44, CD5, CD6, CD69, CD7, CD72, CD80, CD83, CD86, CD8A, CDKN1A, CHRNB2, CISH, CLEC7A, Cmah, CNR1, CORO1A, CXCL10, DAPP1, DDR1, DOK3, FADD, FASLG, FCER1G, FCGR2A, FCGR2…	189		Hematological System Development and Function	cell movement	cell movement of leukocytes	2.27e-62	ABCA1, Abcb1b, ABCB4, ACKR2, ADA, ADAM17, ADIPOQ, ADORA1, ADRB3, AGT, AIF1, ALB, ALCAM, ANGPT1, ANXA1, APOE, ARG1, B4GALT1, BACH2, BATF, BCL11B, BID, BTK, C2, C3, C4A/C4B, C5AR1, C5AR2, C6, CAMK1D, CAPG, CASP1, CBFB, CCL17, CCL19, CCL2, Ccl2, CCL21, CCL22, CCL3L3, CCL4, CCL5, Ccl6, Ccl9, CCR6, CCR7, CCR9, CD14, CD1D, CD2, CD226, CD247, CD274, CD28, CD3E, CD4, CD40, CD44, CD69, CD74, CD80, CD86, C…	300
Cell Death and Survival	cell death	cell death of phagocytes	4.04e-18	ABCC4, ABCG1, ADAM17, AHR, ANPEP, ANXA1, APOE, APP, BAX, BCL2A1, BCL2L11, BID, BIRC3, BIRC5, BTG1, BTK, CAMP, CASP1, CASP3, CASP6, CASP7, CASP8, CCL2, CCL21, CCR7, CD14, CD40, CD44, CDKN1A, CDKN1B, CEBPB, CNR2, CTSB, CXCL2, CXCR4, CYBB, DCN, EIF2AK2, FABP4, FADD, FAS, FCER1G, FOS, FOXO3, GPR132, GSN, HAVCR2, HCAR2, HIF1A, HMOX1, IFNAR1, IL10, IL11, IL18, IL1B, IL1RL1, IL1RN, IL33, IL6, INPP5D, IR…	109		Cell Death and Survival	cell viability	cell viability	3.52e-31	ABCB1, Abcb1b, ABCB4, ABCC3, ABCG2, ACE, ACER2, ACKR3, ACSL5, ACTL6A, ADAM17, ADIPOQ, ADORA1, ADRBK1, AEN, AIFM1, AK5, ALKBH3, ALOX12, AMIGO2, ANGPT1, APAF1, APEX1, APLN, APOE, AR, ARTN, ASCC3, ATF1, ATF5, ATG12, ATG7, ATM, ATP7B, AURKA, AURKB, B2M, BAG1, BARD1, BAX, BCL2A1, BCL2L11, BCL3, BDNF, BID, BIRC5, BMP4, BMP5, BMP6, BNIP3, BRCA1, BRCA2, BTC, BTK, C11orf31, C1QTNF4, C3, C5AR2, CA9, CACNB3…	546		Hematological System Development and Function	activation	activation of mononuclear leukocytes	8.74e-28	ADA, ADIPOQ, AHR, ANXA1, APOE, BANK1, BCL11B, BCL2L11, BCL3, BLK, BLNK, BTK, BTLA, C1QA, C3, CADM1, CAMK4, CASP8, CCL2, Ccl2, CCL22, CCL4, CCL5, CCR7, CD14, CD180, CD1D, CD2, CD226, CD244, CD247, CD27, CD28, CD3D, CD3E, CD3G, CD4, CD40, CD44, CD5, CD6, CD69, CD7, CD72, CD80, CD83, CD86, CD8A, CDKN1A, CHRNB2, CISH, CLEC5A, CLEC7A, Cmah, CNR1, CORO1A, CXCL10, DAPP1, DDR1, DOK3, F10, FADD, FASLG, FC…	195		Hematological System Development and Function	cell movement	cell movement of phagocytes	1.04e-48	ABCA1, ADAM17, ADIPOQ, ADORA1, ADRB3, AGT, AIF1, ALB, ALCAM, ANGPT1, ANXA1, APOE, ARG1, B4GALT1, BID, BTK, C2, C3, C4A/C4B, C5AR1, C5AR2, C6, CAMK1D, CAPG, CASP1, CCL17, CCL19, CCL2, Ccl2, CCL21, CCL22, CCL3L3, CCL4, CCL5, Ccl9, CCR6, CCR7, CD14, CD28, CD4, CD40, CD44, CD69, CD74, CD80, CD86, CDH1, CEBPE, CES1, CFB, CFH, CKLF, CLEC4M, CNR1, CNR2, COL4A3, CORO1A, CSF1R, CSF2RA, CSF3R, CTSB, CTSE, …	219
Cell Death and Survival	cell death	cell death of liver	9.35e-17	A2M, ABCB4, ADA, ADAR, ADIPOQ, ADRBK1, AHR, APOE, APP, AR, ARF6, ATF7, ATP2A1, BAX, BCL2L11, BID, BUB1, C3, CASP3, CASP7, CASP8, CCND1, CD14, CD274, CD40, CDKN1A, CDKN1B, CEBPB, CFH, CTSB, CXCL10, CXCL3, CYP2E1, DUSP4, E2F1, ESR1, FAAH, FADD, FAS, FGF4, FOS, FOXO3, HGF, HMOX1, HSPD1, IER3, IKBKG, IL10, IL17RA, IL1RN, IL33, IL6, IL6R, INHA, INHBA, IRF1, IRF5, IRF8, ITGB2, ITIH4, LIF, MAP2K1, MAP2K…	119		Cell Death and Survival	cell viability	cell viability of blood cells	3.52e-20	ACTL6A, BAX, BCL2A1, BCL2L11, BCL3, BID, BIRC5, BMP4, BTK, C3, CACNB3, CAMK4, CASP8, CBFB, CCL4, CD22, CD28, CD300A, CD38, CD3E, CD40, CD44, CD80, CD86, CD8A, CHEK2, CISH, CLEC11A, CSF1R, CSF2RA, CSF2RB, CTLA4, CXCR4, DEF6, DLK1, DOCK8, F2R, FANCA, FASLG, FCER1A, FCER1G, FCGR1A, FCGR3A/FCGR3B, FLT3, FN1, FOXO1, GADD45A, GATA1, GATA2, GATA3, GJA1, HBB, HCK, HGF, HIF1A, HSH2D, ICAM1, ICOS, IL10, IL…	143		Hematological System Development and Function	activation	activation of phagocytes	1.66e-25	ACE, ADIPOQ, ADORA1, AGT, AHR, ANGPT1, ANXA1, APOE, ATF3, ATM, BDNF, BID, BTK, C3, C5AR1, C6, CARD9, CASP1, CCL17, Ccl2, CCL2, CCL21, CCL22, CCL4, CCL5, CCR7, CD14, CD1D, CD226, CD300A, CD300LB, CD300LD, CD300LF, CD37, CD4, CD40, CD44, CD63, CD80, CD86, CERK, CFH, CLCN7, CLEC4E, CLEC4M, CLEC5A, CLEC7A, CNR1, CNR2, CRYAA/LOC102724652, CSF1R, CST3, CX3CR1, CXCL10, CXCL3, CXCL6, CYBB, F2RL1, F5, FAS…	153		Hematological System Development and Function	cell movement	cell movement of myeloid cells	1.29e-47	ABCA1, ADAM17, ADIPOQ, ADORA1, ADRB3, AGT, AIF1, ALB, ANGPT1, ANXA1, APOE, ARG1, B4GALT1, BID, BTK, C2, C3, C4A/C4B, C5AR1, C5AR2, C6, CAMK1D, CAPG, CASP1, CBFB, CCL17, CCL19, Ccl2, CCL2, CCL21, CCL22, CCL3L3, CCL4, CCL5, CCR6, CCR7, CD14, CD2, CD28, CD4, CD44, CD69, CD74, CEBPE, CES1, CFB, CFH, CKLF, CNR1, CNR2, COL4A3, CORO1A, CRYAB, CSF1R, CSF2RA, CSF3R, CTSB, CTSE, CTSS, CTSV, CX3CR1, CXADR, …	214
Cell Death and Survival	cell death	cell death of muscle	5.85e-15	ACTC1, ADCY6, ADIPOQ, ADRA1A, ADRB1, AGT, ANKRD1, APP, ARRB2, ATG16L1, BAG1, BCL2L11, BID, BIRC3, BIRC5, BMP10, BMP2, BMP4, BRCA2, C1QTNF9B, CAMP, CASP1, CASP3, CASP8, CASR, CAV3, Ccl2, CD40, CDK2, CDKN1A, CDKN1B, Cdkn1c, CNR2, COQ6, CSF1R, CSK, CYBB, CYCS, DAG1, DPP4, DUSP6, E2F1, E2F3, EEF1A2, EEF1D, FADD, FAS, FOSL1, FOXO1, FOXO3, GATA6, GPX1, GSN, HGF, HIF1A, HK2, HMOX1, HSPB6, HSPB8, HSPD1, …	157		Cell Death and Survival	cell viability	cell viability of leukocytes	1.82e-19	ACTL6A, BAX, BCL2A1, BCL2L11, BCL3, BIRC5, BMP4, BTK, C3, CACNB3, CAMK4, CASP8, CBFB, CCL4, CD22, CD28, CD300A, CD38, CD3E, CD40, CD44, CD80, CD86, CD8A, CHEK2, CISH, CLEC11A, CSF1R, CSF2RA, CSF2RB, CTLA4, CXCR4, DEF6, DLK1, DOCK8, F2R, FASLG, FCER1A, FCER1G, FCGR1A, FCGR3A/FCGR3B, FN1, FOXO1, GATA1, GATA3, HCK, HGF, HIF1A, HSH2D, ICAM1, ICOS, IL10, IL18, IL1B, IL21, IL21R, IL2RB, IL2RG, IL3RA, I…	130		Hematological System Development and Function	activation	activation of myeloid cells	6.23e-25	ACE, ADIPOQ, ADORA1, AGT, AHR, ANGPT1, ANXA1, APOE, ATF3, ATM, BDNF, BID, C3, C5AR1, C6, CASP1, CCL17, Ccl2, CCL2, CCL21, CCL22, CCL4, CCL5, CD14, CD1D, CD226, CD300A, CD300LB, CD300LD, CD300LF, CD4, CD40, CD44, CD63, CD80, CD86, CERK, CFH, CLCN7, CLEC11A, CLEC4E, CLEC5A, CNR1, CNR2, CSF1R, CST3, CX3CR1, CXCL10, CXCL3, CXCL6, CYBB, F2RL1, F5, FASLG, FCER1G, FCGR2A, FCGR2B, FN1, GDNF, GJB1, GRN, H…	144		Hematological System Development and Function	cell movement	cell movement of neutrophils	8.8e-40	ADAM17, ADIPOQ, ADORA1, ADRB3, AGT, ALB, ANXA1, APOE, B4GALT1, BTK, C2, C3, C4A/C4B, C5AR1, C5AR2, CAMK1D, CAPG, CASP1, CCL19, Ccl2, CCL2, CCL21, CCL3L3, CCL4, CCL5, CCR6, CCR7, CD14, CD28, CD44, CD69, CD74, CEBPE, CFB, CFH, CKLF, CORO1A, CSF2RA, CSF3R, CTSB, CXADR, CXCL10, Cxcl3, CXCR1, CYBB, EDN1, EDNRA, F10, F2RL1, FCER1G, FCGR2A, FGR, FUT7, GJB2, GRK6, GRN, GSN, HCK, HGF, HMOX1, HSPB1, ICAM1,…	134
Cell Death and Survival	cell death	cell death of leukemia cell lines	2.23e-14	ABCB1, ABCB4, AHR, AIFM1, AIMP1, APAF1, ARG1, BAX, BCL2A1, BCL2L11, BID, BIRC3, BIRC5, BTG1, C5AR1, CAMP, CASP3, CASP8, CCND1, CD247, CD7, CDC6, CDH1, CDKN1A, CDKN1B, CEACAM1, COL1A1, CSF2RA, CSF2RB, CTSB, CTSD, CXCR4, CYCS, DPP4, E2F1, EPHB6, ESR1, FADD, FAF1, FANCA, FAS, FCER2, FCGR1A, FGR, FKBP5, FOXO3, GFI1B, GSN, GSTA2, GZMB, GZMK, GZMM, HCK, HCLS1, HCST, HGF, HMOX1, HSPA8, IFNAR1, IKBKG, IL…	141		Cell Death and Survival	cytolysis	cytolysis	1.26e-21	ABCB1, ADD2, AMPD3, ANK1, ANXA1, AQP9, ARRB2, B2M, BATF3, BAX, C3, C4A/C4B, C8G, CASP1, CAV1, CD1D, CD226, CD244, CD247, Cd24a, CD28, CD3G, CD4, CD44, CD55, CD7, CD8A, CEBPG, CFB, CFH, CFI, CLDN4, CR2, CTLA4, CX3CR1, EPB42, FASLG, FCER1A, FCER1G, FCGR1A, FCGR2A, FCGR2B, FCGR3A/FCGR3B, FURIN, FUT4, GJA1, GPX1, GSR, GZMA, GZMB, HBA1/HBA2, HBB, HCST, HLA-A, HLA-G, HMOX1, HPRT1, IBSP, IFNAR1, IL11, I…	141		Hematological System Development and Function	activation	activation of T lymphocytes	7.11e-21	ADA, ANXA1, APOE, BCL11B, BCL2L11, BCL3, BTLA, C3, CADM1, CAMK4, CASP8, Ccl2, CCL2, CCL22, CCL4, CCL5, CD1D, CD2, CD226, CD244, CD247, CD27, CD28, CD3D, CD3E, CD3G, CD4, CD40, CD44, CD6, CD7, CD80, CD83, CD86, CD8A, CDKN1A, CISH, CLEC7A, CNR1, CORO1A, CXCL10, DDR1, FADD, FASLG, FCER1G, FGF1, FN1, FOS, FOXJ1, FOXO1, GADD45A, HAVCR2, HGF, HLA-A, HLA-DRA, HSH2D, HSPH1, ICAM1, ICOS, IGF2R, IL12RB2, I…	141		Hematological System Development and Function	cell movement	cell movement of mononuclear leukocytes	2.48e-39	ABCA1, Abcb1b, ACKR2, ADAM17, AGT, AIF1, ANGPT1, ANXA1, APOE, BACH2, BATF, BCL11B, BTK, C3, C6, CBFB, CCL17, CCL19, Ccl2, CCL2, CCL21, CCL22, CCL3L3, CCL4, CCL5, Ccl6, CCR6, CCR7, CCR9, CD1D, CD2, CD226, CD247, CD274, CD28, CD3E, CD4, CD40, CD44, CD69, CD80, CD86, CD8A, CKLF, CNR2, COL4A3, CTSS, CTSV, CX3CR1, CXCL10, CXCL11, CXCL13, CXCL16, Cxcl9, CXCR1, CXCR3, CXCR4, CYSLTR1, CYTIP, DOCK8, EGR2,…	179
Cell Death and Survival	cell death	cell death of fibroblast cell lines	3.74e-14	AATF, ABCB1, ABCC4, ABCE1, ACTB, ADRBK1, AGT, AHR, AIFM1, APAF1, APP, ATG7, ATM, ATP6AP2, BAX, BCL2A1, BCL2L11, BID, BIRC3, BIRC5, BRCA1, BRCA2, CA3, CAMP, CASP3, CASP8, CASP8AP2, CCNB1, CCND1, CCNE1, CD2, CD300LD, CD40, CDC20, CDK1, CDK4, CDKN1A, CDKN1B, Cdkn1c, CEBPB, CHEK1, COMMD4, COPS5, COX5A, CSF1R, CTSB, CTSD, CTSV, DDIAS, DDIT4, DNMT1, DUSP4, E2F1, ECEL1, EGR2, EIF2AK2, EIF2S1, EIF3B, EIF…	185		Cell Death and Survival	cytolysis	cytolysis of blood cells	4.54e-20	ADD2, AMPD3, AQP9, BATF3, BAX, C8G, CD1D, CD226, CD244, CD247, Cd24a, CD3G, CD4, CD44, CD55, CD7, CD8A, CEBPG, CFH, CR2, FASLG, FCER1G, FCGR2A, FUT4, GZMA, HBB, HCST, HLA-A, HLA-G, IFNAR1, IL12A, IL18, IL18R1, IL21, IL21R, IL2RG, IL6, ITGAL, ITGB2, KCNN4, Klre1, Klrk1, LCAT, LCK, LCP2, MSH2, NCR1, NCR3, NFIL3, PFKM, PIGA, PIK3CD, PLCG2, PRDX1, PRF1, PSME2, PTPRC, RHBDD3, SERPINB9, SH2D1A, SLAMF7,…	76		Hematological System Development and Function	activation	activation of antigen presenting cells	9.38e-18	ACE, ADIPOQ, ADORA1, AGT, AHR, ANGPT1, APOE, ATF3, ATM, BDNF, BID, BTK, C3, C6, CARD9, CASP1, Ccl2, CCL2, CCL21, CCL22, CCL4, CCL5, CCR7, CD14, CD1D, CD37, CD4, CD40, CD44, CD80, CD86, CLCN7, CLEC4E, CLEC4M, CLEC7A, CNR2, CRYAA/LOC102724652, CSF1R, CTSS, CX3CR1, CXCL10, CYBB, F2RL1, FASLG, FCER1G, FCGR1A, FCGR2A, FN1, GDNF, GJB1, HAVCR2, HCK, HGF, HLA-A, HLA-DOA, HMOX1, HPSE, HRH1, ICAM1, IL18, I…	120		Hematological System Development and Function	cell movement	cell movement of granulocytes	8.31e-39	ADAM17, ADIPOQ, ADORA1, ADRB3, AGT, ALB, ANXA1, APOE, B4GALT1, BTK, C2, C3, C4A/C4B, C5AR1, C5AR2, CAMK1D, CAPG, CASP1, CBFB, CCL17, CCL19, Ccl2, CCL2, CCL21, CCL3L3, CCL4, CCL5, CCR6, CCR7, CD14, CD2, CD28, CD44, CD69, CD74, CEBPE, CFB, CFH, CKLF, CORO1A, CRYAB, CSF2RA, CSF3R, CTSB, CXADR, CXCL10, CXCL11, Cxcl3, Cxcl9, CXCR1, CXCR3, CYBB, EDN1, EDNRA, F10, F2RL1, FCER1G, FCGR2A, FGR, FUT7, GJB2,…	154
Cell Death and Survival	cell death	cell death of muscle cells	4.95e-14	ACTC1, ADCY6, ADIPOQ, ADRA1A, ADRB1, AGT, ANKRD1, APP, ARRB2, ATG16L1, BAG1, BCL2L11, BID, BIRC3, BIRC5, BMP10, BMP2, BMP4, BRCA2, C1QTNF9B, CAMP, CASP1, CASP3, CASP8, CASR, CAV3, CD40, CDK2, CDKN1A, CDKN1B, Cdkn1c, CNR2, COQ6, CSF1R, CSK, CYBB, CYCS, DAG1, DPP4, DUSP6, E2F1, E2F3, EEF1A2, EEF1D, FADD, FAS, FOSL1, FOXO1, FOXO3, GATA6, GPX1, GSN, HGF, HIF1A, HK2, HMOX1, HSPB6, HSPB8, HSPD1, HSPE1,…	151		Cell Death and Survival	cytolysis	cytolysis of leukocytes	4.04e-19	BATF3, CD1D, CD226, CD244, CD247, CD3G, CD4, CD44, CD7, CD8A, CEBPG, FASLG, FCER1G, FCGR2A, FUT4, GZMA, HCST, HLA-A, HLA-G, IFNAR1, IL12A, IL18, IL18R1, IL21, IL21R, IL2RG, IL6, ITGAL, ITGB2, Klre1, Klrk1, LCK, LCP2, MSH2, NCR1, NCR3, NFIL3, PIK3CD, PLCG2, PRDX1, PRF1, PSME2, PTPRC, RHBDD3, SERPINB9, SH2D1A, SLAMF7, STAT1, TAP1, TAPBP, TBK1, TBX21, TLR9, TNF, TNFSF10, TNFSF14, TOX, TYROBP, VAV1, …	60		Hematological System Development and Function	activation	activation of macrophages	7.19e-15	ACE, ADIPOQ, ADORA1, AGT, AHR, ANGPT1, APOE, ATF3, ATM, BDNF, BID, C3, C6, CASP1, Ccl2, CCL2, CCL21, CCL22, CCL4, CCL5, CD14, CD1D, CD4, CD40, CD44, CLCN7, CLEC4E, CNR2, CSF1R, CX3CR1, CXCL10, CYBB, F2RL1, FCER1G, FN1, GDNF, GJB1, HAVCR2, HCK, HLA-A, HMOX1, HPSE, ICAM1, IL18, IL1B, IL1R1, IL1RL1, IL1RN, IL4R, IL6, INHBA, IRF6, JAK2, LCN2, LEP, LGALS3, MAOB, MIF, MMP9, MSR1, NFIL3, NOS2, NPY, NRG1…	90		Hematological System Development and Function	cell movement	cell movement of lymphocytes	3.73e-33	Abcb1b, ACKR2, ADAM17, AGT, ANXA1, BACH2, BATF, BCL11B, BTK, C3, C6, CBFB, CCL17, CCL19, Ccl2, CCL2, CCL21, CCL22, CCL3L3, CCL4, CCL5, Ccl6, CCR6, CCR7, CCR9, CD1D, CD2, CD226, CD247, CD274, CD28, CD3E, CD4, CD40, CD44, CD69, CD80, CD86, CD8A, CKLF, CNR2, COL4A3, CTSS, CTSV, CX3CR1, CXCL10, CXCL11, CXCL13, CXCL16, Cxcl9, CXCR3, CXCR4, CYSLTR1, CYTIP, DOCK8, EGR2, ESR2, F2RL1, FAM65B, FERMT3, FOS,…	150
Cell Death and Survival	cell death	cell death of liver cells	6.89e-14	ADAR, ADIPOQ, ADRBK1, AHR, APOE, AR, ARF6, ATF7, ATP2A1, BAX, BCL2L11, BID, CASP3, CASP7, CASP8, CCND1, CD274, CD40, CDKN1A, CDKN1B, CEBPB, CFH, CTSB, CXCL10, CXCL3, CYP2E1, DUSP4, E2F1, FAAH, FADD, FAS, FGF4, FOS, FOXO3, HGF, HMOX1, HSPD1, IER3, IKBKG, IL10, IL1RN, IL33, IL6, IL6R, INHA, INHBA, IRF1, IRF5, ITGB2, ITIH4, MAP2K1, MAP2K4, MAPK3, MET, MMP9, MYC, MYCN, MYD88, NCF1, NFKB1, NGF, NGFR, …	95		Cell Death and Survival	cytolysis	cytolysis of lymphocytes	3.79e-18	BATF3, CD1D, CD226, CD244, CD247, CD3G, CD4, CD44, CD7, CD8A, CEBPG, FASLG, FCER1G, FCGR2A, FUT4, GZMA, HCST, HLA-A, HLA-G, IFNAR1, IL12A, IL18, IL18R1, IL21, IL21R, IL2RG, IL6, ITGAL, Klre1, Klrk1, LCK, LCP2, MSH2, NCR1, NFIL3, PIK3CD, PLCG2, PRDX1, PRF1, PSME2, PTPRC, RHBDD3, SERPINB9, SH2D1A, SLAMF7, STAT1, TAP1, TAPBP, TBK1, TBX21, TLR9, TNF, TNFSF10, TNFSF14, TOX, TYROBP, VAV1, XCL1	58		Hematological System Development and Function	activation	activation of natural killer cells	1.52e-12	ADIPOQ, AHR, BTK, CASP8, CCL5, CD1D, CD2, CD226, CD244, CD27, CD28, CD4, CD40, CD44, CD69, CD86, FASLG, FCGR2A, FCGR3A/FCGR3B, FLT3, HLA-G, IL18, IL1B, IL1RL1, IL1RN, IL2RB, IL6, IRF1, ITGAL, ITGB2, Klra4 (includes others), Klra5 (includes others), KLRB1, Klrk1, LEP, LYST, NCR1, NCR3, NFKBIZ, NPY, PIK3CD, PRF1, PRKCQ, RHBDD3, S100A9, SLAMF6, SOCS2, SPN, STAT4, TLR1, TLR9, TNF, TYK2, TYROBP, WAS	55		Hematological System Development and Function	cell movement	cell movement of antigen presenting cells	6.3e-29	ACKR2, ADAM17, ADIPOQ, ADORA1, AGT, ALCAM, ANXA1, APOE, ARG1, B4GALT1, BID, C3, C5AR1, C6, CASP1, CCL17, CCL19, CCL2, Ccl2, CCL21, CCL22, CCL3L3, CCL4, CCL5, Ccl9, CCR6, CCR7, CD40, CD44, CD74, CD80, CD86, CDH1, CES1, CKLF, CLEC4M, CNR1, CNR2, COL4A3, CSF1R, CTSE, CTSZ, CX3CR1, CXCL10, CXCL11, CXCL13, CXCR1, CXCR3, CXCR4, CYBB, DOCK8, EDN1, EDNRB, ELN, GSN, HCLS1, HGF, HMOX1, ICAM1, ICOS, IL10, I…	131
Cell Death and Survival	cell death	cell death of macrophages	1.97e-13	ABCC4, ABCG1, APOE, APP, BIRC3, BIRC5, BTG1, CASP1, CASP3, CASP6, CASP7, CASP8, CD14, CD40, CDKN1A, CEBPB, CTSB, DCN, EIF2AK2, FABP4, FADD, FAS, FOS, GPR132, HIF1A, HMOX1, IFNAR1, IL10, IL18, IL1B, INPP5D, IRF1, ISG15, LGALS3, LYZ, MEFV, MSR1, MYD88, NAMPT, NGF, NLRP3, NOS2, NR4A1, PARP1, PCTP, PIK3AP1, PLA2G4A, PLA2G6, PTPN6, PYCARD, RAN, RIPK1, RIPK3, SERPINA3, SERPINF1, SOAT1, SOD2, STAT1, STA…	66		Cell Death and Survival	cytotoxicity	cytotoxicity	8.62e-21	ABCC3, ABCC5, ADIPOQ, AR, ARRB2, B2M, BRCA1, CASP1, CCL2, CCL5, CCR3, CD1D, CD2, CD226, CD244, CD247, CD27, CD28, CD300A, CD38, CD44, CD5, CD6, CD69, CD96, CHEK1, CORO1A, CTSB, CYBB, CYP2B6, DHFR, DOCK8, FADD, FASLG, FCER1G, FCGR1A, FCGR2A, FCGR3A/FCGR3B, FERMT3, FGR, FN1, FOS, GDNF, GZMA, GZMB, HAVCR2, HCK, HCST, HLA-A, HLA-G, HPRT1, HSPA1A/HSPA1B, ICAM1, ICOS, IFNAR1, IFNGR2, IL10, IL12A, IL12R…	125		Hematological System Development and Function	activation	activation of neutrophils	1.56e-12	AHR, ANXA1, C3, C5AR1, CCL17, CCL2, CCL22, CCL4, CCL5, CD14, CD63, CFH, CST3, CXCL3, CXCL6, F2RL1, FASLG, GRN, HMOX1, IL18, IL1A, IL1B, IL1RN, IL6, ITGAM, ITGB2, LCN2, MIF, PF4, PREX1, RAB27A, SELE, SELL, SLC11A1, TLR2, TLR9, TNF, TNFAIP8L2, UNC13D, VAV1, VAV3, VTCN1	42		Hematological System Development and Function	cell movement	cell movement of T lymphocytes	4.72e-27	ACKR2, ADAM17, AGT, BACH2, BATF, BCL11B, C3, C6, CCL17, CCL19, CCL2, Ccl2, CCL21, CCL22, CCL3L3, CCL4, CCL5, CCR6, CCR7, CCR9, CD274, CD28, CD40, CD44, CD69, CD80, CD86, COL4A3, CTSS, CTSV, CXCL10, CXCL11, CXCL13, CXCL16, Cxcl9, CXCR3, CXCR4, CYSLTR1, DOCK8, EGR2, ESR2, F2RL1, FAM65B, FUT7, FYB, HGF, HLA-A, ICAM1, ICOS, IL10, IL12B, IL17RA, IL18BP, IL1B, INPP5D, ITGA4, ITGB2, ITGB7, ITK, JAK2, JA…	94
Cell Death and Survival	cell death	cell death of antigen presenting cells	2e-13	ABCC4, ABCG1, APOE, APP, BAX, BCL2L11, BIRC3, BIRC5, BTG1, CASP1, CASP3, CASP6, CASP7, CASP8, CCL21, CCR7, CD14, CD40, CDKN1A, CDKN1B, CEBPB, CNR2, CTSB, DCN, EIF2AK2, FABP4, FADD, FAS, FOS, GPR132, HIF1A, HMOX1, IFNAR1, IL10, IL11, IL18, IL1B, INPP5D, IRF1, IRF5, ISG15, LEP, LGALS3, LYZ, MEFV, MSR1, MYD88, NAMPT, NFKB1, NGF, NLRP3, NOS2, NR4A1, OSCAR, PARP1, PCTP, PF4, PIK3AP1, PLA2G4A, PLA2G6, …	80		Cell Death and Survival	cytotoxicity	cytotoxicity of leukocytes	1.77e-19	ADIPOQ, ARRB2, B2M, CASP1, CCL2, CCL5, CCR3, CD1D, CD2, CD226, CD244, CD247, CD27, CD300A, CD38, CD44, CD5, CD6, CD69, CD96, CYBB, DOCK8, FADD, FASLG, FCGR1A, FCGR2A, FCGR3A/FCGR3B, FERMT3, FGR, FN1, GZMA, GZMB, HAVCR2, HCK, HLA-A, HLA-G, HPRT1, HSPA1A/HSPA1B, ICAM1, ICOS, IFNAR1, IFNGR2, IL10, IL12A, IL18, IL21, IL21R, IL6, ITGAL, ITGAM, ITGB2, ITK, Klra4 (includes others), KLRB1, KLRC1, KLRD1, …	92		Hematological System Development and Function	activation	activation of granulocytes	4.39e-12	AHR, ANXA1, C3, C5AR1, CCL17, CCL2, CCL22, CCL4, CCL5, CD14, CD300A, CD63, CFH, CST3, CXCL3, CXCL6, F2RL1, F5, FASLG, FCGR2A, FCGR2B, GRN, HMOX1, IL16, IL18, IL1A, IL1B, IL1RL1, IL1RN, IL6, ITGAM, ITGB2, LCN2, MIF, NPY, PF4, PREX1, RAB27A, SELE, SELL, SLC11A1, TLR2, TLR9, TNF, TNFAIP8L2, UNC13D, VAV1, VAV3, VTCN1	49		Hematological System Development and Function	cell movement	cell movement of macrophages	7.95e-24	ADAM17, ADIPOQ, AGT, ANXA1, APOE, ARG1, B4GALT1, BID, C3, C6, CASP1, Ccl2, CCL2, CCL21, CCL22, CCL3L3, CCL4, CCL5, CCR6, CD44, CD74, CES1, CKLF, CNR1, CNR2, COL4A3, CSF1R, CTSE, CX3CR1, CXCL10, CXCR3, CXCR4, CYBB, EDN1, EDNRB, ELN, GSN, HGF, HMOX1, ICAM1, IL10, IL12B, IL17RA, IL18, IL1B, IL1RN, IL4R, IRF6, Irgm1, ITGAL, ITGB2, LCAT, LEP, LGALS3, LTB, MMP12, MMP7, MST1, NDRG1, NINJ1, NLRP3, NOS1, …	100
Cell Death and Survival	cell death	cell death of tumor cells	6.56e-13	ADIPOQ, AIFM1, AIMP1, ANPEP, ANXA1, ANXA2, APAF1, APP, AR, ATG7, ATM, ATP7B, BAG1, BAX, BCL2L11, BID, BIRC3, BIRC5, BLNK, BMP2, BMP4, BMP6, BRCA1, BTK, C1QTNF4, CA9, CASP1, CASP3, CASP6, CASP8, CD22, CD38, CD40, CD44, CDC45, CDC6, CDH1, CDK1, CDK2, CDKN1A, CDKN1B, CEACAM1, CHEK1, COL18A1, CTSB, CXCL11, CXCR4, CYCS, DPP4, DUSP9, E2F1, EIF2AK2, EMP2, ENO1, EZH2, FADD, FAS, FASN, FLT3, FMOD, FOS, FO…	159		Cell Death and Survival	cytotoxicity	cytotoxicity of cells	3.01e-18	ABCC5, ADIPOQ, AR, ARRB2, B2M, CASP1, CCL2, CCL5, CCR3, CD1D, CD2, CD226, CD244, CD247, CD27, CD28, CD300A, CD38, CD44, CD5, CD6, CD69, CD96, CORO1A, CYBB, DHFR, DOCK8, FADD, FASLG, FCER1G, FCGR1A, FCGR2A, FCGR3A/FCGR3B, FERMT3, FGR, FN1, FOS, GDNF, GZMA, GZMB, HAVCR2, HCK, HCST, HLA-A, HLA-G, HPRT1, HSPA1A/HSPA1B, ICAM1, ICOS, IFNAR1, IFNGR2, IL10, IL12A, IL12RB2, IL18, IL21, IL21R, IL6, ITGAL, …	113		Hematological System Development and Function	proliferation	proliferation of immune cells	2.83e-40	A2M, ABCB1, ABCG1, ACPP, ACTL6A, ADA, ADIPOQ, AHR, AIF1, ANPEP, ANXA1, APOE, ARG1, Art2b, ATM, B3GNT5, BANK1, BATF, BCL11A, BCL2A1, BCL2L11, BCL3, BCL6, BIRC3, BIRC5, BLNK, BMP4, BRCA1, BTG1, BTK, BTLA, C10orf54, C3, C5AR1, CASP3, CASP8, CBFB, CCL2, Ccl2, CCL21, CCL4, CCL5, CCNA2, CCR6, CCR7, CD14, CD180, CD1D, CD2, CD226, CD244, CD247, CD27, CD28, CD300A, CD300C, CD37, CD3E, CD3G, CD4, CD40, CD4…	316		Hematological System Development and Function	cell movement	cell movement of dendritic cells	1.28e-15	ADORA1, AGT, ALCAM, APOE, C3, C5AR1, CCL17, CCL19, CCL2, Ccl2, CCL21, CCL22, CCL3L3, CCL4, CCL5, Ccl9, CCR6, CCR7, CD40, CD44, CD74, CD80, CD86, CDH1, CLEC4M, CTSZ, CXCL10, CXCL11, CXCL13, CXCR1, CXCR3, CXCR4, DOCK8, HCLS1, ICAM1, ICOS, IL10, IL10RA, IL12B, IL18, IL1A, IL1B, IL21R, NINJ1, NLRP10, NLRP3, PIK3CD, PLCG2, PTK2B, PTPN6, RAC2, REN, S1PR4, SELE, SIRPA, SPP1, TLR4, TNF, WAS	59
Cell Death and Survival	cell death	cell death of cervical cancer cell lines	2.15e-12	ABCB1, AIFM1, APP, ARHGAP4, ATG7, ATP2A1, ATP2B1, AURKB, BAG1, BAX, BAZ1A, BCL2A1, BCL2L11, BID, BIRC5, BUB1, CAMP, CASC5, CASP1, CASP3, CASP8, CASP8AP2, CCNB1, CCT4, CDC20, CDC6, CDC7, CDCA2, CDK1, CDKN1A, CDKN1B, CHEK1, CIB1, COX5A, CSF1R, CTSB, CYBA, DAP3, E2F1, EIF2AK2, EIF4E, ESR1, EZR, FADD, FAIM2, FAP, FAS, FOS, GADD45G, GPR132, GZMM, HAUS8, HTRA2, IER3, IKBKE, IL18, IL1B, IL6, IRF1, IRF5,…	146		Cell Death and Survival	cytotoxicity	cytotoxicity of lymphocytes	6.14e-18	ADIPOQ, ARRB2, B2M, CCL2, CCL5, CCR3, CD1D, CD2, CD226, CD244, CD247, CD27, CD300A, CD38, CD44, CD5, CD6, CD69, CD96, DOCK8, FADD, FASLG, FCGR1A, FCGR2A, FCGR3A/FCGR3B, FERMT3, FN1, GZMA, GZMB, HAVCR2, HLA-A, HLA-G, HPRT1, HSPA1A/HSPA1B, ICAM1, ICOS, IFNAR1, IFNGR2, IL10, IL12A, IL18, IL21, IL21R, IL6, ITGAL, ITGB2, ITK, Klra4 (includes others), KLRB1, KLRC1, KLRD1, Klrk1, LAT, LCK, LDLR, MYBL2, …	86		Hematological System Development and Function	proliferation	proliferation of mononuclear leukocytes	3.84e-39	A2M, ABCG1, ACPP, ADA, ADIPOQ, AHR, AIF1, ANPEP, ANXA1, APOE, ARG1, Art2b, ATM, B3GNT5, BANK1, BATF, BCL11A, BCL2A1, BCL2L11, BCL3, BCL6, BIRC3, BIRC5, BLNK, BMP4, BRCA1, BTK, BTLA, C10orf54, C3, C5AR1, CASP3, CASP8, CBFB, CCL2, Ccl2, CCL21, CCL4, CCL5, CCR6, CCR7, CD14, CD180, CD1D, CD2, CD226, CD244, CD247, CD27, CD28, CD300A, CD300C, CD37, CD3E, CD3G, CD4, CD40, CD44, CD5, CD6, CD69, CD72, CD8…	297		Hematological System Development and Function	cell movement	cell movement of hematopoietic cells	5.23e-15	BDNF, CCL19, CCL2, CCL21, CCL22, CCL3L3, CCL4, CCL5, CCR9, CD28, CD44, CD69, CIB1, CXCL10, CXCL11, CXCL13, CXCR3, CXCR4, DDR1, DOCK8, HGF, ICAM1, ITGA4, ITGAL, ITGB2, JAK2, LCP1, MMP9, PLCG2, RGS1, RUNX1, SELE, SELPLG, SPI1, SYK, TCIRG1, TNF, ZAP70	38
Cell Death and Survival	cell death	cell death of breast cancer cell lines	2.31e-12	ABCC4, ADIPOQ, AMH, APAF1, ARHGDIA, ATG7, BAG1, BARD1, BAX, BCAS2, BCL2L11, BID, BIRC3, BIRC5, BRCA1, CAMP, CASP1, CASP3, CASP6, CASP7, CASP8, CCDC80, CCND1, CD247, CD44, CDH1, CDK1, CDK2, CDKN1A, CEACAM1, CHEK1, CLCA2, CXCR3, CYCS, DAB2, DDIT4, DNAJC15, DUSP4, E2F1, EIF4E, ESR1, FADD, FAS, FASN, FBLN1, FBXO5, FKBPL, FOXO3, GPX2, Gsta1, HCAR2, HCST, HDAC9, HGF, HIF1A, HK2, HMOX1, HSPB8, HSPD1, HT…	140		Cell Death and Survival	cytotoxicity	cytotoxicity of natural killer cells	1.27e-15	ADIPOQ, ARRB2, CCL2, CD2, CD226, CD244, CD247, CD27, CD300A, CD38, CD44, CD6, CD69, CD96, DOCK8, FASLG, FCGR1A, FCGR2A, FCGR3A/FCGR3B, FERMT3, FN1, HAVCR2, ICOS, IFNAR1, IL10, IL18, IL21, ITGAL, ITGB2, ITK, Klra4 (includes others), KLRB1, KLRD1, Klrk1, LAT, LCK, LDLR, MYBL2, MYD88, NCR1, NCR3, PAK1, PLCG2, PRF1, PRKCQ, PTK2B, PTPN6, SH2D1A, SLAMF6, SPN, STAT1, STAT4, SYK, TBX21, TGFB1, TLR9, TNFS…	60		Hematological System Development and Function	proliferation	proliferation of lymphocytes	2.18e-38	A2M, ABCG1, ACPP, ADA, ADIPOQ, AHR, AIF1, ANXA1, APOE, ARG1, Art2b, ATM, B3GNT5, BANK1, BATF, BCL11A, BCL2A1, BCL2L11, BCL3, BCL6, BIRC3, BIRC5, BLNK, BMP4, BRCA1, BTK, BTLA, C10orf54, C3, C5AR1, CASP3, CASP8, CBFB, CCL2, Ccl2, CCL21, CCL4, CCL5, CCR6, CCR7, CD14, CD180, CD1D, CD2, CD226, CD244, CD247, CD27, CD28, CD300A, CD300C, CD37, CD3E, CD3G, CD4, CD40, CD44, CD5, CD6, CD69, CD72, CD80, CD83…	292		Hematological System Development and Function	cell movement	cell movement of hematopoietic progenitor cells	5.18e-14	CCL19, CCL2, CCL21, CCL22, CCL3L3, CCL4, CCL5, CCR9, CD28, CD69, CIB1, CXCL10, CXCL11, CXCL13, CXCR3, CXCR4, DDR1, DOCK8, HGF, ICAM1, ITGA4, ITGAL, ITGB2, JAK2, LCP1, MMP9, PLCG2, RGS1, RUNX1, SELPLG, SPI1, SYK, TCIRG1, TNF, ZAP70	35
Cell Death and Survival	cell death	cell death of kidney cells	5.52e-12	AATF, ADORA1, ADRBK1, AGT, ALDH3B1, APOBEC3B, APOE, APP, AR, AREG, ATG7, ATP13A2, ATP1A4, BAX, BCL2A1, BCL2L11, BGN, BID, BIRC3, BIRC5, BRCA2, CASP1, CASP3, CASP7, CASP8, CASR, CCHCR1, CCNB1, CD2, CD44, CDK1, CDK2, CDKN1A, CDKN1B, CYCS, DAP3, DCN, DDN, DUSP4, ECEL1, EIF2AK2, ELOVL4, EMP1, EMP2, EMP3, ERBB4, ESR1, EZR, FADD, FAS, FGF1, FGF4, FGFR4, FOS, FOXO1, GNA13, GPR37, GSN, HGF, HIF1A, HIPK2,…	147		Cell Death and Survival	toxicity	toxicity of cells	2.59e-19	ABCC5, ADIPOQ, AR, ARRB2, B2M, CASP1, CCL2, CCL5, CCR3, CD1D, CD2, CD226, CD244, CD247, CD27, CD28, CD300A, CD38, CD44, CD5, CD6, CD69, CD96, CORO1A, CTSB, CYBB, DHFR, DOCK8, FADD, FASLG, FCER1G, FCGR1A, FCGR2A, FCGR3A/FCGR3B, FERMT3, FGR, FN1, FOS, GDNF, GZMA, GZMB, HAVCR2, HCK, HCST, HLA-A, HLA-G, HPRT1, HSPA1A/HSPA1B, ICAM1, ICOS, IFNAR1, IFNGR2, IL10, IL12A, IL12RB2, IL18, IL1R1, IL1RN, IL21,…	117		Hematological System Development and Function	proliferation	proliferation of T lymphocytes	1.71e-29	A2M, ABCG1, ACPP, AHR, AIF1, ANXA1, APOE, ARG1, Art2b, ATM, BATF, BIRC3, BIRC5, BMP4, BRCA1, BTLA, C10orf54, C3, C5AR1, CASP3, CASP8, CBFB, CCL2, Ccl2, CCL21, CCL4, CCL5, CCR6, CCR7, CD14, CD1D, CD2, CD226, CD244, CD247, CD27, CD28, CD37, CD3E, CD3G, CD4, CD40, CD44, CD5, CD6, CD69, CD80, CD83, CD84, CD86, CD8A, CDKN1A, CDKN2A, CIITA, CISH, CORO1A, CSF2RA, CTSD, CTSZ, CXCR3, CXCR4, CYTIP, DCLRE1C…	234		Hematological System Development and Function	proliferation	proliferation of immune cells	7.65e-57	ABCB1, ABCG1, ACPP, ADA, ADIPOQ, AHR, AIF1, ALB, ANPEP, ANXA1, APOE, ARG1, Art2b, ATM, B3GNT5, BANK1, BATF, BCL2A1, BCL2L11, BIRC3, BIRC5, BLNK, BTG1, BTK, BTLA, C10orf54, C3, C5AR1, CASP8, CBFB, CCL2, Ccl2, CCL21, CCL4, CCL5, CCR6, CCR7, CD14, CD180, CD1D, CD2, CD226, CD244, CD247, CD27, CD274, CD28, CD300A, CD300C, CD37, CD3E, CD3G, CD4, CD40, CD44, CD5, CD6, CD69, CD72, CD74, CD80, CD83, CD84,…	296
Cell Death and Survival	cell death	cell death of heart	6.31e-12	ACTC1, ADCY6, ADIPOQ, ADRA1A, ADRB1, AGT, ATG16L1, BAG1, BCL2L11, BIRC5, BMP10, BRCA2, CASP1, CASP3, CASP8, CASR, CAV3, CDK2, CDKN1A, CDKN1B, CNR2, CSK, CYBB, DPP4, E2F1, E2F3, FADD, FAS, FOSL1, FOXO3, GSN, HGF, HIF1A, HK2, HMOX1, HSPB6, HSPB8, HSPD1, HSPE1, HTR2B, IKBKG, IL1B, IL1RN, IL33, IL6, INHBA, IRAK4, LEP, LEPR, LIF, MAP2K1, MAP2K4, MAP2K6, MAPK11, MAPKAPK2, MDK, MDM2, MYH6, MYLK3, NAMPT,…	103		Cell Death and Survival	killing	killing of cells	2.48e-14	ADM, BAX, BCL2L11, BDNF, BRCA1, CARD9, CASP3, CASP6, CASP7, CD1D, CD22, CD226, CD244, CD247, CD28, CD40, CDKN1A, CDKN2A, CEBPE, CEBPG, CHEK1, CIITA, CLEC4M, CTLA4, CTSD, CXCL10, CXCR1, CYBB, ELANE, EZH2, FASLG, FASN, FHIT, GLRX, GZMB, HIF1A, HLA-A, HLA-G, Hrk, HSPA1A/HSPA1B, IFNAR1, IL10, IL10RA, IL18, IL1B, IL1RL1, ITGB3BP, Klra4 (includes others), KLRC1, LEP, LGALS1, LGALS3, LY9, LYZ, MDM2, MGM…	99		Hematological System Development and Function	proliferation	proliferation of B lymphocytes	2.02e-17	ADA, ATM, B3GNT5, BANK1, BCL11A, BCL2A1, BCL2L11, BCL3, BCL6, BLNK, BTK, BTLA, CASP3, CASP8, CD14, CD180, CD244, CD300A, CD300C, CD3E, CD4, CD40, CD44, CD72, CD80, CD86, CD8A, CDKN1A, CDKN2A, CHRNB2, CLCF1, Cmah, DAPP1, DCLRE1C, DOK1, EZR, FADD, FCGR2B, FCGR3A/FCGR3B, FLT3, GNRH1, HCK, HRH1, HSH2D, IKZF3, IL13RA1, IL17C, IL18, IL1B, IL1RN, IL21R, IL2RB, IL2RG, IL4R, IL6, IL7R, INPP5D, IRF8, KLF2,…	114		Hematological System Development and Function	proliferation	proliferation of mononuclear leukocytes	1.01e-55	ABCG1, ACPP, ADA, ADIPOQ, AHR, AIF1, ANPEP, ANXA1, APOE, ARG1, Art2b, ATM, B3GNT5, BANK1, BATF, BCL2A1, BCL2L11, BIRC3, BIRC5, BLNK, BTK, BTLA, C10orf54, C3, C5AR1, CASP8, CBFB, CCL2, Ccl2, CCL21, CCL4, CCL5, CCR6, CCR7, CD14, CD180, CD1D, CD2, CD226, CD244, CD247, CD27, CD274, CD28, CD300A, CD300C, CD37, CD3E, CD3G, CD4, CD40, CD44, CD5, CD6, CD69, CD72, CD74, CD80, CD83, CD84, CD86, CD8A, CDKN2…	280
Cell Death and Survival	necrosis	necrosis	7.05e-65	A2M, AATF, AATK, ABCB1, ABCB4, ABCC4, ABCC8, ABCE1, ABCG1, ACACA, ACE, ACKR3, ACTB, ACTC1, ACTL6A, ACVR1C, ADA, ADAM17, ADAMTS1, ADAMTS12, ADAR, ADARB1, ADCY6, ADCYAP1R1, ADIPOQ, ADORA1, ADRA1A, ADRB1, ADRBK1, AGT, AHR, AICDA, AIFM1, AIMP1, ALCAM, ALDH1A1, ALDH3A1, ALDH3B1, ALKBH3, AMH, ANKRD1, ANPEP, ANTXR1, ANXA1, ANXA2, AP2A2, APAF1, APEX1, APLN, APOBEC3B, Apoc3, APOE, APP, APRT, AQP7, AR, ARE…	1125		Cellular Growth and Proliferation	proliferation	proliferation of cells	1.21e-75	A2M, AATK, ABCB1, Abcb1b, ABCB4, ABCC2, ABCC3, ABCC4, ABCC5, ABCC9, ABCG1, ABCG2, ACACA, ACE, ACE2, ACER2, ACKR3, ACPP, ACSL4, ACSL5, ACTB, ACTG1, ACTL6A, ACVR1C, ADA, ADAM17, ADAMTS2, ADAMTS4, ADARB1, ADCY1, ADCY6, ADD2, ADIPOQ, ADM, ADORA1, ADRA1A, ADRA1B, ADRA1D, ADRA2B, ADRBK1, AEBP1, AFAP1L1, AGR2, AGT, AHR, AIF1, AJUBA, AK2, AK4, AKR1B1, AKR1B10, ALCAM, ALDH1A1, ALDH1L1, ALDH3A1, ALKBH3, AL…	1515		Hematological System Development and Function	function	function of lymphocytes	1.15e-31	ABCB1, Abcb1b, ADGRE1, AHR, APOE, ATF3, ATM, BACH2, BANK1, BATF3, BCL2L11, BCL3, BCL6, BIRC3, BIRC5, BST1, BTK, BTLA, CACNB3, Ccl2, CCR6, CCR7, CD244, CD247, CD27, CD28, CD3E, CD3G, CD4, CD40, CD44, CD69, CD72, CD80, CD84, CD86, CD8A, CD8B, CIITA, Cmah, CNR2, CTSC, CTSS, CX3CR1, CXCL10, CXCR4, EBI3, ECM1, FCER1G, FCGR2A, FYB, GNRH1, GPR84, GRK6, HAVCR2, HCLS1, HLA-A, HLA-G, HSH2D, ICAM1, ICOS, IF…	158		Hematological System Development and Function	proliferation	proliferation of lymphocytes	4.66e-55	ABCG1, ACPP, ADA, ADIPOQ, AHR, AIF1, ANXA1, APOE, ARG1, Art2b, ATM, B3GNT5, BANK1, BATF, BCL2A1, BCL2L11, BIRC3, BIRC5, BLNK, BTK, BTLA, C10orf54, C3, C5AR1, CASP8, CBFB, Ccl2, CCL2, CCL21, CCL4, CCL5, CCR6, CCR7, CD14, CD180, CD1D, CD2, CD226, CD244, CD247, CD27, CD274, CD28, CD300A, CD300C, CD37, CD3E, CD3G, CD4, CD40, CD44, CD5, CD6, CD69, CD72, CD74, CD80, CD83, CD84, CD86, CD8A, CDKN2A, CHRN…	276
Cell Death and Survival	necrosis	necrosis of epithelial tissue	6.32e-21	AATF, ACE, ADAM17, ADAMTS1, ADAR, ADIPOQ, ADRBK1, AGT, AHR, AIFM1, AIMP1, ALDH1A1, ALDH3A1, ALDH3B1, AMH, APAF1, APLN, APOBEC3B, APP, AR, ARHGAP18, ASS1, ATF7, ATG7, ATM, ATP13A2, ATP1A4, AURKA, BAX, BCL2A1, BCL2L11, BID, BIRC3, BIRC5, BMP4, BMP6, BPI, CA3, CAMP, CASP1, CASP3, CASP7, CASP8, CASR, CCHCR1, CCND1, CD1D, CD40, CD44, CDH1, CDKN1A, CDKN1B, CEACAM1, CEBPB, CHEK1, Clca3a1/Clca3a2, CNP, C…	266		Cellular Growth and Proliferation	proliferation	proliferation of immune cells	9.6e-48	A2M, ABCB1, ABCG1, ACPP, ACTL6A, ADA, ADIPOQ, AHR, AIF1, ANPEP, ANXA1, APOE, ARF6, ARG1, Art2b, ATM, B2M, B3GNT5, BANK1, BATF, BAX, BCL11A, BCL2A1, BCL2L11, BCL3, BIRC3, BIRC5, BLNK, BMP4, BRCA1, BTG1, BTK, C10orf54, C3, C5AR1, CASP3, CASP8, CAV1, CBFB, CBS/CBSL, CCL2, Ccl2, CCL21, CCL4, CCL5, CCNA2, CCR6, CCR7, CD14, CD180, CD1D, CD2, CD209, CD22, CD226, CD244, CD247, Cd24a, CD27, CD276, CD28, C…	410		Hematological System Development and Function	function	function of myeloid cells	6.09e-26	ADIPOQ, AHR, ANPEP, APOE, ATM, BCL2A1, BCL3, BIRC3, CAPG, CARD9, CASP8, Ccl2, CCL2, CCL5, CCR6, CD14, CD9, CLCN2, CLCN3, CLEC4E, CLEC7A, CNR2, CSF1R, CXCL10, CXCL6, CYBB, DOK1, DUSP4, FCER1G, FCGR1A, FCGR2A, FCGR2B, FCMR, FES, FGR, FOS, FUT4, FUT7, GPR68, GRN, GSN, HCK, HLA-G, HSPB1, ICAM1, IDUA, IL18, IL1B, IL1R1, IL1RL1, IL2RG, IL4R, IL6, IRF1, ITGAL, ITGAM, ITGB2, LCP1, LGALS3, LGMN, Lilrb3, L…	113		Hematological System Development and Function	proliferation	proliferation of T lymphocytes	1.26e-44	ABCG1, ACPP, AHR, AIF1, ANXA1, APOE, ARG1, Art2b, ATM, BATF, BIRC3, BIRC5, BTLA, C10orf54, C3, C5AR1, CASP8, CBFB, CCL2, Ccl2, CCL21, CCL4, CCL5, CCR6, CCR7, CD14, CD1D, CD2, CD226, CD244, CD247, CD27, CD274, CD28, CD37, CD3E, CD3G, CD4, CD40, CD44, CD5, CD6, CD69, CD74, CD80, CD83, CD84, CD86, CD8A, CDKN2A, CHRNA1, CISH, CORO1A, CSF2RA, CTSD, CTSZ, CXCR3, CXCR4, CYTIP, DCLRE1C, DOCK8, DOK1, DOK2…	225
Cell Death and Survival	necrosis	necrosis of liver	4.04e-16	A2M, ABCB4, ADA, ADAR, ADIPOQ, ADRBK1, AHR, APOE, AR, ARF6, ATF7, ATP2A1, BAX, BCL2L11, BID, BUB1, C3, CASP3, CASP7, CASP8, CCND1, CD14, CD274, CD40, CDKN1A, CDKN1B, CEBPB, CFH, CTSB, CXCL10, CXCL3, CYP2E1, DUSP4, E2F1, ESR1, FAAH, FADD, FAS, FGF4, FOS, FOXO3, HGF, HMOX1, HSPD1, IER3, IKBKG, IL10, IL17RA, IL1RN, IL33, IL6, IL6R, INHA, INHBA, IRF1, IRF5, IRF8, ITGB2, ITIH4, LIF, MAP2K1, MAP2K4, MA…	117		Cellular Growth and Proliferation	proliferation	proliferation of blood cells	1.29e-46	A2M, ABCB1, ABCG1, ACPP, ACTL6A, ADA, ADIPOQ, AHR, AIF1, ANPEP, ANXA1, APOE, ARF6, ARG1, Art2b, ATG7, ATM, B2M, B3GNT5, BANK1, BATF, BAX, BCL11A, BCL2A1, BCL2L11, BCL3, BIRC3, BIRC5, BLNK, BMP4, BRCA1, BTG1, BTK, C10orf54, C3, C5AR1, CASP3, CASP8, CAV1, CBFB, CBS/CBSL, Ccl2, CCL2, CCL21, CCL3L3, CCL4, CCL5, CCNA2, CCND1, CCR6, CCR7, CD14, CD180, CD1D, CD2, CD209, CD22, CD226, CD244, CD247, Cd24a,…	428		Hematological System Development and Function	function	function of T lymphocytes	2.47e-23	ABCB1, Abcb1b, ADGRE1, ATF3, ATM, BATF3, BCL2L11, BCL3, BCL6, BIRC3, BIRC5, CACNB3, Ccl2, CCR6, CCR7, CD247, CD27, CD28, CD3E, CD3G, CD4, CD44, CD69, CD80, CD84, CD86, CD8A, CD8B, CIITA, Cmah, CTSC, CTSS, CXCL10, EBI3, ECM1, FCER1G, FYB, GNRH1, GPR84, GRK6, HAVCR2, HLA-A, HLA-G, HSH2D, ICAM1, ICOS, IFNGR2, IL10RA, IL13RA1, IL16, IL18, IL1RL1, IL21R, IL4R, IL6, INPP5D, IRF5, IRF7, IRF8, ITGAL, ITK…	116		Hematological System Development and Function	proliferation	proliferation of B lymphocytes	1.12e-21	ADA, ATM, B3GNT5, BANK1, BCL2A1, BCL2L11, BLNK, BTK, BTLA, CASP8, CD14, CD180, CD244, CD300A, CD300C, CD3E, CD4, CD40, CD44, CD72, CD74, CD80, CD86, CD8A, CDKN2A, CHRNA1, CLCF1, Cmah, DAPP1, DCLRE1C, DOK1, EGR2, FCGR2B, FCGR3A/FCGR3B, FLT3, GAPT, HCK, HSH2D, IKZF2, IKZF3, IL10, IL13RA1, IL18, IL1B, IL1RN, IL21R, IL2RB, IL2RG, IL4R, IL7R, INPP5D, IRF4, IRF8, KLF9, LAG3, LCP1, LILRB4, LY86, LY96, L…	104
Cell Death and Survival	necrosis	necrosis of muscle	8.36e-15	ACTC1, ADCY6, ADIPOQ, ADRA1A, ADRB1, AGT, ANKRD1, APP, ARRB2, ATG16L1, BAG1, BCL2L11, BID, BIRC3, BIRC5, BMP10, BMP2, BMP4, BRCA2, C1QTNF9B, CAMP, CASP1, CASP3, CASP8, CASR, CAV3, Ccl2, CD40, CDK2, CDKN1A, CDKN1B, Cdkn1c, CNR2, COQ6, CSF1R, CSK, CYBB, CYCS, DAG1, DPP4, DUSP6, E2F1, E2F3, EEF1A2, EEF1D, FADD, FAS, FOSL1, FOXO1, FOXO3, GATA6, GPX1, GSN, HGF, HIF1A, HK2, HMOX1, HSPB6, HSPB8, HSPD1, …	156		Cellular Growth and Proliferation	proliferation	proliferation of mononuclear leukocytes	5.25e-46	A2M, ABCG1, ACPP, ADA, ADIPOQ, AHR, AIF1, ANPEP, ANXA1, APOE, ARF6, ARG1, Art2b, ATM, B2M, B3GNT5, BANK1, BATF, BAX, BCL11A, BCL2A1, BCL2L11, BCL3, BIRC3, BIRC5, BLNK, BMP4, BRCA1, BTK, C10orf54, C3, C5AR1, CASP3, CASP8, CAV1, CBFB, CBS/CBSL, Ccl2, CCL2, CCL21, CCL4, CCL5, CCR6, CCR7, CD14, CD180, CD1D, CD2, CD209, CD22, CD226, CD244, CD247, Cd24a, CD27, CD276, CD28, CD300A, CD300C, CD37, CD38, C…	384		Hematological System Development and Function	function	function of macrophages	2.51e-21	AHR, ANPEP, APOE, ATM, BCL3, BIRC3, CAPG, CARD9, CASP8, Ccl2, CCL2, CCL5, CCR6, CD14, CD9, CLCN2, CLCN3, CLEC4E, CLEC7A, CNR2, CSF1R, CXCL10, CYBB, DOK1, DUSP4, FCER1G, FCGR1A, FCGR2A, FCGR2B, FES, FGR, FOS, GPR68, GRN, GSN, HCK, HSPB1, ICAM1, IDUA, IL18, IL1B, IL4R, IL6, IRF1, ITGAM, LCP1, LGALS3, LGMN, LY96, LYN, MMP12, MMP7, MSR1, MST1, Mt1, NCEH1, NLRP3, NOD2, NOS2, NPY1R, P2RY6, PCTP, PIK3CD…	85		Hematological System Development and Function	function	function of lymphocytes	1.54e-50	ABCB1, Abcb1b, ADGRE1, AHR, ANG, APOE, ATF3, ATM, BACH2, BANK1, BATF3, BBC3, BCL2L11, BIRC3, BIRC5, BST1, BTK, BTLA, CACNB3, Ccl2, CCR6, CCR7, CD244, CD247, CD27, CD274, CD28, CD3E, CD3G, CD4, CD40, CD44, CD69, CD72, CD74, CD80, CD84, CD86, CD8A, CD8B, Cmah, CNR2, CTSC, CTSS, CX3CR1, CXCL10, CXCL13, CXCR4, EBI3, ECM1, FCER1G, FCGR2A, FYB, GRK6, HAVCR2, HCLS1, HLA-A, HLA-DQB1, HLA-E, HLA-G, HSH2D,…	163
Cell Death and Survival	necrosis	necrosis of tumor	8.62e-14	ADIPOQ, AIFM1, AIMP1, ANPEP, ANXA1, ANXA2, APAF1, APP, AR, ATG7, ATM, ATP7B, BAG1, BAX, BCL2L11, BID, BIRC3, BIRC5, BLNK, BMP2, BMP4, BMP6, BRCA1, BTG1, BTK, C1QTNF4, CA9, CASP1, CASP3, CASP6, CASP8, CD22, CD38, CD40, CD44, CDC45, CDC6, CDH1, CDK1, CDK2, CDKN1A, CDKN1B, CEACAM1, CHEK1, COL18A1, CSF3R, CTSB, CXCL11, CXCR4, CYCS, DPP4, DUSP9, E2F1, EIF2AK2, EMP2, ENO1, EZH2, FADD, FAS, FASN, FLT3, …	165		Cellular Growth and Proliferation	proliferation	proliferation of lymphocytes	2.61e-45	A2M, ABCG1, ACPP, ADA, ADIPOQ, AHR, AIF1, ANXA1, APOE, ARF6, ARG1, Art2b, ATM, B2M, B3GNT5, BANK1, BATF, BAX, BCL11A, BCL2A1, BCL2L11, BCL3, BIRC3, BIRC5, BLNK, BMP4, BRCA1, BTK, C10orf54, C3, C5AR1, CASP3, CASP8, CAV1, CBFB, CBS/CBSL, Ccl2, CCL2, CCL21, CCL4, CCL5, CCR6, CCR7, CD14, CD180, CD1D, CD2, CD209, CD22, CD226, CD244, CD247, Cd24a, CD27, CD276, CD28, CD300A, CD300C, CD37, CD38, CD3E, CD…	378		Hematological System Development and Function	function	function of B lymphocytes	7.78e-12	AHR, BACH2, BANK1, BCL2L11, BCL3, BCL6, BST1, BTK, BTLA, CCR7, CD40, CD72, CIITA, Cmah, CNR2, CTSS, CXCR4, FCGR2A, GNRH1, GRK6, HCLS1, ICOS, IL18, IL2RG, INPP5D, JAK3, LAX1, LCP1, LYN, MR1, PIK3CD, PIK3R1, PLCG2, PLCL2, POLQ, PTPN6, PTPRC, RGS1, RHBDF2, SASH3, SH3BP2, TBC1D10C, TLR9, TNFAIP8L2, VAV1, VAV2, WAS	47		Hematological System Development and Function	function	function of myeloid cells	4.26e-37	ADIPOQ, AHR, ANPEP, APOE, ATM, B4GALT1, BCL2A1, BIRC3, CAPG, CARD9, CASP8, Ccl2, CCL2, CCL5, CCR6, CD14, CEBPE, CLCN3, CLEC4E, CLEC7A, CNR2, CSF1R, CXCL10, CYBB, DOK1, DOK2, FCER1G, FCGR1A, FCGR2A, FCGR2B, FCMR, FES, FGR, FOS, FUT7, GPR68, GRN, GSN, HCK, HLA-G, HSPB1, ICAM1, IL10, IL12B, IL18, IL1B, IL1R1, IL2RG, IL4R, IRF1, ITGAD, ITGAL, ITGAM, ITGB2, LCP1, LGALS3, LGMN, Lilrb3, LY96, LYN, MMP12…	113
Cell Death and Survival	necrosis	necrosis of kidney	4.05e-13	AATF, ADORA1, ADRBK1, AGT, ALDH3B1, APOBEC3B, APOE, APP, APRT, AR, AREG, ATG7, ATP13A2, ATP1A4, BAX, BCL2A1, BCL2L11, BGN, BID, BIRC3, BIRC5, BRCA2, CASP1, CASP3, CASP7, CASP8, CASR, CCHCR1, CCNB1, CD2, CD44, CDK1, CDK2, CDKN1A, CDKN1B, CYCS, DAP3, DCN, DDN, DUSP4, ECEL1, EIF2AK2, ELOVL4, EMP1, EMP2, EMP3, ERBB4, ESR1, EZR, FADD, FAS, FGF1, FGF4, FGFR4, FOS, FOXO1, GNA13, GPR37, GSN, HGF, HIF1A, …	156		Cellular Growth and Proliferation	proliferation	proliferation of T lymphocytes	1.89e-35	A2M, ABCG1, ACPP, AHR, AIF1, ANXA1, APOE, ARF6, ARG1, Art2b, ATM, B2M, BATF, BAX, BIRC3, BIRC5, BMP4, BRCA1, C10orf54, C3, C5AR1, CASP3, CASP8, CAV1, CBFB, CBS/CBSL, CCL2, Ccl2, CCL21, CCL4, CCL5, CCR6, CCR7, CD14, CD1D, CD2, CD209, CD226, CD244, CD247, Cd24a, CD27, CD276, CD28, CD37, CD38, CD3E, CD3G, CD4, CD40, CD44, CD5, CD55, CD6, CD69, CD80, CD83, CD84, CD86, CD8A, CDC25A, CDK2, CDKN1A, CDKN…	305		Hematological System Development and Function	homing	homing of leukocytes	1.76e-30	ACKR2, ADAM17, ADORA1, AIF1, ANGPT1, ANXA1, AOC3, APOE, BATF, C3, C5AR1, C5AR2, CAPG, CCL17, CCL19, Ccl2, CCL2, CCL21, CCL22, CCL3L3, CCL4, CCL5, CCND1, CCR4, CCR6, CCR7, CCR9, CD28, CD4, CD44, CD69, CD9, CDKN1A, CKLF, CNR2, CORO1A, CSF1R, CSF2RA, CSF3R, CST3, CTSE, CX3CR1, CXADR, CXCL10, CXCL11, CXCL14, CXCL16, CXCL2, CXCL3, Cxcl3, CXCL6, Cxcl9, CXCR1, CXCR3, CXCR4, CYBB, CYSLTR1, EDNRA, EDNRB, …	166		Hematological System Development and Function	function	function of T lymphocytes	8.17e-36	ABCB1, Abcb1b, ADGRE1, ANG, ATF3, ATM, BATF3, BBC3, BCL2L11, BIRC3, BIRC5, CACNB3, Ccl2, CCR6, CCR7, CD247, CD27, CD274, CD28, CD3E, CD3G, CD4, CD44, CD69, CD74, CD80, CD84, CD86, CD8A, CD8B, Cmah, CTSC, CTSS, CXCL10, EBI3, ECM1, FCER1G, FYB, GRK6, HAVCR2, HLA-A, HLA-DQB1, HLA-E, HLA-G, HSH2D, ICAM1, ICOS, IFNGR2, IL10, IL10RA, IL12B, IL13RA1, IL18, IL18R1, IL21R, IL4R, INPP5D, IRF5, IRF7, IRF8, …	118
Cell Death and Survival	apoptosis	apoptosis	5.34e-56	A2M, AATF, AATK, ABCA1, ABCB1, ABCE1, ABCG1, ACACA, ACE, ACSL4, ACTC1, ACVR1C, ADA, ADAM17, ADAMTS1, ADAMTSL4, ADAR, ADCY6, ADCYAP1R1, ADIPOQ, ADORA1, ADRA1A, ADRA1B, ADRB1, ADRBK1, AGT, AHR, AIF1, AIFM1, AIMP1, ALCAM, ALDH1A1, ALDH3A1, ALDOC, ALKBH3, AMH, ANGPTL4, ANKRD1, ANPEP, ANTXR1, ANXA1, ANXA2, ANXA7, AP2A2, APAF1, APEX1, APLN, APOBEC3B, APOE, APP, AQP1, AQP7, AR, ARC, AREG, ARF6, ARG1, AR…	1122		Cellular Growth and Proliferation	proliferation	proliferation of tumor cell lines	4.32e-26	A2M, ABCB1, ACACA, ACKR3, ACPP, ACSL4, ACSL5, ACTB, ACVR1C, ADAM17, ADAMTS4, ADIPOQ, ADM, ADRA1B, AGT, AHR, AJUBA, AKR1B10, ALCAM, ALDH1A1, ALDH1L1, ALKBH3, ANGPTL4, ANXA1, ANXA2, ANXA7, APAF1, APEX1, AQP1, AQP5, AR, ARF6, ARG1, ARID3A, ARL11, ARTN, ASCC3, ATAD2, ATF3, ATF5, ATG10, ATG7, ATM, AURKA, AURKB, B3GAT1, BAG1, BARD1, BAX, BDKRB1, BDNF, BID, BIRC2, BIRC5, BMP4, BMP5, BMP6, BNIP3, BRCA1, …	591		Hematological System Development and Function	homing	homing of neutrophils	5.98e-19	ADORA1, C3, C5AR1, C5AR2, CAPG, CCL19, Ccl2, CCL2, CCL21, CCL3L3, CCL4, CCL5, CCR6, CCR7, CD28, CD69, CKLF, CORO1A, CSF2RA, CSF3R, CST3, CXADR, CXCL10, CXCL14, CXCL2, CXCL3, Cxcl3, CXCL6, CXCR1, EDNRA, FASLG, FCER1G, FCGR2A, FGR, GRK6, GRN, GSN, HCK, ICAM1, IL18, IL1B, IL1R1, INPP5D, ITGA4, ITGAM, ITGB2, LCN2, LGALS3, LSP1, LYN, MDK, MYO1F, NCKAP1L, NOD2, PDE4B, PF4, PIK3CD, PIK3R5, PREX1, PRKCA,…	78		Hematological System Development and Function	function	function of macrophages	2.02e-31	AHR, ANPEP, APOE, ATM, BIRC3, CAPG, CARD9, CASP8, CCL2, Ccl2, CCL5, CCR6, CD14, CLCN3, CLEC4E, CLEC7A, CNR2, CSF1R, CXCL10, CYBB, DOK1, DOK2, FCER1G, FCGR1A, FCGR2A, FCGR2B, FES, FGR, FOS, GPR68, GRN, GSN, HCK, HSPB1, ICAM1, IL10, IL12B, IL18, IL1B, IL4R, IRF1, ITGAD, ITGAM, LCP1, LGALS3, LGMN, LY96, LYN, MMP12, MMP7, MSR1, MST1, Mt1, NCEH1, NLRP3, NOD2, NOS2, NPY1R, P2RY6, PCTP, PIK3CD, PLA2G15,…	87
Cell Death and Survival	apoptosis	apoptosis of tumor cell lines	6.86e-34	AATF, AATK, ABCB1, ABCE1, ACACA, ACVR1C, ADAM17, ADIPOQ, ADORA1, ADRBK1, AGT, AHR, AIFM1, AIMP1, ALCAM, ALKBH3, AMH, ANKRD1, ANXA2, AP2A2, APAF1, APOE, APP, AR, AREG, ARG1, ARHGAP4, ARHGDIA, ARL11, ARRB2, ATAD2, ATF1, ATG7, ATM, ATP2A1, AURKA, BAG1, BARD1, BAX, BAZ1A, BCAS2, BCL2A1, BCL2L11, BCL3, BCLAF1, BID, BIRC3, BIRC5, BLNK, BMP2, BMP4, BMP6, BRCA1, BRCA2, BTK, BUB1, C5AR1, CALCB, CAMP, CARD…	528		Cellular Growth and Proliferation	proliferation	proliferation of connective tissue cells	1.33e-18	ACTB, ADIPOQ, ADM, AEBP1, AGT, AHR, AIF1, ANXA2, APLN, APLNR, AQP1, AR, ARID3A, ATF1, ATF3, ATIC, ATM, B4GALT7, BAX, BCL11B, BMP4, BMP6, BRCA1, BRCA2, BTC, BUB1, CAV1, CBX7, CCL2, CCNA2, CCNB1, CCND1, CCNE1, CCNF, CD300A, CD40, CD44, CDH1, CDK2, CDK4, CDKN1A, CDKN1B, Cdkn1c, CDKN2A, CDKN2B, CEBPA, CHGA, CIITA, CIRBP, CNR1, CNR2, COL14A1, COL1A1, CSF1R, CTF1, CTHRC1, CTSB, CTSD, CTSV, CXCL3, CXCR3…	259		Hematological System Development and Function	homing	homing of granulocytes	1.05e-17	ADORA1, ANXA1, C3, C5AR1, C5AR2, CAPG, CCL19, Ccl2, CCL2, CCL21, CCL3L3, CCL4, CCL5, CCR6, CCR7, CD28, CD69, CKLF, CORO1A, CSF2RA, CSF3R, CST3, CXADR, CXCL10, CXCL14, CXCL2, CXCL3, Cxcl3, CXCL6, Cxcl9, CXCR1, CXCR3, EDNRA, FASLG, FCER1G, FCGR2A, FGR, GRK6, GRN, GSN, HCK, ICAM1, IL18, IL1B, IL1R1, INPP5D, ITGA4, ITGAM, ITGB2, LCN2, LGALS3, LSP1, LYN, MDK, MYO1F, NCKAP1L, NOD2, PDE4B, PF4, PIK3CD, …	85		Hematological System Development and Function	function	function of B lymphocytes	1.06e-15	AHR, BACH2, BANK1, BCL2L11, BST1, BTK, BTLA, CCR7, CD40, CD72, Cmah, CNR2, CTSS, CXCL13, CXCR4, FCGR2A, GRK6, HCLS1, HLA-DQB1, ICOS, IL18, IL2RG, INPP5D, IRF4, JAK3, LAX1, LCP1, LYN, MS4A1, PIK3CD, PLCG2, PLCL2, PTPN6, PTPRC, RGS1, RHBDF2, SASH3, SH3BP2, SPPL2A, TBC1D10C, TLR3, TLR9, TNFAIP8L2, VAV1, VAV2, WAS	46
Cell Death and Survival	apoptosis	apoptosis of blood cells	4.73e-30	ABCG1, ADA, ADAM17, ADRB1, AHR, AIMP1, ANPEP, ANXA1, APOE, APP, Art2b, ATF7, ATM, AURKB, BAX, BCL11A, BCL2A1, BCL2L11, BCL3, BID, BIRC3, BIRC5, BLNK, BMP4, BRCA1, BTG1, BTK, CAMP, CASP1, CASP3, CASP6, CASP7, CASP8, CCDC86, CCL2, Ccl2, CCL21, CCL3L3, CCL4, CCNB1, CCR7, CD14, CD2, CD22, CD247, Cd24a, CD27, CD274, CD38, CD40, CD44, CD5, CD7, CD80, CD9, CDK2, CDKN1A, CDKN1B, CEBPB, CHEK1, CHEK2, CHI3…	252		Cellular Growth and Proliferation	proliferation	proliferation of B lymphocytes	3.36e-18	ADA, ATM, B3GNT5, BANK1, BCL11A, BCL2A1, BCL2L11, BCL3, BLNK, BTK, CASP3, CASP8, CD14, CD180, CD22, CD244, Cd24a, CD300A, CD300C, CD38, CD3E, CD4, CD40, CD44, CD72, CD80, CD86, CD8A, CDKN1A, CDKN1B, CDKN2A, CDKN2C, CHRNA1, CHRNB2, CLCF1, Cmah, CR2, CTLA4, DAPP1, DCLRE1C, DOK1, EGR2, EXTL1, EZR, FADD, FCGR2B, FCGR3A/FCGR3B, FLT3, GAPT, HCK, HIF1A, HRH1, HSH2D, IFNAR1, IKZF3, IL10, IL13RA1, IL18, I…	142		Hematological System Development and Function	homing	homing of mononuclear leukocytes	8.29e-15	ACKR2, ADAM17, AIF1, ANGPT1, ANXA1, AOC3, BATF, CCL17, CCL19, Ccl2, CCL2, CCL21, CCL22, CCL4, CCL5, CCR4, CCR6, CCR7, CCR9, CD44, CKLF, CNR2, CXCL10, CXCL11, CXCL16, CXCL3, Cxcl9, CXCR1, CXCR3, CXCR4, CYSLTR1, ELN, F2R, FN1, FOXO1, FUT7, FYB, GNAO1, GNAZ, GNRH1, HLA-G, HP, IL16, IL1B, INHBA, ITGA4, ITGAE, ITGAL, ITGB7, ITK, JAK2, JAK3, LAT, LCP1, LGALS3, MMP9, MST1, MYLK, OPRD1, PF4, PIK3CD, PLA2…	83		Hematological System Development and Function	function	function of granulocytes	9.53e-15	ADIPOQ, B4GALT1, BCL2A1, Ccl2, CD14, CEBPE, CLCN3, CLEC7A, CXCL10, CYBB, FCGR2A, FCMR, FGR, FUT7, HCK, HLA-G, HSPB1, IL10, IL12B, IL1B, IL1R1, IL2RG, ITGAL, ITGAM, ITGB2, LCP1, LYN, MMP9, NCF1, NOS1, PIK3CD, PLAC8, PLAUR, PLCB2, RAC2, RASGRP4, SELE, SELP, SERPINB1, SIGLEC8, SLAMF6, STX11, SYK, TNF	44
Cell Death and Survival	apoptosis	apoptosis of leukocytes	2.81e-29	ABCG1, ADA, ADAM17, ADRB1, AHR, AIMP1, ANPEP, ANXA1, APOE, APP, Art2b, ATM, AURKB, BAX, BCL11A, BCL2A1, BCL2L11, BCL3, BID, BIRC3, BIRC5, BLNK, BMP4, BRCA1, BTG1, BTK, CAMP, CASP1, CASP3, CASP6, CASP7, CASP8, CCDC86, CCL2, Ccl2, CCL21, CCL4, CCNB1, CCR7, CD14, CD2, CD22, CD247, Cd24a, CD27, CD274, CD38, CD40, CD44, CD5, CD80, CD9, CDK2, CDKN1A, CDKN1B, CEBPB, CHEK1, CHEK2, CHI3L1, CIITA, CNR2, CO…	236		Cellular Growth and Proliferation	proliferation	proliferation of fibroblasts	6.12e-16	ACTB, ADIPOQ, AEBP1, AGT, AHR, AIF1, ANXA2, AQP1, ARID3A, ATF3, ATM, B4GALT7, BAX, BMP4, BRCA1, BRCA2, BTC, BUB1, CAV1, CBX7, CCL2, CCNA2, CCNB1, CCND1, CCNE1, CCNF, CD300A, CD40, CD44, CDH1, CDK2, CDK4, CDKN1A, CDKN1B, CDKN2A, CDKN2B, CIRBP, COL14A1, CSF1R, CTF1, CTSD, CXCL3, DDR2, DOK1, E2F1, ELN, ESPL1, ESR1, EZH2, FADD, FANCD2, FEN1, FGF1, FGF10, FGF4, FN1, FNTB, FOS, FOSB, FOSL1, FTH1, GADD4…	157		Hematological System Development and Function	migration	migration of mononuclear leukocytes	2.23e-29	ABCA1, Abcb1b, ACKR2, ADAM17, AGT, ANXA1, AOC3, BACH2, BATF, BCL11B, BTK, C3, C6, CCL17, CCL19, Ccl2, CCL2, CCL21, CCL22, CCL3L3, CCL4, CCL5, Ccl6, CCR4, CCR6, CCR7, CCR9, CD1D, CD2, CD226, CD247, CD28, CD3E, CD4, CD40, CD44, CD69, CD80, CD86, CD8A, COL1A1, COL4A3, CTSS, CTSV, CX3CR1, CXCL10, CXCL11, CXCL16, CXCL3, Cxcl9, CXCR3, CXCR4, CYSLTR1, CYTIP, DOCK8, ESR2, EZR, F2RL1, FAM65B, FASLG, FERMT…	161		Hematological System Development and Function	function	function of neutrophils	1.29e-13	B4GALT1, BCL2A1, Ccl2, CD14, CEBPE, CLCN3, CLEC7A, CYBB, FCGR2A, FGR, FUT7, HCK, HLA-G, HSPB1, IL1B, IL1R1, ITGAL, ITGAM, ITGB2, LCP1, LYN, MMP9, NCF1, NOS1, PIK3CD, PLAC8, PLAUR, PLCB2, RAC2, RASGRP4, SELE, SELP, SERPINB1, SLAMF6, STX11, SYK, TNF	37
Cell Death and Survival	apoptosis	apoptosis of mononuclear leukocytes	2.16e-21	ADA, ADRB1, AHR, AIMP1, APOE, APP, Art2b, ATM, AURKB, BAX, BCL11A, BCL2A1, BCL2L11, BCL3, BID, BLNK, BMP4, BRCA1, BTK, CASP1, CASP3, CASP6, CASP7, CASP8, CCDC86, Ccl2, CCL4, CCNB1, CD2, CD22, CD247, Cd24a, CD27, CD274, CD38, CD40, CD44, CD5, CD80, CD9, CDK2, CDKN1A, CDKN1B, CHEK1, CHEK2, CHI3L1, CIITA, COL1A1, CORO1A, CXCR4, DCK, DHX58, DOCK8, DUSP4, E2F1, EIF2AK2, EIF4E, EZR, FADD, FAS, FCGR1A, …	177		Cellular Growth and Proliferation	proliferation	proliferation of smooth muscle cells	2.71e-15	ABCC2, ABCC4, ACE2, ADIPOQ, ADM, ADRBK1, AGT, AIF1, AKR1B1, ALOX12, ALOX15, APOE, ARG1, BIRC5, BMP4, C1QTNF9B, CACNA1G, CAMK2D, CAV1, CCL2, CCL5, CCND1, CCNE1, CDK4, CDKN1A, CDKN1B, Cdkn1c, CDKN2A, CKLF, CMA1, COMT, CRHR2, CTF1, CXCL16, CYBA, CYP1B1, DDR1, E2F1, E2F3, ELANE, ELN, ESR1, ESR2, FCER1A, FOS, FOXM1, FOXO1, FZD4, GJA1, GNAI1, HAS2, HGF, HIF1A, HMGCR, HMOX1, IGFBP2, IGFBP3, IL10, IL12A,…	131		Hematological System Development and Function	migration	Lymphocyte migration	1.75e-28	Abcb1b, ACKR2, ADAM17, AGT, ANXA1, AOC3, BACH2, BATF, BCL11B, BTK, C3, C6, CCL17, CCL19, Ccl2, CCL2, CCL21, CCL22, CCL3L3, CCL4, CCL5, Ccl6, CCR4, CCR6, CCR7, CCR9, CD1D, CD2, CD226, CD247, CD28, CD3E, CD4, CD40, CD44, CD69, CD80, CD86, CD8A, COL1A1, COL4A3, CTSS, CTSV, CX3CR1, CXCL10, CXCL11, CXCL16, CXCL3, Cxcl9, CXCR3, CXCR4, CYSLTR1, CYTIP, DOCK8, ESR2, EZR, F2RL1, FAM65B, FASLG, FERMT3, FN1,…	151		Hematological System Development and Function	differentiation	differentiation of leukocytes	1.01e-39	ADA, ADAM17, ADAR, ADIPOQ, ADORA1, AGT, AHR, ANXA1, ARNTL, ATM, BACH2, BATF, BATF3, BCL11B, BCL2A1, BCL2L11, BLNK, BMP7, BTK, C1QC, C5AR1, CADM1, CASP8, CBFB, CCL2, CCL21, CCR7, CCR9, CD14, CD1D, CD2, CD226, CD247, CD27, CD274, CD28, CD300A, CD3D, CD3E, CD3G, CD4, CD40, CD6, CD69, CD72, CD74, CD80, CD83, CD86, CD8A, CD8B, CDKN2A, CEBPE, CISH, CLCF1, CLEC5A, CNR2, CSF1R, CSF2RA, CSF3R, CXCL10, CXC…	233
Cell Death and Survival	apoptosis	apoptosis of lymphocytes	2.28e-21	ADA, ADRB1, AHR, AIMP1, APOE, Art2b, ATM, AURKB, BAX, BCL11A, BCL2A1, BCL2L11, BCL3, BID, BLNK, BMP4, BRCA1, BTK, CASP1, CASP3, CASP6, CASP7, CASP8, CCDC86, Ccl2, CCL4, CCNB1, CD2, CD22, CD247, Cd24a, CD27, CD274, CD38, CD40, CD44, CD5, CD80, CD9, CDK2, CDKN1A, CDKN1B, CHEK1, CHEK2, CHI3L1, CIITA, COL1A1, CORO1A, CXCR4, DCK, DHX58, DOCK8, DUSP4, E2F1, EIF2AK2, EIF4E, EZR, FADD, FAS, FCGR1A, FCGR2…	173		Cellular Growth and Proliferation	proliferation	proliferation of muscle cells	4.6e-15	ABCC2, ABCC4, ACE2, ADAM17, ADIPOQ, ADM, ADRBK1, AGT, AIF1, AKR1B1, ALOX12, ALOX15, APOE, ARG1, BDNF, BIRC5, BMP10, BMP4, C1QTNF9B, CACNA1G, CAMK2D, CAV1, CCL2, CCL5, CCND1, CCNE1, CDK2, CDK4, CDKN1A, CDKN1B, Cdkn1c, CDKN2A, CKLF, CMA1, COMT, CRHR2, CTF1, CTSB, CXADR, CXCL10, CXCL16, CYBA, CYP1B1, DDR1, E2F1, E2F3, ELANE, ELN, ESR1, ESR2, FCER1A, FGF1, FN1, FOS, FOXM1, FOXO1, FZD4, GJA1, GNAI1, G…	162		Hematological System Development and Function	migration	T cell migration	4.21e-25	Abcb1b, ACKR2, ADAM17, AGT, AOC3, BACH2, BATF, BCL11B, C3, C6, CCL17, CCL19, Ccl2, CCL2, CCL21, CCL22, CCL3L3, CCL4, CCL5, CCR4, CCR6, CCR7, CCR9, CD28, CD4, CD40, CD44, CD69, CD80, CD86, COL1A1, COL4A3, CTSS, CTSV, CXCL10, CXCL11, CXCL16, Cxcl9, CXCR3, CXCR4, CYSLTR1, DOCK8, ESR2, EZR, F2RL1, FAM65B, FASLG, FN1, FOXO1, FUT4, FUT7, FYB, GNRH1, GRK6, HGF, HLA-A, ICAM1, ICOS, IL16, IL17C, IL17RA, I…	115		Hematological System Development and Function	differentiation	differentiation of blood cells	4.58e-38	ADA, ADAM17, ADAR, ADIPOQ, ADORA1, AGT, AHR, ALAS2, ANGPT1, ANXA1, ARNTL, ATM, BACH2, BATF, BATF3, BCL11B, BCL2A1, BCL2L11, BLNK, BMP7, BTK, C1QC, C5AR1, CADM1, CASP8, CBFB, CCL2, CCL21, CCR7, CCR9, CD14, CD1D, CD2, CD226, CD247, CD27, CD274, CD28, CD300A, CD3D, CD3E, CD3G, CD4, CD40, CD6, CD69, CD72, CD74, CD80, CD83, CD86, CD8A, CD8B, CDKN2A, CEBPE, CIB1, CISH, CLCF1, CLEC5A, CNR2, Crip2, CSF1R…	259
Cell Death and Survival	apoptosis	apoptosis of myeloid cells	1.55e-17	ABCG1, ADAM17, AHR, ANPEP, ANXA1, APOE, APP, BAX, BCL2A1, BID, BIRC3, BIRC5, BTG1, BTK, CAMP, CASP1, CASP3, CASP6, CASP8, CCL2, CD14, CD44, CDK2, CDKN1A, CEBPB, CXCL2, CXCR4, CYBB, DCN, EIF2AK2, FADD, FAS, FCER1G, FCGR1A, FOS, FOXO3, GPR132, GSN, HAVCR2, HCAR2, HIF1A, IL10, IL18, IL1B, IL1RL1, IL1RN, IL33, IL6, INPP5D, IRF1, IRF8, ISG15, ITGAM, ITGB2, JAK2, LEP, LEPR, LGALS1, LGALS3, LYN, MEFV, M…	99		Cellular Growth and Proliferation	proliferation	proliferation of lymphatic system cells	6.13e-15	ABCB1, ABCG2, ACTL6A, ADM, AFAP1L1, ATM, AURKB, BCL3, BIRC5, BMP3, BMP4, BTK, CBFB, CCL2, CCNB1, CCR7, CD180, CD247, CD28, CD3E, CD4, CD40, CD44, CD80, CD86, CD8A, CDC25A, CDKN1A, CDKN1B, CDKN2A, CEBPA, CHRNA1, CISH, CMKLR1, COL2A1, CSF1R, CTLA4, CXCL10, CXCL3, CYSLTR1, CYSLTR2, F2R, FANCA, FASLG, FCGR2B, FGF1, FGFR3, FLT3, FOXM1, GATA1, GATA3, GJA1, HGF, HPRT1, IGF2, IGFBP3, IL10, IL11, IL12RB2,…	108		Hematological System Development and Function	migration	migration of phagocytes	4.68e-21	ABCA1, ADAM17, ADIPOQ, AGT, ALCAM, ANGPT1, ANXA1, AOC3, APOE, C3, CCL17, CCL19, Ccl2, CCL2, CCL21, CCL22, CCL3L3, CCL4, CCL5, Ccl9, CCND1, CCR7, CD40, CD44, CD80, CD86, CDH1, CLEC11A, CLEC4M, COL1A1, CSF1R, CTSS, CTSV, CTSZ, CX3CR1, CXCL10, CXCL11, CXCL2, CXCL3, CXCL6, CXCR3, CXCR4, CYBB, DOCK8, F10, FASLG, FGR, FN1, GREM1, HCK, HCLS1, HGF, ICAM1, ICOS, IL10RA, IL16, IL17RA, IL18, IL1B, IL1RN, IL…	115		Hematological System Development and Function	differentiation	differentiation of mononuclear leukocytes	5.88e-33	ADA, ADAM17, AGT, AHR, ANXA1, ARNTL, ATM, BACH2, BATF, BCL11B, BCL2A1, BCL2L11, BLNK, BTK, C5AR1, CADM1, CASP8, CBFB, CCL2, CCR7, CCR9, CD14, CD1D, CD2, CD226, CD247, CD27, CD274, CD28, CD3D, CD3E, CD3G, CD4, CD40, CD6, CD69, CD72, CD74, CD80, CD83, CD86, CD8A, CD8B, CDKN2A, CISH, CLCF1, CSF1R, CXCR4, DCLRE1C, DNASE2, EGR2, EPHA4, FCGR2B, FLT3, FOS, FZD9, GPR68, GREM1, HAVCR2, HGF, HLA-DOA, HLA-D…	189
Cell Death and Survival	apoptosis	apoptosis of T lymphocytes	3.2e-17	ADA, ADRB1, AHR, APOE, Art2b, ATM, BAX, BCL2A1, BCL2L11, BCL3, BID, BMP4, BRCA1, CASP1, CASP3, CASP6, CASP7, CASP8, CCDC86, Ccl2, CCL4, CCNB1, CD2, CD247, Cd24a, CD27, CD274, CD38, CD44, CD5, CD9, CDK2, CDKN1A, CDKN1B, CHEK1, CHEK2, CHI3L1, CIITA, CORO1A, CXCR4, DCK, DHX58, DOCK8, E2F1, EZR, FADD, FAS, FCGR1A, FOS, FOXO3, Gm21596/Hmgb1, GPR132, GZMB, HIF1A, ICAM1, ICOS, IER3, IKBKE, IL10, IL17C, …	137		Cellular Growth and Proliferation	proliferation	proliferation of fibroblast cell lines	8.38e-14	A2M, ACKR3, ADIPOQ, ADRA1A, ADRA1B, ADRA1D, AHR, AKR1B1, APEX1, ATG12, ATIC, ATM, BATF, BAX, BMP4, BRCA1, BTG1, C1QTNF3, CAV1, CCND1, CCNE1, CD9, CDCA5, CDK4, CDKN1A, CDKN1B, CDKN2A, CDKN2B, CEBPA, CES2, CIRBP, CKS1B, CKS2, COL1A1, COPS5, CSF1R, CSF2RA, CSF2RB, CTSD, CXCL10, CXCL14, DPY30, E2F1, E2F3, E2F7, EEF1D, EGR2, EIF2AK2, EIF3E, EIF3I, ERBB4, ERRFI1, EZH2, F2R, F2RL1, FGF1, FGFR3, FN1, FOS…	179		Hematological System Development and Function	migration	migration of antigen presenting cells	2.83e-14	ADIPOQ, AGT, ALCAM, APOE, C3, CCL17, CCL19, Ccl2, CCL2, CCL21, CCL22, CCL3L3, CCL4, CCL5, Ccl9, CCND1, CCR7, CD40, CD44, CD80, CD86, CDH1, CLEC4M, CSF1R, CTSZ, CXCL10, CXCL11, CXCR3, CXCR4, CYBB, DOCK8, HCLS1, HGF, ICAM1, ICOS, IL10RA, IL16, IL18, IL1B, IL1RN, IL21R, IRF6, ITGAL, LGALS3, MDK, MIF, MMP12, MST1, MYLK, NLRP10, NOS2, P2RY6, PDPN, PTGDS, PTK2B, PTPN6, RAC2, RUNX3, S1PR4, SDC1, SELE, S…	70		Hematological System Development and Function	differentiation	differentiation of lymphocytes	8.12e-31	ADA, ADAM17, AHR, ANXA1, ARNTL, ATM, BACH2, BATF, BCL11B, BCL2A1, BCL2L11, BLNK, BTK, C5AR1, CADM1, CASP8, CBFB, CCR7, CCR9, CD14, CD1D, CD2, CD226, CD247, CD27, CD274, CD28, CD3D, CD3E, CD3G, CD4, CD40, CD6, CD69, CD72, CD74, CD80, CD83, CD86, CD8A, CD8B, CDKN2A, CISH, CLCF1, CXCR4, DCLRE1C, DNASE2, EGR2, EPHA4, FCGR2B, FLT3, FOS, FZD9, HAVCR2, HLA-DOA, HLA-DQA1, HLA-DQB1, HLA-G, HMGA1, ICAM1, I…	174
Cell Death and Survival	apoptosis	apoptosis of phagocytes	5.32e-17	ABCG1, ADAM17, AHR, ANPEP, ANXA1, APOE, APP, BAX, BCL2A1, BCL2L11, BID, BIRC3, BIRC5, BTG1, BTK, CAMP, CASP1, CASP3, CASP6, CASP8, CCL2, CCL21, CCR7, CD14, CD40, CD44, CDKN1A, CDKN1B, CEBPB, CNR2, CXCL2, CXCR4, CYBB, DCN, EIF2AK2, FADD, FAS, FCER1G, FOS, FOXO3, GPR132, GSN, HAVCR2, HCAR2, HIF1A, IL10, IL11, IL18, IL1B, IL1RL1, IL1RN, IL33, IL6, INPP5D, IRF1, IRF5, ISG15, ITGB2, LEP, LEPR, LGALS3,…	98		Cellular Growth and Proliferation	proliferation	proliferation of neuronal cells	1.5e-13	A2M, AATK, ADAM17, ADCY6, ANGPT1, ANKRD6, APEX1, APOE, AR, ARF6, ARG1, ARTN, ASPM, ATM, B2M, BAG1, BAIAP2, BAX, BCAN, BDNF, BMP4, BMP6, BTC, CAMK1, CAMK4, CAV1, Ccl2, CCND1, Cd24a, CD9, CDK1, CDK2, CDK4, CDK5, CDK5R1, CDKN1A, CDKN1B, CDKN2C, CNR1, CNR2, CNTF, CNTN2, CORO1B, CX3CR1, DDR1, DISC1, DLL1, DOK4, DOK5, DOK6, DPYSL3, DPYSL5, E2F1, E2F3, EFNB3, ELMO2, ENPP2, ERBB4, ESR1, ESR2, EZR, FAM107…	237		Hematological System Development and Function	migration	migration of myeloid cells	5.51e-12	ADAM17, ADORA1, ANXA1, AOC3, C3, CCL17, Ccl2, CCL2, CCL3L3, CCL4, CCL5, CD44, CLEC11A, CXCL10, CXCL11, CXCL2, CXCL3, CXCL6, CYBB, F10, FASLG, FGR, FN1, HCK, HMOX1, ICAM1, IL16, IL17RA, IL18, IL1B, IL6, INPP5D, ITGA4, ITGAL, ITGAM, ITGB2, LEP, LSP1, MDK, MMP7, MMP9, MYLK, NLRP3, NOS2, P2RY6, PDE4B, PIK3CD, PIK3R1, PIK3R5, PLAUR, PLCB2, PRKCQ, PTGDS, S100A8, S100A9, SELE, SELL, SELP, SELPLG, SEMA4D…	62		Hematological System Development and Function	differentiation	differentiation of T lymphocytes	1.73e-22	ADA, ADAM17, AHR, ANXA1, ATM, BATF, BCL11B, BCL2A1, BCL2L11, C5AR1, CBFB, CCR9, CD1D, CD2, CD226, CD247, CD274, CD28, CD3D, CD3E, CD3G, CD4, CD6, CD69, CD74, CD80, CD83, CD86, CD8A, CD8B, CDKN2A, CISH, CXCR4, DCLRE1C, DNASE2, EGR2, EPHA4, FCGR2B, HAVCR2, HLA-DOA, HLA-DQA1, HLA-G, HMGA1, ICAM1, ICOS, IFNGR2, IGF2, IGF2R, IL10, IL12B, IL12RB2, IL17RA, IL18, IL18R1, IL1B, IL1R1, IL1RL2, IL21R, IL2RB…	127
Cell Death and Survival	apoptosis	apoptosis of epithelial cells	7.47e-14	AATF, ACE, ADAR, ADIPOQ, ADRBK1, AHR, ALDH1A1, AMH, APAF1, APP, ATF7, ATM, AURKA, BAX, BCL2A1, BCL2L11, BID, BIRC5, BMP6, CAMP, CASP1, CASP3, CASP7, CASP8, CASR, CCND1, CD1D, CD40, CDH1, CDKN1A, CDKN1B, CEACAM1, CEBPB, CHEK1, Clca3a1/Clca3a2, CTSB, CTSS, CXCL10, DCN, DSG3, E2F1, EIF4E, ENG, ESR1, ESR2, FADD, FAS, HGF, HIPK2, IGFBP5, IKBKG, IL10, IL11, IL18, IL1B, IL6, IL6R, INHBA, IRF1, IRF5, ITI…	130		Cellular Growth and Proliferation	stimulation	stimulation of cells	1.8e-20	ADORA1, AGT, ANGPT1, BDNF, BMP4, BMP5, BMP6, C3, C5AR1, CACNA1C, CAV1, CCK, CCL2, CCL21, CCL22, CCL5, CCNA2, CCND1, CD1D, CD2, CD209, Cd24a, CD28, CD3E, CD4, CD40, CD5, CD69, CD80, CD82, CD83, CD86, CD8A, CDKN2B, CHRNA1, CHRNB2, CLEC11A, CLEC4E, CLEC4M, CNTF, CTLA4, CXCL10, CXCL11, CXCL13, CXCL3, CYCS, DRD1, FAAH, FASLG, FDPS, FGD3, FGF7, FN1, FOS, GAL, GDNF, Gm21596/Hmgb1, GUCY2C, HAVCR2, HCN1, …	151		Hematological System Development and Function	migration	NK cell migration	1.18e-11	Ccl2, CCL2, CCL21, CCL22, CCL3L3, CCL5, Ccl6, CCR7, CD1D, CD226, CD40, CD44, CX3CR1, CXCL10, CXCR3, FERMT3, HLA-G, IL16, PIK3CD, PRKCQ, S1PR5, SELE, SELL, SELP, TLR2, TNF, XCL1	27		Hematological System Development and Function	differentiation	differentiation of B lymphocytes	1.62e-13	ADAM17, AHR, ARNTL, ATM, BACH2, BCL2L11, BLNK, BTK, CASP8, CD14, CD27, CD40, CD69, CD72, CD74, CLCF1, CXCR4, DCLRE1C, FLT3, FOS, FZD9, HMGA1, ICOS, IKZF3, IL10, IL18, IL21R, IL2RB, IL2RG, IL7R, INHBA, INPP5D, IRF4, IRF8, JAK3, KLHL6, LAT, LCP1, LGALS3, LYL1, LYN, MGAT2, MLLT11, MYCN, MZB1, NCKAP1L, NTRK1, PIK3AP1, PIK3CD, PLCG2, PRDM1, PTPN6, PTPRC, RASSF5, RUNX1, SATB1, SIGLEC10, SNAI3, SPI1, SP…	71
Cell Death and Survival	apoptosis	apoptosis of muscle	1.13e-13	ACTC1, ADCY6, ADIPOQ, ADRA1A, ADRB1, AGT, APP, ARRB2, ATG16L1, BAG1, BCL2L11, BIRC5, BMP10, BMP2, BMP4, BRCA2, C1QTNF9B, CASP1, CASP3, CASP8, CASR, CAV3, CD40, CDK2, CDKN1A, Cdkn1c, COQ6, CSF1R, CSK, CYBB, CYCS, DAG1, DUSP6, E2F1, E2F3, EEF1D, FADD, FAS, FOSL1, FOXO1, FOXO3, GATA6, GPX1, GSN, HGF, HIF1A, HMOX1, HSPB6, HSPB8, HSPD1, HSPE1, HTR2B, IKBKE, IKBKG, IL11, IL18, IL1A, IL1B, IL1RN, IL33, …	121		Cellular Growth and Proliferation	stimulation	stimulation of lymphocytes	1.33e-13	C3, CAV1, CD1D, CD2, CD209, Cd24a, CD28, CD3E, CD4, CD40, CD5, CD69, CD80, CD82, CD83, CD86, CDKN2B, CHRNA1, CLEC4E, CTLA4, CXCL10, CXCL11, CYCS, FASLG, FN1, Gm21596/Hmgb1, HAVCR2, HLA-G, HMOX1, ICOS, IL10, IL11, IL12A, IL18, IL1RN, IL21, IL6, IRF6, ITK, KLRC1, KLRD1, Klrk1, LCN2, LEP, LGALS1, LILRB4, MSLN, MYD88, PDCD1, PTPRC, SLAMF1, SPN, STEAP1, TGFB1, TNF, TNFRSF18, TNFRSF1B, TNFRSF9, TNFSF10…	65		Hematological System Development and Function	infiltration	infiltration of leukocytes	3.03e-29	ABCB4, ADA, ADAM17, ADIPOQ, AGT, ANXA1, APOE, ARG1, BCL11B, BID, C2, C3, C6, CASP1, CBFB, CCL19, Ccl2, CCL2, CCL21, CCL22, CCL3L3, CCL4, CCL5, CCR6, CCR7, CD14, CD2, CD44, CD80, CD86, CES1, CFH, CFTR, CIITA, CLEC5A, CMA1, CNR1, CNR2, COL4A3, CRYAB, CSF1R, CTSB, CXCL10, CXCL16, CXCL2, CXCL3, CYBB, CYSLTR1, EGLN3, ESR1, ESR2, F2R, F2RL1, FASLG, FCER1G, FCGR2B, FN1, FUT4, FUT7, GFAP, GJB2, HCK, HGF,…	168		Hematological System Development and Function	adhesion	adhesion of immune cells	1.65e-38	ADAM17, ADGRE5, ADIPOQ, ADORA1, AGT, ALCAM, ALOX12, ALOX15, ANGPT1, ANXA1, APOA4, APOE, B4GALT1, BTK, C1QA, C3, CACNA1C, CCL17, CCL19, CCL2, Ccl2, CCL21, CCL22, CCL3L3, CCL4, CCL5, CCR7, CD14, CD2, CD200R1, CD28, CD300LD, CD4, CD40, CD44, CD6, CD69, CD74, CD83, CDH1, CLEC4M, Cmah, CNR1, CNR2, CORO1A, CSF3R, CTSZ, CX3CR1, CXCL10, CXCL11, CXCL13, CXCR1, CXCR3, CXCR4, F10, FAM65B, FCGR1A, FCGR2A, FC…	147
Cell Death and Survival	apoptosis	apoptosis of muscle cells	1.64e-13	ACTC1, ADCY6, ADIPOQ, ADRA1A, ADRB1, AGT, APP, ARRB2, ATG16L1, BAG1, BCL2L11, BIRC5, BMP10, BMP2, BMP4, BRCA2, C1QTNF9B, CASP1, CASP3, CASP8, CASR, CAV3, CD40, CDK2, CDKN1A, Cdkn1c, COQ6, CSF1R, CSK, CYBB, CYCS, DAG1, DUSP6, E2F1, E2F3, EEF1D, FADD, FAS, FOSL1, FOXO1, FOXO3, GATA6, GPX1, GSN, HGF, HIF1A, HMOX1, HSPB6, HSPB8, HSPD1, HSPE1, HTR2B, IKBKE, IKBKG, IL11, IL18, IL1A, IL1B, IL1RN, IL33, …	120		Cellular Growth and Proliferation	stimulation	stimulation of blood cells	1.76e-13	ADORA1, ANGPT1, BMP4, C3, C5AR1, CAV1, CCL2, CCL5, CD1D, CD2, CD209, Cd24a, CD28, CD3E, CD4, CD40, CD5, CD69, CD80, CD82, CD83, CD86, CDKN2B, CHRNA1, CLEC4E, CLEC4M, CTLA4, CXCL10, CXCL11, CXCL3, CYCS, FASLG, FN1, Gm21596/Hmgb1, HAVCR2, HGF, HLA-G, HMOX1, ICOS, IGF2, IL10, IL11, IL12A, IL18, IL1B, IL1R1, IL1RN, IL21, IL4R, IL6, IRF6, ITK, KLRC1, KLRD1, Klrk1, LCN2, LEP, LGALS1, LGALS3, LIF, LILRB…	86		Hematological System Development and Function	infiltration	infiltration of granulocytes	7.93e-22	ADAM17, ADIPOQ, AGT, ANXA1, APOE, C2, C3, CASP1, CBFB, CCL19, CCL21, CCL4, CCL5, CCR7, CD14, CD2, CD44, CFH, CFTR, CMA1, CRYAB, CTSB, CXCL10, CXCL2, CXCL3, F2R, F2RL1, FASLG, FCER1G, FUT4, FUT7, GJB2, HCK, HGF, HMOX1, HSPB1, ICAM1, IL17RA, IL18, IL1A, IL1B, IL1R1, IL1RL1, IL1RN, IL2RB, IL4R, IL6, IRF6, ITGAL, ITGAM, ITGB2, ITK, JAK3, LCN2, LTC4S, MDK, MMP12, MMP8, MMP9, MSR1, MYLK, NCF1, NOS2, NT…	97		Hematological System Development and Function	adhesion	adhesion of mononuclear leukocytes	3.93e-18	AGT, ANXA1, BTK, CCL17, CCL19, CCL2, CCL21, CCL22, CCL4, CCL5, CCR7, CD2, CD28, CD44, CXCL11, CXCR1, CXCR3, FAM65B, FERMT3, FUT7, FYB, HGF, ICAM1, ICOS, IL10, IL1A, IL1B, ITGA4, ITGAL, ITGAM, ITGB2, ITK, JAK2, JAK3, LCP1, LIF, LIPG, Ly6a (includes others), MAP4K1, OSM, PLAUR, PTPN6, RASGRP1, RASSF5, RGS1, SELE, SELL, SELP, SELPLG, SKAP1, SPN, SPP1, TERT, THBS1, THBS2, TLR2, TLR4, TNF, VAV1, ZAP70	60
Cell Death and Survival	apoptosis	apoptosis of leukemia cell lines	7.56e-13	AHR, AIFM1, AIMP1, APAF1, ARG1, BAX, BCL2A1, BCL2L11, BID, BIRC3, BIRC5, C5AR1, CAMP, CASP3, CASP8, CCND1, CD7, CDC6, CDH1, CDKN1A, CDKN1B, CEACAM1, COL1A1, CSF2RA, CSF2RB, CTSD, CXCR4, CYCS, DPP4, E2F1, EPHB6, ESR1, FADD, FAF1, FANCA, FAS, FCER2, FCGR1A, FGR, FKBP5, FOXO3, GFI1B, GSN, GSTA2, GZMB, GZMM, HCK, HCLS1, HGF, HMOX1, HSPA8, IKBKG, IL6, INHBA, INPP5D, ITGAM, JAK2, KLF5, LCK, LGALS1, LGA…	123		Cellular Growth and Proliferation	stimulation	stimulation of leukocytes	1.99e-13	ADORA1, ANGPT1, BMP4, C3, C5AR1, CAV1, CCL2, CCL5, CD1D, CD2, CD209, Cd24a, CD28, CD3E, CD4, CD40, CD5, CD69, CD80, CD82, CD83, CD86, CDKN2B, CHRNA1, CLEC4E, CLEC4M, CTLA4, CXCL10, CXCL11, CXCL3, CYCS, FASLG, FN1, Gm21596/Hmgb1, HAVCR2, HLA-G, HMOX1, ICOS, IGF2, IL10, IL11, IL12A, IL18, IL1B, IL1RN, IL21, IL4R, IL6, IRF6, ITK, KLRC1, KLRD1, Klrk1, LCN2, LEP, LGALS1, LGALS3, LIF, LILRB4, MSLN, MYD…	84		Hematological System Development and Function	infiltration	infiltration by neutrophils	2.41e-17	ADAM17, ADIPOQ, AGT, ANXA1, APOE, C2, C3, CASP1, CCL21, CCL4, CD14, CD44, CFH, CFTR, CTSB, CXCL10, CXCL2, CXCL3, F2RL1, FASLG, FCER1G, FUT4, FUT7, GJB2, HGF, HMOX1, HSPB1, ICAM1, IL17RA, IL18, IL1A, IL1B, IL1R1, IL1RN, IL6, IRF6, ITGAL, ITGAM, ITGB2, JAK3, LCN2, MDK, MMP12, MMP8, MMP9, NCF1, NOS2, NT5E, PF4, PLAT, PLCB2, PLTP, PRDM1, PRKCA, PTGER3, RAB27A, RAC2, REN, RSPO3, SELE, SELL, SELP, SOCS…	73		Hematological System Development and Function	adhesion	adhesion of phagocytes	5.34e-18	ADAM17, ADORA1, ALCAM, ALOX12, ALOX15, ANXA1, BTK, CCL2, CCL5, CD44, CDH1, CNR1, CORO1A, CSF3R, CTSZ, CXCR1, FERMT3, GLRX, HCK, HPSE, ICAM1, ICOS, IL10, IL1A, IL1B, INPP5D, Irgm1, ITGA4, ITGAL, ITGAM, ITGB2, ITGB7, LCP1, LIPG, LYN, PF4, PIK3CD, PLA2G6, PLAUR, PLTP, PRKCQ, RAC2, S100A8, S100A9, SELE, SELL, SELP, SELPLG, SERPINA1, SIRPA, SPI1, TERT, THY1, TLR2, TLR4, TNF, VAV1, VAV3	58
Cell Death and Survival	apoptosis	apoptosis of antigen presenting cells	4.03e-12	ABCG1, APOE, APP, BCL2L11, BIRC3, BIRC5, BTG1, CASP1, CASP3, CASP6, CASP8, CCL21, CCR7, CD14, CD40, CDKN1A, CDKN1B, CEBPB, CNR2, DCN, EIF2AK2, FADD, FAS, FOS, GPR132, HIF1A, IL10, IL11, IL18, IL1B, INPP5D, IRF1, IRF5, ISG15, LEP, LGALS3, MEFV, MSR1, MYD88, NAMPT, NFKB1, NGF, NOS2, OSCAR, PARP1, PCTP, PF4, PIK3AP1, PLA2G4A, PLA2G6, PTPN6, RIPK1, RIPK3, SERPINA3, SERPINF1, SOAT1, SOD2, STAT1, STAT3…	68		Cellular Growth and Proliferation	stimulation	stimulation of mononuclear leukocytes	2.21e-13	ANGPT1, C3, CAV1, CCL2, CD1D, CD2, CD209, Cd24a, CD28, CD3E, CD4, CD40, CD5, CD69, CD80, CD82, CD83, CD86, CDKN2B, CHRNA1, CLEC4E, CTLA4, CXCL10, CXCL11, CYCS, FASLG, FN1, Gm21596/Hmgb1, HAVCR2, HLA-G, HMOX1, ICOS, IL10, IL11, IL12A, IL18, IL1RN, IL21, IL6, IRF6, ITK, KLRC1, KLRD1, Klrk1, LCN2, LEP, LGALS1, LILRB4, MSLN, MYD88, PDCD1, PTPRC, SLAMF1, SPN, STEAP1, TGFB1, TNF, TNFRSF18, TNFRSF1B, TN…	68		Hematological System Development and Function	infiltration	infiltration by mononuclear leukocytes	1.2e-15	AGT, APOE, BCL11B, C3, C6, CBFB, CCL19, Ccl2, CCL2, CCL21, CCL22, CCL3L3, CCL4, CCR7, CD44, CD80, CD86, CIITA, COL4A3, CXCL10, CXCL16, ESR1, ESR2, F2RL1, FASLG, FN1, GJB2, HCK, HLA-A, HMOX1, ICOS, IL16, IL17C, IL17RA, IL18, IL18BP, IL1B, IL6, IRF6, ITGA4, ITK, JAK3, KCNK2, LAG3, LTB, MIF, MMP12, MMP9, MYLK, NFKBIZ, NLRP3, OSM, PDCD1, PF4, PIK3CD, PIK3R1, PRF1, PRKCQ, REN, RETN, SELE, SELP, SELPLG…	75		Hematological System Development and Function	adhesion	adhesion of myeloid cells	7.08e-16	ADAM17, ADGRE5, ADORA1, ANXA1, C3, CD300LD, CD44, CORO1A, CSF3R, CXCR1, F10, FERMT3, FGR, GLRX, HCK, HPSE, ICAM1, ICOS, IL1B, INPP5D, ITGA4, ITGAL, ITGAM, ITGB2, LCP1, LGALS3, LYN, PF4, PIK3CD, PLAUR, PLTP, PRKCQ, S100A8, S100A9, SELE, SELL, SELP, SELPLG, SERPINA1, THY1, TLR2, TLR4, TNF, TNR, VAV1, VAV3	46
Cell Death and Survival	apoptosis	apoptosis of fibroblast cell lines	4.49e-12	AATF, ABCB1, ABCE1, ADRBK1, AGT, AHR, AIFM1, APAF1, APP, ATM, ATP6AP2, BAX, BCL2A1, BCL2L11, BID, BIRC3, BRCA1, CA3, CAMP, CASP3, CASP8, CASP8AP2, CCNB1, CCNE1, CD2, CD40, CDC20, CDK1, CDK4, CDKN1A, CDKN1B, Cdkn1c, CEBPB, COPS5, COX5A, CSF1R, DDIAS, DDIT4, DNMT1, DUSP4, E2F1, ECEL1, EIF2AK2, EIF2S1, EIF3B, EIF3I, EIF4EBP1, EPHX1, ERBB4, ESR1, FADD, FAF1, FAS, FES, FOXO3, GNA13, GRID2, GSN, GZMB, …	140		Cellular Growth and Proliferation	expansion	expansion of cells	1.67e-18	ABCB1, AHR, ANGPT1, ATG7, ATM, B2M, BCL3, BIRC5, BMP4, BTC, BTK, C3, C5AR1, CASP8, CCL19, CCND1, CCR6, CCR7, CD180, CD2, CD209, CD244, Cd24a, CD27, CD28, CD3E, CD4, CD40, CD55, CD69, CD80, CD86, CDH1, CDKN1A, CDKN1B, CDKN2C, CEBPA, CLCN3, CMKLR1, CR2, CSF1R, CSF2RB, CTLA4, CTSD, CXCR3, DEF6, DLL1, DOK1, ELANE, FASLG, FCGR2B, FLT3, GATA1, GATA2, GJA1, GRAP2, HAVCR2, HIF1A, HMOX1, ICOS, IFNAR1, IL1…	146		Hematological System Development and Function	infiltration	infiltration of phagocytes	5.59e-13	ADAM17, ADIPOQ, AGT, ANXA1, APOE, ARG1, BID, C3, C6, CASP1, Ccl2, CCL2, CCL4, CCR6, CD44, CES1, CFTR, CNR1, CNR2, COL4A3, CSF1R, CXCL10, CYBB, EGLN3, HGF, HMOX1, ICAM1, IL16, IL17C, IL17RA, IL18, IL1B, IL1RN, IL6, IRF6, ITGB2, LCAT, LEP, LTB, MIF, MMP12, MMP9, NDRG1, NFKBIZ, NINJ1, NLRP3, NOS1, PDCD1, PLTP, PRCP, PRDM1, PRKCQ, PTK2B, RAC2, REN, RETN, S100B, SELE, SELL, SELP, SEMA3E, SOD3, STC1, T…	70		Hematological System Development and Function	adhesion	adhesion of granulocytes	1.16e-15	ADAM17, ADGRE5, ADORA1, ANXA1, C3, CD300LD, CD44, CORO1A, CSF3R, CXCR1, F10, FERMT3, FGR, GLRX, HCK, HPSE, ICAM1, ICOS, IL1B, INPP5D, ITGA4, ITGAL, ITGAM, ITGB2, LCP1, LGALS3, LYN, PF4, PIK3CD, PLAUR, PLTP, PRKCQ, S100A8, S100A9, SELE, SELL, SELP, SELPLG, SERPINA1, THY1, TLR2, TLR4, TNF, VAV1, VAV3	45
Cell Death and Survival	survival	cell survival	1.32e-37	ABCB1, Abcb1b, ABCB4, ABCC3, ACE, ACKR3, ACSL5, ACTL6A, ADAM17, ADAMTS1, ADAR, ADIPOQ, ADORA1, ADRBK1, AEN, AHR, AICDA, AIFM1, AIMP1, ALCAM, ALKBH3, AMH, ANTXR1, APAF1, APEX1, APLN, APOE, APP, AR, AREG, ASCC3, ASS1, ATF1, ATF5, ATG7, ATM, ATP7B, AURKA, AURKB, BAG1, BARD1, BAX, BCL2A1, BCL2L11, BCL3, BCLAF1, BID, BIRC5, BMP2, BMP4, BMP6, BRCA1, BRCA2, BTC, BTK, C11orf31, C1QTNF4, C3, C5AR2, CA2, C…	612		Cellular Growth and Proliferation	expansion	expansion of blood cells	1.78e-18	ABCB1, AHR, ATG7, B2M, BCL3, BMP4, BTK, C3, C5AR1, CASP8, CCND1, CCR6, CCR7, CD180, CD2, CD209, CD244, Cd24a, CD27, CD28, CD3E, CD4, CD40, CD55, CD69, CD80, CD86, CDKN1B, CDKN2C, CEBPA, CR2, CSF1R, CTLA4, CTSD, CXCR3, DEF6, DLL1, DOK1, ELANE, FCGR2B, FLT3, GATA1, GATA2, GRAP2, HAVCR2, HMOX1, ICOS, IFNAR1, IL10, IL10RA, IL18, IL1B, IL21, IL21R, IL4R, IL6, IL7R, INHBA, IRF1, ITK, JAK3, KLF2, Klrk1,…	116		Hematological System Development and Function	differentiation	differentiation of leukocytes	1.5e-28	ADA, ADAM17, ADIPOQ, ADORA1, AGT, AHR, ANXA1, ARNTL, ATM, BACH2, BATF, BATF3, BCL11A, BCL11B, BCL2A1, BCL2L11, BCL3, BCL6, BLK, BLNK, BMP4, BTK, C5AR1, CADM1, CAMK4, CASP8, CBFB, CCL2, CCL21, CCR7, CCR9, CD14, CD1D, CD2, CD226, CD247, CD27, CD28, CD300A, CD3D, CD3E, CD3G, CD4, CD40, CD6, CD69, CD72, CD80, CD83, CD86, CD8A, CD8B, CDKN1A, CDKN2A, CDKN2B, CIITA, CISH, CLCF1, CLEC11A, CLEC5A, CNR2, C…	252		Hematological System Development and Function	adhesion	adhesion of lymphocytes	1.86e-15	ANXA1, BTK, CCL17, CCL19, CCL2, CCL21, CCL22, CCL4, CCR7, CD2, CD28, CD44, CXCL11, CXCR3, FAM65B, FERMT3, FUT7, FYB, HGF, ICAM1, ICOS, IL1B, ITGA4, ITGAL, ITGB2, ITK, JAK2, JAK3, LIF, Ly6a (includes others), MAP4K1, OSM, PTPN6, RASGRP1, RASSF5, RGS1, SELE, SELL, SELP, SELPLG, SKAP1, SPN, SPP1, THBS1, THBS2, TLR4, TNF, ZAP70	48
Cell Death and Survival	cell viability	cell viability	2.69e-36	ABCB1, Abcb1b, ABCB4, ABCC3, ACE, ACKR3, ACSL5, ACTL6A, ADAM17, ADAMTS1, ADAR, ADIPOQ, ADORA1, ADRBK1, AEN, AICDA, AIFM1, AIMP1, ALKBH3, AMH, ANTXR1, APAF1, APEX1, APLN, APOE, APP, AR, AREG, ASCC3, ASS1, ATF1, ATF5, ATG7, ATM, ATP7B, AURKA, AURKB, BAG1, BARD1, BAX, BCL2A1, BCL2L11, BCL3, BCLAF1, BID, BIRC5, BMP2, BMP4, BMP6, BRCA1, BRCA2, BTC, BTK, C11orf31, C1QTNF4, C3, C5AR2, CA2, CA9, CACNB3, …	570		Cellular Growth and Proliferation	expansion	expansion of leukocytes	1.82e-18	ABCB1, AHR, B2M, BCL3, BTK, C3, C5AR1, CASP8, CCR6, CCR7, CD180, CD2, CD209, CD244, Cd24a, CD27, CD28, CD3E, CD4, CD40, CD55, CD69, CD80, CD86, CDKN1B, CDKN2C, CEBPA, CR2, CSF1R, CTLA4, CTSD, CXCR3, DEF6, DOK1, ELANE, FCGR2B, FLT3, GRAP2, HAVCR2, HMOX1, ICOS, IFNAR1, IL10, IL10RA, IL18, IL1B, IL21, IL21R, IL4R, IL6, IL7R, IRF1, ITK, JAK3, KLF2, Klrk1, LAG3, LCP1, LCP2, LEP, LEPR, LY9, LYN, MET, M…	106		Hematological System Development and Function	differentiation	differentiation of blood cells	4.27e-28	ADA, ADAM17, ADIPOQ, ADORA1, AGT, AHR, ALAS2, ANGPT1, ANXA1, ARNTL, ATM, BACH2, BAIAP2, BATF, BATF3, BCL11A, BCL11B, BCL2A1, BCL2L11, BCL3, BCL6, BLK, BLNK, BMP4, BRCA2, BTK, C5AR1, CADM1, CAMK4, CASP3, CASP8, CBFB, CCL2, CCL21, CCR7, CCR9, CD14, CD1D, CD2, CD226, CD247, CD27, CD28, CD300A, CD3D, CD3E, CD3G, CD4, CD40, CD6, CD69, CD72, CD80, CD83, CD86, CD8A, CD8B, CDKN1A, CDKN2A, CDKN2B, CIB1, C…	286		Hematological System Development and Function	adhesion	adhesion of neutrophils	1.34e-13	ADAM17, ADORA1, ANXA1, CD44, CORO1A, CSF3R, CXCR1, FERMT3, GLRX, HPSE, ICAM1, IL1B, INPP5D, ITGAL, ITGAM, ITGB2, LCP1, LYN, PF4, PIK3CD, PLAUR, PLTP, PRKCQ, S100A8, S100A9, SELE, SELL, SELP, SELPLG, SERPINA1, TLR2, TLR4, TNF, VAV1, VAV3	35
Cell Death and Survival	cell viability	cell viability of blood cells	7.9e-17	ACTL6A, AICDA, APP, BAX, BCL2A1, BCL2L11, BCL3, BID, BIRC5, BMP4, BTK, C3, CACNB3, CASP8, CBFB, CCL4, CD19, CD22, CD300A, CD38, CD40, CD44, CD80, CD86, CD8A, CEBPB, CHEK2, CLEC11A, CSF1R, CSF2RA, CSF2RB, CXCR4, DEF6, DOCK8, F2R, FANCA, FAS, FCER1G, FCGR1A, FCGR3A/FCGR3B, FLT3, FOXO1, FOXO3, GATA3, GJA1, HBB, HCK, HGF, HIF1A, HSH2D, ICAM1, ICOS, IKBKG, IL10, IL11, IL17C, IL18, IL1B, IL21R, IL2RB, …	137		Cellular Growth and Proliferation	expansion	expansion of T lymphocytes	2.06e-18	AHR, B2M, C3, C5AR1, CASP8, CCR6, CCR7, CD2, CD209, CD244, Cd24a, CD27, CD28, CD3E, CD4, CD40, CD55, CD69, CD80, CD86, CDKN1B, CTLA4, CTSD, CXCR3, DEF6, DOK1, GRAP2, HAVCR2, ICOS, IFNAR1, IL10, IL18, IL1B, IL21, IL21R, IL4R, IL6, IL7R, IRF1, ITK, JAK3, KLF2, Klrk1, LAG3, LCP1, LCP2, LEP, LEPR, LY9, MYD88, NOS1, PARP1, PCGF2, PDCD1, PIK3CB, PIK3CD, PIM1, PLP1, PPARG, PRF1, SERPINB9, SHH, SLAMF1, S…	84		Hematological System Development and Function	differentiation	differentiation of mononuclear leukocytes	1.31e-22	ADA, ADAM17, AGT, AHR, ANXA1, ARNTL, ATM, BACH2, BATF, BCL11A, BCL11B, BCL2A1, BCL2L11, BCL3, BCL6, BLK, BLNK, BMP4, BTK, C5AR1, CADM1, CASP8, CBFB, CCL2, CCR7, CCR9, CD14, CD1D, CD2, CD226, CD247, CD27, CD28, CD3D, CD3E, CD3G, CD4, CD40, CD6, CD69, CD72, CD80, CD83, CD86, CD8A, CD8B, CDKN2A, CIITA, CISH, CLCF1, CSF1R, CST3, CXCR4, DCLRE1C, DNASE2, ESR1, EZR, FADD, FCGR2B, FLT3, FOS, FOXO1, FZD8,…	201		Hematological System Development and Function	infiltration	infiltration of leukocytes	3.23e-37	ABCB4, ADA, ADAM17, ADIPOQ, ADRB3, AGT, ANXA1, APOE, ARG1, B4GALT1, BCL11B, BID, C2, C3, C4A/C4B, C6, CASP1, CBFB, CCL19, Ccl2, CCL2, CCL21, CCL22, CCL3L3, CCL4, CCL5, CCR6, CCR7, CD14, CD2, CD274, CD44, CD80, CD86, CES1, CFB, CFH, CLEC5A, CNR1, CNR2, COL4A3, CRYAB, CSF1R, CTSB, CXCL10, CXCL16, CYBB, CYSLTR1, EDN1, ESR2, F2RL1, FCER1G, FCGR2B, FUT7, GJB2, HCK, HGF, HLA-A, HMOX1, HSPB1, ICAM1, ICO…	156
Cell Death and Survival	cell viability	cell viability of leukocytes	1.22e-15	ACTL6A, AICDA, APP, BAX, BCL2A1, BCL2L11, BCL3, BIRC5, BMP4, BTK, C3, CACNB3, CASP8, CBFB, CCL4, CD19, CD22, CD300A, CD38, CD40, CD44, CD80, CD86, CD8A, CEBPB, CHEK2, CLEC11A, CSF1R, CSF2RA, CSF2RB, CXCR4, DEF6, DOCK8, F2R, FAS, FCER1G, FCGR1A, FCGR3A/FCGR3B, FOXO1, FOXO3, GATA3, HCK, HGF, HIF1A, HSH2D, ICAM1, ICOS, IKBKG, IL10, IL17C, IL18, IL1B, IL21R, IL2RB, IL2RG, IL33, IL3RA, IL6, IL7R, INPP…	123		Cellular Growth and Proliferation	expansion	expansion of lymphocytes	2.67e-17	AHR, B2M, BCL3, BTK, C3, C5AR1, CASP8, CCR6, CCR7, CD180, CD2, CD209, CD244, Cd24a, CD27, CD28, CD3E, CD4, CD40, CD55, CD69, CD80, CD86, CDKN1B, CDKN2C, CR2, CTLA4, CTSD, CXCR3, DEF6, DOK1, FCGR2B, GRAP2, HAVCR2, ICOS, IFNAR1, IL10, IL18, IL1B, IL21, IL21R, IL4R, IL6, IL7R, IRF1, ITK, JAK3, KLF2, Klrk1, LAG3, LCP1, LCP2, LEP, LEPR, LY9, MYBL1, MYD88, NOS1, PARP1, PCGF2, PDCD1, PIK3CB, PIK3CD, PIM…	93		Hematological System Development and Function	differentiation	differentiation of lymphocytes	2.83e-21	ADA, ADAM17, AHR, ANXA1, ARNTL, ATM, BACH2, BATF, BCL11A, BCL11B, BCL2A1, BCL2L11, BCL3, BCL6, BLK, BLNK, BMP4, BTK, C5AR1, CADM1, CASP8, CBFB, CCR7, CCR9, CD14, CD1D, CD2, CD226, CD247, CD27, CD28, CD3D, CD3E, CD3G, CD4, CD40, CD6, CD69, CD72, CD80, CD83, CD86, CD8A, CD8B, CDKN2A, CIITA, CISH, CLCF1, CXCR4, DCLRE1C, DNASE2, ESR1, EZR, FADD, FCGR2B, FLT3, FOS, FOXO1, FZD8, FZD9, HAVCR2, HDAC9, HL…	185		Hematological System Development and Function	infiltration	infiltration of granulocytes	5.5e-27	ADAM17, ADIPOQ, ADRB3, AGT, ANXA1, APOE, B4GALT1, C2, C3, C4A/C4B, CASP1, CBFB, CCL19, CCL21, CCL4, CCL5, CCR7, CD14, CD2, CD44, CFB, CFH, CRYAB, CTSB, CXCL10, F2RL1, FCER1G, FUT7, GJB2, HCK, HGF, HMOX1, HSPB1, ICAM1, IL10, IL12B, IL17RA, IL18, IL1A, IL1B, IL1R1, IL1RN, IL2RB, IL4R, IRF6, ITGAD, ITGAL, ITGAM, ITGB2, ITK, JAK3, LCN2, MMP12, MMP8, MMP9, MSR1, NCF1, NOS2, NT5E, OLFM4, OSM, PF4, PGF,…	91
Cell Death and Survival	cell viability	cell viability of tumor cell lines	5.09e-14	ABCC3, ACE, ACKR3, ACSL5, ADAM17, ADAMTS1, ADRBK1, AEN, AIFM1, AIMP1, ALKBH3, ANTXR1, APEX1, APP, AR, ASCC3, ATF1, ATG7, ATM, ATP7B, AURKA, AURKB, BAG1, BARD1, BAX, BCL2A1, BCL2L11, BCLAF1, BIRC5, BMP2, BRCA1, BRCA2, C11orf31, C5AR2, CA2, CA9, Calm1 (includes others), CAMK2B, CARS, CASP1, CASP3, CASP8, CCL2, CCNA2, CCNB1, CCND1, CD38, CD40, CD44, CD82, CDH1, CDK2, CDK20, CDKN1A, CDKN1B, CEBPB, CE…	298		Cellular Growth and Proliferation	expansion	expansion of mononuclear leukocytes	8.95e-17	AHR, B2M, BCL3, BTK, C3, C5AR1, CASP8, CCR6, CCR7, CD180, CD2, CD209, CD244, Cd24a, CD27, CD28, CD3E, CD4, CD40, CD55, CD69, CD80, CD86, CDKN1B, CDKN2C, CR2, CSF1R, CTLA4, CTSD, CXCR3, DEF6, DOK1, FCGR2B, GRAP2, HAVCR2, ICOS, IFNAR1, IL10, IL10RA, IL18, IL1B, IL21, IL21R, IL4R, IL6, IL7R, IRF1, ITK, JAK3, KLF2, Klrk1, LAG3, LCP1, LCP2, LEP, LEPR, LY9, MYBL1, MYD88, NOS1, PARP1, PCGF2, PDCD1, PIK3…	95		Hematological System Development and Function	differentiation	differentiation of T lymphocytes	3.16e-15	ADA, ADAM17, AHR, ANXA1, ATM, BATF, BCL11A, BCL11B, BCL2A1, BCL2L11, BCL3, BCL6, BMP4, C5AR1, CBFB, CCR9, CD1D, CD2, CD226, CD247, CD28, CD3D, CD3E, CD3G, CD4, CD6, CD69, CD80, CD83, CD86, CD8A, CD8B, CDKN2A, CIITA, CISH, CXCR4, DCLRE1C, DNASE2, FADD, FCGR2B, FOXO1, FZD8, HAVCR2, HLA-DOA, HLA-G, HMGA1, ICAM1, ICOS, IFNGR2, IGF2, IGF2R, IL12RB2, IL17RA, IL18, IL1B, IL1R1, IL1RL1, IL1RL2, IL21R, IL…	134		Hematological System Development and Function	infiltration	infiltration by neutrophils	9.26e-24	ADAM17, ADIPOQ, ADRB3, AGT, ANXA1, APOE, B4GALT1, C2, C3, C4A/C4B, CASP1, CCL21, CCL4, CD14, CD44, CFB, CFH, CTSB, CXCL10, F2RL1, FCER1G, FUT7, GJB2, HGF, HMOX1, HSPB1, ICAM1, IL10, IL17RA, IL18, IL1A, IL1B, IL1R1, IL1RN, IRF6, ITGAD, ITGAL, ITGAM, ITGB2, JAK3, LCN2, MMP12, MMP8, MMP9, NCF1, NOS2, NT5E, PF4, PGF, PLCB2, PLTP, PRDM1, PRKCA, RAB27A, RAC2, REN, SELE, SELL, SELP, SERPINA1, SOCS3, SPP…	72
Cell Death and Survival	cytotoxicity	cytotoxicity	9.99e-17	ABCC3, ABCC5, ADAR, ADIPOQ, APP, AR, ARRB2, BRCA1, CASP1, CCL2, CCR3, CD1D, CD2, CD226, CD244, CD247, CD27, CD300A, CD38, CD44, CD5, CD6, CD96, CEACAM1, CHEK1, CLEC12B, CORO1A, CTSB, CYBB, CYP2B6, DHFR, DOCK8, FADD, FAS, FCER1G, FCGR1A, FCGR2A, FCGR3A/FCGR3B, FERMT3, FGR, FOS, FOXP3, GABRD, GDNF, GZMB, HAVCR2, HCK, HCST, HLA-A, HLA-E, HLA-G, HPRT1, ICAM1, ICOS, IFNAR1, IFNGR2, IKBKG, IL10, IL12RB…	118		Cellular Growth and Proliferation	formation	formation of blood cells	1.29e-15	ANGPTL4, B2M, BAX, BCL11B, BCL2L11, BIRC5, BRCA1, CASP3, CASP8, CBFB, CCL2, CCND1, CCR9, CD3D, CD3E, CD3G, CD83, CDKN1A, CDKN1B, CDKN2A, CIB1, CXCR4, CYCS, DCK, DLL1, DOCK8, DUSP10, EEF1D, EGR2, F5, GATA1, GATA2, GATA3, GRAP2, GREM1, HIF1A, HMOX1, IL10, IL11, IL1RL1, IL21R, IL2RB, IL2RG, IL6, IL7R, INHBA, INSL3, IRF1, IRF8, JAK2, JAK3, KIT, Klra4 (includes others), LAT, LAT2, LAX1, LCP2, LDLR, LM…	96		Hematological System Development and Function	differentiation	differentiation of B lymphocytes	5.35e-12	ADAM17, AHR, ARNTL, ATM, BACH2, BCL11A, BCL2L11, BCL3, BCL6, BLK, BLNK, BTK, CASP8, CD14, CD27, CD40, CD69, CD72, CLCF1, CXCR4, DCLRE1C, ESR1, EZR, FLT3, FOS, FZD9, HDAC9, HMGA1, Hmgb3, ICOS, IKZF3, IL17C, IL18, IL21R, IL2RB, IL2RG, IL6, IL7R, INHBA, INPP5D, IRF8, JAK3, KLHL6, LAT, LCP1, LGALS3, LIG4, LYL1, LYN, MGAT2, MLLT11, MSH2, MXD3, MYCN, NCKAP1L, PIK3AP1, PIK3CD, PIK3R1, PLCG2, POU2F2, PRD…	81		Hematological System Development and Function	infiltration	infiltration of phagocytes	1.86e-17	ADAM17, ADIPOQ, AGT, ANXA1, APOE, ARG1, BID, C3, C6, CASP1, CCL2, Ccl2, CCL4, CCR6, CD44, CES1, CNR1, CNR2, COL4A3, CSF1R, CXCL10, CYBB, EDN1, HGF, HMOX1, ICAM1, IL10, IL17RA, IL18, IL1B, IL1RN, IRF6, ITGB2, LCAT, LEP, LTB, MMP12, MMP9, NDRG1, NINJ1, NLRP3, NOS1, PDCD1, PLA2G4A, PLTP, PRDM1, PRKCQ, PTGES, PTK2B, RAC2, REN, S100B, SELE, SELL, SELP, SEMA3E, SOCS1, SOD3, SPP1, SREBF1, STC1, TLR2, TL…	67
Cell Death and Survival	cytotoxicity	cytotoxicity of leukocytes	4.3e-16	ADIPOQ, ARRB2, CASP1, CCL2, CCR3, CD1D, CD2, CD226, CD244, CD247, CD27, CD300A, CD38, CD44, CD5, CD6, CD96, CEACAM1, CLEC12B, CYBB, DOCK8, FADD, FAS, FCGR1A, FCGR2A, FCGR3A/FCGR3B, FERMT3, FGR, FOXP3, GZMB, HAVCR2, HCK, HLA-A, HLA-E, HLA-G, HPRT1, ICAM1, ICOS, IFNAR1, IFNGR2, IL10, IL18, IL21R, IL6, ITGAL, ITGAM, ITGB2, KLRB1, KLRD1, Klrk1, LAT, LCK, LYN, MYBL2, MYD88, NCR1, NCR3, NFATC2, NFKB1, …	87		Cellular Growth and Proliferation	formation	formation of leukocytes	4.6e-15	ANGPTL4, B2M, BAX, BCL11B, BCL2L11, BIRC5, BRCA1, CBFB, CCL2, CCND1, CCR9, CD3D, CD3E, CD3G, CD83, CDKN1A, CDKN1B, CDKN2A, CXCR4, DCK, DLL1, DOCK8, DUSP10, EEF1D, EGR2, F5, GATA2, GATA3, GRAP2, GREM1, HMOX1, IL10, IL1RL1, IL21R, IL2RB, IL2RG, IL6, IL7R, INHBA, INSL3, IRF1, IRF8, JAK3, KIT, Klra4 (includes others), LAT, LAT2, LAX1, LCP2, LDLR, LMO2, LTB, LYN, MLLT11, NAB1, NFIL3, PDCD1, PIK3CD, PI…	81		Hematological System Development and Function	recruitment	recruitment of leukocytes	4.52e-27	ADAM17, ADIPOQ, AGT, AHR, ANXA1, AOC3, APOE, BTLA, C3, C5AR1, CARD9, CASP1, CCL17, CCL19, Ccl2, CCL2, CCL21, CCL22, CCL3L3, CCL4, CCL5, Ccl6, Ccl7, CCR4, CCR6, CCR7, CD14, CD28, CD4, CD40, CD44, CD5L, CD69, CD8A, CLEC4E, CLEC7A, CNR2, CRYAB, CSF1R, CTSC, CX3CR1, CXCL10, CXCL11, CXCL16, CXCL2, CXCL3, Cxcl9, CXCR3, CXCR4, CYP1A1, F13A1, F2RL1, FASLG, FCGR2A, FCGR2B, FCGR3A/FCGR3B, FN1, FOS, FUT7, F…	140		Hematological System Development and Function	infiltration	infiltration of macrophages	2.12e-17	ADAM17, ADIPOQ, AGT, ANXA1, APOE, ARG1, BID, C3, C6, CASP1, CCL2, Ccl2, CCR6, CD44, CES1, CNR1, CNR2, COL4A3, CSF1R, CXCL10, CYBB, EDN1, HGF, HMOX1, ICAM1, IL10, IL17RA, IL18, IL1B, IL1RN, IRF6, ITGB2, LCAT, LEP, LTB, NDRG1, NINJ1, NLRP3, NOS1, PDCD1, PLA2G4A, PLTP, PRDM1, PRKCQ, PTGES, PTK2B, RAC2, REN, S100B, SELL, SELP, SEMA3E, SOCS1, SOD3, SPP1, SREBF1, STC1, TLR2, TLR3, TNF, TNFAIP8L2, TSHR	62
Cell Death and Survival	cytotoxicity	cytotoxicity of cells	2.82e-15	ABCC5, ADIPOQ, APP, AR, ARRB2, CASP1, CCL2, CCR3, CD1D, CD2, CD226, CD244, CD247, CD27, CD300A, CD38, CD44, CD5, CD6, CD96, CEACAM1, CLEC12B, CORO1A, CYBB, DHFR, DOCK8, FADD, FAS, FCER1G, FCGR1A, FCGR2A, FCGR3A/FCGR3B, FERMT3, FGR, FOS, FOXP3, GDNF, GZMB, HAVCR2, HCK, HCST, HLA-A, HLA-E, HLA-G, HPRT1, ICAM1, ICOS, IFNAR1, IFNGR2, IKBKG, IL10, IL12RB2, IL18, IL21R, IL6, ITGAL, ITGAM, ITGB2, KLRB1,…	108		Cellular Growth and Proliferation	formation	formation of hematopoietic progenitor cells	1.33e-13	B2M, BAX, BCL11B, BCL2L11, BIRC5, BRCA1, CBFB, CCND1, CCR9, CD3D, CD3E, CD3G, CD83, CDKN1A, CDKN1B, CDKN2A, CXCR4, DCK, DLL1, EEF1D, EGR2, F5, GATA2, GATA3, GRAP2, HIF1A, IL10, IL11, IL2RB, IL2RG, IL7R, INHBA, IRF1, IRF8, JAK2, JAK3, KIT, Klra4 (includes others), LAT, LAT2, LAX1, LCP2, LMO2, MLLT11, MYL9, NAB1, PDCD1, PIM1, PTPRC, RASGRP1, RASGRP4, RPL22, RPS19, SATB1, SIT1, SPI1, SPIB, STAT1, SY…	65		Hematological System Development and Function	recruitment	recruitment of myeloid cells	3.43e-20	ADAM17, AGT, AHR, ANXA1, AOC3, APOE, BTLA, C3, C5AR1, CARD9, CASP1, CCL19, Ccl2, CCL2, CCL22, CCL3L3, CCL4, CCL5, Ccl7, CCR6, CD14, CD28, CD44, CD69, CD8A, CLEC4E, CNR2, CSF1R, CTSC, CX3CR1, CXCL10, CXCL2, CXCL3, CYP1A1, F2RL1, FASLG, FCGR2A, FCGR2B, FCGR3A/FCGR3B, FUT7, GLRX, GRK6, GSN, ICAM1, IL17RA, IL18, IL1A, IL1B, IL1R1, IL1RL1, IL1RN, IL21R, IL6, IRF3, IRF6, IRF7, ITGAM, ITGB2, LCN2, LEP, …	96		Hematological System Development and Function	infiltration	infiltration by mononuclear leukocytes	3.13e-16	AGT, APOE, BCL11B, C3, C6, CBFB, CCL19, CCL2, Ccl2, CCL21, CCL22, CCL3L3, CCL4, CCR7, CD44, CD80, CD86, COL4A3, CXCL10, CXCL16, ESR2, F2RL1, GJB2, HCK, HLA-A, HMOX1, ICOS, IL10, IL12B, IL17RA, IL18, IL18BP, IL1B, IRF6, ITGA4, ITK, JAK3, KCNK2, LAG3, LTB, MMP12, MMP9, NLRP3, OLFM4, OSM, PDCD1, PF4, PIK3CD, PRF1, PRKCQ, PTGES, REN, SELE, SELP, SELPLG, SOCS1, STAT1, TCIRG1, TGFBR1, TNF, TNFAIP8L2, T…	65
Cell Death and Survival	cytotoxicity	cytotoxicity of lymphocytes	4.17e-14	ADIPOQ, ARRB2, CCL2, CCR3, CD1D, CD2, CD226, CD244, CD247, CD27, CD300A, CD38, CD44, CD5, CD6, CD96, CEACAM1, CLEC12B, DOCK8, FADD, FAS, FCGR1A, FCGR2A, FCGR3A/FCGR3B, FERMT3, FOXP3, GZMB, HAVCR2, HLA-A, HLA-E, HLA-G, HPRT1, ICAM1, ICOS, IFNAR1, IFNGR2, IL10, IL18, IL21R, IL6, ITGAL, ITGB2, KLRB1, KLRD1, Klrk1, LAT, LCK, MYBL2, MYD88, NCR1, NCR3, NFATC2, NOS2, PAK1, PLCG2, PNP, PRF1, PRKCQ, PTK2B…	80		Cellular Growth and Proliferation	formation	formation of mononuclear leukocytes	2.19e-13	B2M, BAX, BCL11B, BCL2L11, BIRC5, BRCA1, CBFB, CCND1, CCR9, CD3D, CD3E, CD3G, CD83, CDKN1A, CDKN1B, CDKN2A, CXCR4, DCK, DLL1, DOCK8, EEF1D, EGR2, F5, GATA3, GRAP2, IL10, IL21R, IL2RB, IL2RG, IL6, IL7R, INHBA, IRF1, JAK3, KIT, Klra4 (includes others), LAT, LAT2, LAX1, LCP2, LMO2, LTB, LYN, MLLT11, NAB1, NFIL3, PDCD1, PIK3CD, PIM1, PTPRC, RASGRP1, RASGRP4, RPL22, SATB1, SIT1, SPI1, SPIB, SYK, TGFB1…	67		Hematological System Development and Function	recruitment	recruitment of neutrophils	7.81e-19	ADAM17, AGT, AHR, ANXA1, APOE, C5AR1, CASP1, CCL19, Ccl2, CCL2, CCL22, CCL3L3, CCL4, CCL5, Ccl7, CD14, CD28, CD44, CD69, CD8A, CLEC4E, CTSC, CX3CR1, CXCL10, CXCL2, CXCL3, CYP1A1, F2RL1, FASLG, FCGR2A, FCGR2B, FCGR3A/FCGR3B, FUT7, GLRX, GRK6, GSN, ICAM1, IL17RA, IL18, IL1A, IL1B, IL1R1, IL1RN, IL6, IRF3, IRF6, ITGAM, ITGB2, LCN2, LEP, LGALS3, LIF, LSP1, LY96, LYZ, MDK, MIF, MMP2, MMP28, MMP9, Muc1…	81		Hematological System Development and Function	homing	homing of leukocytes	2.07e-36	ACKR2, ADAM17, ADORA1, AIF1, ANGPT1, ANXA1, APOE, B4GALT1, BATF, C3, C5AR1, C5AR2, CAMK1D, CAPG, CCL17, CCL19, CCL2, Ccl2, CCL21, CCL22, CCL3L3, CCL4, CCL5, CCR6, CCR7, CCR9, CD28, CD4, CD44, CD69, CD74, CKLF, CNR2, CORO1A, CSF1R, CSF2RA, CSF3R, CTSE, CX3CR1, CXADR, CXCL10, CXCL11, CXCL13, CXCL16, Cxcl3, Cxcl9, CXCR1, CXCR3, CXCR4, CYBB, CYSLTR1, EDN1, EDNRA, EDNRB, ELN, F2RL1, FCER1G, FCGR2A, FG…	151
Cell Death and Survival	cytotoxicity	cytotoxicity of natural killer cells	1.16e-12	ADIPOQ, ARRB2, CCL2, CD2, CD226, CD244, CD247, CD27, CD300A, CD38, CD44, CD6, CD96, CEACAM1, CLEC12B, DOCK8, FAS, FCGR1A, FCGR2A, FCGR3A/FCGR3B, FERMT3, HAVCR2, ICOS, IFNAR1, IL10, IL18, ITGAL, ITGB2, KLRB1, KLRD1, Klrk1, LAT, LCK, MYBL2, MYD88, NCR1, NCR3, NOS2, PAK1, PLCG2, PRF1, PRKCQ, PTK2B, PTPN6, SLAMF6, SPN, STAT1, STAT4, SYK, TBX21, TGFB1, TLR9, TNFSF10, TYROBP, VAV1, WAS	56		Cellular Growth and Proliferation	formation	formation of thymocytes	5.66e-13	B2M, BAX, BCL11B, BCL2L11, BIRC5, BRCA1, CBFB, CCND1, CCR9, CD3D, CD3E, CD3G, CD83, CDKN1A, CDKN1B, CDKN2A, CXCR4, DCK, DLL1, EEF1D, EGR2, F5, GATA3, GRAP2, IL10, IL2RB, IL2RG, IL7R, IRF1, JAK3, KIT, Klra4 (includes others), LAT, LAT2, LAX1, LCP2, LMO2, MLLT11, NAB1, PDCD1, PIM1, PTPRC, RASGRP1, RASGRP4, RPL22, SATB1, SIT1, SPI1, SPIB, SYK, THEMIS2, TK1, TRAT1, TYROBP, WT1, ZAP70	56		Hematological System Development and Function	recruitment	recruitment of granulocytes	1.6e-18	ADAM17, AGT, AHR, ANXA1, APOE, BTLA, C3, C5AR1, CARD9, CASP1, CCL19, Ccl2, CCL2, CCL22, CCL3L3, CCL4, CCL5, Ccl7, CCR6, CD14, CD28, CD44, CD69, CD8A, CLEC4E, CTSC, CX3CR1, CXCL10, CXCL2, CXCL3, CYP1A1, F2RL1, FASLG, FCGR2A, FCGR2B, FCGR3A/FCGR3B, FUT7, GLRX, GRK6, GSN, ICAM1, IL17RA, IL18, IL1A, IL1B, IL1R1, IL1RL1, IL1RN, IL21R, IL6, IRF3, IRF6, ITGAM, ITGB2, LCN2, LEP, LGALS3, LIF, LSP1, LY96, …	90		Hematological System Development and Function	homing	homing of neutrophils	6.63e-26	ADORA1, C3, C5AR1, C5AR2, CAMK1D, CAPG, CCL19, Ccl2, CCL2, CCL21, CCL3L3, CCL4, CCL5, CCR6, CCR7, CD28, CD69, CD74, CKLF, CORO1A, CSF2RA, CSF3R, CXADR, CXCL10, Cxcl3, CXCR1, EDN1, EDNRA, FCER1G, FCGR2A, FGR, GRK6, GRN, GSN, HCK, ICAM1, IL18, IL1B, IL1R1, INPP5D, ITGA4, ITGAM, ITGB2, LCN2, LGALS3, LSP1, LYN, MYO1F, NCKAP1L, NOD2, PDE4B, PF4, PIK3CD, PIK3R5, PRKCA, PTPN6, RAC2, RASGRP4, S100A8, S10…	77
Cell Death and Survival	cytolysis	cytolysis	2.46e-16	ABCB1, AMPD3, ANXA1, APP, AQP9, ARRB2, BATF3, BAX, BPI, C3, C4A/C4B, CAMP, CASP1, CD1D, CD226, CD244, CD247, Cd24a, CD3G, CD44, CD7, CD8A, CEACAM1, CFB, CFH, CFI, CLDN4, CX3CR1, EIF4E, FAS, FCAR, FCER1G, FCGR1A, FCGR2A, FCGR2B, FCGR3A/FCGR3B, FOXO3, FUT4, G6PD, GCLC, GJA1, GPX1, GSR, GZMB, GZMM, HBB, HCST, HLA-A, HLA-G, HMOX1, HPRT1, IBSP, IFNAR1, IL11, IL18, IL1B, IL21R, IL2RB, IL2RG, IL6, IL7R,…	131		Cellular Growth and Proliferation	formation	formation of lymphocytes	7.96e-13	B2M, BAX, BCL11B, BCL2L11, BIRC5, BRCA1, CBFB, CCND1, CCR9, CD3D, CD3E, CD3G, CD83, CDKN1A, CDKN1B, CDKN2A, CXCR4, DCK, DLL1, DOCK8, EEF1D, EGR2, F5, GATA3, GRAP2, IL10, IL21R, IL2RB, IL2RG, IL6, IL7R, IRF1, JAK3, KIT, Klra4 (includes others), LAT, LAT2, LAX1, LCP2, LMO2, LTB, LYN, MLLT11, NAB1, NFIL3, PDCD1, PIK3CD, PIM1, PTPRC, RASGRP1, RASGRP4, RPL22, SATB1, SIT1, SPI1, SPIB, SYK, TGFB1, THEMI…	64		Hematological System Development and Function	recruitment	recruitment of phagocytes	2.68e-18	ADAM17, ADIPOQ, AGT, AHR, ANXA1, APOE, C5AR1, CASP1, CCL19, Ccl2, CCL2, CCL22, CCL3L3, CCL4, CCL5, Ccl7, CD14, CD28, CD4, CD40, CD44, CD5L, CD69, CD8A, CLEC4E, CRYAB, CSF1R, CTSC, CX3CR1, CXCL10, CXCL2, CXCL3, CYP1A1, F13A1, F2RL1, FASLG, FCGR2A, FCGR2B, FCGR3A/FCGR3B, FUT7, FUT8, GLRX, GRK6, GSN, ICAM1, IL17RA, IL18, IL1A, IL1B, IL1R1, IL1RN, IL6, INPP5D, IRF3, IRF5, IRF6, ITGAM, ITGB2, LCN2, LE…	99		Hematological System Development and Function	homing	homing of granulocytes	1.03e-23	ADORA1, ANXA1, C3, C5AR1, C5AR2, CAMK1D, CAPG, CCL19, CCL2, Ccl2, CCL21, CCL3L3, CCL4, CCL5, CCR6, CCR7, CD28, CD69, CD74, CKLF, CORO1A, CSF2RA, CSF3R, CXADR, CXCL10, Cxcl3, Cxcl9, CXCR1, CXCR3, EDN1, EDNRA, FCER1G, FCGR2A, FGR, GRK6, GRN, GSN, HCK, ICAM1, IL10, IL18, IL1B, IL1R1, INPP5D, ITGA4, ITGAM, ITGB2, LCN2, LGALS3, LSP1, LYN, MYO1F, NCKAP1L, NOD2, PDE4B, PF4, PIK3CD, PIK3R5, PLAUR, PRKCA,…	82
Cell Death and Survival	cytolysis	cytolysis of leukocytes	7.27e-13	BATF3, CD1D, CD226, CD244, CD247, CD3G, CD44, CD7, CD8A, FCER1G, FCGR2A, FUT4, HCST, HLA-A, HLA-G, IFNAR1, IL18, IL21R, IL2RG, IL6, ITGAL, ITGB2, Klrk1, LCK, LCP2, MSH2, NCR1, NCR3, NFIL3, PIK3CD, PLCG2, PNP, PRDX1, PRF1, PSME2, PTPRC, RAG1, SERPINB9, STAT1, STMN1, TAP1, TAPBP, TBK1, TBX21, TLR9, TNF, TNFSF10, TNFSF14, TOX, TYROBP, VAV1, XCL1	52		Cellular Growth and Proliferation	growth	growth of neurites	6.87e-13	A2M, AATK, ADAM17, ADCY6, ANGPT1, APEX1, APOE, AR, ARF6, ARG1, ARTN, BAG1, BAIAP2, BAX, BCAN, BDNF, BMP4, BMP6, CAMK1, CAMK4, CAV1, Ccl2, CD9, CDK1, CDK2, CDK5, CDK5R1, CDKN1A, CNR1, CNTF, CNTN2, CORO1B, DDR1, DISC1, DOK4, DOK5, DOK6, DPYSL3, DPYSL5, E2F1, EFNB3, ELMO2, ENPP2, ERBB4, ESR1, ESR2, EZR, FAM107A, FEZ1, FGF1, FGF4, FGF5, FGF7, FGFR3, FGFR4, FKBP5, FN1, GAL, GATA3, GDNF, GFAP, GJA1, GJ…	194		Hematological System Development and Function	recruitment	recruitment of lymphocytes	1.33e-16	AGT, AOC3, CCL17, CCL19, Ccl2, CCL2, CCL21, CCL22, CCL4, CCL5, Ccl6, CCR4, CCR6, CCR7, CD4, CD40, CD44, CD8A, CLEC4E, CX3CR1, CXCL10, CXCL11, CXCL16, CXCL3, CXCR3, CXCR4, FN1, FOS, HDC, ICAM1, IL16, IL18, IL1B, IL1R1, IL6, ITGAE, LEP, OSM, PRKCQ, PYCARD, SELE, SELL, SELP, SELPLG, SGPL1, TLR2, TLR9, TNF, TNFRSF8	49		Hematological System Development and Function	homing	homing of mononuclear leukocytes	4.92e-18	ACKR2, ADAM17, AIF1, ANGPT1, ANXA1, BATF, CCL17, CCL19, CCL2, Ccl2, CCL21, CCL22, CCL4, CCL5, CCR6, CCR7, CCR9, CD44, CKLF, CNR2, CXCL10, CXCL11, CXCL13, CXCL16, Cxcl9, CXCR1, CXCR3, CXCR4, CYSLTR1, ELN, FUT7, FYB, GNAO1, HLA-G, HP, IL10, IL12B, IL1B, INHBA, ITGA4, ITGAL, ITGB7, ITK, JAK2, JAK3, LAT, LCP1, LGALS3, MMP9, MST1, PF4, PIK3CD, PLA2G6, PLA2G7, PLAUR, PTPRO, RAC2, RGS1, RUNX1, S100B, SE…	76
Cell Death and Survival	cytolysis	cytolysis of blood cells	1.15e-12	AMPD3, APP, AQP9, BATF3, BAX, CAMP, CD1D, CD226, CD244, CD247, Cd24a, CD3G, CD44, CD7, CD8A, CFH, FCER1G, FCGR2A, FUT4, HBB, HCST, HLA-A, HLA-G, IFNAR1, IL18, IL21R, IL2RG, IL6, ITGAL, ITGB2, KCNN4, Klrk1, LCAT, LCK, LCP2, MSH2, NCR1, NCR3, NFIL3, PFKM, PIGA, PIK3CD, PLCG2, PNP, PRDX1, PRF1, PSME2, PTPRC, RAG1, SERPINB9, STAT1, STMN1, SUSD4, TAP1, TAPBP, TBK1, TBX21, TLR9, TNF, TNFSF10, TNFSF14, …	65		Hematological System Development and Function	quantity	quantity of leukocytes	2.69e-73	ABCA1, ABCB1, Abcb1b, ABCG2, ACKR3, ADA, ADAM17, ADGRE5, ADGRF5, ADIPOQ, AGR2, AGT, AHR, ALOX15, ALPL, ANPEP, APOE, ARID3A, ARNTL, ATF3, ATM, B2M, B3GNT5, B4GALT1, BANK1, BATF, BATF3, BAX, BCL11A, BCL11B, BCL2A1, BCL2L11, BCL3, BDNF, BID, BIRC2, BIRC3, BIRC5, BLNK, BMF, BRCA2, BST1, BTK, BUB1, C1QA, C3, C4A/C4B, C5AR1, C5AR2, C6, CAMK4, CASP3, CASP8, CBFB, CBS/CBSL, CCL19, CCL2, Ccl2, CCL21, CCL2…	516		Hematological System Development and Function	recruitment	recruitment of mononuclear leukocytes	2.13e-16	AGT, AOC3, APOE, CASP1, CCL17, CCL19, Ccl2, CCL2, CCL21, CCL22, CCL4, CCL5, Ccl6, CCR4, CCR6, CCR7, CD4, CD40, CD44, CD8A, CLEC4E, CX3CR1, CXCL10, CXCL11, CXCL16, CXCL3, Cxcl9, CXCR3, CXCR4, FCGR2B, FN1, FOS, HDC, ICAM1, IL16, IL18, IL1B, IL1R1, IL6, ITGA4, ITGAE, LEP, NLRP3, NOD2, OSM, PRKCQ, PYCARD, SELE, SELL, SELP, SELPLG, SGPL1, TLR2, TLR9, TNF, TNFRSF1B, TNFRSF8	57		Hematological System Development and Function	migration	migration of mononuclear leukocytes	1.83e-35	ABCA1, Abcb1b, ACKR2, ADAM17, AGT, ANXA1, BACH2, BATF, BCL11B, BTK, C3, C6, CCL17, CCL19, Ccl2, CCL2, CCL21, CCL22, CCL3L3, CCL4, CCL5, Ccl6, CCR6, CCR7, CCR9, CD1D, CD2, CD226, CD247, CD274, CD28, CD3E, CD4, CD40, CD44, CD69, CD80, CD86, CD8A, COL4A3, CTSS, CTSV, CX3CR1, CXCL10, CXCL11, CXCL13, CXCL16, Cxcl9, CXCR3, CXCR4, CYSLTR1, CYTIP, DOCK8, EGR2, ESR2, F2RL1, FAM65B, FERMT3, FOS, FUT7, FYB,…	147
Cell Death and Survival	cytolysis	cytolysis of lymphocytes	4.94e-12	BATF3, CD1D, CD226, CD244, CD247, CD3G, CD44, CD7, CD8A, FCER1G, FCGR2A, FUT4, HCST, HLA-A, HLA-G, IFNAR1, IL18, IL21R, IL2RG, IL6, ITGAL, Klrk1, LCK, LCP2, MSH2, NCR1, NFIL3, PIK3CD, PLCG2, PNP, PRDX1, PRF1, PSME2, PTPRC, RAG1, SERPINB9, STAT1, STMN1, TAP1, TAPBP, TBK1, TBX21, TLR9, TNF, TNFSF10, TNFSF14, TOX, TYROBP, VAV1, XCL1	50		Hematological System Development and Function	quantity	quantity of blood cells	1.6e-71	ABCA1, ABCB1, Abcb1b, ABCG2, ACKR3, ADA, ADAM17, ADD2, ADGRE5, ADGRF5, ADIPOQ, AGR2, AGT, AHR, ALOX15, ALPL, ANPEP, ANXA7, APOE, AQP1, ARID3A, ARNTL, ATF3, ATG7, ATM, B2M, B3GNT5, B4GALT1, BANK1, BATF, BATF3, BAX, BCL11A, BCL11B, BCL2A1, BCL2L11, BCL3, BDNF, BID, BIRC2, BIRC3, BIRC5, BLNK, BMF, BMP4, BRCA2, BST1, BTK, BUB1, C1QA, C3, C4A/C4B, C5AR1, C5AR2, C6, CAMK4, CASP3, CASP8, CBFB, CBS/CBSL,…	563		Hematological System Development and Function	recruitment	recruitment of T lymphocytes	1.68e-13	AGT, CCL17, CCL19, Ccl2, CCL2, CCL21, CCL22, CCL4, CCL5, CCR4, CCR6, CCR7, CD4, CD40, CD44, CD8A, CXCL10, CXCL11, CXCL16, CXCL3, CXCR3, CXCR4, FOS, HDC, ICAM1, IL16, ITGAE, LEP, OSM, PYCARD, SELE, SELP, SELPLG, SGPL1, TLR9, TNF, TNFRSF8	37		Hematological System Development and Function	migration	Lymphocyte migration	1.3e-33	Abcb1b, ACKR2, ADAM17, AGT, ANXA1, BACH2, BATF, BCL11B, BTK, C3, C6, CCL17, CCL19, Ccl2, CCL2, CCL21, CCL22, CCL3L3, CCL4, CCL5, Ccl6, CCR6, CCR7, CCR9, CD1D, CD2, CD226, CD247, CD274, CD28, CD3E, CD4, CD40, CD44, CD69, CD80, CD86, CD8A, COL4A3, CTSS, CTSV, CX3CR1, CXCL10, CXCL11, CXCL13, CXCL16, Cxcl9, CXCR3, CXCR4, CYSLTR1, CYTIP, DOCK8, EGR2, ESR2, F2RL1, FAM65B, FERMT3, FOS, FUT7, FYB, GRK6, …	137
Cell Death and Survival	toxicity	toxicity of cells	2.87e-16	ABCC5, ADIPOQ, APP, AR, ARRB2, CASP1, CCL2, CCR3, CD1D, CD2, CD226, CD244, CD247, CD27, CD300A, CD38, CD44, CD5, CD6, CD96, CEACAM1, CLEC12B, CORO1A, CTSB, CYBB, DHFR, DOCK8, FADD, FAS, FCER1G, FCGR1A, FCGR2A, FCGR3A/FCGR3B, FERMT3, FGR, FOS, FOXP3, GABRD, GDNF, GZMB, HAVCR2, HCK, HCST, HLA-A, HLA-E, HLA-G, HPRT1, ICAM1, ICOS, IFNAR1, IFNGR2, IKBKG, IL10, IL12RB2, IL18, IL1R1, IL1RN, IL21R, IL6, …	112		Hematological System Development and Function	quantity	quantity of mononuclear leukocytes	1.04e-56	ABCB1, Abcb1b, ABCG2, ACKR3, ADA, ADIPOQ, AGT, AHR, ANPEP, APOE, ARID3A, ARNTL, ATM, B2M, B3GNT5, B4GALT1, BANK1, BATF, BATF3, BAX, BCL11A, BCL11B, BCL2A1, BCL2L11, BCL3, BID, BIRC2, BIRC5, BLNK, BMF, BST1, BTK, C3, C5AR1, CAMK4, CASP3, CASP8, CBFB, CBS/CBSL, CCL19, CCL2, Ccl2, CCL21, CCL4, CCL5, Ccl7, CCNB2, CCR3, CCR6, CCR7, CCR9, CD180, CD1D, CD22, CD244, CD247, Cd24a, CD27, CD28, CD38, CD3D, …	406		Hematological System Development and Function	chemotaxis	chemotaxis of leukocytes	4.53e-27	ACKR2, ADAM17, ADORA1, AIF1, ANGPT1, ANXA1, APOE, C3, C5AR1, C5AR2, CAPG, CCL17, CCL19, Ccl2, CCL2, CCL21, CCL22, CCL3L3, CCL4, CCL5, CCND1, CCR4, CCR6, CCR7, CD28, CD4, CD69, CD9, CDKN1A, CKLF, CORO1A, CSF1R, CSF2RA, CSF3R, CST3, CTSE, CX3CR1, CXADR, CXCL10, CXCL11, CXCL14, CXCL16, CXCL2, CXCL3, Cxcl3, CXCL6, Cxcl9, CXCR1, CXCR3, CXCR4, CYBB, CYSLTR1, EDNRA, EDNRB, ELN, F2R, F2RL1, FASLG, FCER1G…	152		Hematological System Development and Function	migration	T cell migration	2.81e-29	Abcb1b, ACKR2, ADAM17, AGT, BACH2, BATF, BCL11B, C3, C6, CCL17, CCL19, Ccl2, CCL2, CCL21, CCL22, CCL3L3, CCL4, CCL5, CCR6, CCR7, CCR9, CD274, CD28, CD4, CD40, CD44, CD69, CD80, CD86, COL4A3, CTSS, CTSV, CXCL10, CXCL11, CXCL13, CXCL16, Cxcl9, CXCR3, CXCR4, CYSLTR1, DOCK8, EGR2, ESR2, F2RL1, FAM65B, FUT7, FYB, GRK6, HGF, HLA-A, ICAM1, ICOS, IL10, IL12B, IL17RA, IL18BP, IL1B, INPP5D, ITGA4, ITGAL, I…	105
Cellular Movement	cell movement	cell movement of blood cells	4.48e-59	ABCA1, Abcb1b, ABCB4, ACKR2, ACKR3, ACTB, ADA, ADAM17, ADIPOQ, ADORA1, ADRB3, ADRBK1, AGT, AHR, AIF1, AIMP1, ALCAM, ALOX5AP, ANXA1, ANXA2, AOC3, APOE, APP, AQP1, AQP9, AR, ARG1, ARRB2, ATG16L1, B4GALT1, BATF, BGN, BID, BMP2, BMP4, BTK, C1QBP, C2, C3, C4A/C4B, C5AR1, C5AR2, CAMK1D, CAMP, CAPG, CARD9, CASP1, CASR, CBFB, Ccl2, CCL2, CCL20, CCL21, CCL22, CCL24, CCL3L3, CCL4, Ccl6, Ccl7, Ccl9, CCND1, …	478		Hematological System Development and Function	quantity	quantity of lymphocytes	3.39e-56	ABCB1, Abcb1b, ABCG2, ACKR3, ADA, ADIPOQ, AGT, AHR, ANPEP, APOE, ARID3A, ARNTL, ATM, B2M, B3GNT5, B4GALT1, BANK1, BATF, BATF3, BAX, BCL11A, BCL11B, BCL2A1, BCL2L11, BCL3, BID, BIRC2, BIRC5, BLNK, BMF, BST1, BTK, C3, C5AR1, CAMK4, CASP3, CASP8, CBFB, CCL19, Ccl2, CCL2, CCL21, CCL4, CCL5, CCNB2, CCR6, CCR7, CCR9, CD180, CD1D, CD22, CD244, CD247, Cd24a, CD27, CD28, CD38, CD3D, CD3E, CD3G, CD4, CD40,…	393		Hematological System Development and Function	chemotaxis	chemotaxis of myeloid cells	1.02e-24	ADORA1, AIF1, ANGPT1, ANXA1, APOE, C3, C5AR1, C5AR2, CAPG, CCL17, CCL19, Ccl2, CCL2, CCL21, CCL22, CCL3L3, CCL4, CCL5, CCND1, CCR6, CCR7, CD28, CD4, CD69, CD9, CDKN1A, CKLF, CORO1A, CSF1R, CSF2RA, CSF3R, CST3, CTSE, CX3CR1, CXADR, CXCL10, CXCL14, CXCL2, CXCL3, Cxcl3, CXCL6, Cxcl9, CXCR1, CXCR3, CXCR4, CYBB, EDNRA, EDNRB, ELN, F2R, FASLG, FCER1G, FCGR2A, FGR, GRK6, GRN, GSN, HCK, HP, ICAM1, IL16, …	128		Hematological System Development and Function	migration	migration of phagocytes	9.35e-25	ABCA1, ADAM17, ADIPOQ, AGT, ALB, ALCAM, ANGPT1, ANXA1, APOE, C3, CCL17, CCL19, CCL2, Ccl2, CCL21, CCL22, CCL3L3, CCL4, CCL5, Ccl9, CCR7, CD40, CD44, CD74, CD80, CD86, CDH1, CEBPE, CLEC4M, CSF1R, CTSS, CTSV, CTSZ, CX3CR1, CXCL10, CXCL11, CXCL13, CXCR3, CXCR4, CYBB, DOCK8, F10, FGR, GREM1, HCK, HCLS1, HGF, ICAM1, ICOS, IL10, IL10RA, IL12B, IL17RA, IL18, IL1B, IL1RN, IL21R, INPP5D, IRF6, ITGA4, ITGA…	104
Cellular Movement	cell movement	cell movement of leukocytes	4.45e-53	ABCA1, Abcb1b, ABCB4, ACKR2, ACKR3, ACTB, ADA, ADAM17, ADIPOQ, ADORA1, ADRB3, ADRBK1, AGT, AIF1, ALCAM, ALOX5AP, ANXA1, ANXA2, AOC3, APOE, APP, AQP9, AR, ARG1, ARRB2, B4GALT1, BATF, BGN, BID, BTK, C1QBP, C2, C3, C4A/C4B, C5AR1, C5AR2, CAMK1D, CAMP, CAPG, CASP1, CASR, CBFB, Ccl2, CCL2, CCL20, CCL21, CCL22, CCL24, CCL3L3, CCL4, Ccl6, Ccl9, CCND1, CCR3, CCR4, CCR6, CCR7, CCR9, CD14, CD1D, CD2, CD209…	417		Hematological System Development and Function	quantity	quantity of T lymphocytes	1.03e-41	ABCB1, Abcb1b, ABCG2, ADA, ADIPOQ, AGT, AHR, ANPEP, APOE, ATM, B2M, BATF, BATF3, BAX, BCL11A, BCL11B, BCL2A1, BCL2L11, BIRC5, BMF, C5AR1, CAMK4, CASP3, CASP8, CBFB, CCL19, Ccl2, CCL21, CCL4, CCL5, CCNB2, CCR6, CCR7, CCR9, CD1D, CD244, CD247, CD27, CD28, CD3D, CD3E, CD3G, CD4, CD40, CD44, CD5, CD5L, CD69, CD7, CD80, CD83, CD84, CD86, CD8A, CD8B, CDKN1A, CDKN1B, CDKN2A, CDKN2C, CHRNA1, CHST3, CIITA…	293		Hematological System Development and Function	chemotaxis	chemotaxis of phagocytes	8.86e-24	ADORA1, AIF1, ANGPT1, ANXA1, APOE, C3, C5AR1, C5AR2, CAPG, CCL17, CCL19, Ccl2, CCL2, CCL21, CCL22, CCL3L3, CCL4, CCL5, CCND1, CCR6, CCR7, CD28, CD4, CD69, CD9, CDKN1A, CKLF, CORO1A, CSF1R, CSF2RA, CSF3R, CST3, CTSE, CX3CR1, CXADR, CXCL10, CXCL14, CXCL2, CXCL3, Cxcl3, CXCL6, CXCR1, CXCR3, CXCR4, CYBB, EDNRA, EDNRB, ELN, F2R, FASLG, FCER1G, FCGR2A, FGR, GRK6, GRN, GSN, HCK, HP, HRH1, ICAM1, IL16, I…	127		Hematological System Development and Function	migration	migration of antigen presenting cells	7.94e-19	ADIPOQ, AGT, ALCAM, APOE, C3, CCL17, CCL19, Ccl2, CCL2, CCL21, CCL22, CCL3L3, CCL4, CCL5, Ccl9, CCR7, CD40, CD44, CD74, CD80, CD86, CDH1, CLEC4M, CSF1R, CTSZ, CXCL10, CXCL11, CXCL13, CXCR3, CXCR4, CYBB, DOCK8, HCLS1, HGF, ICAM1, ICOS, IL10, IL10RA, IL12B, IL18, IL1B, IL1RN, IL21R, IRF6, ITGAL, LGALS3, MMP12, MST1, NLRP10, NOS2, P2RY6, PTK2B, PTPN6, RAC2, S1PR4, SDC1, SELE, SEMA4A, SEMA4D, SIRPA, …	67
Cellular Movement	cell movement	cell movement	4.79e-46	A2M, ABCA1, Abcb1b, ABCB4, ABCC4, ABI3, ACKR2, ACKR3, ACSL4, ACTB, ACTR2, ACTR3, ADA, ADAM17, ADAM19, Adam1a, ADAMTS1, ADARB1, ADGRB1, ADIPOQ, ADORA1, ADRB3, ADRBK1, AGT, AHCY, AHR, AIF1, AIMP1, AJAP1, ALCAM, ALOX5AP, ANGPTL3, ANGPTL4, ANPEP, ANXA1, ANXA2, AOC3, APAF1, APLN, APOE, APP, AQP1, AQP4, AQP9, AR, AREG, ARF6, ARG1, ARHGAP22, ARHGAP31, ARHGAP4, ARHGAP8/PRR5-ARHGAP8, ARHGDIA, ARHGDIB, ARH…	895		Hematological System Development and Function	quantity	quantity of phagocytes	1.75e-35	ABCA1, ADA, ADAM17, ADGRF5, ADIPOQ, AGR2, AGT, AHR, APOE, ARNTL, ATF3, B2M, B4GALT1, BATF3, BCL11A, BCL2A1, BCL2L11, BCL3, BID, BIRC3, C1QA, C3, C4A/C4B, C5AR1, C5AR2, C6, CBS/CBSL, CCL19, Ccl2, CCL2, CCL21, CCL22, CCL3L3, Ccl7, Ccl9, CCR3, CCR6, CCR7, CD1D, CD200R1, CD300A, CD40, CD83, CDKN1A, CDKN2B, CEBPA, CERK, CES1, CFH, CIITA, CLEC11A, CLEC4D, CLEC4E, CLEC7A, CMKLR1, CNR2, CR2, CSF1R, CSF3R…	227		Hematological System Development and Function	chemotaxis	chemotaxis of neutrophils	1.7e-18	ADORA1, C3, C5AR1, C5AR2, CAPG, CCL19, Ccl2, CCL2, CCL21, CCL3L3, CCL4, CCL5, CCR6, CCR7, CD28, CD69, CKLF, CORO1A, CSF2RA, CSF3R, CST3, CXADR, CXCL10, CXCL14, CXCL2, CXCL3, Cxcl3, CXCL6, CXCR1, EDNRA, FASLG, FCER1G, FCGR2A, FGR, GRK6, GRN, GSN, HCK, ICAM1, IL18, IL1B, IL1R1, INPP5D, ITGA4, ITGAM, ITGB2, LCN2, LGALS3, LSP1, LYN, MDK, MYO1F, NCKAP1L, NOD2, PDE4B, PF4, PIK3CD, PIK3R5, PREX1, PRKCA,…	77		Hematological System Development and Function	migration	migration of dendritic cells	3.09e-15	AGT, ALCAM, APOE, C3, CCL17, CCL19, CCL2, CCL21, CCL22, CCL3L3, CCL4, CCL5, Ccl9, CCR7, CD40, CD44, CD74, CD80, CD86, CDH1, CLEC4M, CTSZ, CXCL10, CXCL11, CXCL13, CXCR3, CXCR4, DOCK8, HCLS1, ICAM1, ICOS, IL10, IL10RA, IL12B, IL18, IL1B, IL21R, NLRP10, PTK2B, PTPN6, RAC2, S1PR4, SELE, SIRPA, SPP1, TNF, WAS	47
Cellular Movement	cell movement	cell movement of phagocytes	4.45e-41	ABCA1, ADAM17, ADIPOQ, ADORA1, ADRB3, ADRBK1, AGT, AIF1, ALCAM, ALOX5AP, ANXA1, ANXA2, AOC3, APOE, APP, AQP9, AR, ARG1, B4GALT1, BID, BTK, C1QBP, C2, C3, C4A/C4B, C5AR1, C5AR2, CAMK1D, CAMP, CAPG, CASP1, CASR, CCL2, Ccl2, CCL20, CCL21, CCL22, CCL24, CCL3L3, CCL4, Ccl9, CCND1, CCR3, CCR6, CCR7, CD14, CD209, CD38, CD40, CD44, CD80, CD86, CD9, CDH1, CDKN1A, CEACAM1, CEBPE, CES1, CFB, CFH, CKLF, CLEC…	300		Hematological System Development and Function	quantity	quantity of myeloid cells	1.33e-31	ADA, ADAM17, ADGRE5, ADIPOQ, AHR, ALOX15, APOE, ARID3A, ARNTL, B4GALT1, BCL2L11, BDNF, BID, BRCA2, C1QA, C3, C4A/C4B, C5AR1, C5AR2, C6, CASP8, Ccl2, CCL2, CCL22, CCL3L3, CCR3, CCR6, CD101, CD1D, CD200R1, CD22, Cd24a, CD300A, CD40, CD8A, CDKN1A, CDKN1B, CEBPA, CEBPE, CERK, CFH, CISH, CLEC11A, CLEC4E, CLEC7A, CMKLR1, CNR2, CR2, CSF1R, CSF2RB, CSF3R, CTSE, CXCL6, CXCR4, CYBB, CYP1A1, DCK, DOK1, DOK2…	193		Hematological System Development and Function	chemotaxis	chemotaxis of granulocytes	2.75e-17	ADORA1, ANXA1, C3, C5AR1, C5AR2, CAPG, CCL19, Ccl2, CCL2, CCL21, CCL3L3, CCL4, CCL5, CCR6, CCR7, CD28, CD69, CKLF, CORO1A, CSF2RA, CSF3R, CST3, CXADR, CXCL10, CXCL14, CXCL2, CXCL3, Cxcl3, CXCL6, Cxcl9, CXCR1, CXCR3, EDNRA, FASLG, FCER1G, FCGR2A, FGR, GRK6, GRN, GSN, HCK, ICAM1, IL18, IL1B, IL1R1, INPP5D, ITGA4, ITGAM, ITGB2, LCN2, LGALS3, LSP1, LYN, MDK, MYO1F, NCKAP1L, NOD2, PDE4B, PF4, PIK3CD, …	84		Hematological System Development and Function	migration	NK cell migration	1.33e-13	Ccl2, CCL2, CCL21, CCL22, CCL3L3, CCL5, Ccl6, CCR7, CD1D, CD226, CD40, CD44, CX3CR1, CXCL10, CXCR3, FERMT3, HLA-G, PIK3CD, PRKCQ, S1PR5, SELE, SELL, SELP, TLR2, TNF, XCL1	26
Cellular Movement	cell movement	cell movement of myeloid cells	1.24e-39	ABCA1, ADAM17, ADIPOQ, ADORA1, ADRB3, ADRBK1, AGT, AIF1, ALOX5AP, ANXA1, ANXA2, AOC3, APOE, APP, AQP9, AR, ARG1, ARRB2, B4GALT1, BID, BTK, C1QBP, C2, C3, C4A/C4B, C5AR1, C5AR2, CAMK1D, CAMP, CAPG, CASP1, CASR, CBFB, CCL2, Ccl2, CCL20, CCL21, CCL22, CCL24, CCL3L3, CCL4, CCND1, CCR3, CCR6, CCR7, CD14, CD2, CD44, CD9, CDKN1A, CEACAM1, CEBPE, CES1, CFB, CFH, CKLF, CLEC11A, CMKLR1, CNP, CNR2, COL1A1, …	292		Hematological System Development and Function	quantity	quantity of hematopoietic progenitor cells	3.32e-28	ABCB1, Abcb1b, ADD2, AHR, ALOX15, APOE, ARID3A, ARNTL, ATG7, ATM, B2M, BAX, BCL11A, BCL11B, BCL2L11, BCL3, BIRC5, BLNK, BMF, BRCA2, BTK, CASP3, CASP8, CBFB, CCNB2, CCND1, CCR6, CCR7, CCR9, CD180, CD22, CD244, CD247, Cd24a, CD28, CD3E, CD3G, CD4, CD40, CD44, CD5, CD5L, CD69, CD7, CD72, CD80, CD86, CD8A, CD8B, CD9, CDH17, CDK4, CDKN1A, CDKN1B, CDKN2A, CEBPA, CIB1, CIITA, CLEC11A, CORO1A, CSF3R, CTL…	226		Hematological System Development and Function	adhesion	adhesion of immune cells	4.71e-27	A2M, ADAM17, ADIPOQ, ADORA1, AGT, ALCAM, ALOX12, ANGPT1, ANXA1, AOC3, APOE, BDKRB1, BTK, C1QA, C3, CACNA1C, CCL17, CCL19, Ccl2, CCL2, CCL21, CCL22, CCL3L3, CCL4, CCL5, CCND1, CCR7, CD14, CD2, CD200R1, CD28, CD300LD, CD4, CD40, CD44, CD6, CD69, CD83, CD9, CD97, CDH1, CLEC4M, Cmah, CNR1, CNR2, CORO1A, CSF3R, CTSZ, CX3CR1, CXCL10, CXCL11, CXCL2, CXCL3, CXCR1, CXCR3, CXCR4, EZR, F10, F2R, FAM65B, FAS…	151		Hematological System Development and Function	recruitment	recruitment of leukocytes	2.49e-34	ADAM17, ADIPOQ, AGT, AHR, ALOX15, ANXA1, APOB, APOE, B4GALT1, BTLA, C3, C4A/C4B, C5AR1, CAMK1, CARD9, CASP1, CCL17, CCL19, CCL2, Ccl2, CCL21, CCL22, CCL3L3, CCL4, CCL5, Ccl6, Ccl7, CCR6, CCR7, CD14, CD28, CD4, CD40, CD44, CD5L, CD69, CD74, CD8A, CLEC4E, CLEC7A, CNR2, CRYAB, CSF1R, CTSC, CX3CR1, CXCL10, CXCL11, CXCL16, Cxcl9, CXCR3, CXCR4, CYP1A1, EDN1, F2RL1, FCGR2A, FCGR2B, FCGR3A/FCGR3B, FOS, F…	131
Cellular Movement	cell movement	cell movement of granulocytes	2.75e-31	ADAM17, ADIPOQ, ADORA1, ADRB3, ADRBK1, AGT, ALOX5AP, ANXA1, AOC3, APOE, APP, AQP9, ARRB2, B4GALT1, BTK, C1QBP, C2, C3, C4A/C4B, C5AR1, C5AR2, CAMK1D, CAMP, CAPG, CASP1, CBFB, CCL2, Ccl2, CCL21, CCL24, CCL3L3, CCL4, CCR3, CCR6, CCR7, CD14, CD2, CD44, CEACAM1, CEBPE, CFB, CFH, CKLF, CLEC11A, CMKLR1, CORO1A, CSF2RA, CSF3R, CSK, CST3, CTSB, CXCL10, CXCL11, CXCL14, CXCL2, Cxcl3, CXCL3, CXCL6, CXCR2, C…	204		Hematological System Development and Function	quantity	quantity of B lymphocytes	2.33e-26	ACKR3, AHR, APOE, ARID3A, ARNTL, ATM, B3GNT5, BANK1, BAX, BCL2A1, BCL2L11, BCL3, BLNK, BMF, BST1, BTK, C3, CASP8, CCR6, CCR7, CCR9, CD180, CD22, Cd24a, CD27, CD28, CD38, CD40, CD69, CD72, CD80, CD84, CDH17, CDKN1A, CDKN2B, CDKN2C, CEBPE, Cmah, CNR2, CR2, CXCL13, CXCR4, CXCR5, DAPP1, DCK, DCLRE1C, DLK1, DLL1, DOCK8, ESR1, ESR2, FCER1G, FCGR1A, FCGR2A, FCGR2B, FCMR, FES, FLT3, FOS, GAPT, GJA1, GNA1…	177		Hematological System Development and Function	adhesion	adhesion of mononuclear leukocytes	5.5e-16	AGT, ANXA1, AOC3, BTK, CCL17, CCL19, CCL2, CCL21, CCL22, CCL4, CCL5, CCR7, CD2, CD28, CD44, CXCL11, CXCR1, CXCR3, EZR, FAM65B, FERMT3, FN1, FOXO1, FUT4, FUT7, FYB, GNRH1, HGF, ICAM1, ICOS, IL11, IL1A, IL1B, IL6, ITGA4, ITGAL, ITGAM, ITGB2, ITK, JAK2, JAK3, LCP1, LIF, LIPG, MAP4K1, MIF, OSM, PLAUR, PTPN6, RASGRP1, RASSF5, RGS1, SELE, SELL, SELP, SELPLG, SIPA1, SKAP1, SPN, TERT, THBS1, THBS2, TLR2,…	66		Hematological System Development and Function	recruitment	recruitment of myeloid cells	3.03e-25	ADAM17, AGT, AHR, ALOX15, ANXA1, APOE, B4GALT1, BTLA, C3, C5AR1, CAMK1, CARD9, CASP1, CCL19, CCL2, Ccl2, CCL22, CCL3L3, CCL4, CCL5, Ccl7, CCR6, CD14, CD28, CD44, CD69, CD8A, CLEC4E, CNR2, CSF1R, CTSC, CX3CR1, CXCL10, CYP1A1, EDN1, F2RL1, FCGR2A, FCGR2B, FCGR3A/FCGR3B, FUT7, GLRX, GRK6, GSN, ICAM1, IL10, IL17RA, IL18, IL1A, IL1B, IL1R1, IL1RN, IL21R, IRF6, IRF7, ITGAM, ITGB2, LCN2, LEP, LGALS3, LI…	90
Cellular Movement	cell movement	cell movement of mononuclear leukocytes	1.16e-30	ABCA1, Abcb1b, ACKR2, ACKR3, ACTB, ADAM17, AGT, AIF1, ANXA1, ANXA2, AOC3, APOE, APP, ARRB2, BATF, BGN, BTK, C3, CAMP, CASR, CBFB, CCL2, Ccl2, CCL20, CCL21, CCL22, CCL24, CCL3L3, CCL4, Ccl6, CCR3, CCR4, CCR6, CCR7, CCR9, CD1D, CD2, CD209, CD22, CD226, CD247, CD274, CD40, CD44, CD80, CD86, CD8A, CEACAM1, CHST4, CIITA, CKLF, CMKLR1, CNR2, COL1A1, COL4A3, CTSS, CTSV, CX3CR1, CXCL10, CXCL11, CXCL13, C…	240		Hematological System Development and Function	quantity	quantity of granulocytes	6.93e-26	ADA, ADAM17, ADGRE5, ADIPOQ, AHR, ALOX15, ARNTL, B4GALT1, BCL2L11, BID, C1QA, C3, C4A/C4B, C5AR1, C5AR2, C6, Ccl2, CCL2, CCL22, CCL3L3, CCR3, CCR6, CD101, CD1D, CD200R1, CD22, CD300A, CD40, CD8A, CDKN1A, CEBPA, CEBPE, CERK, CFH, CISH, CLEC11A, CLEC4E, CLEC7A, CMKLR1, CNR2, CR2, CSF1R, CSF2RB, CSF3R, CTSE, CXCL6, CYBB, CYP1A1, DOK1, DOK2, ESR2, F2RL1, FASLG, FCER1A, FCGR1A, FCGR2A, FCGR2B, FES, FU…	165		Hematological System Development and Function	adhesion	adhesion of phagocytes	3.08e-14	ADAM17, ADORA1, ALCAM, ALOX12, ANXA1, BTK, CCL2, CCL5, CCND1, CD44, CDH1, CNR1, CORO1A, CSF3R, CTSZ, CXCL2, CXCL3, CXCR1, F2R, FERMT3, FN1, FOXO1, GLRX, HCK, HPSE, ICAM1, ICOS, IL1A, IL1B, IL6, INPP5D, Irgm1, ITGA4, ITGAL, ITGAM, ITGB2, ITGB7, LCP1, LIPG, LYN, MIF, PAK1, PF4, PIK3CD, PLAUR, PLTP, PRKCQ, RAC2, S100A8, S100A9, SELE, SELL, SELP, SELPLG, SPI1, TERT, THY1, TLR2, TNF, VAV1, VAV3	61		Hematological System Development and Function	recruitment	recruitment of phagocytes	7.51e-25	ADAM17, ADIPOQ, AGT, AHR, ALOX15, ANXA1, APOB, APOE, B4GALT1, C5AR1, CAMK1, CASP1, CCL19, Ccl2, CCL2, CCL22, CCL3L3, CCL4, CCL5, Ccl7, CD14, CD28, CD4, CD40, CD44, CD5L, CD69, CD74, CD8A, CLEC4E, CRYAB, CSF1R, CTSC, CX3CR1, CXCL10, CYP1A1, EDN1, F2RL1, FCGR2A, FCGR2B, FCGR3A/FCGR3B, FUT7, GLRX, GRK6, GSN, ICAM1, IL10, IL17RA, IL18, IL1A, IL1B, IL1R1, IL1RN, INPP5D, IRF5, IRF6, ITGAM, ITGB2, LCN2,…	95
Cellular Movement	cell movement	cell movement of neutrophils	2.25e-29	ADAM17, ADIPOQ, ADORA1, ADRB3, ADRBK1, AGT, ALOX5AP, ANXA1, APOE, APP, AQP9, B4GALT1, BTK, C1QBP, C2, C3, C4A/C4B, C5AR1, C5AR2, CAMK1D, CAMP, CAPG, CASP1, Ccl2, CCL2, CCL21, CCL24, CCL3L3, CCL4, CCR6, CCR7, CD14, CD44, CEBPE, CFB, CFH, CKLF, CMKLR1, CORO1A, CSF2RA, CSF3R, CST3, CTSB, CXCL10, CXCL14, CXCL2, Cxcl3, CXCL3, CXCL6, CXCR2, CYBB, DDR2, F10, F2RL1, FABP4, FAS, FCER1G, FCGR2A, FGR, FPR1,…	168		Hematological System Development and Function	quantity	quantity of antigen presenting cells	8.9e-24	ABCA1, ADA, ADGRF5, ADIPOQ, AGT, APOE, B2M, BATF3, BCL11A, BCL2L11, BCL3, BDNF, BID, BIRC3, C4A/C4B, C5AR1, CCL19, CCL2, Ccl2, CCL21, CCL22, Ccl9, CCR6, CCR7, CD200R1, CD40, CD83, CDKN2B, CEBPA, CES1, CIITA, CLEC4D, CLEC4E, CSF1R, CTLA4, CTSS, CTSV, CX3CR1, CXCL10, CXCL13, CXCL14, CXCR6, DDR1, DOCK8, F2RL1, FCER1G, FCGR2B, FGF7, FLT3, GBA, GHR, GPR132, GPR68, GRAP2, GREM1, HAVCR2, HCK, HSD11B1, I…	142		Hematological System Development and Function	adhesion	adhesion of lymphocytes	6.5e-14	ANXA1, AOC3, BTK, CCL17, CCL19, CCL2, CCL21, CCL22, CCL4, CCR7, CD2, CD28, CD44, CXCL11, CXCR3, EZR, FAM65B, FERMT3, FN1, FUT4, FUT7, FYB, GNRH1, HGF, ICAM1, ICOS, IL11, IL1B, IL6, ITGA4, ITGAL, ITGB2, ITK, JAK2, JAK3, LIF, MAP4K1, OSM, PTPN6, RASGRP1, RASSF5, RGS1, SELE, SELL, SELP, SELPLG, SIPA1, SKAP1, SPN, THBS1, THBS2, TNF, ZAP70	53		Hematological System Development and Function	recruitment	recruitment of neutrophils	1.47e-24	ADAM17, AGT, AHR, ALOX15, ANXA1, APOE, B4GALT1, C5AR1, CAMK1, CASP1, CCL19, Ccl2, CCL2, CCL22, CCL3L3, CCL4, CCL5, Ccl7, CD14, CD28, CD44, CD69, CD8A, CLEC4E, CTSC, CX3CR1, CXCL10, CYP1A1, EDN1, F2RL1, FCGR2A, FCGR2B, FCGR3A/FCGR3B, FUT7, GLRX, GRK6, GSN, ICAM1, IL10, IL17RA, IL18, IL1A, IL1B, IL1R1, IL1RN, IRF6, ITGAM, ITGB2, LCN2, LEP, LGALS3, LIF, LSP1, LY96, LYZ, MMP2, MMP9, NCF4, NLRP3, NOD2…	78
Cellular Movement	cell movement	cell movement of antigen presenting cells	1.29e-25	ACKR2, ADAM17, ADIPOQ, ADORA1, AGT, ALCAM, ANXA1, APOE, APP, AR, ARG1, B4GALT1, BID, C3, C5AR1, CAMP, CASP1, Ccl2, CCL2, CCL20, CCL21, CCL22, CCL24, CCL3L3, CCL4, Ccl9, CCND1, CCR3, CCR6, CCR7, CD209, CD38, CD40, CD44, CD80, CD86, CDH1, CDKN1A, CEACAM1, CES1, CKLF, CLEC1B, CMKLR1, CNP, CNR2, COL4A3, CSF1R, CTSE, CTSZ, CX3CR1, CXCL10, CXCL11, CXCL13, CXCL14, CXCR2, CXCR3, CXCR4, CYBB, DOCK8, EDNRB…	182		Hematological System Development and Function	quantity	quantity of neutrophils	1.56e-20	ADA, ADAM17, ADIPOQ, AHR, ARNTL, B4GALT1, C1QA, C3, C4A/C4B, C5AR1, C5AR2, C6, Ccl2, CCL2, CCL3L3, CD1D, CD300A, CD40, CEBPA, CERK, CFH, CLEC4E, CLEC7A, CMKLR1, CNR2, CR2, CSF3R, CYBB, CYP1A1, DOK1, DOK2, ESR2, F2RL1, FASLG, FCGR1A, FCGR2A, FCGR2B, FES, FUT4, FUT7, GATA1, GJA1, GPR132, GSN, HDC, ICAM1, IFNAR1, IL10, IL12A, IL17RA, IL18, IL18BP, IL1A, IL1B, IL1R1, IL2RB, IL2RG, IL6, INPP5D, IRF6, …	119		Hematological System Development and Function	adhesion	adhesion of granulocytes	1.63e-12	ADAM17, ADORA1, ANXA1, C3, CD300LD, CD44, CD97, CORO1A, CSF3R, CXCL2, CXCL3, CXCR1, F10, FERMT3, FGR, FN1, GLRX, HCK, HPSE, ICAM1, ICOS, IL1B, IL6, INPP5D, ITGA4, ITGAL, ITGAM, ITGB2, LCP1, LGALS3, LYN, PF4, PIK3CD, PLAUR, PLTP, PRKCQ, S100A8, S100A9, SELE, SELL, SELP, SELPLG, THY1, TLR2, TNF, VAV1, VAV3	47		Hematological System Development and Function	recruitment	recruitment of granulocytes	1.16e-23	ADAM17, AGT, AHR, ALOX15, ANXA1, APOE, B4GALT1, BTLA, C3, C5AR1, CAMK1, CARD9, CASP1, CCL19, CCL2, Ccl2, CCL22, CCL3L3, CCL4, CCL5, Ccl7, CCR6, CD14, CD28, CD44, CD69, CD8A, CLEC4E, CTSC, CX3CR1, CXCL10, CYP1A1, EDN1, F2RL1, FCGR2A, FCGR2B, FCGR3A/FCGR3B, FUT7, GLRX, GRK6, GSN, ICAM1, IL10, IL17RA, IL18, IL1A, IL1B, IL1R1, IL1RN, IL21R, IRF6, ITGAM, ITGB2, LCN2, LEP, LGALS3, LIF, LSP1, LY96, LYZ,…	85
Cellular Movement	cell movement	cell movement of lymphocytes	7.4e-23	Abcb1b, ACKR2, ACKR3, ACTB, ADAM17, AGT, ANXA1, AOC3, APP, ARRB2, BATF, BGN, BTK, C3, CAMP, CBFB, CCL2, Ccl2, CCL20, CCL21, CCL22, CCL24, CCL3L3, CCL4, Ccl6, CCR3, CCR4, CCR6, CCR7, CCR9, CD1D, CD2, CD209, CD22, CD226, CD247, CD274, CD40, CD44, CD80, CD86, CD8A, CEACAM1, CHST4, CKLF, CMKLR1, CNR2, COL1A1, COL4A3, CTSS, CTSV, CX3CR1, CXCL10, CXCL11, CXCL13, CXCL16, CXCL3, CXCR3, CXCR4, CYSLTR1, CY…	194		Hematological System Development and Function	quantity	quantity of thymocytes	3.29e-19	ABCB1, Abcb1b, AHR, ATM, B2M, BAX, BCL11A, BCL11B, BCL2L11, BMF, CASP3, CBFB, CCNB2, CCR6, CCR7, CCR9, CD244, CD247, CD3E, CD3G, CD4, CD5, CD5L, CD7, CD80, CD86, CD8A, CD8B, CDKN1B, CDKN2A, CIITA, CORO1A, CTLA4, CTSD, CTSE, CXCR4, DCK, DCLRE1C, DNASE2, DOK1, E2F1, EEF1D, ESR1, ESR2, FADD, FCER1G, FCGR2B, FOS, FOSB, FOXO1, FYB, GADD45A, GJA1, GRAP2, IL2RB, IL2RG, IL6, IL7R, INPP5D, IRF1, ITGB2, IT…	120		Hematological System Development and Function	adhesion	adhesion of neutrophils	1.91e-11	ADAM17, ADORA1, ANXA1, CD44, CORO1A, CSF3R, CXCL2, CXCL3, CXCR1, FERMT3, FN1, GLRX, HPSE, ICAM1, IL1B, IL6, INPP5D, ITGAL, ITGAM, ITGB2, LCP1, LYN, PF4, PIK3CD, PLAUR, PLTP, PRKCQ, S100A8, S100A9, SELE, SELL, SELP, SELPLG, TLR2, TNF, VAV1, VAV3	37		Hematological System Development and Function	recruitment	recruitment of mononuclear leukocytes	9.78e-17	AGT, APOE, CASP1, CCL17, CCL19, CCL2, Ccl2, CCL21, CCL22, CCL4, CCL5, Ccl6, CCR6, CCR7, CD4, CD40, CD44, CD8A, CLEC4E, CX3CR1, CXCL10, CXCL11, CXCL16, Cxcl9, CXCR3, CXCR4, FCGR2B, FOS, ICAM1, IL10, IL18, IL1B, IL1R1, ITGA4, LEP, NLRP3, NOD2, OSM, PRKCQ, PYCARD, SELE, SELL, SELP, SELPLG, SGPL1, TLR2, TLR9, TNF, TNFRSF1B, TNFRSF8	50
Cellular Movement	cell movement	cell movement of T lymphocytes	1.05e-18	ACKR2, ACKR3, ADAM17, AGT, AOC3, APP, ARRB2, BATF, C3, CAMP, Ccl2, CCL2, CCL20, CCL21, CCL22, CCL24, CCL3L3, CCL4, CCR3, CCR4, CCR6, CCR7, CCR9, CD274, CD40, CD44, CD80, CD86, COL1A1, COL4A3, CTSS, CTSV, CXCL10, CXCL11, CXCL13, CXCL16, CXCR3, CXCR4, CYSLTR1, DIAPH1, DOCK8, DPP4, EGR2, ENPP2, ESR2, F2RL1, FAM65B, FAS, FOXO1, FOXP3, FUT4, FUT7, FYB, GATA3, HGF, HLA-A, HSPD1, ICAM1, ICOS, IFNAR1, IK…	116		Hematological System Development and Function	quantity	quantity of CD4+ T-lymphocytes	1.44e-18	ANPEP, APOE, ATM, BATF, BCL2L11, BMF, Ccl2, CCL5, CCR6, CCR7, CD247, CD28, CD3D, CD4, CD40, CD5, CD69, CD83, CD84, CD8A, CDKN2A, CIITA, CORO1A, CTLA4, CTSV, CXCL10, DCLRE1C, DOCK8, E2F1, ESR1, ESR2, GPR83, GRAP, GRAP2, HLA-A, ICOS, IL10, IL13RA1, IL17RA, IL21, IL21R, IL2RB, IL2RG, IRF1, ITGAM, ITGB2, ITGB7, ITK, JAK3, LAG3, LAT, LCK, LCP2, MMP19, NOD2, NPY1R, PIK3CD, PRF1, PRKCH, PRKCQ, PTPN2, PT…	86		Hematological System Development and Function	accumulation	accumulation of blood cells	2.67e-24	ACKR2, ADIPOQ, AGT, AHR, ANXA1, APOE, BCL2A1, BCL2L11, BCL3, C5AR1, C6, CASP8, CCL17, Ccl2, CCL2, CCL21, CCL3L3, CCL5, Ccl7, CCR7, CD1D, CD27, CD28, CD40, CD44, CD80, CD86, CD97, COL18A1, CRYAB, CTSC, CX3CR1, CXCL10, CXCL2, CXCL3, Cxcl9, CXCR3, CXCR4, CYBB, DDR1, DLX3, DOCK8, F2R, FADD, FASLG, FCGR2A, FCGR3A/FCGR3B, FGF1, GRN, HAVCR2, HDC, HMOX1, ICAM1, ICOS, IL10RA, IL11, IL17RA, IL18, IL1B, IL1…	121		Hematological System Development and Function	recruitment	recruitment of lymphocytes	8.53e-16	AGT, CCL17, CCL19, CCL2, Ccl2, CCL21, CCL22, CCL4, CCL5, Ccl6, CCR6, CCR7, CD4, CD40, CD44, CD8A, CLEC4E, CX3CR1, CXCL10, CXCL11, CXCL16, CXCR3, CXCR4, FOS, ICAM1, IL10, IL18, IL1B, IL1R1, LEP, OSM, PRKCQ, PYCARD, SELE, SELL, SELP, SELPLG, SGPL1, TLR2, TLR9, TNF, TNFRSF8	42
Cellular Movement	cell movement	cell movement of macrophages	1.93e-18	ADAM17, ADIPOQ, AGT, ANXA1, APOE, APP, AR, ARG1, B4GALT1, BID, C3, CAMP, CASP1, Ccl2, CCL2, CCL21, CCL22, CCL3L3, CCL4, CCND1, CCR6, CD44, CDKN1A, CES1, CKLF, CMKLR1, CNP, CNR2, COL4A3, CSF1R, CTSE, CX3CR1, CXCL10, CXCR3, CXCR4, CYBB, EDNRB, EEF1A2, ELN, ENG, FCAR, GLRB, GSN, HCAR2, HGF, HIF1A, HMOX1, ICAM1, IKBKG, IL10, IL16, IL17C, IL17RA, IL18, IL1B, IL1RN, IL33, IL4R, Irgm1, ITGA1, ITGAL, ITG…	132		Hematological System Development and Function	quantity	quantity of macrophages	1.29e-15	ABCA1, ADA, ADGRF5, ADIPOQ, AGT, APOE, B2M, BCL2L11, BCL3, BID, BIRC3, C4A/C4B, C5AR1, Ccl2, CCL2, CCL22, CCR6, CD200R1, CD40, CEBPA, CES1, CSF1R, CTSS, CTSV, CX3CR1, CXCL10, CXCL14, CXCR6, DDR1, FGF7, GBA, GHR, GPR132, GPR68, GRAP2, GREM1, HAVCR2, HCK, HSD11B1, IFNAR1, IL10, IL11, IL12A, IL12RB2, IL18, IL1A, IL1B, IL1R1, IL1RL1, IL2RG, IRF8, ITGB2, JAK2, KIT, LCN2, LDLR, LEPR, LGALS3, LHCGR, LIF…	96		Hematological System Development and Function	accumulation	accumulation of leukocytes	8.86e-23	ACKR2, ADIPOQ, AGT, AHR, ANXA1, APOE, BCL2A1, BCL2L11, BCL3, C5AR1, C6, CASP8, CCL17, Ccl2, CCL2, CCL21, CCL3L3, CCL5, Ccl7, CCR7, CD1D, CD27, CD28, CD40, CD44, CD80, CD86, CD97, COL18A1, CRYAB, CTSC, CX3CR1, CXCL10, CXCL2, CXCL3, Cxcl9, CXCR3, CXCR4, CYBB, DDR1, DLX3, DOCK8, F2R, FASLG, FCGR2A, FCGR3A/FCGR3B, FGF1, GRN, HAVCR2, HDC, HMOX1, ICAM1, ICOS, IL10RA, IL11, IL17RA, IL18, IL1B, IL1R1, IL…	115		Hematological System Development and Function	recruitment	recruitment of antigen presenting cells	7.48e-15	ADIPOQ, AGT, ANXA1, APOB, APOE, B4GALT1, C5AR1, CCL19, Ccl2, CCL2, CCL22, CCL4, CCL5, CD40, CD44, CD5L, CD74, CD8A, CLEC4E, CNR2, CRYAB, CSF1R, CX3CR1, CXCL10, ICAM1, IL1B, IL1RN, INPP5D, IRF5, IRF7, ITGB2, LEP, LSP1, LYN, MMP9, MPZ, OSM, P2RY2, PGF, PLGRKT, SPP1, THBS1, THBS2, TLR2, TLR4, TNF	46
Cellular Movement	cell movement	cell movement of dendritic cells	9.23e-14	ADORA1, AGT, ALCAM, APOE, C3, C5AR1, Ccl2, CCL2, CCL20, CCL21, CCL22, CCL24, CCL3L3, CCL4, Ccl9, CCR3, CCR6, CCR7, CD209, CD38, CD40, CD44, CD80, CD86, CDH1, CEACAM1, CLEC1B, CMKLR1, CTSZ, CXCL10, CXCL11, CXCL13, CXCL14, CXCR2, CXCR3, CXCR4, DOCK8, FPR1, HCLS1, HEBP1, HIF1A, ICAM1, ICAM2, ICOS, IL10, IL10RA, IL11RA, IL16, IL17C, IL18, IL1A, IL1B, IL21R, IRAK4, ITGA5, NINJ1, NLRP10, NLRP12, NLRP3,…	80		Hematological System Development and Function	quantity	quantity of dendritic cells	1.96e-14	ADA, BATF3, BCL11A, BCL3, C5AR1, CCL19, CCL2, Ccl2, CCL21, Ccl9, CCR6, CCR7, CD83, CDKN2B, CIITA, CLEC4D, CLEC4E, CSF1R, CTLA4, CXCL13, DOCK8, F2RL1, FCER1G, FCGR2B, FLT3, IFNAR1, IL10, IL12RB2, IL18, IL1RN, IL21, IL2RG, IL34, IL6, IL7R, INPP5D, IRF1, IRF8, ITGB2, JAK3, KIT, LDLR, LTB, MMP9, MYD88, NLRP10, PLP1, PTPN6, SELL, SFTPA1, SIRPA, SPI1, SPIB, SPP1, SPPL2A, TGFB1, TGFBR1, TLR2, TLR4, TNF,…	65		Hematological System Development and Function	accumulation	accumulation of myeloid cells	2.29e-16	ADIPOQ, AGT, AHR, ANXA1, APOE, BCL2A1, C5AR1, C6, CCL17, Ccl2, CCL2, CCL5, Ccl7, CD28, CD40, CD44, CD97, COL18A1, CRYAB, CTSC, CX3CR1, CXCL10, CXCL2, CXCL3, Cxcl9, DDR1, F2R, FCGR2A, FCGR3A/FCGR3B, FGF1, GRN, HAVCR2, HDC, HMOX1, IL11, IL17RA, IL18, IL1B, IL1R1, IL1RN, INPP5D, IRF1, ITGA4, ITGA6, ITGAM, ITGB2, JAK2, LTC4S, MAPK13, MAPK3, MIF, MMP3, MMP7, MMP8, MMP9, NCF1, NOS2, NR4A1, NT5E, OSM, P…	75		Hematological System Development and Function	recruitment	recruitment of T lymphocytes	7.39e-14	AGT, CCL17, CCL19, Ccl2, CCL2, CCL21, CCL22, CCL4, CCL5, CCR6, CCR7, CD4, CD40, CD44, CD8A, CXCL10, CXCL11, CXCL16, CXCR3, CXCR4, FOS, ICAM1, IL10, LEP, OSM, PYCARD, SELE, SELP, SELPLG, SGPL1, TLR9, TNF, TNFRSF8	33
Cellular Movement	cell movement	cell movement of monocytes	7.8e-12	ABCA1, ADAM17, AGT, AIF1, ANXA1, ANXA2, AOC3, APOE, APP, CAMP, CASR, Ccl2, CCL2, CCL20, CCL22, CCL4, CEACAM1, COL1A1, CTSS, CTSV, CX3CR1, CXCL10, CXCL3, CXCR2, CXCR4, ELN, ENG, F2R, FPR1, HEBP1, HGF, HP, ICAM1, IL10, IL1B, IL6, INHBA, ITGA4, ITGAL, ITGAM, ITGB2, LGALS1, LGALS3, MINOS1-NBL1/NBL1, MMP12, MMP9, MST1, NFKBIZ, NGF, NINJ1, NTN1, PF4, PLA2G6, PLA2G7, PLAUR, PLG, PRKCB, PRNP, PROK2, PTGD…	79		Hematological System Development and Function	quantity	quantity of double-positive thymocyte	3.97e-14	ABCB1, Abcb1b, ATM, BCL11B, BCL2L11, CCR6, CCR9, CD247, CD3E, CD4, CD5, CD7, CD80, CD86, CD8A, CDKN1B, CDKN2A, CIITA, CTLA4, CTSD, CTSE, CXCR4, DCK, DCLRE1C, DNASE2, E2F1, ESR1, ESR2, FOS, GRAP2, IL2RB, IL2RG, IL7R, IRF1, ITGB2, ITK, ITPKB, KLF13, LAT, LCK, LCP2, MMP19, PARL, PIK3CD, PRKCH, PRKCQ, PTPN2, PTPRC, RHOH, RUNX1, SASH3, SIT1, SPI1, ST14, STK17B, TPP2, TRAF2, VAV1, VAV3, WAS, ZAP70	61		Hematological System Development and Function	accumulation	accumulation of granulocytes	2.61e-15	ADIPOQ, AGT, AHR, ANXA1, BCL2A1, C5AR1, CCL17, Ccl2, CCL2, CCL5, Ccl7, CD97, CTSC, CXCL10, CXCL2, CXCL3, Cxcl9, FCGR2A, FCGR3A/FCGR3B, GRN, HAVCR2, HDC, IL11, IL17RA, IL18, IL1B, IL1R1, IL1RN, INPP5D, ITGA4, ITGA6, ITGAM, ITGB2, MAPK13, MAPK3, MIF, MMP7, MMP8, MMP9, NCF1, NOS2, OSM, P2RY2, POSTN, PTGDS, S100A8, S100A9, SELL, SELP, SELPLG, Slpi (includes others), TNF	52		Hematological System Development and Function	chemotaxis	chemotaxis of leukocytes	1.47e-33	ACKR2, ADAM17, ADORA1, AIF1, ANGPT1, ANXA1, APOE, B4GALT1, C3, C5AR1, C5AR2, CAMK1D, CAPG, CCL17, CCL19, Ccl2, CCL2, CCL21, CCL22, CCL3L3, CCL4, CCL5, CCR6, CCR7, CD28, CD4, CD69, CD74, CKLF, CORO1A, CSF1R, CSF2RA, CSF3R, CTSE, CX3CR1, CXADR, CXCL10, CXCL11, CXCL13, CXCL16, Cxcl3, Cxcl9, CXCR1, CXCR3, CXCR4, CYBB, CYSLTR1, EDN1, EDNRA, EDNRB, ELN, F2RL1, FCER1G, FCGR2A, FGR, GNAO1, GREM1, GRK6, G…	140
Cellular Movement	migration	migration of blood cells	4.98e-59	ABCA1, Abcb1b, ABCB4, ACKR2, ACKR3, ACTB, ADA, ADAM17, ADIPOQ, ADORA1, ADRB3, ADRBK1, AGT, AHR, AIF1, AIMP1, ALCAM, ALOX5AP, ANXA1, ANXA2, AOC3, APOE, APP, AQP1, AQP9, AR, ARG1, ARRB2, ATG16L1, B4GALT1, BATF, BGN, BID, BMP2, BTK, C1QBP, C2, C3, C4A/C4B, C5AR1, C5AR2, CAMK1D, CAMP, CAPG, CARD9, CASP1, CASR, CBFB, Ccl2, CCL2, CCL20, CCL21, CCL22, CCL24, CCL3L3, CCL4, Ccl6, Ccl7, Ccl9, CCND1, CCR3, …	477		Hematological System Development and Function	quantity	quantity of helper T lymphocytes	5.04e-14	AHR, APOE, B2M, BATF, C5AR1, CCL5, CD28, CD69, CD80, CIITA, CTLA4, EBI3, FABP5, FCGR2B, GATA3, HIF1A, ICAM1, ICOS, IFI30, IL12A, IL13RA1, IL17RA, IL1RL1, IL21R, IL4R, IL6, IRF1, ITGB8, LCP2, LEP, LGALS1, LGALS9B, MMP9, MYD88, NFIL3, PLP1, PPARG, PTPN6, SELE, SELL, SELP, SELPLG, SH2D1A, SOCS3, SPHK1, TAP1, TBX21, TGFB1, TLR4, TLR9, TNF, TOB1, VTCN1, ZFP36	54		Hematological System Development and Function	accumulation	accumulation of phagocytes	4.4e-14	AGT, AHR, ANXA1, APOE, C5AR1, C6, Ccl2, CCL2, CCL21, CCL5, CD28, CD40, CD44, COL18A1, CTSC, CX3CR1, CXCL10, CXCL2, CXCL3, DDR1, DOCK8, F2R, FCGR2A, FCGR3A/FCGR3B, FGF1, GRN, HAVCR2, HMOX1, IL17RA, IL18, IL1B, IL1R1, IL1RN, INPP5D, IRF1, ITGA4, ITGA6, ITGAM, ITGB2, LTC4S, MAPK13, MIF, MMP3, MMP7, MMP9, NOS2, NR4A1, NT5E, PTGDS, RUNX3, S100A8, S100A9, SELP, SELPLG, Slpi (includes others), THBS1, TI…	61		Hematological System Development and Function	chemotaxis	chemotaxis of myeloid cells	3.94e-32	ADORA1, AIF1, ANGPT1, ANXA1, APOE, B4GALT1, C3, C5AR1, C5AR2, CAMK1D, CAPG, CCL17, CCL19, Ccl2, CCL2, CCL21, CCL22, CCL3L3, CCL4, CCL5, CCR6, CCR7, CD28, CD4, CD69, CD74, CKLF, CORO1A, CSF1R, CSF2RA, CSF3R, CTSE, CX3CR1, CXADR, CXCL10, Cxcl3, Cxcl9, CXCR1, CXCR3, CXCR4, CYBB, EDN1, EDNRA, EDNRB, ELN, FCER1G, FCGR2A, FGR, GRK6, GRN, GSN, HCK, HP, ICAM1, IL10, IL12B, IL18, IL1B, IL1R1, IL4R, INHBA,…	121
Cellular Movement	migration	leukocyte migration	7.59e-59	ABCA1, Abcb1b, ABCB4, ACKR2, ACKR3, ACTB, ADA, ADAM17, ADIPOQ, ADORA1, ADRB3, ADRBK1, AGT, AHR, AIF1, AIMP1, ALCAM, ALOX5AP, ANXA1, ANXA2, AOC3, APOE, APP, AQP1, AQP9, AR, ARG1, ARRB2, ATG16L1, B4GALT1, BATF, BGN, BID, BMP2, BTK, C1QBP, C2, C3, C4A/C4B, C5AR1, C5AR2, CAMK1D, CAMP, CAPG, CARD9, CASP1, CASR, CBFB, Ccl2, CCL2, CCL20, CCL21, CCL22, CCL24, CCL3L3, CCL4, Ccl6, Ccl7, Ccl9, CCND1, CCR3, …	476		Hematological System Development and Function	cell movement	cell movement of leukocytes	1.76e-59	ABCA1, Abcb1b, ABCB4, ACKR2, ACKR3, ACTB, ADA, ADAM17, ADIPOQ, ADM, ADORA1, ADRB3, ADRBK1, AGT, AIF1, ALCAM, ANGPT1, ANXA1, ANXA2, AOC3, APOE, AQP9, AR, ARG1, ARRB2, B4GALT1, BATF, BCL11B, BDKRB1, BID, BTK, C2, C3, C4A/C4B, C5AR1, C5AR2, C6, CAMK1D, CAPG, CASP1, CAV1, CBFB, CCL17, CCL19, Ccl2, CCL2, CCL21, CCL22, CCL3L3, CCL4, CCL5, Ccl6, Ccl9, CCND1, CCR3, CCR6, CCR7, CCR9, CD14, CD1D, CD2, CD20…	426		Hematological System Development and Function	accumulation	accumulation of lymphocytes	1.32e-13	ACKR2, ADIPOQ, AGT, APOE, BCL2L11, BCL3, CASP8, CCL17, Ccl2, CCL2, CCL21, CCL3L3, CCL5, CCR7, CD1D, CD27, CD28, CD40, CD80, CD86, CX3CR1, CXCL10, CXCL3, CXCR3, CXCR4, DLX3, FASLG, ICAM1, ICOS, IL10RA, IL11, IL17RA, IL21R, IL2RG, IL6, ITGAL, ITGB2, KLF2, LAT, MLLT11, NT5E, PRKCQ, PTPN1, RASGRP1, RIPK3, RUNX3, SELE, SELL, SH2D2A, SH3BP2, TLR9, TNF, TNFAIP8L2, TNFRSF8, TNFSF13, Tnfsf9	56		Hematological System Development and Function	chemotaxis	chemotaxis of phagocytes	1.03e-31	ADORA1, AIF1, ANGPT1, ANXA1, APOE, B4GALT1, C3, C5AR1, C5AR2, CAMK1D, CAPG, CCL17, CCL19, CCL2, Ccl2, CCL21, CCL22, CCL3L3, CCL4, CCL5, CCR6, CCR7, CD28, CD4, CD69, CD74, CKLF, CORO1A, CSF1R, CSF2RA, CSF3R, CTSE, CX3CR1, CXADR, CXCL10, Cxcl3, CXCR1, CXCR3, CXCR4, CYBB, EDN1, EDNRA, EDNRB, ELN, FCER1G, FCGR2A, FGR, GRK6, GRN, GSN, HCK, HP, ICAM1, IL10, IL12B, IL18, IL1A, IL1B, IL1R1, IL4R, INHBA, …	121
Cellular Movement	migration	migration of cells	2.11e-47	A2M, ABCA1, Abcb1b, ABCB4, ABCC4, ABI3, ACKR2, ACKR3, ACSL4, ACTB, ACTR3, ADA, ADAM17, ADAM19, Adam1a, ADAMTS1, ADARB1, ADGRB1, ADIPOQ, ADORA1, ADRB3, ADRBK1, AGT, AHCY, AHR, AIF1, AIMP1, ALCAM, ALOX5AP, ANGPTL3, ANGPTL4, ANPEP, ANXA1, ANXA2, AOC3, APAF1, APLN, APOE, APP, AQP1, AQP4, AQP9, AR, AREG, ARF6, ARG1, ARHGAP31, ARHGAP4, ARHGAP8/PRR5-ARHGAP8, ARHGDIA, ARHGDIB, ARHGEF28, ARPC2, ARRB2, ASP…	826		Hematological System Development and Function	cell movement	cell movement of phagocytes	4.42e-42	ABCA1, ADAM17, ADIPOQ, ADM, ADORA1, ADRB3, ADRBK1, AGT, AIF1, ALCAM, ANGPT1, ANXA1, ANXA2, AOC3, APOE, AQP9, AR, ARG1, B4GALT1, BID, BTK, C2, C3, C4A/C4B, C5AR1, C5AR2, C6, CAMK1D, CAPG, CASP1, CAV1, CCL17, CCL19, Ccl2, CCL2, CCL21, CCL22, CCL3L3, CCL4, CCL5, Ccl9, CCND1, CCR3, CCR6, CCR7, CD14, CD209, CD28, CD38, CD4, CD40, CD44, CD55, CD69, CD80, CD86, CD9, CDH1, CDKN1A, CEBPE, CES1, CFB, CFH, …	299		Hematological System Development and Function	accumulation	accumulation of mononuclear leukocytes	2.29e-13	ACKR2, ADIPOQ, AGT, APOE, BCL2L11, BCL3, CASP8, CCL17, Ccl2, CCL2, CCL21, CCL3L3, CCL5, CCR7, CD1D, CD27, CD28, CD40, CD80, CD86, CX3CR1, CXCL10, CXCL2, CXCL3, CXCR3, CXCR4, DLX3, FASLG, ICAM1, ICOS, IL10RA, IL11, IL17RA, IL18, IL21R, IL2RG, IL6, ITGAL, ITGB2, KLF2, LAT, MLLT11, NT5E, PRKCQ, PTGDS, PTPN1, RASGRP1, RIPK3, RUNX3, SELE, SELL, SH2D2A, SH3BP2, TLR9, TNF, TNFAIP8L2, TNFRSF8, TNFSF13, T…	59		Hematological System Development and Function	chemotaxis	chemotaxis of neutrophils	2.49e-25	ADORA1, C3, C5AR1, C5AR2, CAMK1D, CAPG, CCL19, Ccl2, CCL2, CCL21, CCL3L3, CCL4, CCL5, CCR6, CCR7, CD28, CD69, CD74, CKLF, CORO1A, CSF2RA, CSF3R, CXADR, CXCL10, Cxcl3, CXCR1, EDN1, EDNRA, FCER1G, FCGR2A, FGR, GRK6, GRN, GSN, HCK, ICAM1, IL18, IL1B, IL1R1, INPP5D, ITGA4, ITGAM, ITGB2, LCN2, LGALS3, LSP1, LYN, MYO1F, NCKAP1L, NOD2, PDE4B, PF4, PIK3CD, PIK3R5, PRKCA, PTPN6, RAC2, RASGRP4, S100A8, S10…	76
Cellular Movement	migration	migration of phagocytes	1.53e-25	ABCA1, ADAM17, ADIPOQ, AGT, ALCAM, ANXA1, ANXA2, AOC3, APOE, APP, AR, C3, CAMP, Ccl2, CCL2, CCL20, CCL21, CCL22, CCL3L3, CCL4, Ccl9, CCND1, CCR7, CD209, CD38, CD40, CD44, CD80, CD86, CDH1, CEACAM1, CEBPE, CLEC11A, CLEC1B, CMKLR1, COL1A1, CSF1R, CTSS, CTSV, CTSZ, CX3CR1, CXCL10, CXCL11, CXCL13, CXCL2, CXCL3, CXCL6, CXCR2, CXCR3, CXCR4, CYBB, DDR2, DOCK8, ENG, F10, FAS, FGR, FPR1, Gm21596/Hmgb1, HC…	150		Hematological System Development and Function	cell movement	cell movement of myeloid cells	4.71e-42	ABCA1, ADAM17, ADIPOQ, ADM, ADORA1, ADRB3, ADRBK1, AGT, AIF1, ANGPT1, ANXA1, ANXA2, AOC3, APOE, AQP9, AR, ARG1, ARRB2, B4GALT1, BID, BTK, C2, C3, C4A/C4B, C5AR1, C5AR2, C6, CAMK1D, CAPG, CASP1, CAV1, CBFB, CCL17, CCL19, CCL2, Ccl2, CCL21, CCL22, CCL3L3, CCL4, CCL5, CCND1, CCR3, CCR6, CCR7, CD14, CD2, CD28, CD4, CD44, CD55, CD69, CD9, CDKN1A, CEBPE, CES1, CFB, CFH, CFTR, CKLF, CLEC11A, CMA1, CMKLR…	294		Hematological System Development and Function	homeostasis	T cell homeostasis	4.86e-23	ADA, ADAM17, AHR, ANXA1, ATM, BATF, BCL11A, BCL11B, BCL2A1, BCL2L11, BCL3, BCL6, BIRC5, BMF, BMP4, BRCA1, C5AR1, CADM1, CASP1, CASP3, CASP8, CBFB, CCL19, CCNB2, CCND1, CCR7, CCR9, CD1D, CD2, CD226, CD244, CD247, CD28, CD3D, CD3E, CD3G, CD4, CD5, CD6, CD69, CD80, CD83, CD86, CD8A, CD8B, CDKN1A, CDKN2A, CHST3, CIITA, CISH, CNR2, CORO1A, CXCR4, DCLRE1C, DNASE2, DNTT, DOK1, EPHA1, F5, FADD, FCER1G, F…	195		Hematological System Development and Function	chemotaxis	chemotaxis of granulocytes	3.46e-23	ADORA1, ANXA1, C3, C5AR1, C5AR2, CAMK1D, CAPG, CCL19, Ccl2, CCL2, CCL21, CCL3L3, CCL4, CCL5, CCR6, CCR7, CD28, CD69, CD74, CKLF, CORO1A, CSF2RA, CSF3R, CXADR, CXCL10, Cxcl3, Cxcl9, CXCR1, CXCR3, EDN1, EDNRA, FCER1G, FCGR2A, FGR, GRK6, GRN, GSN, HCK, ICAM1, IL10, IL18, IL1B, IL1R1, INPP5D, ITGA4, ITGAM, ITGB2, LCN2, LGALS3, LSP1, LYN, MYO1F, NCKAP1L, NOD2, PDE4B, PF4, PIK3CD, PIK3R5, PLAUR, PRKCA,…	81
Cellular Movement	migration	migration of mononuclear leukocytes	8.81e-25	ABCA1, Abcb1b, ACKR2, ACKR3, ACTB, ADAM17, AGT, ANXA1, ANXA2, AOC3, APP, ARRB2, BATF, BTK, C3, CAMP, Ccl2, CCL2, CCL20, CCL21, CCL22, CCL24, CCL3L3, CCL4, Ccl6, CCR3, CCR4, CCR6, CCR7, CCR9, CD1D, CD2, CD209, CD22, CD226, CD247, CD274, CD40, CD44, CD80, CD86, CD8A, CEACAM1, CMKLR1, COL1A1, COL4A3, CTSS, CTSV, CX3CR1, CXCL10, CXCL11, CXCL13, CXCL16, CXCL3, CXCR3, CXCR4, CYSLTR1, CYTIP, DIAPH1, DOC…	188		Hematological System Development and Function	cell movement	cell movement of mononuclear leukocytes	3.92e-35	ABCA1, Abcb1b, ACKR2, ACKR3, ACTB, ADAM17, AGT, AIF1, ANGPT1, ANXA1, ANXA2, AOC3, APOE, ARRB2, BATF, BCL11B, BTK, C3, C6, CBFB, CCL17, CCL19, CCL2, Ccl2, CCL21, CCL22, CCL3L3, CCL4, CCL5, Ccl6, CCR3, CCR6, CCR7, CCR9, CD1D, CD2, CD209, CD22, CD226, CD247, CD28, CD3E, CD4, CD40, CD44, CD55, CD69, CD80, CD86, CD8A, CIITA, CKLF, CMKLR1, CNR2, COL1A1, COL4A3, CTLA4, CTSS, CTSV, CX3CR1, CXCL10, CXCL11…	247		Hematological System Development and Function	development	development of lymphocytes	1.64e-22	ABCG1, ADA, ADAM17, AHR, ANXA1, ATM, BATF, BCL11A, BCL11B, BCL2A1, BCL2L11, BCL3, BCL6, BIRC5, BLK, BLNK, BMP4, BRCA1, BST1, BTK, C5AR1, CADM1, CASP1, CASP8, CBFB, CCND1, CCR7, CCR9, CD1D, CD2, CD226, CD244, CD247, CD28, CD3D, CD3E, CD3G, CD4, CD5, CD6, CD69, CD80, CD83, CD86, CD8A, CD8B, CDKN1A, CDKN2A, CIITA, CISH, CLEC11A, CNR2, CSF3R, CXCR4, DCLRE1C, DNASE2, DNTT, DOK1, EPHA1, EZH2, F5, FADD,…	205		Hematological System Development and Function	chemotaxis	chemotaxis of mononuclear leukocytes	1.83e-13	ACKR2, ADAM17, AIF1, ANGPT1, ANXA1, CCL17, CCL19, CCL2, Ccl2, CCL21, CCL22, CCL4, CCL5, CCR7, CKLF, CXCL10, CXCL11, CXCL13, CXCL16, Cxcl9, CXCR1, CXCR3, CXCR4, CYSLTR1, ELN, GNAO1, HLA-G, HP, IL10, IL12B, IL1B, INHBA, ITGAL, LAT, LCP1, LGALS3, MMP9, MST1, PF4, PIK3CD, PLA2G6, PLA2G7, PLAUR, PTPRO, RAC2, RGS1, S100B, SELE, SERPINA3, SOCS3, SPP1, THBS1, THBS2, TLR2, TLR4, TNF, TNFRSF14, TNFSF11, VI…	61
Cellular Movement	migration	Lymphocyte migration	9.91e-23	Abcb1b, ACKR2, ACKR3, ACTB, ADAM17, AGT, ANXA1, AOC3, APP, ARRB2, BATF, BTK, C3, CAMP, Ccl2, CCL2, CCL20, CCL21, CCL22, CCL24, CCL3L3, CCL4, Ccl6, CCR3, CCR4, CCR6, CCR7, CCR9, CD1D, CD2, CD209, CD22, CD226, CD247, CD274, CD40, CD44, CD80, CD86, CD8A, CEACAM1, CMKLR1, COL1A1, COL4A3, CTSS, CTSV, CX3CR1, CXCL10, CXCL11, CXCL13, CXCL16, CXCL3, CXCR3, CXCR4, CYSLTR1, CYTIP, DIAPH1, DOCK8, DPP4, EFNB…	173		Hematological System Development and Function	cell movement	cell movement of granulocytes	7.62e-33	ADAM17, ADIPOQ, ADM, ADORA1, ADRB3, ADRBK1, AGT, ANXA1, AOC3, APOE, AQP9, ARRB2, B4GALT1, BTK, C2, C3, C4A/C4B, C5AR1, C5AR2, CAMK1D, CAPG, CASP1, CBFB, CCL17, CCL19, CCL2, Ccl2, CCL21, CCL3L3, CCL4, CCL5, CCR3, CCR6, CCR7, CD14, CD2, CD28, CD44, CD55, CD69, CEBPE, CFB, CFH, CFTR, CKLF, CLEC11A, CMA1, CMKLR1, CORO1A, CRYAB, CSF2RA, CSF3R, CST3, CTSB, CXADR, CXCL10, CXCL11, CXCL14, CXCL2, CXCL3, C…	205		Hematological System Development and Function	development	development of mononuclear leukocytes	1.73e-22	ABCG1, ADA, ADAM17, AHR, ANXA1, ATM, BATF, BCL11A, BCL11B, BCL2A1, BCL2L11, BCL3, BCL6, BIRC5, BLK, BLNK, BMP4, BRCA1, BST1, BTK, C5AR1, CADM1, CASP1, CASP8, CBFB, CCND1, CCR7, CCR9, CD1D, CD2, CD226, CD244, CD247, CD28, CD3D, CD3E, CD3G, CD4, CD5, CD6, CD69, CD80, CD83, CD86, CD8A, CD8B, CDKN1A, CDKN2A, CIITA, CISH, CLEC11A, CNR2, CSF3R, CXCL11, CXCR4, DCLRE1C, DNASE2, DNTT, DOK1, EPHA1, EZH2, F…	206		Hematological System Development and Function	development	development of mononuclear leukocytes	3.34e-32	ABCG1, ADA, ADAM17, AHR, ANXA1, ATM, BATF, BBC3, BCL11B, BCL2A1, BCL2L11, BIRC5, BLNK, BST1, BTK, C5AR1, CADM1, CASP1, CASP8, CBFB, CCR7, CCR9, CD1D, CD2, CD226, CD244, CD247, CD274, CD28, CD3D, CD3E, CD3G, CD4, CD5, CD6, CD69, CD74, CD80, CD83, CD86, CD8A, CD8B, CDKN2A, CISH, CNR2, CSF3R, CXCL11, CXCR4, DCLRE1C, DKK1, DNASE2, DNTT, DOK1, DOK2, EGR2, EPHA4, FCER1G, FCGR2A, FCGR2B, FLT3, FOS, HAVC…	192
Cellular Movement	migration	T cell migration	1.41e-19	Abcb1b, ACKR2, ACKR3, ACTB, ADAM17, AGT, AOC3, APP, ARRB2, BATF, C3, CAMP, Ccl2, CCL2, CCL20, CCL21, CCL22, CCL24, CCL3L3, CCL4, CCR3, CCR4, CCR6, CCR7, CCR9, CD274, CD40, CD44, CD80, CD86, CEACAM1, COL1A1, COL4A3, CTSS, CTSV, CXCL10, CXCL11, CXCL13, CXCL16, CXCR3, CXCR4, CYSLTR1, DIAPH1, DOCK8, DPP4, EGR2, ENPP2, ESR2, EZR, F2RL1, FAM65B, FAS, FOXO1, FOXP3, FUT4, FUT7, FYB, GATA3, GRK6, HGF, HLA…	129		Hematological System Development and Function	cell movement	cell movement of neutrophils	1.05e-29	ADAM17, ADIPOQ, ADM, ADORA1, ADRB3, ADRBK1, AGT, ANXA1, APOE, AQP9, B4GALT1, BTK, C2, C3, C4A/C4B, C5AR1, C5AR2, CAMK1D, CAPG, CASP1, CCL19, CCL2, Ccl2, CCL21, CCL3L3, CCL4, CCL5, CCR6, CCR7, CD14, CD28, CD44, CD55, CD69, CEBPE, CFB, CFH, CFTR, CKLF, CMKLR1, CORO1A, CSF2RA, CSF3R, CST3, CTSB, CXADR, CXCL10, CXCL14, CXCL2, Cxcl3, CXCL3, CXCL6, CXCR1, CYBB, DDR2, ELANE, F10, F2RL1, FASLG, FCER1G, F…	167		Hematological System Development and Function	development	development of leukocytes	7.09e-22	ABCG1, ADA, ADAM17, AHR, ANXA1, ATM, BATF, BCL11A, BCL11B, BCL2A1, BCL2L11, BCL3, BCL6, BIRC5, BLK, BLNK, BMP4, BRCA1, BST1, BTK, C5AR1, CADM1, CASP1, CASP8, CBFB, CCND1, CCR7, CCR9, CD1D, CD2, CD226, CD244, CD247, CD28, CD3D, CD3E, CD3G, CD4, CD5, CD6, CD69, CD80, CD83, CD86, CD8A, CD8B, CD9, CDKN1A, CDKN2A, CIITA, CISH, CLEC11A, CNR2, CSF1R, CSF2RA, CSF3R, CXCL11, CXCR4, DCLRE1C, DNASE2, DNTT, …	213		Hematological System Development and Function	development	development of lymphocytes	3.75e-32	ABCG1, ADA, ADAM17, AHR, ANXA1, ATM, BATF, BBC3, BCL11B, BCL2A1, BCL2L11, BIRC5, BLNK, BST1, BTK, C5AR1, CADM1, CASP1, CASP8, CBFB, CCR7, CCR9, CD1D, CD2, CD226, CD244, CD247, CD274, CD28, CD3D, CD3E, CD3G, CD4, CD5, CD6, CD69, CD74, CD80, CD83, CD86, CD8A, CD8B, CDKN2A, CISH, CNR2, CSF3R, CXCR4, DCLRE1C, DKK1, DNASE2, DNTT, DOK1, DOK2, EGR2, EPHA4, FCER1G, FCGR2A, FCGR2B, FLT3, FOS, HAVCR2, HLA-…	191
Cellular Movement	migration	migration of antigen presenting cells	9.21e-18	ADIPOQ, AGT, ALCAM, APOE, AR, C3, Ccl2, CCL2, CCL20, CCL21, CCL22, CCL3L3, CCL4, Ccl9, CCND1, CCR7, CD209, CD38, CD40, CD44, CD80, CD86, CDH1, CEACAM1, CLEC1B, CMKLR1, CSF1R, CTSZ, CXCL10, CXCL11, CXCL13, CXCR3, CXCR4, CYBB, DOCK8, ENG, HCLS1, HGF, HIF1A, ICAM1, ICAM2, ICOS, IL10, IL10RA, IL16, IL18, IL1B, IL1RN, IL21R, ITGA1, ITGA5, ITGAL, LGALS3, MAPKAPK2, MDK, MMP12, MST1, MYLK, NLRP10, NLRP12…	92		Hematological System Development and Function	cell movement	cell movement of lymphocytes	8.08e-28	Abcb1b, ACKR2, ACKR3, ACTB, ADAM17, AGT, ANXA1, AOC3, ARRB2, BATF, BCL11B, BTK, C3, C6, CBFB, CCL17, CCL19, CCL2, Ccl2, CCL21, CCL22, CCL3L3, CCL4, CCL5, Ccl6, CCR3, CCR6, CCR7, CCR9, CD1D, CD2, CD209, CD22, CD226, CD247, CD28, CD3E, CD4, CD40, CD44, CD69, CD80, CD86, CD8A, CKLF, CMKLR1, CNR2, COL1A1, COL4A3, CTLA4, CTSS, CTSV, CX3CR1, CXCL10, CXCL11, CXCL13, CXCL16, CXCL3, CXCR3, CXCR4, CXCR5, C…	203		Hematological System Development and Function	development	T cell development	6.54e-21	ADA, ADAM17, AHR, ANXA1, ATM, BATF, BCL11A, BCL11B, BCL2A1, BCL2L11, BCL3, BCL6, BIRC5, BMP4, BRCA1, C5AR1, CADM1, CASP1, CBFB, CCND1, CCR7, CCR9, CD1D, CD2, CD226, CD244, CD247, CD28, CD3D, CD3E, CD3G, CD4, CD5, CD6, CD69, CD80, CD83, CD86, CD8A, CD8B, CDKN1A, CDKN2A, CIITA, CISH, CNR2, CXCR4, DCLRE1C, DNASE2, DNTT, DOK1, EPHA1, F5, FADD, FCER1G, FCGR2A, FCGR2B, FOXO1, FZD8, GNRH1, HAVCR2, HLA-D…	186		Hematological System Development and Function	development	development of leukocytes	1.42e-31	ABCG1, ADA, ADAM17, ADAR, AHR, ALOX15, ANXA1, ATM, BATF, BBC3, BCL11B, BCL2A1, BCL2L11, BIRC5, BLNK, BST1, BTK, C5AR1, CADM1, CASP1, CASP8, CBFB, CCR7, CCR9, CD1D, CD2, CD226, CD244, CD247, CD274, CD28, CD3D, CD3E, CD3G, CD4, CD5, CD6, CD69, CD74, CD80, CD83, CD86, CD8A, CD8B, CDKN2A, CISH, CNR2, CSF1R, CSF2RA, CSF3R, CXCL11, CXCR4, DCLRE1C, DKK1, DNASE2, DNTT, DOK1, DOK2, EGR2, EIF2AK2, EPHA4, F…	198
Cellular Movement	migration	migration of myeloid cells	2.88e-17	ADAM17, ADORA1, ANXA1, AOC3, C3, CAMP, Ccl2, CCL2, CCL24, CCL3L3, CCL4, CCR3, CD44, CEACAM1, CEBPE, CLEC11A, CXCL10, CXCL11, CXCL2, CXCL3, CXCL6, CXCR2, CYBB, DDR2, ENG, F10, FAS, FGR, FPR1, Gm21596/Hmgb1, HCK, HMOX1, ICAM1, ICAM2, IL16, IL17RA, IL18, IL1B, IL33, IL6, INPP5D, ITGA4, ITGAL, ITGAM, ITGB2, LEP, LGALS1, LSP1, MAPKAPK2, MDK, MMP9, MYD88, MYLK, MYLK3, NLRP12, NLRP3, NOS2, P2RY6, PARP1,…	86		Hematological System Development and Function	cell movement	cell movement of antigen presenting cells	1.52e-25	ACKR2, ADAM17, ADIPOQ, ADORA1, AGT, ALCAM, ANXA1, APOE, AR, ARG1, B4GALT1, BID, C3, C5AR1, C6, CASP1, CAV1, CCL17, CCL19, Ccl2, CCL2, CCL21, CCL22, CCL3L3, CCL4, CCL5, Ccl9, CCND1, CCR3, CCR6, CCR7, CD209, CD38, CD40, CD44, CD80, CD86, CDH1, CDKN1A, CES1, CKLF, CLEC4M, CMKLR1, CNR1, CNR2, COL4A3, CSF1R, CTSE, CTSZ, CX3CR1, CXCL10, CXCL11, CXCL13, CXCL14, CXCR1, CXCR3, CXCR4, CYBB, CYSLTR2, DOCK8,…	180		Hematological System Development and Function	development	development of blood cells	6.97e-21	ABCG1, ADA, ADAM17, AHR, ANGPT1, ANXA1, ATM, BATF, BCL11A, BCL11B, BCL2A1, BCL2L11, BCL3, BCL6, BIRC5, BLK, BLNK, BMP4, BRCA1, BRCA2, BST1, BTK, C5AR1, CADM1, CASP1, CASP8, CBFB, CCND1, CCR7, CCR9, CD1D, CD2, CD226, CD244, CD247, CD28, CD3D, CD3E, CD3G, CD4, CD5, CD6, CD69, CD80, CD83, CD86, CD8A, CD8B, CD9, CDKN1A, CDKN2A, CIITA, CISH, CLEC11A, CNR2, Crip2, CSF1R, CSF2RA, CSF3R, CXCL11, CXCR4, D…	229		Hematological System Development and Function	development	development of blood cells	3.58e-31	ABCG1, ADA, ADAM17, ADAR, AHR, ALOX15, ANGPT1, ANK1, ANXA1, ATM, BATF, BBC3, BCL11B, BCL2A1, BCL2L11, BIRC5, BLNK, BST1, BTK, C5AR1, CADM1, CASP1, CASP8, CBFB, CCR7, CCR9, CD1D, CD2, CD226, CD244, CD247, CD274, CD28, CD3D, CD3E, CD3G, CD4, CD5, CD6, CD69, CD74, CD80, CD83, CD86, CD8A, CD8B, CDKN2A, CISH, CNR2, Crip2, CSF1R, CSF2RA, CSF3R, CXCL11, CXCR4, DCLRE1C, DKK1, DNASE2, DNTT, DOK1, DOK2, EB…	213
Cellular Movement	migration	migration of granulocytes	1.8e-15	ADORA1, ANXA1, AOC3, C3, CAMP, Ccl2, CCL2, CCL24, CCL3L3, CCL4, CCR3, CD44, CEACAM1, CEBPE, CLEC11A, CXCL10, CXCL11, CXCL2, CXCL3, CXCL6, CXCR2, CYBB, DDR2, ENG, F10, FAS, FGR, FPR1, Gm21596/Hmgb1, HCK, ICAM1, ICAM2, IL16, IL17RA, IL18, IL1B, IL33, IL6, INPP5D, ITGAL, ITGAM, ITGB2, LEP, LGALS1, LSP1, MAPKAPK2, MMP9, MYD88, MYLK, MYLK3, NLRP12, NLRP3, NOS2, PDE4B, PIK3CD, PIK3R1, PIK3R5, PLAU, PLA…	75		Hematological System Development and Function	cell movement	cell movement of T lymphocytes	5.59e-22	ACKR2, ACKR3, ADAM17, AGT, AOC3, ARRB2, BATF, BCL11B, C3, C6, CCL17, CCL19, Ccl2, CCL2, CCL21, CCL22, CCL3L3, CCL4, CCL5, CCR3, CCR6, CCR7, CCR9, CD28, CD40, CD44, CD69, CD80, CD86, COL1A1, COL4A3, CTLA4, CTSS, CTSV, CXCL10, CXCL11, CXCL13, CXCL16, CXCR3, CXCR4, CXCR5, CYSLTR1, DOCK8, EGR2, ENPP2, ESR2, F2RL1, FAM65B, FASLG, FN1, FOXO1, FUT4, FUT7, FYB, GATA3, HGF, HLA-A, ICAM1, ICOS, IFNAR1, IL1…	121		Hematological System Development and Function	response	response of lymphocytes	1.66e-22	ADA, AHR, BCL2L11, C5AR1, CASP1, CASP3, CCL19, Ccl2, CCL2, CCL21, CCR6, CD180, CD1D, CD200R1, CD28, CD3E, CD4, CD40, CD6, CD80, CD83, CD86, CD8A, CH25H, CLEC7A, CTSS, CXCL11, CYP7B1, DAPP1, DOCK8, EBI3, FADD, FCGR2A, FCGR2B, FOXO1, GZMB, HAVCR2, HMOX1, ICAM1, ICOS, IL10RA, IL12RB2, IL18, IL1B, IL1R1, IL21R, IL6, IL7R, ITK, ITPKB, Klra4 (includes others), KLRB1, LAG3, LAX1, LCP2, LIF, LTB, LYN, MS…	92		Hematological System Development and Function	development	T cell development	1.71e-30	ADA, ADAM17, AHR, ANXA1, ATM, BATF, BBC3, BCL11B, BCL2A1, BCL2L11, BIRC5, C5AR1, CADM1, CASP1, CBFB, CCR7, CCR9, CD1D, CD2, CD226, CD244, CD247, CD274, CD28, CD3D, CD3E, CD3G, CD4, CD5, CD6, CD69, CD74, CD80, CD83, CD86, CD8A, CD8B, CDKN2A, CISH, CNR2, CXCR4, DCLRE1C, DKK1, DNASE2, DNTT, DOK1, DOK2, EGR2, EPHA4, FCER1G, FCGR2A, FCGR2B, HAVCR2, HLA-DOA, HLA-DQA1, HLA-DQB1, HLA-G, HMGA1, ICAM1, ICO…	175
Cellular Movement	homing	homing	3.18e-35	ACKR2, ACKR3, ACTR2, ADAM17, ADORA1, ADRBK1, AGT, AIF1, AIMP1, ANXA1, ANXA2, AOC3, APLN, APOE, APP, AQP9, ARPC2, ARRB2, B4GALT1, BATF, BIN2, BMP2, BMP4, C1QBP, C3, C4A/C4B, C5AR1, C5AR2, CAMK1D, CAMP, CAPG, CASR, CCL2, Ccl2, CCL20, CCL21, CCL22, CCL24, CCL3L3, CCL4, Ccl6, Ccl9, CCND1, CCR3, CCR4, CCR6, CCR7, CCR9, CD38, CD44, CD9, CDKN1A, CEACAM1, CHST4, CKLF, CLCN3, CMKLR1, CNR2, COL4A3, CORO1A,…	297		Hematological System Development and Function	cell movement	cell movement of macrophages	1.48e-19	ADAM17, ADIPOQ, AGT, ANXA1, APOE, AR, ARG1, B4GALT1, BID, C3, C6, CASP1, CAV1, Ccl2, CCL2, CCL21, CCL22, CCL3L3, CCL4, CCL5, CCND1, CCR6, CD44, CDKN1A, CES1, CKLF, CMKLR1, CNR1, CNR2, COL4A3, CSF1R, CTSE, CX3CR1, CXCL10, CXCR3, CXCR4, CYBB, CYSLTR2, EGLN3, ELN, FASLG, GAL3ST1, GBA, GLRB, GSN, HGF, HIF1A, HMOX1, ICAM1, IL10, IL16, IL17RA, IL18, IL1B, IL1RN, IL4R, IRF6, Irgm1, ITGA1, ITGAL, ITGB2, …	133		Hematological System Development and Function	response	T cell response	9e-17	ADA, AHR, C5AR1, CASP1, CASP3, CCL19, Ccl2, CCL2, CCL21, CD1D, CD200R1, CD28, CD3E, CD4, CD6, CD80, CD86, CD8A, CLEC7A, CXCL11, DOCK8, EBI3, FOXO1, GZMB, HAVCR2, HMOX1, ICAM1, ICOS, IL10RA, IL12RB2, IL18, IL1B, IL1R1, IL21R, IL6, IL7R, ITK, LAG3, LAX1, LIF, LTB, NFIL3, NOS2, OASL, PDCD1, PGAP3, PIK3R1, PLAUR, PON1, POSTN, PSMB10, PTPN6, PYCARD, RET, SELPLG, SEMA4A, SIPA1, SOCS3, STAT4, TBX21, THY…	71		Hematological System Development and Function	development	development of hematopoietic system	3.84e-15	ABCG2, ADAM17, ADAR, ALOX15, BBC3, BCL11B, BCL2L11, BIRC5, BLNK, BTK, CBFB, CCR9, CD3D, CD3E, CD3G, CD40, CD44, CD74, CD83, CDKN2A, CSF3R, CXCR4, DKK1, EGR2, EIF2AK2, FLT3, FOS, FST, HTR4, ICOS, IL10, IL1RN, IL2RB, IL2RG, IL7R, IRF1, JAK2, JAK3, Klra4 (includes others), LAT, LAT2, LAX1, LCP2, LFNG, LRRC17, LYL1, LYN, MLLT11, NOS1, PDCD1, PIM1, PLA2G6, PLCG2, PRDM1, PSTPIP2, PTPRC, RASGRP1, RASGRP…	80
Cellular Movement	homing	homing of cells	1.91e-33	ACKR2, ACKR3, ACTR2, ADAM17, ADORA1, ADRBK1, AGT, AIF1, ANXA1, ANXA2, AOC3, APLN, APOE, APP, AQP9, ARPC2, ARRB2, B4GALT1, BATF, BIN2, BMP2, BMP4, C1QBP, C3, C4A/C4B, C5AR1, C5AR2, CAMK1D, CAMP, CAPG, CASR, CCL2, Ccl2, CCL20, CCL21, CCL22, CCL24, CCL3L3, CCL4, Ccl6, Ccl9, CCND1, CCR3, CCR4, CCR6, CCR7, CCR9, CD38, CD44, CD9, CDKN1A, CEACAM1, CHST4, CKLF, CLCN3, CMKLR1, CNR2, COL4A3, CORO1A, CSF1R,…	286		Hematological System Development and Function	cell movement	cell movement of dendritic cells	3.6e-14	ADORA1, AGT, ALCAM, APOE, C3, C5AR1, CCL17, CCL19, CCL2, Ccl2, CCL21, CCL22, CCL3L3, CCL4, CCL5, Ccl9, CCR3, CCR6, CCR7, CD209, CD38, CD40, CD44, CD80, CD86, CDH1, CLEC4M, CMKLR1, CTSZ, CXCL10, CXCL11, CXCL13, CXCL14, CXCR1, CXCR3, CXCR4, DOCK8, HCLS1, HEBP1, HIF1A, HRH1, ICAM1, ICOS, IL10, IL10RA, IL11RA, IL16, IL18, IL1A, IL1B, IL21R, IRAK4, KIT, NINJ1, NLRP10, NLRP3, PDPN, PIK3CD, PLAU, PLCG2,…	80		Hematological System Development and Function	blood pressure	blood pressure	1.25e-19	ABAT, ACE, ACE2, ACTA2, ADIPOQ, ADORA1, ADRA1A, ADRA1B, ADRA1D, ADRA2B, ADRB1, AGT, Agtr1b, AHR, ALOX12, AOC3, APLN, APLNR, APOE, ARG2, ARNTL, ARSB, ATP1A2, AVPR2, BACH1, BDKRB1, BDKRB2, BDNF, CACNA1B, CACNA1C, CACNB3, CD44, CKM, CNR1, COL1A2, COL4A3, CRYAB, CYBA, CYBB, DBP, DDAH1, EDNRA, EDNRB, EGLN3, ELN, EPHB6, EPHX2, ESR2, F2R, F2RL1, GBP5, GDNF, GHR, GNB3, GPX1, GRK4, GUCY1A2, Hba1/Hba2, HMO…	121		Hematological System Development and Function	development	development of hematopoietic cells	1.71e-14	ADAM17, ADAR, ALOX15, BBC3, BCL11B, BCL2L11, BIRC5, BLNK, BTK, CBFB, CCR9, CD3D, CD3E, CD3G, CD74, CD83, CDKN2A, CSF3R, CXCR4, DKK1, EGR2, EIF2AK2, FLT3, HTR4, ICOS, IL10, IL2RB, IL2RG, IL7R, IRF1, JAK2, JAK3, Klra4 (includes others), LAT, LAT2, LAX1, LCP2, LFNG, LYN, MLLT11, PDCD1, PIM1, PLCG2, PSTPIP2, PTPRC, RASGRP1, RASGRP4, RUNX1, SATB1, SIT1, SOCS1, SPI1, SPIB, SYK, THEMIS2, TNF, TNFSF11, T…	66
Cellular Movement	homing	homing of blood cells	3.29e-33	ACKR2, ACKR3, ADAM17, ADORA1, AIF1, ANXA1, AOC3, APOE, APP, AQP9, B4GALT1, BATF, BMP4, C1QBP, C3, C5AR1, C5AR2, CAMK1D, CAMP, CAPG, CASR, CCL2, Ccl2, CCL20, CCL21, CCL22, CCL24, CCL3L3, CCL4, CCND1, CCR3, CCR4, CCR6, CCR7, CCR9, CD38, CD44, CD9, CDKN1A, CHST4, CKLF, CMKLR1, CNR2, CORO1A, CSF1R, CSF2RA, CSF3R, CST3, CTSE, CX3CR1, CXCL10, CXCL11, CXCL13, CXCL14, CXCL16, CXCL2, Cxcl3, CXCL3, CXCL6, …	210		Hematological System Development and Function	proliferation	proliferation of immune cells	9.6e-48	A2M, ABCB1, ABCG1, ACPP, ACTL6A, ADA, ADIPOQ, AHR, AIF1, ANPEP, ANXA1, APOE, ARF6, ARG1, Art2b, ATM, B2M, B3GNT5, BANK1, BATF, BAX, BCL11A, BCL2A1, BCL2L11, BCL3, BIRC3, BIRC5, BLNK, BMP4, BRCA1, BTG1, BTK, C10orf54, C3, C5AR1, CASP3, CASP8, CAV1, CBFB, CBS/CBSL, CCL2, Ccl2, CCL21, CCL4, CCL5, CCNA2, CCR6, CCR7, CD14, CD180, CD1D, CD2, CD209, CD22, CD226, CD244, CD247, Cd24a, CD27, CD276, CD28, C…	410		Hematological System Development and Function	binding	binding of leukocytes	1.8e-17	A2M, ADIPOQ, AOC3, APOE, BTLA, C3, CACNA1C, CCL19, CCL2, CCL21, CCL4, CCL5, CD14, CD2, CD3E, CD4, CD40, CD44, CD6, CD69, CD83, CD86, CD97, CHRNB2, CLEC4M, Cmah, CNR2, CXCL10, CXCL11, CXCL2, CXCR1, CXCR3, CXCR4, DOCK8, FASLG, FCGR1A, FCGR2A, FCGR2B, FCGR3A/FCGR3B, FERMT3, FGF1, FGR, FUT4, FUT7, FYB, HCK, HGF, ICAM1, ICOS, IL1A, Ins1, ITGA4, ITGA6, ITGAL, ITGAM, ITGB2, ITGB7, ITK, LCK, LCP2, LFNG, …	80		Hematological System Development and Function	development	development of hematopoietic progenitor cells	1.71e-13	ADAM17, ADAR, ALOX15, BBC3, BCL11B, BCL2L11, BIRC5, BLNK, BTK, CBFB, CCR9, CD3D, CD3E, CD3G, CD74, CD83, CDKN2A, CSF3R, CXCR4, DKK1, EGR2, EIF2AK2, FLT3, HTR4, ICOS, IL10, IL2RB, IL2RG, IL7R, IRF1, JAK3, Klra4 (includes others), LAT, LAT2, LAX1, LCP2, LFNG, LYN, MLLT11, PDCD1, PIM1, PLCG2, PSTPIP2, PTPRC, RASGRP1, RASGRP4, RUNX1, SATB1, SIT1, SOCS1, SPI1, SPIB, SYK, THEMIS2, TNF, TNFSF11, TRAT1, …	63
Cellular Movement	homing	homing of leukocytes	3.67e-32	ACKR2, ACKR3, ADAM17, ADORA1, AIF1, ANXA1, AOC3, APOE, APP, AQP9, B4GALT1, BATF, C1QBP, C3, C5AR1, C5AR2, CAMK1D, CAMP, CAPG, CASR, CCL2, Ccl2, CCL20, CCL21, CCL22, CCL24, CCL3L3, CCL4, CCND1, CCR3, CCR4, CCR6, CCR7, CCR9, CD38, CD44, CD9, CDKN1A, CHST4, CKLF, CMKLR1, CNR2, CORO1A, CSF1R, CSF2RA, CSF3R, CST3, CTSE, CX3CR1, CXCL10, CXCL11, CXCL13, CXCL14, CXCL16, CXCL2, Cxcl3, CXCL3, CXCL6, CXCR2,…	207		Hematological System Development and Function	proliferation	proliferation of mononuclear leukocytes	5.25e-46	A2M, ABCG1, ACPP, ADA, ADIPOQ, AHR, AIF1, ANPEP, ANXA1, APOE, ARF6, ARG1, Art2b, ATM, B2M, B3GNT5, BANK1, BATF, BAX, BCL11A, BCL2A1, BCL2L11, BCL3, BIRC3, BIRC5, BLNK, BMP4, BRCA1, BTK, C10orf54, C3, C5AR1, CASP3, CASP8, CAV1, CBFB, CBS/CBSL, Ccl2, CCL2, CCL21, CCL4, CCL5, CCR6, CCR7, CD14, CD180, CD1D, CD2, CD209, CD22, CD226, CD244, CD247, Cd24a, CD27, CD276, CD28, CD300A, CD300C, CD37, CD38, C…	384		Hematological System Development and Function	binding	binding of professional phagocytic cells	1.88e-14	A2M, ADIPOQ, APOE, C3, CACNA1C, CCL2, CCL5, CD14, CD2, CD4, CD40, CD69, CD83, CLEC4M, Cmah, CNR2, CXCL10, CXCL2, CXCR1, CXCR4, FASLG, FCGR1A, FCGR2A, FCGR3A/FCGR3B, FERMT3, FGF1, FGR, FUT4, FUT7, HCK, ICAM1, IL1A, Ins1, ITGA4, ITGA6, ITGAL, ITGAM, ITGB2, LIPG, LSP1, LYN, MSR1, PF4, PTPN6, PTPRC, S100A9, SELE, SELL, SELP, SELPLG, TNF, TNFSF11, TRPV2	53		Hematological System Development and Function	accumulation	accumulation of leukocytes	1.25e-31	ACKR2, ADGRE5, ADIPOQ, AGT, AHR, ANXA1, APOE, BCL2A1, BCL2L11, C4A/C4B, C5AR1, C6, CASP8, CCL17, CCL2, Ccl2, CCL21, CCL3L3, CCL5, Ccl7, CCR7, CD1D, CD27, CD274, CD28, CD40, CD44, CD80, CD86, COL18A1, CRYAB, CTSC, CX3CR1, CXCL10, Cxcl9, CXCR3, CXCR4, CYBB, DDR1, DLX3, DOCK8, EDN1, EPHA4, FCGR2A, FCGR3A/FCGR3B, FGF1, GRN, HAVCR2, HMOX1, ICAM1, ICOS, IL10, IL10RA, IL12B, IL17RA, IL18, IL1B, IL1R1, I…	112
Cellular Movement	homing	homing of neutrophils	2.44e-18	ADORA1, APP, AQP9, C1QBP, C3, C5AR1, C5AR2, CAMK1D, CAMP, CAPG, Ccl2, CCL2, CCL21, CCL24, CCL3L3, CCL4, CCR6, CCR7, CKLF, CORO1A, CSF2RA, CSF3R, CST3, CXCL10, CXCL14, CXCL2, CXCL3, Cxcl3, CXCL6, CXCR2, FCER1G, FCGR2A, FGR, FPR1, GRK6, GRN, GSN, HCK, ICAM1, IL18, IL1B, IL1R1, IL33, INPP5D, ITGA1, ITGA4, ITGAM, ITGB2, LGALS3, LSP1, LTB4R, LYN, MAPKAPK2, MDK, MYO1F, NCKAP1L, NLRP12, NOD2, NPR1, PDE4…	93		Hematological System Development and Function	proliferation	proliferation of lymphocytes	2.61e-45	A2M, ABCG1, ACPP, ADA, ADIPOQ, AHR, AIF1, ANXA1, APOE, ARF6, ARG1, Art2b, ATM, B2M, B3GNT5, BANK1, BATF, BAX, BCL11A, BCL2A1, BCL2L11, BCL3, BIRC3, BIRC5, BLNK, BMP4, BRCA1, BTK, C10orf54, C3, C5AR1, CASP3, CASP8, CAV1, CBFB, CBS/CBSL, Ccl2, CCL2, CCL21, CCL4, CCL5, CCR6, CCR7, CD14, CD180, CD1D, CD2, CD209, CD22, CD226, CD244, CD247, Cd24a, CD27, CD276, CD28, CD300A, CD300C, CD37, CD38, CD3E, CD…	378		Hematological System Development and Function	binding	binding of mononuclear leukocytes	6.35e-12	AOC3, BTLA, CCL19, CCL2, CCL21, CCL4, CCL5, CD2, CD3E, CD4, CD40, CD44, CD6, CD69, CD86, Cmah, CXCL10, CXCL11, CXCR3, CXCR4, DOCK8, FASLG, FCGR3A/FCGR3B, FGF1, FUT7, FYB, HGF, ICAM1, ICOS, IL1A, ITGA4, ITGAL, ITGAM, ITGB2, ITGB7, ITK, LCK, LCP2, LFNG, LIPG, NPY, NT5E, SELE, SELL, SELPLG, TNC, TNF, TNFSF11, TXK	49		Hematological System Development and Function	accumulation	accumulation of blood cells	4.55e-31	ACKR2, ADGRE5, ADIPOQ, AGT, AHR, ANXA1, APOE, BCL2A1, BCL2L11, C4A/C4B, C5AR1, C6, CASP8, CCL17, Ccl2, CCL2, CCL21, CCL3L3, CCL5, Ccl7, CCR7, CD1D, CD27, CD274, CD28, CD40, CD44, CD80, CD86, COL18A1, CRYAB, CTSC, CX3CR1, CXCL10, Cxcl9, CXCR3, CXCR4, CYBB, DDR1, DLX3, DOCK8, EDN1, EPHA4, FCGR2A, FCGR3A/FCGR3B, FGF1, GRN, HAVCR2, HMOX1, ICAM1, ICOS, IL10, IL10RA, IL12B, IL17RA, IL18, IL1B, IL1R1, I…	114
Cellular Movement	homing	homing of granulocytes	2.21e-17	ADORA1, ANXA1, APP, AQP9, C1QBP, C3, C5AR1, C5AR2, CAMK1D, CAMP, CAPG, Ccl2, CCL2, CCL21, CCL24, CCL3L3, CCL4, CCR3, CCR6, CCR7, CKLF, CORO1A, CSF2RA, CSF3R, CST3, CXCL10, CXCL14, CXCL2, Cxcl3, CXCL3, CXCL6, CXCR2, CXCR3, FCER1G, FCGR2A, FGR, FPR1, GRK6, GRN, GSN, HCK, ICAM1, IL10, IL18, IL1B, IL1R1, IL33, INPP5D, ITGA1, ITGA4, ITGAM, ITGB2, LGALS1, LGALS3, LSP1, LTB4R, LYN, MAPKAPK2, MDK, MYO1F,…	103		Hematological System Development and Function	proliferation	proliferation of T lymphocytes	1.89e-35	A2M, ABCG1, ACPP, AHR, AIF1, ANXA1, APOE, ARF6, ARG1, Art2b, ATM, B2M, BATF, BAX, BIRC3, BIRC5, BMP4, BRCA1, C10orf54, C3, C5AR1, CASP3, CASP8, CAV1, CBFB, CBS/CBSL, CCL2, Ccl2, CCL21, CCL4, CCL5, CCR6, CCR7, CD14, CD1D, CD2, CD209, CD226, CD244, CD247, Cd24a, CD27, CD276, CD28, CD37, CD38, CD3E, CD3G, CD4, CD40, CD44, CD5, CD55, CD6, CD69, CD80, CD83, CD84, CD86, CD8A, CDC25A, CDK2, CDKN1A, CDKN…	305		Hematological System Development and Function	binding	binding of lymphocytes	1.38e-11	AOC3, BTLA, CCL19, CCL21, CCL4, CCL5, CD2, CD3E, CD40, CD44, CD6, CD69, CD86, Cmah, CXCL10, CXCL11, CXCR3, CXCR4, DOCK8, FASLG, FCGR3A/FCGR3B, FUT7, FYB, HGF, ICAM1, ICOS, ITGA4, ITGAL, ITGB2, ITGB7, ITK, LCK, LCP2, LFNG, NPY, NT5E, SELL, SELPLG, TNC, TNF, TNFSF11, TXK	42		Hematological System Development and Function	accumulation	accumulation of myeloid cells	9.12e-21	ADGRE5, ADIPOQ, AGT, AHR, ANXA1, APOE, BCL2A1, C5AR1, C6, CCL17, CCL2, Ccl2, CCL5, Ccl7, CD28, CD40, CD44, COL18A1, CRYAB, CTSC, CX3CR1, CXCL10, Cxcl9, DDR1, EDN1, FCGR2A, FCGR3A/FCGR3B, FGF1, GRN, HAVCR2, HMOX1, IL10, IL12B, IL17RA, IL18, IL1B, IL1R1, IL1RN, INPP5D, IRF1, ITGA4, ITGAM, ITGB2, JAK2, MAPK13, MAPK3, MMP3, MMP7, MMP8, MMP9, NCF1, NOS2, NR4A1, NT5E, OSM, P2RY2, POSTN, RET, S100A8, S1…	71
Cellular Movement	homing	homing of mononuclear leukocytes	3.87e-15	ACKR2, ACKR3, ADAM17, AIF1, ANXA1, AOC3, BATF, CAMP, CASR, Ccl2, CCL2, CCL20, CCL21, CCL22, CCL24, CCL4, CCR3, CCR4, CCR6, CCR7, CCR9, CD44, CHST4, CKLF, CNR2, CXCL10, CXCL11, CXCL13, CXCL16, CXCL3, CXCR3, CXCR4, CYSLTR1, DIAPH1, DPP4, ELN, ENPP2, F2R, FOXO1, FOXP3, FPR1, FUT7, FYB, GATA3, GNA13, GNAO1, GNAZ, HEBP1, HLA-G, HP, HSPD1, IL10, IL16, IL1B, INHBA, ITGA4, ITGAL, ITGB7, JAK2, JAK3, LAT, …	103		Hematological System Development and Function	proliferation	proliferation of B lymphocytes	3.36e-18	ADA, ATM, B3GNT5, BANK1, BCL11A, BCL2A1, BCL2L11, BCL3, BLNK, BTK, CASP3, CASP8, CD14, CD180, CD22, CD244, Cd24a, CD300A, CD300C, CD38, CD3E, CD4, CD40, CD44, CD72, CD80, CD86, CD8A, CDKN1A, CDKN1B, CDKN2A, CDKN2C, CHRNA1, CHRNB2, CLCF1, Cmah, CR2, CTLA4, DAPP1, DCLRE1C, DOK1, EGR2, EXTL1, EZR, FADD, FCGR2B, FCGR3A/FCGR3B, FLT3, GAPT, HCK, HIF1A, HRH1, HSH2D, IFNAR1, IKZF3, IL10, IL13RA1, IL18, I…	142		Hematological System Development and Function	morphology	morphology of T lymphocytes	5.31e-17	ABCB1, Abcb1b, BCL11A, BCL11B, CCR6, CCR9, CD247, CD28, CD3E, CD4, CD5, CD5L, CD8A, CD8B, CDKN1A, CXCL11, CYTIP, EBI3, FASLG, FCER1G, FCGR2B, HLA-A, HLA-G, IL18, IL1RN, IL2RB, IL2RG, IL6, IL7R, INPP5D, IRF1, ITK, ITPKB, JAK3, LAT, LCK, LCP2, LGALS3, LY9, LYST, MPZ, NFKBIZ, PRKCQ, PSMB10, PSMB9, PTPN22, PTPRC, RASGRP1, RCAN2, RHOH, RUNX3, SASH3, SERPINB9, SLA, SLCO1A2, SPI1, TAP1, TBX21, TNF, VAV1…	61		Hematological System Development and Function	accumulation	accumulation of lymphocytes	2.45e-18	ACKR2, ADIPOQ, AGT, APOE, BCL2L11, C4A/C4B, CASP8, CCL17, CCL2, Ccl2, CCL21, CCL3L3, CCL5, CCR7, CD1D, CD27, CD274, CD28, CD40, CD80, CD86, CX3CR1, CXCL10, CXCR3, CXCR4, DLX3, EPHA4, ICAM1, ICOS, IL10RA, IL12B, IL17RA, IL21R, IL2RG, ITGAL, ITGB2, LAT, MLLT11, NT5E, PRKCQ, PTPN1, RASGRP1, RGS16, RIPK3, SELE, SELL, SH2D2A, SH3BP2, SPPL2A, TLR9, TNF, TNFAIP8L2, TNFRSF8, TNFSF13, Tnfsf9	55
Cellular Movement	chemotaxis	chemotaxis	7.49e-32	ACKR2, ACKR3, ADAM17, ADORA1, ADRBK1, AGT, AIF1, AIMP1, ANXA1, ANXA2, APLN, APOE, APP, AQP9, ARRB2, B4GALT1, BIN2, BMP2, BMP4, C1QBP, C3, C4A/C4B, C5AR1, C5AR2, CAMK1D, CAMP, CAPG, CASR, CCL2, Ccl2, CCL20, CCL21, CCL22, CCL24, CCL3L3, CCL4, Ccl6, Ccl9, CCND1, CCR3, CCR4, CCR6, CCR7, CCR9, CD38, CD44, CD9, CDKN1A, CEACAM1, CKLF, CLCN3, CMKLR1, CNR2, COL4A3, CORO1A, CSF1R, CSF2RA, CSF3R, CSK, CST3,…	276		Hematological System Development and Function	activation	activation of leukocytes	1.05e-46	ACE, ADA, ADIPOQ, ADORA1, ADRBK1, AGT, AHR, ANGPT1, ANXA1, ANXA2, APOE, ARRB2, ATF3, ATM, B2M, BANK1, BAX, BCL11B, BCL2L11, BCL3, BDNF, BID, BLNK, BTK, C1QA, C3, C4A/C4B, C5AR1, C6, CAMK4, CARD9, CASP1, CASP8, CCL17, CCL2, Ccl2, CCL21, CCL22, CCL4, CCL5, CCR7, CD14, CD180, CD1D, CD2, CD209, CD22, CD226, CD244, CD247, Cd24a, CD27, CD276, CD28, CD300A, CD300LB, CD300LD, CD300LF, CD37, CD38, CD3D, C…	371		Hematological System Development and Function	cell rolling	cell rolling of leukocytes	6.3e-17	ADAM17, ANXA1, AOC3, BDKRB1, BTK, CCL17, CCL2, CCR7, CD14, CD44, CD63, CHST1, CXCL2, CXCL3, CXCR1, F2RL1, FCGR2A, FCGR3A/FCGR3B, FGR, FUT4, FUT7, FYB, HCK, ICAM1, IL1B, ITGA4, ITGAL, ITGAM, ITGB2, ITGB7, LCP2, LGALS3, LYN, PRDX1, PREX1, PRKCQ, RAC2, SELE, SELL, SELP, SELPLG, SPN, TNF, TPH1	44		Hematological System Development and Function	accumulation	accumulation of granulocytes	3.42e-18	ADGRE5, ADIPOQ, AGT, AHR, ANXA1, BCL2A1, C5AR1, CCL17, CCL2, Ccl2, CCL5, Ccl7, CTSC, CXCL10, Cxcl9, EDN1, FCGR2A, FCGR3A/FCGR3B, GRN, HAVCR2, IL10, IL17RA, IL18, IL1B, IL1R1, IL1RN, INPP5D, ITGA4, ITGAM, ITGB2, MAPK13, MAPK3, MMP7, MMP8, MMP9, NCF1, NOS2, OSM, P2RY2, POSTN, S100A8, S100A9, SELL, SELP, SELPLG, Slpi (includes others), TLR3, TLR4, TNF	49
Cellular Movement	chemotaxis	chemotaxis of cells	6.31e-30	ACKR2, ACKR3, ADAM17, ADORA1, ADRBK1, AGT, AIF1, ANXA1, ANXA2, APLN, APOE, APP, AQP9, ARRB2, B4GALT1, BIN2, BMP2, BMP4, C1QBP, C3, C4A/C4B, C5AR1, C5AR2, CAMK1D, CAMP, CAPG, CASR, CCL2, Ccl2, CCL20, CCL21, CCL22, CCL24, CCL3L3, CCL4, Ccl6, Ccl9, CCND1, CCR3, CCR4, CCR6, CCR7, CCR9, CD38, CD44, CD9, CDKN1A, CEACAM1, CKLF, CLCN3, CMKLR1, CNR2, COL4A3, CORO1A, CSF1R, CSF2RA, CSF3R, CSK, CST3, CTSE, …	264		Hematological System Development and Function	activation	activation of blood cells	3.5e-46	ACE, ADA, ADIPOQ, ADORA1, ADRBK1, AGT, AHR, ANGPT1, ANXA1, ANXA2, APOE, ARRB2, ATF3, ATM, B2M, BANK1, BAX, BCL11B, BCL2L11, BCL3, BDNF, BID, BLNK, BTK, C1QA, C1QTNF1, C3, C4A/C4B, C5AR1, C6, CAMK4, CARD9, CASP1, CASP8, CCL17, CCL2, Ccl2, CCL21, CCL22, CCL4, CCL5, CCR7, CD14, CD180, CD1D, CD2, CD209, CD22, CD226, CD244, CD247, Cd24a, CD27, CD276, CD28, CD300A, CD300LB, CD300LD, CD300LF, CD37, CD38…	390		Hematological System Development and Function	interaction	interaction of leukocytes	4.03e-15	BTLA, CCL21, CCL4, CCL5, CCR7, CD14, CD2, CD28, CD4, CD40, CD44, CD6, CD69, CD80, CD86, CLEC4M, Cmah, CXCL10, CXCL11, CXCR3, CXCR4, EZR, FASLG, FUT7, FYB, ICAM1, ICOS, IL17RA, ITGA4, ITGAL, ITGB2, ITK, LCK, LCP2, LFNG, LIF, LTK, NPY, NRP1, PLCB1, RHBDD3, SELP, SELPLG, SKAP1, SPN, TLR2, TNC, TNFRSF8, TNFSF11, TXK	50		Hematological System Development and Function	accumulation	accumulation of phagocytes	7.7e-18	AGT, AHR, ANXA1, APOE, C5AR1, C6, CCL2, Ccl2, CCL21, CCL5, CD28, CD40, CD44, COL18A1, CTSC, CX3CR1, CXCL10, DDR1, DOCK8, EDN1, FCGR2A, FCGR3A/FCGR3B, FGF1, GRN, HAVCR2, HMOX1, IL10, IL12B, IL17RA, IL18, IL1B, IL1R1, IL1RN, INPP5D, IRF1, ITGA4, ITGAM, ITGB2, MAPK13, MMP3, MMP7, MMP9, NOS2, NR4A1, NT5E, S100A8, S100A9, SELP, SELPLG, Slpi (includes others), SPP1, STAT1, THBS1, TLR4, TNF, TNFAIP8L2, …	58
Cellular Movement	chemotaxis	chemotaxis of leukocytes	4.27e-28	ACKR2, ACKR3, ADAM17, ADORA1, AIF1, ANXA1, APOE, APP, AQP9, B4GALT1, C1QBP, C3, C5AR1, C5AR2, CAMK1D, CAMP, CAPG, CASR, Ccl2, CCL2, CCL20, CCL21, CCL22, CCL24, CCL3L3, CCL4, CCND1, CCR3, CCR4, CCR6, CCR7, CD38, CD9, CDKN1A, CKLF, CMKLR1, CORO1A, CSF1R, CSF2RA, CSF3R, CST3, CTSE, CX3CR1, CXCL10, CXCL11, CXCL13, CXCL14, CXCL16, CXCL2, Cxcl3, CXCL3, CXCL6, CXCR2, CXCR3, CXCR4, CYBB, CYSLTR1, DIAPH1,…	189		Hematological System Development and Function	activation	activation of mononuclear leukocytes	7.28e-33	ADA, ADIPOQ, AHR, ANXA1, APOE, ARRB2, B2M, BANK1, BAX, BCL11B, BCL2L11, BCL3, BLNK, BTK, C1QA, C3, C4A/C4B, CAMK4, CASP8, Ccl2, CCL2, CCL22, CCL4, CCL5, CCR7, CD14, CD180, CD1D, CD2, CD209, CD22, CD226, CD244, CD247, Cd24a, CD27, CD276, CD28, CD38, CD3D, CD3E, CD3G, CD4, CD40, CD44, CD5, CD55, CD6, CD69, CD7, CD72, CD80, CD83, CD86, CD8A, CDKN1A, CHRNB2, CISH, CLEC5A, CLEC7A, Cmah, CNR1, CORO1A, …	252		Hematological System Development and Function	interaction	interaction of mononuclear leukocytes	8.01e-15	BTLA, CCL21, CCL4, CCL5, CCR7, CD14, CD2, CD28, CD4, CD40, CD44, CD6, CD69, CD80, CD86, CLEC4M, Cmah, CXCL10, CXCL11, CXCR3, CXCR4, EZR, FASLG, FUT7, FYB, ICAM1, ICOS, IL17RA, ITGA4, ITGAL, ITGB2, ITK, LCK, LCP2, LFNG, LIF, LTK, NPY, NRP1, PLCB1, RHBDD3, SELPLG, SKAP1, SPN, TLR2, TNC, TNFRSF8, TNFSF11, TXK	49		Hematological System Development and Function	accumulation	accumulation of mononuclear leukocytes	1.29e-17	ACKR2, ADIPOQ, AGT, APOE, BCL2L11, C4A/C4B, CASP8, CCL17, CCL2, Ccl2, CCL21, CCL3L3, CCL5, CCR7, CD1D, CD27, CD274, CD28, CD40, CD80, CD86, CX3CR1, CXCL10, CXCR3, CXCR4, DLX3, EDN1, EPHA4, ICAM1, ICOS, IL10RA, IL12B, IL17RA, IL18, IL21R, IL2RG, ITGAL, ITGB2, LAT, MLLT11, NT5E, PRKCQ, PTPN1, RASGRP1, RGS16, RIPK3, SELE, SELL, SH2D2A, SH3BP2, SPPL2A, TLR9, TNF, TNFAIP8L2, TNFRSF8, TNFSF13, Tnfsf9	57
Cellular Movement	chemotaxis	chemotaxis of myeloid cells	1.75e-26	ADORA1, AIF1, ANXA1, APOE, APP, AQP9, B4GALT1, C1QBP, C3, C5AR1, C5AR2, CAMK1D, CAMP, CAPG, CASR, Ccl2, CCL2, CCL20, CCL21, CCL22, CCL24, CCL3L3, CCL4, CCND1, CCR3, CCR6, CCR7, CD9, CDKN1A, CKLF, CMKLR1, CORO1A, CSF1R, CSF2RA, CSF3R, CST3, CTSE, CX3CR1, CXCL10, CXCL14, CXCL2, Cxcl3, CXCL3, CXCL6, CXCR2, CXCR3, CXCR4, CYBB, EDNRB, ELN, F2R, FCER1G, FCGR2A, FGR, FPR1, GLRB, GRK6, GRN, GSN, HCAR2, H…	160		Hematological System Development and Function	activation	activation of lymphocytes	2.57e-32	ADA, ADIPOQ, AHR, ANXA1, APOE, B2M, BANK1, BAX, BCL11B, BCL2L11, BCL3, BLNK, BTK, C1QA, C3, C4A/C4B, CAMK4, CASP8, CCL2, Ccl2, CCL22, CCL4, CCL5, CCR7, CD180, CD1D, CD2, CD209, CD22, CD226, CD244, CD247, Cd24a, CD27, CD276, CD28, CD38, CD3D, CD3E, CD3G, CD4, CD40, CD44, CD5, CD55, CD6, CD69, CD7, CD72, CD80, CD83, CD86, CD8A, CDKN1A, CHRNB2, CISH, CLEC7A, Cmah, CNR1, CORO1A, CR2, CSF2RB, CTLA4, C…	242		Hematological System Development and Function	interaction	interaction of lymphocytes	2.55e-14	BTLA, CCL21, CCL4, CCL5, CCR7, CD2, CD28, CD4, CD40, CD44, CD6, CD69, CD80, CD86, CLEC4M, Cmah, CXCL10, CXCL11, CXCR3, CXCR4, EZR, FASLG, FUT7, FYB, ICAM1, ICOS, IL17RA, ITGA4, ITGAL, ITGB2, ITK, LCK, LCP2, LFNG, LIF, LTK, NPY, NRP1, PLCB1, RHBDD3, SELPLG, SKAP1, SPN, TLR2, TNC, TNFRSF8, TNFSF11, TXK	48		Hematological System Development and Function	homeostasis	T cell homeostasis	1.89e-31	ADA, ADAM17, AHR, ANXA1, ATM, BATF, BBC3, BCL11B, BCL2A1, BCL2L11, BIRC5, BMF, C5AR1, CADM1, CASP1, CASP8, CBFB, CCL19, CCR7, CCR9, CD1D, CD2, CD226, CD244, CD247, CD274, CD28, CD3D, CD3E, CD3G, CD4, CD5, CD6, CD69, CD74, CD80, CD83, CD86, CD8A, CD8B, CDKN2A, CISH, CNR2, CORO1A, CXCR4, DCLRE1C, DKK1, DNASE2, DNTT, DOK1, DOK2, EGR2, EPHA4, FCER1G, FCGR2A, FCGR2B, HAVCR2, HLA-DOA, HLA-DQA1, HLA-DQB…	180
Cellular Movement	chemotaxis	chemotaxis of phagocytes	5.73e-26	ADORA1, AIF1, ANXA1, APOE, APP, AQP9, B4GALT1, C1QBP, C3, C5AR1, C5AR2, CAMK1D, CAMP, CAPG, CASR, Ccl2, CCL2, CCL20, CCL21, CCL22, CCL24, CCL3L3, CCL4, CCND1, CCR3, CCR6, CCR7, CD38, CD9, CDKN1A, CKLF, CMKLR1, CORO1A, CSF1R, CSF2RA, CSF3R, CST3, CTSE, CX3CR1, CXCL10, CXCL14, CXCL2, Cxcl3, CXCL3, CXCL6, CXCR2, CXCR3, CXCR4, CYBB, EDNRB, ELN, F2R, FCER1G, FCGR2A, FGR, FPR1, GLRB, GRK6, GRN, GSN, HC…	160		Hematological System Development and Function	activation	activation of phagocytes	6.95e-28	ACE, ADIPOQ, ADORA1, ADRBK1, AGT, AHR, ANGPT1, ANXA1, ANXA2, APOE, ARRB2, ATF3, ATM, BDNF, BID, BTK, C3, C4A/C4B, C5AR1, C6, CARD9, CASP1, CCL17, Ccl2, CCL2, CCL21, CCL22, CCL4, CCL5, CCR7, CD14, CD1D, CD209, CD226, Cd24a, CD300A, CD300LB, CD300LD, CD300LF, CD37, CD4, CD40, CD44, CD63, CD80, CD86, CEBPE, CERK, CFH, CHGA, CLCN7, CLEC4E, CLEC4M, CLEC5A, CLEC7A, CNR1, CNR2, CRYAA/LOC102724652, CSF1R…	192		Hematological System Development and Function	interaction	interaction of T lymphocytes	1.52e-12	BTLA, CCL21, CCL4, CCL5, CCR7, CD2, CD28, CD4, CD40, CD6, CD69, CD80, CD86, Cmah, CXCL10, CXCL11, CXCR3, CXCR4, EZR, FASLG, FUT7, FYB, ICAM1, ICOS, IL17RA, ITGA4, ITGAL, ITGB2, ITK, LCK, LCP2, LFNG, LTK, NPY, NRP1, PLCB1, SELPLG, SKAP1, SPN, TLR2, TNC, TNFRSF8, TNFSF11, TXK	44		Hematological System Development and Function	response	response of lymphocytes	1.23e-28	ADA, AHR, BCL2L11, C5AR1, CASP1, CCL19, CCL2, Ccl2, CCL21, CCR6, CD180, CD1D, CD200R1, CD274, CD28, CD3E, CD4, CD40, CD6, CD80, CD83, CD86, CD8A, CH25H, CLEC7A, CTSS, CXCL11, CYP7B1, DAPP1, DOCK8, EBI3, FCGR2A, FCGR2B, GZMB, HAVCR2, HLA-DQB1, HMOX1, ICAM1, ICOS, IL10, IL10RA, IL12B, IL12RB2, IL18, IL1B, IL1R1, IL21R, IL7R, ITK, Klra4 (includes others), KLRB1, LAG3, LAX1, LCP2, LIF, LTB, LYN, MSR1…	88
Cellular Movement	chemotaxis	chemotaxis of neutrophils	5.86e-18	ADORA1, APP, AQP9, C1QBP, C3, C5AR1, C5AR2, CAMK1D, CAMP, CAPG, Ccl2, CCL2, CCL21, CCL24, CCL3L3, CCL4, CCR6, CCR7, CKLF, CORO1A, CSF2RA, CSF3R, CST3, CXCL10, CXCL14, CXCL2, CXCL3, Cxcl3, CXCL6, CXCR2, FCER1G, FCGR2A, FGR, FPR1, GRK6, GRN, GSN, HCK, ICAM1, IL18, IL1B, IL1R1, IL33, INPP5D, ITGA1, ITGA4, ITGAM, ITGB2, LGALS3, LSP1, LTB4R, LYN, MAPKAPK2, MDK, MYO1F, NCKAP1L, NLRP12, NOD2, NPR1, PDE4…	92		Hematological System Development and Function	activation	activation of myeloid cells	1.43e-26	ACE, ADIPOQ, ADORA1, ADRBK1, AGT, AHR, ANGPT1, ANXA1, ANXA2, APOE, ARRB2, ATF3, ATM, BDNF, BID, C3, C4A/C4B, C5AR1, C6, CASP1, CCL17, Ccl2, CCL2, CCL21, CCL22, CCL4, CCL5, CD14, CD1D, CD226, CD300A, CD300LB, CD300LD, CD300LF, CD4, CD40, CD44, CD63, CD80, CD86, CEBPE, CERK, CFH, CHGA, CLCN7, CLEC11A, CLEC4E, CLEC5A, CNR1, CNR2, CSF1R, CST3, CTF1, CX3CR1, CXCL10, CXCL3, CXCL6, CXCR5, CYBB, ELANE, F…	179		Hematological System Development and Function	abnormal quantity	abnormal quantity of leukocytes	4.43e-15	APOE, BCL2L11, BCL3, BIRC3, CCR6, CCR9, CD247, CD4, CD80, CD86, CD8A, CSF1R, CXCL10, DLK1, ENTPD7, ESR1, ESR2, FCGR2A, FES, HMOX1, ICOS, IL1RN, IL2RG, IL6, IRF1, IRF8, ITGAM, JAK3, LCK, MR1, NOS2, NPY1R, PRDX1, PTPN2, PTPRC, RHOH, SELE, SELL, SELP, SERPINB2, SH3BP2, SIGLEC1, SPI1, SYK, TAP1, VAV1, ZBTB7B	47		Hematological System Development and Function	response	T cell response	5.62e-23	ADA, AHR, C5AR1, CASP1, CCL19, CCL2, Ccl2, CCL21, CD1D, CD200R1, CD274, CD28, CD3E, CD4, CD6, CD80, CD86, CD8A, CLEC7A, CXCL11, DOCK8, EBI3, GZMB, HAVCR2, HLA-DQB1, HMOX1, ICAM1, ICOS, IL10, IL10RA, IL12B, IL12RB2, IL18, IL1B, IL1R1, IL21R, IL7R, ITK, LAG3, LAX1, LIF, LTB, NFIL3, NOS2, OASL, PDCD1, PLAUR, PON1, POSTN, PSMB10, PTPN6, PYCARD, RET, SELPLG, SEMA4A, SOCS1, SOCS3, STAT4, TBX21, THY1, T…	70
Cellular Movement	chemotaxis	chemotaxis of granulocytes	4.96e-17	ADORA1, ANXA1, APP, AQP9, C1QBP, C3, C5AR1, C5AR2, CAMK1D, CAMP, CAPG, Ccl2, CCL2, CCL21, CCL24, CCL3L3, CCL4, CCR3, CCR6, CCR7, CKLF, CORO1A, CSF2RA, CSF3R, CST3, CXCL10, CXCL14, CXCL2, Cxcl3, CXCL3, CXCL6, CXCR2, CXCR3, FCER1G, FCGR2A, FGR, FPR1, GRK6, GRN, GSN, HCK, ICAM1, IL10, IL18, IL1B, IL1R1, IL33, INPP5D, ITGA1, ITGA4, ITGAM, ITGB2, LGALS1, LGALS3, LSP1, LTB4R, LYN, MAPKAPK2, MDK, MYO1F,…	102		Hematological System Development and Function	activation	activation of T lymphocytes	6.62e-22	ADA, ANXA1, APOE, B2M, BAX, BCL11B, BCL2L11, BCL3, C3, CAMK4, CASP8, Ccl2, CCL2, CCL22, CCL4, CCL5, CD1D, CD2, CD209, CD226, CD244, CD247, Cd24a, CD27, CD276, CD28, CD38, CD3D, CD3E, CD3G, CD4, CD40, CD44, CD55, CD6, CD7, CD80, CD83, CD86, CD8A, CDKN1A, CISH, CLEC7A, CNR1, CORO1A, CSF2RB, CTLA4, CXCL10, DDR1, DEF6, DLL1, EGR2, FADD, FASLG, FCER1G, FGF1, FN1, FOS, FOXO1, GADD45A, GATA3, GZMA, HAVC…	176		Hematological System Development and Function	abnormal quantity	abnormal quantity of lymphocytes	1.46e-11	APOE, BCL2L11, CCR6, CCR9, CD247, CD4, CD80, CD86, CD8A, CXCL10, DLK1, ENTPD7, ESR1, ESR2, ICOS, IL2RG, IL6, IRF1, IRF8, ITGAM, JAK3, LCK, MR1, NPY1R, PRDX1, PTPN2, PTPRC, RHOH, SELL, SH3BP2, SIGLEC1, SPI1, SYK, TAP1, VAV1, ZBTB7B	36		Hematological System Development and Function	binding	binding of leukocytes	1.25e-26	ADGRE5, ADIPOQ, ALOX15, APOE, B4GALT1, BTLA, C3, CACNA1C, CCL19, CCL2, CCL21, CCL4, CCL5, CD14, CD2, CD3E, CD4, CD40, CD44, CD6, CD69, CD83, CD86, CLEC4M, Cmah, CNR2, CXCL10, CXCL11, CXCL13, CXCR1, CXCR3, CXCR4, DOCK8, FCGR1A, FCGR2A, FCGR2B, FCGR3A/FCGR3B, FERMT3, FGF1, FGR, FUT7, FYB, HCK, HGF, ICAM1, ICOS, IL10, IL18R1, IL1A, ITGA4, ITGAD, ITGAL, ITGAM, ITGB2, ITGB7, ITK, LCK, LCP2, LFNG, LIPG…	82
Cellular Movement	infiltration	infiltration	2.06e-28	ABCB4, ADA, ADAM17, ADIPOQ, ADRB3, ADRBK1, AGT, ALOX5AP, ANXA1, APOE, APP, ARG1, ARRB2, B4GALT1, BGN, BID, C2, C3, C4A/C4B, CASP1, CAV3, CBFB, CCL2, Ccl2, CCL21, CCL22, CCL3L3, CCL4, CCR6, CCR7, CD14, CD2, CD274, CD40, CD44, CD80, CD86, CD93, CES1, CFB, CFH, CIITA, CLEC5A, CMKLR1, CNP, CNR2, COL2A1, COL4A3, CSF1R, CSF2RB, CTSB, CXCL10, CXCL16, CXCL2, CXCL3, CXCR2, CYBB, CYSLTR1, DCN, EEF1A2, ESR1…	216		Hematological System Development and Function	activation	activation of antigen presenting cells	3.02e-18	ACE, ADIPOQ, ADORA1, ADRBK1, AGT, AHR, ANGPT1, ANXA2, APOE, ATF3, ATM, BDNF, BID, BTK, C3, C6, CARD9, CASP1, CCL2, Ccl2, CCL21, CCL22, CCL4, CCL5, CCR7, CD14, CD1D, CD209, Cd24a, CD37, CD4, CD40, CD44, CD80, CD86, CEBPE, CHGA, CLCN7, CLEC4E, CLEC4M, CLEC7A, CNR2, CRYAA/LOC102724652, CSF1R, CTSS, CX3CR1, CXCL10, CXCR5, CYBB, ERAP1, F2RL1, FASLG, FCER1G, FCGR1A, FCGR2A, FN1, GDNF, GJA1, GJB1, Gm215…	149		Hematological System Development and Function	abnormal morphology	abnormal morphology of T lymphocytes	8.48e-14	ABCB1, Abcb1b, BCL11B, CCR6, CCR9, CD247, CD28, CD3E, CD4, CD5, CD5L, CD8A, CD8B, CDKN1A, CYTIP, EBI3, FASLG, FCER1G, FCGR2B, HLA-G, IL18, IL1RN, IL2RB, IL2RG, IL6, IRF1, ITK, JAK3, LAT, LCK, LCP2, LGALS3, LY9, NFKBIZ, PRKCQ, PSMB10, PSMB9, PTPN22, PTPRC, RASGRP1, RCAN2, RHOH, RUNX3, SASH3, SERPINB9, SLA, SLCO1A2, SPI1, TBX21, TNF, VAV1, WAS	52		Hematological System Development and Function	binding	binding of professional phagocytic cells	1.33e-20	ADIPOQ, ALOX15, APOE, B4GALT1, C3, CACNA1C, CCL2, CCL5, CD14, CD2, CD4, CD40, CD69, CD83, CLEC4M, Cmah, CNR2, CXCL10, CXCR1, CXCR4, FCGR1A, FCGR2A, FCGR3A/FCGR3B, FERMT3, FGF1, FGR, FUT7, HCK, ICAM1, IL10, IL1A, ITGA4, ITGAL, ITGAM, ITGB2, LIPG, LSP1, LYN, MSR1, PF4, PTPN6, PTPRC, S100A9, SCARB1, SELE, SELL, SELP, SELPLG, SFTPA1, TLR4, TNF, TNFSF11, TNR, TRPV2	54
Cellular Movement	infiltration	infiltration of cells	6.92e-28	ABCB4, ADA, ADAM17, ADIPOQ, ADRB3, ADRBK1, AGT, ALOX5AP, ANXA1, APOE, APP, ARG1, ARRB2, B4GALT1, BGN, BID, C2, C3, C4A/C4B, CASP1, CAV3, CBFB, CCL2, Ccl2, CCL21, CCL22, CCL3L3, CCL4, CCR6, CCR7, CD14, CD2, CD274, CD40, CD44, CD80, CD86, CD93, CES1, CFB, CFH, CIITA, CLEC5A, CMKLR1, CNP, CNR2, COL2A1, COL4A3, CSF1R, CSF2RB, CTSB, CXCL10, CXCL16, CXCL2, CXCL3, CXCR2, CYBB, CYSLTR1, DCN, EEF1A2, ESR1…	213		Hematological System Development and Function	activation	activation of macrophages	3.43e-15	ACE, ADIPOQ, ADORA1, ADRBK1, AGT, AHR, ANGPT1, ANXA2, APOE, ATF3, ATM, BDNF, BID, C3, C6, CASP1, Ccl2, CCL2, CCL21, CCL22, CCL4, CCL5, CD14, CD1D, CD4, CD40, CD44, CEBPE, CHGA, CLCN7, CLEC4E, CNR2, CSF1R, CX3CR1, CXCL10, CXCR5, CYBB, F2RL1, FCER1G, FN1, GDNF, GJA1, GJB1, HAVCR2, HCK, HLA-A, HMOX1, HPSE, ICAM1, IL10, IL18, IL1B, IL1R1, IL1RL1, IL1RN, IL21, IL34, IL4R, IL6, INHBA, IRF6, JAK2, LBP, …	111		Hematological System Development and Function	expansion	expansion of leukocytes	9.09e-14	ABCB1, AHR, BCL3, BCL6, BTK, BTLA, C3, C5AR1, CASP8, CCR6, CCR7, CD180, CD2, CD244, CD27, CD28, CD3E, CD4, CD40, CD69, CD80, CD86, CSF1R, CTSD, CXCR3, DOK1, FCGR2B, FLT3, HAVCR2, HMOX1, ICOS, IL10RA, IL18, IL1B, IL21R, IL4R, IL6, IL7R, IRF1, ITK, JAK3, KLF2, Klrk1, LAG3, LCP1, LCP2, LEP, LEPR, LY9, LYN, MDK, MET, NOS1, PDCD1, PIK3CB, PIK3CD, PIM1, PRF1, PTPRC, RUNX1, SERPINB9, SHH, SIGLEC10, SNAI…	79		Hematological System Development and Function	binding	binding of mononuclear leukocytes	8.62e-20	ALOX15, B4GALT1, BTLA, CCL19, CCL2, CCL21, CCL4, CCL5, CD2, CD3E, CD4, CD40, CD44, CD6, CD69, CD86, Cmah, CXCL10, CXCL11, CXCL13, CXCR3, CXCR4, DOCK8, FCGR3A/FCGR3B, FGF1, FUT7, FYB, HGF, ICAM1, ICOS, IL10, IL18R1, IL1A, ITGA4, ITGAL, ITGAM, ITGB2, ITGB7, ITK, LCK, LCP2, LFNG, LIPG, NPY, NT5E, SCARB1, SELE, SELL, SELPLG, TNC, TNF, TNFSF11, TXK	53
Cellular Movement	infiltration	infiltration of leukocytes	6.97e-28	ABCB4, ADA, ADAM17, ADIPOQ, ADRB3, ADRBK1, AGT, ALOX5AP, ANXA1, APOE, APP, ARG1, ARRB2, B4GALT1, BGN, BID, C2, C3, C4A/C4B, CASP1, CBFB, CCL2, Ccl2, CCL21, CCL22, CCL3L3, CCL4, CCR6, CCR7, CD14, CD2, CD274, CD44, CD80, CD86, CD93, CES1, CFB, CFH, CIITA, CLEC5A, CMKLR1, CNP, CNR2, COL4A3, CSF1R, CTSB, CXCL10, CXCL16, CXCL2, CXCL3, CXCR2, CYBB, CYSLTR1, DCN, EEF1A2, ESR1, ESR2, F2R, F2RL1, FABP4, F…	204		Hematological System Development and Function	activation	activation of natural killer cells	3.77e-14	ADIPOQ, AHR, BTK, CASP8, CCL5, CD1D, CD2, CD226, CD244, CD27, CD28, CD4, CD40, CD44, CD69, CD86, FASLG, FCGR2A, FCGR3A/FCGR3B, FLT3, GJA1, HIF1A, HLA-G, HPS1, IL10, IL12A, IL18, IL18R1, IL1B, IL1RL1, IL1RN, IL21, IL2RB, IL6, IRAK4, IRF1, ITGAL, ITGB2, Klra4 (includes others), Klra5 (includes others), KLRB1, Klre1, Klrk1, LEP, LYST, MYD88, NCR1, NCR3, NFKBIZ, PIK3CD, PRF1, PRKCQ, RHBDD3, S100A9, S…	69		Hematological System Development and Function	expansion	expansion of T lymphocytes	3.47e-13	AHR, BTLA, C3, C5AR1, CASP8, CCR6, CCR7, CD2, CD244, CD27, CD28, CD3E, CD4, CD40, CD69, CD80, CD86, CTSD, CXCR3, DOK1, HAVCR2, ICOS, IL18, IL1B, IL21R, IL4R, IL6, IL7R, IRF1, ITK, JAK3, KLF2, Klrk1, LAG3, LCP1, LCP2, LEP, LEPR, LY9, MDK, NOS1, PDCD1, PIK3CB, PIK3CD, PIM1, PRF1, SERPINB9, SHH, SPI1, STAT4, SYK, TBX21, TGFBR1, Timd2, TLR2, TNF, TNFRSF18, TNFRSF1B, TNFSF15, Tnfsf9, ZAP70, ZBTB16	62		Hematological System Development and Function	binding	binding of lymphocytes	2.01e-17	BTLA, CCL19, CCL21, CCL4, CCL5, CD2, CD3E, CD40, CD44, CD6, CD69, CD86, Cmah, CXCL10, CXCL11, CXCL13, CXCR3, CXCR4, DOCK8, FCGR3A/FCGR3B, FUT7, FYB, HGF, ICAM1, ICOS, IL10, IL18R1, ITGA4, ITGAL, ITGB2, ITGB7, ITK, LCK, LCP2, LFNG, NPY, NT5E, SCARB1, SELL, SELPLG, TNC, TNF, TNFSF11, TXK	44
Cellular Movement	infiltration	infiltration of myeloid cells	1.28e-20	ADAM17, ADIPOQ, ADRB3, ADRBK1, AGT, ALOX5AP, ANXA1, APOE, ARRB2, B4GALT1, C2, C3, C4A/C4B, CASP1, CBFB, CCL21, CCL4, CCR7, CD14, CD2, CD44, CFB, CFH, CMKLR1, CTSB, CXCL10, CXCL2, CXCL3, CXCR2, F2R, F2RL1, FABP4, FAS, FCER1G, FPR1, FUT4, FUT7, GJB2, HCK, HGF, HIF1A, HMOX1, ICAM1, IKBKG, IL10, IL17RA, IL18, IL1A, IL1B, IL1R1, IL1RL1, IL1RN, IL2RB, IL33, IL4R, IL6, IL6R, ITGAL, ITGAM, ITGB2, JAK3, L…	116		Hematological System Development and Function	function	function of lymphocytes	5.12e-35	ABCB1, Abcb1b, ADGRE1, AHR, APOE, ARRB2, ATF3, ATM, B2M, BANK1, BATF3, BCL2L11, BCL3, BIRC3, BIRC5, BST1, BTK, CACNB3, Ccl2, CCR6, CCR7, CD22, CD244, CD247, CD27, CD276, CD28, CD3E, CD3G, CD4, CD40, CD44, CD69, CD72, CD80, CD84, CD86, CD8A, CD8B, CDKN2C, CEBPG, CIITA, Cmah, CNR2, CR2, CSF2RB, CTLA4, CTSC, CTSS, CX3CR1, CXCL10, CXCL13, CXCR4, EBI3, ECM1, ERAP1, FCER1G, FCGR2A, FYB, GATA2, GPR84, G…	197		Hematological System Development and Function	expansion	expansion of lymphocytes	1.02e-12	AHR, BCL3, BCL6, BTK, BTLA, C3, C5AR1, CASP8, CCR6, CCR7, CD180, CD2, CD244, CD27, CD28, CD3E, CD4, CD40, CD69, CD80, CD86, CTSD, CXCR3, DOK1, FCGR2B, HAVCR2, ICOS, IL18, IL1B, IL21R, IL4R, IL6, IL7R, IRF1, ITK, JAK3, KLF2, Klrk1, LAG3, LCP1, LCP2, LEP, LEPR, LY9, MDK, NOS1, PDCD1, PIK3CB, PIK3CD, PIM1, PRF1, PTPRC, SERPINB9, SHH, SIGLEC10, SPI1, STAT4, SYK, TBX21, TGFBR1, Timd2, TLR2, TNF, TNFRS…	69		Hematological System Development and Function	engulfment	engulfment of myeloid cells	3.36e-22	ABCA1, ALOX15, ANXA1, C3, CAPG, CD14, CD44, CH25H, CLCN3, CLEC4M, CORO1A, CXCL10, CYP2S1, FCER1G, FCGR1A, FCGR2A, FCGR2B, FCGR3A/FCGR3B, FCMR, FCN1, FGR, GLRX, GSN, HCK, HGF, HMOX1, IL12B, IL1A, IL1B, INPP5D, IRF8, ISG15, ITGAM, ITGB2, LCN2, LGALS3, MSR1, NOD2, PF4, PLA2G5, PLAUR, PTPRC, RAPGEF3, S100A9, SCARB1, SCN5A, SELPLG, SFTPA1, SIGLEC1, SIRPA, SPI1, SPIC, SYK, THBS1, TLR2, TLR3, TLR4, TNF,…	62
Cellular Movement	infiltration	infiltration of granulocytes	1.95e-20	ADAM17, ADIPOQ, ADRB3, ADRBK1, AGT, ALOX5AP, ANXA1, APOE, ARRB2, B4GALT1, C2, C3, C4A/C4B, CASP1, CBFB, CCL21, CCL4, CCR7, CD14, CD2, CD44, CFB, CFH, CMKLR1, CTSB, CXCL10, CXCL2, CXCL3, CXCR2, F2R, F2RL1, FABP4, FAS, FCER1G, FPR1, FUT4, FUT7, GJB2, HCK, HGF, HIF1A, HMOX1, ICAM1, IKBKG, IL10, IL17RA, IL18, IL1A, IL1B, IL1R1, IL1RL1, IL1RN, IL2RB, IL33, IL4R, IL6, IL6R, ITGAL, ITGAM, ITGB2, JAK3, L…	115		Hematological System Development and Function	function	function of myeloid cells	2.55e-29	ADIPOQ, AHR, ANPEP, APOE, ATM, B4GALT1, BCL2A1, BCL3, BIRC3, CAPG, CARD9, CASP8, CAV1, Ccl2, CCL2, CCL5, CCR3, CCR6, CD14, CD9, CEBPE, CLCN2, CLCN3, CLEC4E, CLEC7A, CNR2, CSF1R, CSF2RB, CXCL10, CXCL6, CYBB, DOK1, DOK2, ELANE, FCER1A, FCER1G, FCGR1A, FCGR2A, FCGR2B, FCMR, FES, FGR, FOS, FUT4, FUT7, GJA1, GPR68, GRN, GSN, HCK, HLA-G, HSPB1, ICAM1, IFNAR1, IL10, IL12A, IL18, IL1B, IL1R1, IL1RL1, IL2…	141		Hematological System Development and Function	expansion	expansion of mononuclear leukocytes	1.23e-12	AHR, BCL3, BCL6, BTK, BTLA, C3, C5AR1, CASP8, CCR6, CCR7, CD180, CD2, CD244, CD27, CD28, CD3E, CD4, CD40, CD69, CD80, CD86, CSF1R, CTSD, CXCR3, DOK1, FCGR2B, HAVCR2, ICOS, IL10RA, IL18, IL1B, IL21R, IL4R, IL6, IL7R, IRF1, ITK, JAK3, KLF2, Klrk1, LAG3, LCP1, LCP2, LEP, LEPR, LY9, MDK, NOS1, PDCD1, PIK3CB, PIK3CD, PIM1, PRF1, PTPRC, SERPINB9, SHH, SIGLEC10, SPI1, STAT4, SYK, TBX21, TGFBR1, Timd2, T…	71		Hematological System Development and Function	engulfment	engulfment by macrophages	1.74e-15	ABCA1, ALOX15, ANXA1, CAPG, CD14, CD44, CH25H, CLEC4M, CYP2S1, FCER1G, FCGR1A, FCGR2A, FCGR2B, FCN1, FGR, GSN, HCK, HGF, HMOX1, IL1B, INPP5D, ISG15, ITGAM, ITGB2, LGALS3, NOD2, PLA2G5, PLAUR, PTPRC, RAPGEF3, S100A9, SCARB1, SCN5A, SFTPA1, SIGLEC1, SIRPA, SPI1, SPIC, THBS1, TLR2, TLR3, TLR4, TLR9, TNF, TRPV2	45
Cellular Movement	infiltration	infiltration by neutrophils	5.28e-19	ADAM17, ADIPOQ, ADRB3, ADRBK1, AGT, ALOX5AP, ANXA1, APOE, B4GALT1, C2, C3, C4A/C4B, CASP1, CCL21, CCL4, CD14, CD44, CFB, CFH, CMKLR1, CTSB, CXCL10, CXCL2, CXCL3, CXCR2, F2RL1, FABP4, FAS, FCER1G, FPR1, FUT4, FUT7, GJB2, HGF, HMOX1, ICAM1, IL10, IL17RA, IL18, IL1A, IL1B, IL1R1, IL1RN, IL33, IL6, IL6R, ITGAL, ITGAM, ITGB2, JAK3, LGALS1, LTB4R, MAP3K8, MDK, MMP12, MMP8, MMP9, MYD88, NCF1, NOS2, NT5E…	91		Hematological System Development and Function	function	function of T lymphocytes	6.27e-26	ABCB1, Abcb1b, ADGRE1, ATF3, ATM, B2M, BATF3, BCL2L11, BCL3, BIRC3, BIRC5, CACNB3, Ccl2, CCR6, CCR7, CD247, CD27, CD276, CD28, CD3E, CD3G, CD4, CD44, CD69, CD80, CD84, CD86, CD8A, CD8B, CDKN2C, CIITA, Cmah, CSF2RB, CTLA4, CTSC, CTSS, CXCL10, EBI3, ECM1, ERAP1, FCER1G, FYB, GPR84, GRK6, HAVCR2, HCST, HLA-A, HLA-G, HSH2D, ICAM1, ICOS, IFNAR1, IFNGR2, IL10, IL10RA, IL12A, IL13RA1, IL16, IL18, IL18R1…	145		Hematological System Development and Function	aggregation	aggregation of blood cells	1.03e-13	ACTG1, ADAMTS18, ADIPOQ, AKR1B1, ALOX12, BTK, C3, C4BPA, CCL17, CCL22, CCL5, CCR4, CD4, CD40, CD44, CD63, CD9, CDH1, CES1, CLNS1A, CXCL10, CXCR3, DAB2, EFNA4, EPHB1, F2R, FCER1G, FCGR2A, FERMT3, FGF4, GNAZ, GSN, HCLS1, HDC, HSPB1, HTR2A, ICAM1, IL6, INPP5D, ITGAL, ITGB2, JAK2, LAT, LCK, LCP2, LEP, LYN, MET, MYL9, NRP1, P2RX1, P2RY12, PDPN, PIK3CB, PIK3R1, PLAT, PLCB1, PLCB2, PLCG2, PLEK, PRKCA, P…	88		Hematological System Development and Function	phagocytosis	phagocytosis of myeloid cells	3.37e-21	ABCA1, ALOX15, ANXA1, C3, CAPG, CD14, CD44, CH25H, CLCN3, CLEC4M, CORO1A, CXCL10, CYP2S1, FCER1G, FCGR1A, FCGR2A, FCGR2B, FCGR3A/FCGR3B, FCMR, FCN1, FGR, GLRX, GSN, HCK, HGF, HMOX1, IL1B, INPP5D, IRF8, ISG15, ITGAM, ITGB2, LCN2, LGALS3, NOD2, PF4, PLA2G5, PLAUR, PTPRC, RAPGEF3, S100A9, SCARB1, SCN5A, SELPLG, SFTPA1, SIGLEC1, SIRPA, SPI1, SPIC, SYK, THBS1, TLR2, TLR3, TLR4, TNF, TREM1, TRPV2, VAV1…	59
Cellular Movement	infiltration	infiltration by mononuclear leukocytes	2.18e-13	AGT, APOE, APP, ARRB2, BGN, C3, CBFB, Ccl2, CCL2, CCL21, CCL22, CCL3L3, CCL4, CCR7, CD44, CD80, CD86, CIITA, COL4A3, CXCL10, CXCL16, ESR1, ESR2, F2RL1, FAS, FOXP3, GJB2, HCK, HLA-A, HMOX1, ICOS, IKBKG, IL10, IL11RA, IL16, IL17C, IL17RA, IL18, IL18BP, IL1B, IL33, IL6, ITGA1, ITGA4, JAK3, KCNK2, LGALS1, LTB, MMP12, MMP9, MYD88, MYLK, NFATC2, NFKB1, NFKBIZ, NLRP3, NTN1, OLFM4, OSM, PF4, PIK3CD, PIK3…	87		Hematological System Development and Function	function	function of macrophages	2.13e-22	AHR, ANPEP, APOE, ATM, BCL3, BIRC3, CAPG, CARD9, CASP8, CAV1, CCL2, Ccl2, CCL5, CCR6, CD14, CD9, CLCN2, CLCN3, CLEC4E, CLEC7A, CNR2, CSF1R, CXCL10, CYBB, DOK1, DOK2, FCER1A, FCER1G, FCGR1A, FCGR2A, FCGR2B, FES, FGR, FOS, GPR68, GRN, GSN, HCK, HSPB1, ICAM1, IFNAR1, IL10, IL18, IL1B, IL31RA, IL4R, IL6, IRAK2, IRAK4, IRF1, ITGAM, LCP1, LGALS3, LGMN, LY96, LYN, MMP12, MMP7, MSR1, MST1, MYD88, NCEH1, …	103		Hematological System Development and Function	engulfment	engulfment of myeloid cells	1.53e-13	ABCA1, ANXA1, APOA2, ATG7, C3, CAPG, CD14, CD44, CH25H, CLCN3, CLEC4M, CORO1A, CXCL10, CYP2S1, FCER1G, FCGR1A, FCGR2A, FCGR2B, FCGR3A/FCGR3B, FCMR, FCN1, FGR, GLRX, GSN, HCK, HGF, HMOX1, IL1A, IL1B, INPP5D, IRF8, ISG15, ITGAM, ITGB2, LCN2, LGALS3, MIF, MSR1, NOD2, PF4, PLA2G5, PLAUR, PTPRC, RAPGEF3, S100A9, SELPLG, SIGLEC1, SPI1, SPIC, SYK, THBS1, TLR2, TNF, TPH1, TREM1, TRPV2, VAV1, WAS	58		Hematological System Development and Function	phagocytosis	phagocytosis by macrophages	7.03e-15	ABCA1, ALOX15, ANXA1, CAPG, CD14, CD44, CH25H, CLEC4M, CYP2S1, FCER1G, FCGR1A, FCGR2A, FCGR2B, FCN1, FGR, GSN, HCK, HGF, HMOX1, IL1B, INPP5D, ISG15, ITGAM, ITGB2, LGALS3, NOD2, PLA2G5, PLAUR, PTPRC, RAPGEF3, S100A9, SCARB1, SCN5A, SFTPA1, SIGLEC1, SIRPA, SPI1, SPIC, THBS1, TLR2, TLR4, TNF, TRPV2	43
Cellular Movement	recruitment	recruitment of blood cells	1.93e-22	ADAM17, ADIPOQ, AGT, AHR, ALOX5AP, ANXA1, AOC3, APOE, APP, ARRB2, ATG16L1, B4GALT1, C3, C4A/C4B, C5AR1, CAMP, CARD9, CASP1, Ccl2, CCL2, CCL20, CCL21, CCL22, CCL24, CCL3L3, CCL4, Ccl6, Ccl7, CCR3, CCR4, CCR6, CCR7, CD14, CD19, CD40, CD44, CD8A, CD93, CHI3L1, CLEC4E, CLEC7A, CMKLR1, CNR2, CSF1R, CSF2RB, CTSC, CX3CR1, CXCL10, CXCL11, CXCL16, CXCL2, CXCL3, CXCR2, CXCR3, CXCR4, CYP1A1, DPP4, ENTPD1, F…	164		Hematological System Development and Function	function	function of granulocytes	1.44e-13	ADIPOQ, B4GALT1, BCL2A1, CAV1, Ccl2, CCR3, CD14, CEBPE, CLCN3, CLEC7A, CSF2RB, CXCL10, CXCL6, CYBB, ELANE, FCGR2A, FCMR, FGR, FUT4, FUT7, GJA1, HCK, HLA-G, HSPB1, IL10, IL12A, IL1B, IL1R1, IL1RL1, IL2RG, IL6, ITGAL, ITGAM, ITGB2, LBP, LCP1, LYN, MMP9, MYD88, NCF1, NOS1, PIK3CD, PLAC8, PLAU, PLAUR, PLCB2, PRKCD, RAC2, RASGRP4, S100A4, SELE, SELP, SERPINB1, SIGLEC8, SLAMF6, SPRED1, SYK, TNF	58		Hematological System Development and Function	phagocytosis	phagocytosis of myeloid cells	1.92e-13	ABCA1, ANXA1, APOA2, ATG7, C3, CAPG, CD14, CD44, CH25H, CLCN3, CLEC4M, CORO1A, CXCL10, CYP2S1, FCER1G, FCGR1A, FCGR2A, FCGR2B, FCGR3A/FCGR3B, FCMR, FCN1, FGR, GLRX, GSN, HCK, HGF, HMOX1, IL1B, INPP5D, IRF8, ISG15, ITGAM, ITGB2, LCN2, LGALS3, MIF, NOD2, PF4, PLA2G5, PLAUR, PTPRC, RAPGEF3, S100A9, SELPLG, SIGLEC1, SPI1, SPIC, SYK, THBS1, TLR2, TNF, TPH1, TREM1, TRPV2, VAV1, WAS	56		Hematological System Development and Function	morphology	morphology of T lymphocytes	5.03e-20	ABCB1, Abcb1b, BCL11B, CCR6, CCR9, CD247, CD274, CD28, CD3E, CD4, CD5, CD5L, CD8A, CD8B, CXCL11, CYTIP, EBI3, FCER1G, FCGR2B, HLA-A, HLA-DQA1, HLA-DQB1, HLA-G, IL18, IL1RN, IL2RB, IL2RG, IL7R, INPP5D, IRF1, IRF4, ITK, JAK3, LAT, LCK, LCP2, LGALS3, LY9, LYST, MPZ, PLA2G2D, PRKCQ, PSMB10, PSMB9, PTPN22, PTPRC, RASGRP1, RHOH, SASH3, SERPINB9, SLA, SPI1, TAP1, TBX21, TNF, VAV1, WAS	57
Cellular Movement	recruitment	recruitment of leukocytes	4.63e-22	ADAM17, ADIPOQ, AGT, AHR, ALOX5AP, ANXA1, AOC3, APOE, APP, ARRB2, ATG16L1, B4GALT1, C3, C4A/C4B, C5AR1, CAMP, CARD9, CASP1, Ccl2, CCL2, CCL20, CCL21, CCL22, CCL24, CCL3L3, CCL4, Ccl6, Ccl7, CCR3, CCR4, CCR6, CCR7, CD14, CD19, CD40, CD44, CD8A, CD93, CHI3L1, CLEC4E, CLEC7A, CMKLR1, CNR2, CSF1R, CSF2RB, CTSC, CX3CR1, CXCL10, CXCL11, CXCL16, CXCL2, CXCL3, CXCR2, CXCR3, CXCR4, CYP1A1, DPP4, F2RL1, FC…	161		Hematological System Development and Function	infiltration	infiltration of leukocytes	6.52e-35	ABCB4, ADA, ADAM17, ADIPOQ, ADM, ADRB3, ADRBK1, AGT, ANXA1, APOE, ARG1, ARRB2, B4GALT1, BCL11B, BID, C2, C3, C4A/C4B, C6, CASP1, CAV1, CBFB, CCL19, CCL2, Ccl2, CCL21, CCL22, CCL3L3, CCL4, CCL5, CCR6, CCR7, CD14, CD2, CD276, CD44, CD55, CD80, CD86, CEBPA, CES1, CFB, CFH, CFTR, CIITA, CLEC5A, CMA1, CMKLR1, CNR1, CNR2, COL4A3, CR2, CRYAB, CSF1R, CTLA4, CTSB, CXCL10, CXCL16, CXCL2, CXCL3, CXCR5, CYBB…	216		Hematological System Development and Function	cell viability	cell viability of lymphocytes	2.03e-13	BCL2L11, BCL3, BCL6, BMP4, BTK, BTLA, C3, CACNB3, CAMK4, CASP8, CBFB, CD28, CD3E, CD40, CD44, CD80, CD86, CD8A, CHEK2, CISH, CLEC11A, DLK1, DOCK8, F2R, FASLG, FCGR3A/FCGR3B, HCK, HGF, HSH2D, ICOS, IL17C, IL21R, IL2RB, IL2RG, IL6, IL7R, INPP5D, ITGAL, ITPKB, JAK3, KLF2, LAT, LAX1, LEP, LGALS3, MAPK3, MIF, MYBL2, MYH11, NCF2, NFIL3, NGF, PARP14, PDCD1, PIK3CB, PIK3CD, PIM1, PLCG2, PRDM1, PRKCQ, PTK…	74		Hematological System Development and Function	interaction	interaction of leukocytes	1.94e-19	BTLA, CCL21, CCL4, CCL5, CCR7, CD14, CD2, CD28, CD4, CD40, CD44, CD6, CD69, CD80, CD86, CLEC4M, Cmah, CXCL10, CXCL11, CXCR3, CXCR4, FUT7, FYB, ICAM1, ICOS, IL10, IL17RA, IL18R1, ITGA4, ITGAL, ITGB2, ITK, LCK, LCP2, LFNG, LIF, Ly6a (includes others), NPY, NRP1, RGS16, SELP, SELPLG, SKAP1, SPN, TLR2, TNC, TNFRSF8, TNFSF11, TXK	49
Cellular Movement	recruitment	recruitment of cells	2.28e-21	ADAM17, ADIPOQ, AGT, AHR, ALOX5AP, ANXA1, AOC3, APOE, APP, ARRB2, ATG16L1, B4GALT1, C3, C4A/C4B, C5AR1, CAMP, CARD9, CASP1, Ccl2, CCL2, CCL20, CCL21, CCL22, CCL24, CCL3L3, CCL4, Ccl6, Ccl7, CCR3, CCR4, CCR6, CCR7, CD14, CD19, CD40, CD44, CD63, CD8A, CD93, CHI3L1, CLEC4E, CLEC7A, CMKLR1, CNR2, CSF1R, CSF2RB, CTSC, CX3CR1, CXCL10, CXCL11, CXCL13, CXCL16, CXCL2, CXCL3, CXCR2, CXCR3, CXCR4, CYP1A1, D…	173		Hematological System Development and Function	infiltration	infiltration of myeloid cells	4.26e-24	ADAM17, ADIPOQ, ADM, ADRB3, ADRBK1, AGT, ANXA1, APOE, ARRB2, B4GALT1, C2, C3, C4A/C4B, CASP1, CBFB, CCL19, CCL21, CCL4, CCL5, CCR7, CD14, CD2, CD44, CD55, CFB, CFH, CFTR, CMA1, CMKLR1, CRYAB, CTSB, CXCL10, CXCL2, CXCL3, CXCR5, ELANE, F2R, F2RL1, FASLG, FCER1G, FUT4, FUT7, GJB2, HCK, HGF, HIF1A, HMOX1, HSPB1, ICAM1, IL10, IL17RA, IL18, IL1A, IL1B, IL1R1, IL1RL1, IL1RN, IL21, IL2RB, IL4R, IL6, IRF6…	121		Hematological System Development and Function	maturation	maturation of lymphocytes	7.97e-13	ABCG1, ADAM17, AHR, ATM, BIRC5, BLNK, BTK, BTLA, CADM1, CD247, CD28, CD3E, CD4, CD40, CD80, CD86, EPHB6, HLA-DRA, ICOS, IL18, IL1A, IL21R, IL6, IL7R, ITK, Klra4 (includes others), LAT, LCK, LCP1, MAP3K14, MAPK3, NFIL3, PARP14, PIK3CD, PIK3R1, PLCG2, POU2F2, PRDM1, PTPN6, PTPRC, RASGRP1, RHOH, RUNX1, RUNX3, SELL, Slfn2, SRSF2, TBX21, TNF, TNFSF11, TNFSF13, TXK, TYROBP, VAV1, VAV2, ZNF423	56		Hematological System Development and Function	interaction	interaction of mononuclear leukocytes	4.92e-19	BTLA, CCL21, CCL4, CCL5, CCR7, CD14, CD2, CD28, CD4, CD40, CD44, CD6, CD69, CD80, CD86, CLEC4M, Cmah, CXCL10, CXCL11, CXCR3, CXCR4, FUT7, FYB, ICAM1, ICOS, IL10, IL17RA, IL18R1, ITGA4, ITGAL, ITGB2, ITK, LCK, LCP2, LFNG, LIF, Ly6a (includes others), NPY, NRP1, RGS16, SELPLG, SKAP1, SPN, TLR2, TNC, TNFRSF8, TNFSF11, TXK	48
Cellular Movement	recruitment	recruitment of myeloid cells	1e-19	ADAM17, AGT, AHR, ALOX5AP, ANXA1, AOC3, APOE, APP, ARRB2, ATG16L1, B4GALT1, C3, C5AR1, CAMP, CARD9, CASP1, Ccl2, CCL2, CCL20, CCL22, CCL24, CCL3L3, CCL4, Ccl7, CCR3, CCR6, CD14, CD19, CD44, CD8A, CHI3L1, CLEC4E, CNR2, CSF1R, CSF2RB, CTSC, CX3CR1, CXCL10, CXCL2, CXCL3, CXCR2, CYP1A1, DPP4, F2RL1, FCER2, FCGR2A, FCGR2B, FCGR3A/FCGR3B, FUT7, GLRX, GRK6, GSN, ICAM1, IFNAR1, IL10, IL17RA, IL18, IL1A, …	116		Hematological System Development and Function	infiltration	infiltration of granulocytes	6.58e-24	ADAM17, ADIPOQ, ADM, ADRB3, ADRBK1, AGT, ANXA1, APOE, ARRB2, B4GALT1, C2, C3, C4A/C4B, CASP1, CBFB, CCL19, CCL21, CCL4, CCL5, CCR7, CD14, CD2, CD44, CD55, CFB, CFH, CFTR, CMA1, CMKLR1, CRYAB, CTSB, CXCL10, CXCL2, CXCL3, CXCR5, ELANE, F2R, F2RL1, FASLG, FCER1G, FUT4, FUT7, GJB2, HCK, HGF, HIF1A, HMOX1, HSPB1, ICAM1, IL10, IL17RA, IL18, IL1A, IL1B, IL1R1, IL1RL1, IL1RN, IL21, IL2RB, IL4R, IL6, IRF6…	120		Hematological System Development and Function	stimulation	stimulation of leukocytes	2.52e-11	ADORA1, ANGPT1, BMP4, BTLA, C3, C5AR1, CCL2, CCL5, CD1D, CD2, CD28, CD3E, CD4, CD40, CD5, CD69, CD80, CD83, CD86, CDKN2B, CLEC4E, CLEC4M, CXCL10, CXCL11, CXCL3, FASLG, FN1, HAVCR2, HLA-G, HMOX1, ICOS, IGF2, IL11, IL18, IL1B, IL1RN, IL4R, IL6, IRF6, ITK, KLRC1, KLRD1, Klrk1, LCN2, LEP, LGALS3, LIF, LILRB4, MIF, MSLN, NOS2, P2rx7, PDCD1, PF4, PTPRC, SPN, STEAP1, TLR2, TLR9, TNF, TNFRSF18, TNFRSF1B,…	65		Hematological System Development and Function	interaction	interaction of lymphocytes	2.04e-18	BTLA, CCL21, CCL4, CCL5, CCR7, CD2, CD28, CD4, CD40, CD44, CD6, CD69, CD80, CD86, CLEC4M, Cmah, CXCL10, CXCL11, CXCR3, CXCR4, FUT7, FYB, ICAM1, ICOS, IL10, IL17RA, IL18R1, ITGA4, ITGAL, ITGB2, ITK, LCK, LCP2, LFNG, LIF, Ly6a (includes others), NPY, NRP1, RGS16, SELPLG, SKAP1, SPN, TLR2, TNC, TNFRSF8, TNFSF11, TXK	47
Cellular Movement	recruitment	recruitment of granulocytes	4.04e-18	ADAM17, AGT, AHR, ALOX5AP, ANXA1, APOE, ARRB2, ATG16L1, B4GALT1, C3, C5AR1, CAMP, CARD9, CASP1, Ccl2, CCL2, CCL20, CCL22, CCL24, CCL3L3, CCL4, Ccl7, CCR3, CCR6, CD14, CD19, CD44, CD8A, CHI3L1, CLEC4E, CSF2RB, CTSC, CX3CR1, CXCL10, CXCL2, CXCL3, CXCR2, CYP1A1, DPP4, F2RL1, FCER2, FCGR2A, FCGR2B, FCGR3A/FCGR3B, FUT7, GLRX, GRK6, GSN, ICAM1, IFNAR1, IL10, IL17RA, IL18, IL1A, IL1B, IL1R1, IL1RL1, IL1…	109		Hematological System Development and Function	infiltration	infiltration by neutrophils	4e-20	ADAM17, ADIPOQ, ADM, ADRB3, ADRBK1, AGT, ANXA1, APOE, B4GALT1, C2, C3, C4A/C4B, CASP1, CCL21, CCL4, CD14, CD44, CD55, CFB, CFH, CFTR, CMKLR1, CTSB, CXCL10, CXCL2, CXCL3, ELANE, F2RL1, FASLG, FCER1G, FUT4, FUT7, GJB2, HGF, HMOX1, HSPB1, ICAM1, IL10, IL17RA, IL18, IL1A, IL1B, IL1R1, IL1RN, IL6, IRF6, ITGAL, ITGAM, ITGB2, JAK3, LBP, LCN2, LGALS1, MAP3K8, MMP12, MMP8, MMP9, MYD88, NCF1, NT5E, NTN1, P…	92		Tissue Morphology	quantity	quantity of leukocytes	1.12e-67	ABCA1, ABCB1, Abcb1b, ABCG2, ADA, ADAM17, ADIPOQ, AGR2, AGT, AHR, ALPL, ANPEP, APOE, ARNTL, ATF3, ATM, B3GNT5, BACH2, BANK1, BATF, BATF3, BCL11A, BCL11B, BCL2A1, BCL2L11, BCL3, BCL6, BDNF, BID, BIRC3, BIRC5, BLK, BLNK, BMF, BRCA2, BST1, BTK, BTLA, BUB1, C1QA, C3, C5AR1, C5AR2, C6, CAMK4, CASP3, CASP8, CBFB, CCL19, CCL2, Ccl2, CCL21, CCL22, CCL3L3, CCL4, CCL5, Ccl7, Ccl9, CCNB2, CCR4, CCR6, CCR7, …	412		Hematological System Development and Function	interaction	interaction of T lymphocytes	5.31e-17	BTLA, CCL21, CCL4, CCL5, CCR7, CD2, CD28, CD4, CD40, CD6, CD69, CD80, CD86, Cmah, CXCL10, CXCL11, CXCR3, CXCR4, FUT7, FYB, ICAM1, ICOS, IL10, IL17RA, IL18R1, ITGA4, ITGAL, ITGB2, ITK, LCK, LCP2, LFNG, Ly6a (includes others), NPY, NRP1, RGS16, SELPLG, SKAP1, SPN, TLR2, TNC, TNFRSF8, TNFSF11, TXK	44
Cellular Movement	recruitment	recruitment of phagocytes	4.04e-16	ADAM17, ADIPOQ, AGT, AHR, ALOX5AP, ANXA1, APOE, APP, ARRB2, ATG16L1, B4GALT1, C5AR1, CAMP, CASP1, Ccl2, CCL2, CCL20, CCL22, CCL3L3, CCL4, Ccl7, CD14, CD19, CD40, CD44, CD8A, CHI3L1, CLEC4E, CMKLR1, CSF1R, CTSC, CX3CR1, CXCL10, CXCL2, CXCL3, CXCR2, CYP1A1, F2RL1, FCER2, FCGR2A, FCGR2B, FCGR3A/FCGR3B, FUT7, FUT8, GLRX, GPC3, GRK6, GSN, HCAR2, ICAM1, IFNAR1, IL10, IL17RA, IL18, IL1A, IL1B, IL1R1, IL…	117		Hematological System Development and Function	infiltration	infiltration by mononuclear leukocytes	2.15e-16	AGT, APOE, ARRB2, BCL11B, C3, C6, CBFB, CCL19, CCL2, Ccl2, CCL21, CCL22, CCL3L3, CCL4, CCR7, CD44, CD55, CD80, CD86, CIITA, COL4A3, CTLA4, CXCL10, CXCL16, ESR1, ESR2, F2RL1, FASLG, FN1, GJB2, HCK, HLA-A, HMOX1, ICOS, IL10, IL11RA, IL16, IL17RA, IL18, IL18BP, IL1B, IL21, IL6, IRF6, ITGA1, ITGA4, ITK, JAK3, KCNK2, LAG3, LDLR, LGALS1, LTB, MMP12, MMP9, MYD88, MYLK, NFKBIZ, NLRP3, NTN1, OSM, PDCD1, P…	92		Tissue Morphology	quantity	quantity of cells	4.16e-67	ABCA1, ABCB1, Abcb1b, ABCG2, ACVR1C, ADA, ADAM17, ADIPOQ, ADRA1B, ADRB1, AGR2, AGT, AHR, ALCAM, ALDH1A2, ALK, ALPL, AMH, ANPEP, ANXA1, AOC3, APOD, APOE, ARNTL, ARNTL2, ARX, ATF3, ATG7, ATM, ATP2B2, B3GNT5, BACH2, BANK1, BATF, BATF3, BCL11A, BCL11B, BCL2A1, BCL2L11, BCL3, BCL6, BDNF, BID, BIRC3, BIRC5, BLK, BLNK, BMF, BMP4, BMP6, BRCA1, BRCA2, BST1, BTC, BTK, BTLA, BUB1, C1QA, C3, C5AR1, C5AR2, C6…	637		Hematological System Development and Function	blood pressure	blood pressure	4.42e-19	ABAT, ACE2, ACTA2, ADIPOQ, ADORA1, ADRA1D, ADRB1, ADRB3, AGT, Agtr1b, AHR, ALOX12, APLN, APLNR, APOE, ARNTL, ARSB, ATP1A2, BBC3, BDNF, CACNA1B, CACNA1C, CACNB3, CD274, CD44, CHGA, CKMT2, CNR1, COL4A3, CRYAB, CYBA, CYBB, CYP4F2, DBP, DDAH1, EDN1, EDNRA, EDNRB, ELN, EPHX2, ESR2, F2RL1, GBP5, GPX1, Hba1/Hba2, HMOX1, HSD11B1, HSD11B2, HTR2B, IL10, IL1B, IL1R1, KCNJ11, KCNMB1, KCNN4, LEP, Mcpt1, MMP9,…	101
Cellular Movement	recruitment	recruitment of neutrophils	1.42e-15	ADAM17, AGT, AHR, ALOX5AP, ANXA1, APOE, ARRB2, ATG16L1, B4GALT1, C5AR1, CAMP, CASP1, Ccl2, CCL2, CCL20, CCL22, CCL3L3, CCL4, Ccl7, CD14, CD19, CD44, CD8A, CHI3L1, CLEC4E, CTSC, CX3CR1, CXCL10, CXCL2, CXCL3, CXCR2, CYP1A1, F2RL1, FCGR2A, FCGR2B, FCGR3A/FCGR3B, FUT7, GLRX, GRK6, GSN, ICAM1, IFNAR1, IL10, IL17RA, IL18, IL1A, IL1B, IL1R1, IL1RN, IL33, IL6, IL6R, ITGAM, ITGB2, LEP, LGALS3, LIF, LSP1, …	92		Hematological System Development and Function	infiltration	infiltration of phagocytes	8.05e-15	ADAM17, ADIPOQ, AGT, ANXA1, APOE, ARG1, BID, C3, C6, CASP1, CAV1, CCL2, Ccl2, CCL4, CCR6, CD44, CES1, CFTR, CNR1, CNR2, COL4A3, CSF1R, CXCL10, CYBB, CYSLTR2, EGLN3, GAL3ST1, GBA, HGF, HIF1A, HMOX1, ICAM1, IL10, IL16, IL17RA, IL18, IL1B, IL1RN, IL6, IRF6, ITGB2, LCAT, LDLR, LEP, LTB, MAP3K8, MMP12, MMP9, MYD88, MYRF, NDRG1, NFKBIZ, NINJ1, NLRP3, NOS1, NR3C2, NTN1, PDCD1, PLA2G4A, PLAU, PLP1, PLTP,…	89		Tissue Morphology	quantity	quantity of blood cells	4.6e-64	ABCA1, ABCB1, Abcb1b, ABCG2, ADA, ADAM17, ADIPOQ, AGR2, AGT, AHR, ALPL, ANPEP, APOE, ARNTL, ATF3, ATG7, ATM, B3GNT5, BACH2, BANK1, BATF, BATF3, BCL11A, BCL11B, BCL2A1, BCL2L11, BCL3, BCL6, BDNF, BID, BIRC3, BIRC5, BLK, BLNK, BMF, BMP4, BRCA2, BST1, BTK, BTLA, BUB1, C1QA, C3, C5AR1, C5AR2, C6, CAMK4, CASP3, CASP8, CBFB, CCL19, CCL2, Ccl2, CCL21, CCL22, CCL3L3, CCL4, CCL5, Ccl7, Ccl9, CCNB2, CCND1,…	443		Hematological System Development and Function	expansion	expansion of leukocytes	2.07e-18	ABCB1, AHR, BTK, BTLA, C3, C5AR1, CASP8, CCR6, CCR7, CD180, CD2, CD244, CD27, CD274, CD28, CD3E, CD4, CD40, CD69, CD80, CD86, CSF1R, CTSD, CXCR3, DOK1, FCGR2B, FLT3, HAVCR2, HMOX1, ICOS, IL10, IL10RA, IL18, IL1B, IL21R, IL4R, IL7R, IRF1, ITK, JAK3, Klrk1, LAG3, LCP1, LCP2, LEP, LY9, LYN, MET, NOS1, PDCD1, PIK3CB, PIK3CD, PIM1, PRF1, PTPRC, RUNX1, SERPINB9, SIGLEC10, SNAI3, SOCS1, SPI1, STAT4, SYK…	75
Cellular Movement	invasion	invasion of cells	1.08e-18	A2M, ACSL4, ADAM17, ADAMTS1, ADIPOQ, AGT, AHCY, AJAP1, ALCAM, ALKBH3, ANGPTL4, ANPEP, ANXA1, ANXA2, APEX1, APP, AR, AREG, ARF6, ARHGAP4, ARHGDIA, ATF1, AURKA, BATF3, BAX, BCAN, BCAT1, BIRC5, BMP2, BMP4, BMP6, BRCA1, BTC, C1QBP, CA3, CA9, CASP3, CCL2, CCL21, CCNA2, CCND1, CCR7, CCR9, CD14, Cd24a, CD274, CD44, CD53, CD82, CD9, CD97, CDH1, CDK1, CDK5R1, CDKN1A, CDKN1B, CEACAM1, CHI3L1, CHRD, CLCA2, …	342		Hematological System Development and Function	infiltration	infiltration of macrophages	5.34e-14	ADAM17, ADIPOQ, AGT, ANXA1, APOE, ARG1, BID, C3, C6, CASP1, CAV1, Ccl2, CCL2, CCR6, CD44, CES1, CNR1, CNR2, COL4A3, CSF1R, CXCL10, CYBB, CYSLTR2, EGLN3, GAL3ST1, GBA, HGF, HIF1A, HMOX1, ICAM1, IL10, IL16, IL17RA, IL18, IL1B, IL1RN, IRF6, ITGB2, LCAT, LDLR, LEP, LTB, MAP3K8, MYD88, MYRF, NDRG1, NINJ1, NLRP3, NOS1, NR3C2, PDCD1, PLA2G4A, PLAU, PLP1, PLTP, PRCP, PRDM1, PRKCD, PRKCQ, PTK2B, RAC2, REN…	80		Tissue Morphology	quantity	quantity of lymphocytes	2.5e-51	ABCB1, Abcb1b, ABCG2, ADA, ADIPOQ, AGT, AHR, ANPEP, APOE, ARNTL, ATM, B3GNT5, BACH2, BANK1, BATF, BATF3, BCL11A, BCL11B, BCL2A1, BCL2L11, BCL3, BID, BIRC5, BLK, BLNK, BMF, BST1, BTK, BTLA, C3, C5AR1, CAMK4, CASP3, CASP8, CBFB, CCL19, CCL2, Ccl2, CCL21, CCL4, CCL5, CCNB2, CCR4, CCR6, CCR7, CCR9, CD180, CD1D, CD244, CD247, CD27, CD28, CD3D, CD3E, CD3G, CD4, CD40, CD44, CD5, CD5L, CD69, CD7, CD72, C…	313		Hematological System Development and Function	expansion	expansion of T lymphocytes	2.34e-18	AHR, BTLA, C3, C5AR1, CASP8, CCR6, CCR7, CD2, CD244, CD27, CD274, CD28, CD3E, CD4, CD40, CD69, CD80, CD86, CTSD, CXCR3, DOK1, HAVCR2, ICOS, IL10, IL18, IL1B, IL21R, IL4R, IL7R, IRF1, ITK, JAK3, Klrk1, LAG3, LCP1, LCP2, LEP, LY9, NOS1, PDCD1, PIK3CB, PIK3CD, PIM1, PRF1, SERPINB9, SOCS1, SPI1, STAT4, SYK, TBX21, TGFBR1, Timd2, TLR2, TLR3, TNF, TNFRSF18, TNFRSF1B, TNFSF15, Tnfsf9, ZAP70, ZBTB16	61
Cellular Movement	cell tethering or rolling	cell tethering or rolling	2.41e-12	ADAM17, ANXA1, AOC3, ARNTL, BTK, CCL2, CCR7, CD14, CD209, CD44, CD63, CHST1, CHST4, CXCL2, CXCL3, CXCR2, F2RL1, FAS, FCGR2A, FCGR3A/FCGR3B, FGR, FUT4, FUT7, FYB, HCK, HTR2A, ICAM1, ICAM2, IL1B, ITGA4, ITGAL, ITGAM, ITGB2, ITGB7, LCP2, LGALS3, LYN, NOS1, NOS3, PODXL2, PRDX1, PREX1, PRKCQ, RAC2, SELE, SELL, SELP, SELPLG, SPN, ST3GAL4, ST6GALNAC2, TLR4, TNF	53		Hematological System Development and Function	differentiation	differentiation of blood cells	2.05e-32	ADA, ADAM17, ADD2, ADIPOQ, ADORA1, AGT, AHR, ALAS2, ANGPT1, ANXA1, APAF1, ARID3A, ARNTL, ATM, ATPIF1, B2M, BAIAP2, BATF, BATF3, BCL11A, BCL11B, BCL2A1, BCL2L11, BCL3, BLNK, BMP4, BRCA2, BTK, C5AR1, CAMK4, CASP3, CASP8, CBFB, CCL2, CCL21, CCR7, CCR9, CD14, CD1D, CD2, CD226, CD247, Cd24a, CD27, CD28, CD300A, CD38, CD3D, CD3E, CD3G, CD4, CD40, CD6, CD69, CD72, CD80, CD83, CD86, CD8A, CD8B, CDKN1A, C…	372		Tissue Morphology	quantity	quantity of mononuclear leukocytes	8.47e-51	ABCB1, Abcb1b, ABCG2, ADA, ADIPOQ, AGT, AHR, ANPEP, APOE, ARNTL, ATM, B3GNT5, BACH2, BANK1, BATF, BATF3, BCL11A, BCL11B, BCL2A1, BCL2L11, BCL3, BID, BIRC5, BLK, BLNK, BMF, BST1, BTK, BTLA, C3, C5AR1, CAMK4, CASP3, CASP8, CBFB, CCL19, CCL2, Ccl2, CCL21, CCL4, CCL5, Ccl7, CCNB2, CCR4, CCR6, CCR7, CCR9, CD180, CD1D, CD244, CD247, CD27, CD28, CD3D, CD3E, CD3G, CD4, CD40, CD44, CD5, CD5L, CD69, CD7, C…	321		Hematological System Development and Function	expansion	expansion of mononuclear leukocytes	3.58e-17	AHR, BTK, BTLA, C3, C5AR1, CASP8, CCR6, CCR7, CD180, CD2, CD244, CD27, CD274, CD28, CD3E, CD4, CD40, CD69, CD80, CD86, CSF1R, CTSD, CXCR3, DOK1, FCGR2B, HAVCR2, ICOS, IL10, IL10RA, IL18, IL1B, IL21R, IL4R, IL7R, IRF1, ITK, JAK3, Klrk1, LAG3, LCP1, LCP2, LEP, LY9, NOS1, PDCD1, PIK3CB, PIK3CD, PIM1, PRF1, PTPRC, SERPINB9, SIGLEC10, SOCS1, SPI1, STAT4, SYK, TBX21, TGFBR1, Timd2, TLR2, TLR3, TNF, TNF…	68
Cellular Movement	cell rolling	cell rolling	2.87e-12	ADAM17, ANXA1, AOC3, BTK, CCL2, CCR7, CD14, CD209, CD44, CD63, CHST1, CHST4, CXCL2, CXCL3, CXCR2, F2RL1, FAS, FCGR2A, FCGR3A/FCGR3B, FGR, FUT4, FUT7, FYB, HCK, HTR2A, ICAM1, ICAM2, IL1B, ITGA4, ITGAL, ITGAM, ITGB2, ITGB7, LCP2, LGALS3, LYN, NOS3, PODXL2, PRDX1, PREX1, PRKCQ, RAC2, SELE, SELL, SELP, SELPLG, SPN, ST6GALNAC2, TLR4, TNF	50		Hematological System Development and Function	differentiation	differentiation of leukocytes	6.24e-31	ADA, ADAM17, ADIPOQ, ADORA1, AGT, AHR, ANXA1, APAF1, ARID3A, ARNTL, ATM, B2M, BATF, BATF3, BCL11A, BCL11B, BCL2A1, BCL2L11, BCL3, BLNK, BMP4, BTK, C5AR1, CAMK4, CASP8, CBFB, CCL2, CCL21, CCR7, CCR9, CD14, CD1D, CD2, CD226, CD247, Cd24a, CD27, CD28, CD300A, CD38, CD3D, CD3E, CD3G, CD4, CD40, CD6, CD69, CD72, CD80, CD83, CD86, CD8A, CD8B, CDKN1A, CDKN1B, Cdkn1c, CDKN2A, CDKN2B, CEBPA, CEBPE, CHRD, …	321		Tissue Morphology	quantity	quantity of T lymphocytes	4.81e-42	ABCB1, Abcb1b, ABCG2, ADA, ADIPOQ, AGT, AHR, ANPEP, APOE, ATM, BACH2, BATF, BATF3, BCL11A, BCL11B, BCL2A1, BCL2L11, BIRC5, BMF, BTLA, C5AR1, CAMK4, CASP3, CASP8, CBFB, CCL19, Ccl2, CCL21, CCL4, CCL5, CCNB2, CCR4, CCR6, CCR7, CCR9, CD1D, CD244, CD247, CD27, CD28, CD3D, CD3E, CD3G, CD4, CD40, CD44, CD5, CD5L, CD69, CD7, CD80, CD83, CD84, CD86, CD8A, CD8B, CDKN1A, CDKN2A, CHST3, CIITA, CISH, CORO1A,…	241		Hematological System Development and Function	expansion	expansion of lymphocytes	4.26e-17	AHR, BTK, BTLA, C3, C5AR1, CASP8, CCR6, CCR7, CD180, CD2, CD244, CD27, CD274, CD28, CD3E, CD4, CD40, CD69, CD80, CD86, CTSD, CXCR3, DOK1, FCGR2B, HAVCR2, ICOS, IL10, IL18, IL1B, IL21R, IL4R, IL7R, IRF1, ITK, JAK3, Klrk1, LAG3, LCP1, LCP2, LEP, LY9, NOS1, PDCD1, PIK3CB, PIK3CD, PIM1, PRF1, PTPRC, SERPINB9, SIGLEC10, SOCS1, SPI1, STAT4, SYK, TBX21, TGFBR1, Timd2, TLR2, TLR3, TNF, TNFRSF18, TNFRSF1B…	66
Cellular Movement	cell rolling	cell rolling of leukocytes	3.91e-12	ADAM17, ANXA1, AOC3, BTK, CCL2, CCR7, CD14, CD44, CD63, CHST1, CHST4, CXCL2, CXCL3, CXCR2, F2RL1, FAS, FCGR2A, FCGR3A/FCGR3B, FGR, FUT4, FUT7, FYB, HCK, ICAM1, IL1B, ITGA4, ITGAL, ITGAM, ITGB2, ITGB7, LCP2, LGALS3, LYN, NOS3, PRDX1, PREX1, PRKCQ, RAC2, SELE, SELL, SELP, SELPLG, SPN, TLR4, TNF	45		Hematological System Development and Function	differentiation	differentiation of mononuclear leukocytes	3.59e-25	ADA, ADAM17, AGT, AHR, ANXA1, APAF1, ARID3A, ARNTL, ATM, B2M, BATF, BCL11A, BCL11B, BCL2A1, BCL2L11, BCL3, BLNK, BMP4, BTK, C5AR1, CASP8, CBFB, CCL2, CCR7, CCR9, CD14, CD1D, CD2, CD226, CD247, Cd24a, CD27, CD28, CD38, CD3D, CD3E, CD3G, CD4, CD40, CD6, CD69, CD72, CD80, CD83, CD86, CD8A, CD8B, CDKN1B, CDKN2A, CEBPA, CHRD, CIITA, CISH, CLCF1, CR2, CSF1R, CSF2RB, CST3, CTLA4, CXCR4, CXCR5, DCK, DCLR…	258		Tissue Morphology	quantity	quantity of phagocytes	8.56e-35	ABCA1, ADA, ADAM17, ADIPOQ, AGR2, AGT, AHR, APOE, ARNTL, ATF3, BATF3, BCL11A, BCL2A1, BCL2L11, BCL3, BID, BIRC3, C1QA, C3, C5AR1, C5AR2, C6, CCL19, Ccl2, CCL2, CCL21, CCL22, CCL3L3, Ccl7, Ccl9, CCR4, CCR6, CCR7, CD1D, CD200R1, CD300A, CD40, CD83, CDKN1A, CDKN2B, CERK, CES1, CFH, CIITA, CLEC11A, CLEC4D, CLEC4E, CLEC7A, CNR2, CSF1R, CSF3R, CTSS, CTSV, CX3CR1, CXCL10, CXCL14, CXCR6, CYBB, CYP1A1, DD…	186		Hematological System Development and Function	aggregation	aggregation of blood cells	6.27e-18	ACTG1, ADAMTS18, ADIPOQ, AKR1B1, ALB, ALOX12, BTK, C3, C4BPA, CCL17, CCL22, CCL5, CD4, CD40, CD44, CDH1, CES1, CLNS1A, CXCL10, CXCR3, EPHA4, EPHB1, FCER1G, FCGR2A, FERMT3, FGF4, GSN, HBB, HCLS1, HSPB1, HTR2A, ICAM1, INPP5D, ITGAL, ITGB2, JAK2, LAT, LCK, LCP2, LEP, Ly6a (includes others), LYN, MET, MYL9, NRP1, P2RX1, P2RY12, PIK3CB, PLA2G4A, PLCB2, PLCG2, PLEK, PRKCA, PRKCQ, PTGER2, PTK2B, PTPN1, …	82
Immune Cell Trafficking	migration	leukocyte migration	7.59e-59	ABCA1, Abcb1b, ABCB4, ACKR2, ACKR3, ACTB, ADA, ADAM17, ADIPOQ, ADORA1, ADRB3, ADRBK1, AGT, AHR, AIF1, AIMP1, ALCAM, ALOX5AP, ANXA1, ANXA2, AOC3, APOE, APP, AQP1, AQP9, AR, ARG1, ARRB2, ATG16L1, B4GALT1, BATF, BGN, BID, BMP2, BTK, C1QBP, C2, C3, C4A/C4B, C5AR1, C5AR2, CAMK1D, CAMP, CAPG, CARD9, CASP1, CASR, CBFB, Ccl2, CCL2, CCL20, CCL21, CCL22, CCL24, CCL3L3, CCL4, Ccl6, Ccl7, Ccl9, CCND1, CCR3, …	476		Hematological System Development and Function	differentiation	differentiation of lymphocytes	5.95e-24	ADA, ADAM17, AHR, ANXA1, APAF1, ARID3A, ARNTL, ATM, B2M, BATF, BCL11A, BCL11B, BCL2A1, BCL2L11, BCL3, BLNK, BMP4, BTK, C5AR1, CASP8, CBFB, CCR7, CCR9, CD14, CD1D, CD2, CD226, CD247, Cd24a, CD27, CD28, CD38, CD3D, CD3E, CD3G, CD4, CD40, CD6, CD69, CD72, CD80, CD83, CD86, CD8A, CD8B, CDKN1B, CDKN2A, CEBPA, CHRD, CIITA, CISH, CLCF1, CR2, CTLA4, CXCR4, CXCR5, DCK, DCLRE1C, DEF6, DLL1, DNASE2, DNMT1, …	238		Tissue Morphology	quantity	quantity of myeloid cells	1.89e-27	ADA, ADAM17, ADIPOQ, AHR, APOE, ARNTL, BCL2L11, BCL6, BDNF, BID, BRCA2, C1QA, C3, C5AR1, C5AR2, C6, CASP8, Ccl2, CCL2, CCL22, CCL3L3, CCR4, CCR6, CD101, CD1D, CD200R1, CD300A, CD40, CD8A, CD97, CDKN1A, CERK, CFH, CISH, CLEC11A, CLEC4E, CLEC7A, CNR2, CSF1R, CSF3R, CTSE, CXCL6, CXCR4, CYBB, CYP1A1, DOK1, ESR2, F2RL1, FASLG, FCGR1A, FCGR2A, FCGR2B, FES, FUT4, FUT7, FZD9, GADD45A, GHR, GPR132, GRK6, …	152		Hematological System Development and Function	abnormal morphology	abnormal morphology of T lymphocytes	1.9e-17	ABCB1, Abcb1b, BCL11B, CCR6, CCR9, CD247, CD274, CD28, CD3E, CD4, CD5, CD5L, CD8A, CD8B, CYTIP, EBI3, FCER1G, FCGR2B, HLA-DQA1, HLA-DQB1, HLA-G, IL18, IL1RN, IL2RB, IL2RG, IRF1, IRF4, ITK, JAK3, LAT, LCK, LCP2, LGALS3, LY9, PLA2G2D, PRKCQ, PSMB10, PSMB9, PTPN22, PTPRC, RASGRP1, RHOH, SASH3, SERPINB9, SLA, SPI1, TBX21, TNF, VAV1, WAS	50
Immune Cell Trafficking	migration	migration of phagocytes	1.53e-25	ABCA1, ADAM17, ADIPOQ, AGT, ALCAM, ANXA1, ANXA2, AOC3, APOE, APP, AR, C3, CAMP, Ccl2, CCL2, CCL20, CCL21, CCL22, CCL3L3, CCL4, Ccl9, CCND1, CCR7, CD209, CD38, CD40, CD44, CD80, CD86, CDH1, CEACAM1, CEBPE, CLEC11A, CLEC1B, CMKLR1, COL1A1, CSF1R, CTSS, CTSV, CTSZ, CX3CR1, CXCL10, CXCL11, CXCL13, CXCL2, CXCL3, CXCL6, CXCR2, CXCR3, CXCR4, CYBB, DDR2, DOCK8, ENG, F10, FAS, FGR, FPR1, Gm21596/Hmgb1, HC…	150		Hematological System Development and Function	differentiation	differentiation of T lymphocytes	7.33e-17	ADA, ADAM17, AHR, ANXA1, APAF1, ATM, B2M, BATF, BCL11A, BCL11B, BCL2A1, BCL2L11, BCL3, BMP4, C5AR1, CBFB, CCR9, CD1D, CD2, CD226, CD247, CD28, CD3D, CD3E, CD3G, CD4, CD6, CD69, CD80, CD83, CD86, CD8A, CD8B, CDKN1B, CDKN2A, CEBPA, CHRD, CIITA, CISH, CTLA4, CXCR4, DCK, DCLRE1C, DEF6, DLL1, DNASE2, DNMT1, EGR2, FADD, FCGR2B, FOXO1, GATA1, GATA2, GATA3, GRAP2, HAVCR2, HLA-G, HMGA1, ICAM1, ICOS, IFNAR…	172		Tissue Morphology	quantity	quantity of hematopoietic progenitor cells	5.94e-25	ABCB1, Abcb1b, AHR, APOE, ARNTL, ATG7, ATM, BCL11A, BCL11B, BCL2L11, BCL3, BIRC5, BLK, BLNK, BMF, BRCA2, BTK, CASP3, CASP8, CBFB, CCNB2, CCND1, CCR6, CCR7, CCR9, CD180, CD244, CD247, CD28, CD3E, CD3G, CD4, CD40, CD44, CD5, CD5L, CD69, CD7, CD72, CD80, CD86, CD8A, CD8B, CD9, CDH17, CDK4, CDKN1A, CDKN2A, CIB1, CIITA, CLEC11A, CORO1A, CSF3R, CTSD, CTSE, CXCR4, DCLRE1C, DLK1, DNASE2, DOK1, DYRK3, EPB…	177		Hematological System Development and Function	abnormal quantity	abnormal quantity of leukocytes	2.01e-17	APOE, BCL2L11, BIRC3, CCR6, CCR9, CD247, CD4, CD74, CD80, CD86, CD8A, CSF1R, CXCL10, DLK1, ESR2, FCGR2A, FES, HMOX1, ICOS, IL10, IL1RN, IL2RG, IRF1, IRF8, ITGAD, ITGAM, JAK3, LCK, MS4A1, NOS2, NPY1R, PTPRC, RHOH, SELE, SELL, SELP, SH3BP2, SIGLEC1, SIT1, SPI1, SYK, TAP1, VAV1, ZBTB7B	44
Immune Cell Trafficking	migration	migration of mononuclear leukocytes	8.81e-25	ABCA1, Abcb1b, ACKR2, ACKR3, ACTB, ADAM17, AGT, ANXA1, ANXA2, AOC3, APP, ARRB2, BATF, BTK, C3, CAMP, Ccl2, CCL2, CCL20, CCL21, CCL22, CCL24, CCL3L3, CCL4, Ccl6, CCR3, CCR4, CCR6, CCR7, CCR9, CD1D, CD2, CD209, CD22, CD226, CD247, CD274, CD40, CD44, CD80, CD86, CD8A, CEACAM1, CMKLR1, COL1A1, COL4A3, CTSS, CTSV, CX3CR1, CXCL10, CXCL11, CXCL13, CXCL16, CXCL3, CXCR3, CXCR4, CYSLTR1, CYTIP, DIAPH1, DOC…	188		Hematological System Development and Function	differentiation	differentiation of B lymphocytes	1.08e-13	ADAM17, AHR, ARID3A, ARNTL, ATM, BCL11A, BCL2L11, BCL3, BLNK, BTK, CASP8, CD14, Cd24a, CD27, CD38, CD40, CD69, CD72, CEBPA, CLCF1, CR2, CXCR4, CXCR5, DCK, DCLRE1C, DLL1, ESR1, EXTL1, EZR, FLT3, FOS, HDAC9, HHEX, HMGA1, Hmgb3, ICOS, IKZF3, IL10, IL12A, IL18, IL21, IL21R, IL2RB, IL2RG, IL6, IL7R, INHA, INHBA, INPP5D, IRF8, JAK3, KLHL6, LAT, LCP1, LGALS1, LGALS3, LIG4, LYL1, LYN, MGAT2, MLLT11, MSH2…	104		Tissue Morphology	quantity	quantity of granulocytes	9.14e-25	ADA, ADAM17, ADIPOQ, AHR, ARNTL, BCL2L11, BCL6, BID, C1QA, C3, C5AR1, C5AR2, C6, Ccl2, CCL2, CCL22, CCL3L3, CCR4, CCR6, CD101, CD1D, CD200R1, CD300A, CD40, CD8A, CD97, CDKN1A, CERK, CFH, CISH, CLEC11A, CLEC4E, CLEC7A, CNR2, CSF1R, CSF3R, CTSE, CXCL6, CYBB, CYP1A1, DOK1, ESR2, F2RL1, FASLG, FCGR1A, FCGR2A, FCGR2B, FES, FUT4, FUT7, FZD9, GADD45A, GPR132, GRK6, GSN, HDC, ICAM1, IL13RA1, IL17RA, IL18…	134		Hematological System Development and Function	abnormal quantity	abnormal quantity of lymphocytes	1.92e-14	APOE, BCL2L11, CCR6, CCR9, CD247, CD4, CD74, CD80, CD86, CD8A, CXCL10, DLK1, ESR2, ICOS, IL10, IL2RG, IRF1, IRF8, ITGAD, ITGAM, JAK3, LCK, MS4A1, NPY1R, PTPRC, RHOH, SELL, SH3BP2, SIGLEC1, SIT1, SPI1, SYK, TAP1, VAV1, ZBTB7B	35
Immune Cell Trafficking	migration	Lymphocyte migration	9.91e-23	Abcb1b, ACKR2, ACKR3, ACTB, ADAM17, AGT, ANXA1, AOC3, APP, ARRB2, BATF, BTK, C3, CAMP, Ccl2, CCL2, CCL20, CCL21, CCL22, CCL24, CCL3L3, CCL4, Ccl6, CCR3, CCR4, CCR6, CCR7, CCR9, CD1D, CD2, CD209, CD22, CD226, CD247, CD274, CD40, CD44, CD80, CD86, CD8A, CEACAM1, CMKLR1, COL1A1, COL4A3, CTSS, CTSV, CX3CR1, CXCL10, CXCL11, CXCL13, CXCL16, CXCL3, CXCR3, CXCR4, CYSLTR1, CYTIP, DIAPH1, DOCK8, DPP4, EFNB…	173		Hematological System Development and Function	migration	migration of mononuclear leukocytes	1.49e-30	ABCA1, Abcb1b, ACKR2, ACKR3, ACTB, ADAM17, AGT, ANXA1, ANXA2, AOC3, ARRB2, BATF, BCL11B, BTK, C3, C6, CCL17, CCL19, Ccl2, CCL2, CCL21, CCL22, CCL3L3, CCL4, CCL5, Ccl6, CCR3, CCR6, CCR7, CCR9, CD1D, CD2, CD209, CD22, CD226, CD247, CD28, CD3E, CD4, CD40, CD44, CD69, CD80, CD86, CD8A, CMKLR1, COL1A1, COL4A3, CTLA4, CTSS, CTSV, CX3CR1, CXCL10, CXCL11, CXCL13, CXCL16, CXCL3, CXCR3, CXCR4, CXCR5, CYSLT…	198		Tissue Morphology	quantity	quantity of B lymphocytes	5.12e-24	AHR, APOE, ARNTL, ATM, B3GNT5, BACH2, BANK1, BCL2A1, BCL2L11, BCL3, BLK, BLNK, BMF, BST1, BTK, C3, CASP8, CCR6, CCR7, CCR9, CD180, CD27, CD28, CD40, CD69, CD72, CD80, CD84, CDH17, CDKN1A, CDKN2B, Cmah, CNR2, CXCR4, DAPP1, DCLRE1C, DLK1, DOCK8, ESR1, ESR2, FCER1G, FCGR1A, FCGR2A, FCGR2B, FCMR, FES, FLT3, FOS, FZD9, H2AFX, HCLS1, HGF, ICOS, IGF2, IKZF3, IL17C, IL18, IL1RL1, IL21R, IL2RB, IL2RG, IL6…	141		Hematological System Development and Function	stimulation	stimulation of leukocytes	6.76e-16	ADORA1, ANGPT1, BTLA, C3, C5AR1, CCL2, CCL5, CD1D, CD2, CD274, CD28, CD3E, CD4, CD40, CD5, CD69, CD74, CD80, CD83, CD86, CHRNA1, CLEC4E, CLEC4M, CXCL10, CXCL11, HAVCR2, HLA-G, HMOX1, ICOS, IGF2, IL10, IL12B, IL18, IL1B, IL1RN, IL4R, IRF6, ITK, KLRC1, KLRD1, Klrk1, LCN2, LEP, LGALS3, LIF, LILRB4, MSLN, NOS2, PDCD1, PF4, PTPRC, SPN, STEAP1, TLR2, TLR3, TLR4, TLR9, TNF, TNFRSF18, TNFRSF1B, TNFSF11, …	63
Immune Cell Trafficking	migration	T cell migration	1.41e-19	Abcb1b, ACKR2, ACKR3, ACTB, ADAM17, AGT, AOC3, APP, ARRB2, BATF, C3, CAMP, Ccl2, CCL2, CCL20, CCL21, CCL22, CCL24, CCL3L3, CCL4, CCR3, CCR4, CCR6, CCR7, CCR9, CD274, CD40, CD44, CD80, CD86, CEACAM1, COL1A1, COL4A3, CTSS, CTSV, CXCL10, CXCL11, CXCL13, CXCL16, CXCR3, CXCR4, CYSLTR1, DIAPH1, DOCK8, DPP4, EGR2, ENPP2, ESR2, EZR, F2RL1, FAM65B, FAS, FOXO1, FOXP3, FUT4, FUT7, FYB, GATA3, GRK6, HGF, HLA…	129		Hematological System Development and Function	migration	Lymphocyte migration	2.06e-28	Abcb1b, ACKR2, ACKR3, ACTB, ADAM17, AGT, ANXA1, AOC3, ARRB2, BATF, BCL11B, BTK, C3, C6, CCL17, CCL19, Ccl2, CCL2, CCL21, CCL22, CCL3L3, CCL4, CCL5, Ccl6, CCR3, CCR6, CCR7, CCR9, CD1D, CD2, CD209, CD22, CD226, CD247, CD28, CD3E, CD4, CD40, CD44, CD69, CD80, CD86, CD8A, CMKLR1, COL1A1, COL4A3, CTLA4, CTSS, CTSV, CX3CR1, CXCL10, CXCL11, CXCL13, CXCL16, CXCL3, CXCR3, CXCR4, CXCR5, CYSLTR1, CYTIP, DOC…	183		Tissue Morphology	quantity	quantity of antigen presenting cells	6.45e-23	ABCA1, ADA, ADIPOQ, AGT, APOE, BATF3, BCL11A, BCL2L11, BCL3, BDNF, BID, BIRC3, C5AR1, CCL19, Ccl2, CCL2, CCL21, CCL22, Ccl9, CCR4, CCR6, CCR7, CD200R1, CD40, CD83, CDKN2B, CES1, CIITA, CLEC4D, CLEC4E, CSF1R, CTSS, CTSV, CX3CR1, CXCL10, CXCL14, CXCR6, DDR1, DOCK8, F2RL1, FCER1G, FCGR2B, FGF7, FLT3, GHR, GPR132, GPR68, GREM1, HAVCR2, HCK, HSD11B1, IL11, IL12RB2, IL18, IL1A, IL1B, IL1R1, IL1RL1, IL1…	116		Hematological System Development and Function	stimulation	stimulation of mononuclear leukocytes	1.35e-13	ANGPT1, BTLA, C3, CCL2, CD1D, CD2, CD274, CD28, CD3E, CD4, CD40, CD5, CD69, CD74, CD80, CD83, CD86, CHRNA1, CLEC4E, CXCL10, CXCL11, HAVCR2, HLA-G, HMOX1, ICOS, IL10, IL12B, IL18, IL1RN, IRF6, ITK, KLRC1, KLRD1, Klrk1, LCN2, LEP, LILRB4, MSLN, NOS2, PDCD1, PTPRC, SPN, STEAP1, TNF, TNFRSF18, TNFRSF1B, TNFSF11, TNFSF13, TNFSF15	49
Immune Cell Trafficking	migration	migration of antigen presenting cells	9.21e-18	ADIPOQ, AGT, ALCAM, APOE, AR, C3, Ccl2, CCL2, CCL20, CCL21, CCL22, CCL3L3, CCL4, Ccl9, CCND1, CCR7, CD209, CD38, CD40, CD44, CD80, CD86, CDH1, CEACAM1, CLEC1B, CMKLR1, CSF1R, CTSZ, CXCL10, CXCL11, CXCL13, CXCR3, CXCR4, CYBB, DOCK8, ENG, HCLS1, HGF, HIF1A, ICAM1, ICAM2, ICOS, IL10, IL10RA, IL16, IL18, IL1B, IL1RN, IL21R, ITGA1, ITGA5, ITGAL, LGALS3, MAPKAPK2, MDK, MMP12, MST1, MYLK, NLRP10, NLRP12…	92		Hematological System Development and Function	migration	migration of phagocytes	3.51e-24	ABCA1, ADAM17, ADIPOQ, AGT, ALCAM, ANGPT1, ANXA1, ANXA2, AOC3, APOE, AR, C3, CCL17, CCL19, Ccl2, CCL2, CCL21, CCL22, CCL3L3, CCL4, CCL5, Ccl9, CCND1, CCR7, CD209, CD38, CD40, CD44, CD80, CD86, CDH1, CEBPE, CLEC11A, CLEC4M, CMKLR1, COL1A1, CSF1R, CTSS, CTSV, CTSZ, CX3CR1, CXCL10, CXCL11, CXCL13, CXCL2, CXCL3, CXCL6, CXCR3, CXCR4, CYBB, DDR2, DOCK8, F10, FASLG, FGR, FN1, Gm21596/Hmgb1, GREM1, HCK, …	146		Tissue Morphology	quantity	quantity of CD4+ T-lymphocytes	1.86e-22	ANPEP, APOE, ATM, BATF, BCL2L11, BMF, Ccl2, CCL5, CCR6, CCR7, CD247, CD28, CD3D, CD4, CD40, CD5, CD69, CD83, CD84, CD8A, CDKN2A, CIITA, CORO1A, CTSV, CXCL10, DCLRE1C, DOCK8, ENTPD7, ESR1, ESR2, GPR83, GRAP, HLA-A, ICOS, IL13RA1, IL17RA, IL21R, IL2RB, IL2RG, IRF1, ITGAM, ITGB2, ITGB7, ITK, JAK3, LAG3, LAIR1, LAT, LCK, LCP2, MMP19, Mt1, NOD2, NPY1R, PIK3CD, PRF1, PRKCQ, PTPN2, PTPN6, PTPRC, RASGRP1…	78		Hematological System Development and Function	generation	generation of lymphocytes	3.31e-15	ADA, ADCY7, AHR, ARG1, C3, CD27, CD28, CD4, CD40, CD5, CD69, CD80, CD83, CD86, CXCL10, CXCR3, DBH, DOK1, HLA-A, HLA-DQB1, ICOS, IL10, IL10RA, IL12B, IL18, IL1B, IL1RN, IL21R, IL2RG, IL4R, IL7R, IRF4, ITGA4, ITK, JAK3, LEP, LFNG, LTBP1, NFIL3, PGR, PRDM1, PRKCQ, PSMB8, PSMB9, PTPN6, RBL1, SOCS3, SPP1, STAT4, TBX21, TLR4, TNF, TNFSF15	53
Immune Cell Trafficking	migration	migration of myeloid cells	2.88e-17	ADAM17, ADORA1, ANXA1, AOC3, C3, CAMP, Ccl2, CCL2, CCL24, CCL3L3, CCL4, CCR3, CD44, CEACAM1, CEBPE, CLEC11A, CXCL10, CXCL11, CXCL2, CXCL3, CXCL6, CXCR2, CYBB, DDR2, ENG, F10, FAS, FGR, FPR1, Gm21596/Hmgb1, HCK, HMOX1, ICAM1, ICAM2, IL16, IL17RA, IL18, IL1B, IL33, IL6, INPP5D, ITGA4, ITGAL, ITGAM, ITGB2, LEP, LGALS1, LSP1, MAPKAPK2, MDK, MMP9, MYD88, MYLK, MYLK3, NLRP12, NLRP3, NOS2, P2RY6, PARP1,…	86		Hematological System Development and Function	migration	T cell migration	2.44e-23	Abcb1b, ACKR2, ACKR3, ACTB, ADAM17, AGT, AOC3, ARRB2, BATF, BCL11B, C3, C6, CCL17, CCL19, CCL2, Ccl2, CCL21, CCL22, CCL3L3, CCL4, CCL5, CCR3, CCR6, CCR7, CCR9, CD28, CD4, CD40, CD44, CD69, CD80, CD86, COL1A1, COL4A3, CTLA4, CTSS, CTSV, CXCL10, CXCL11, CXCL13, CXCL16, CXCR3, CXCR4, CXCR5, CYSLTR1, DOCK8, EGR2, ENPP2, ESR2, EZR, F2RL1, FAM65B, FASLG, FN1, FOXO1, FUT4, FUT7, FYB, GATA3, GRK6, HGF, H…	135		Tissue Morphology	quantity	quantity of thymocytes	2.66e-20	ABCB1, Abcb1b, AHR, ATM, BCL11A, BCL11B, BCL2L11, BMF, CASP3, CBFB, CCNB2, CCR6, CCR7, CCR9, CD244, CD247, CD3E, CD3G, CD4, CD5, CD5L, CD7, CD80, CD86, CD8A, CD8B, CDKN2A, CIITA, CORO1A, CTSD, CTSE, CXCR4, DCLRE1C, DNASE2, DOK1, ESR1, ESR2, FADD, FCER1G, FCGR2B, FOS, FOSB, FOXO1, FYB, GADD45A, IL2RB, IL2RG, IL6, IL7R, INPP5D, Ins1, IRF1, ITGB2, ITK, ITPKB, JAK3, LAG3, LAIR1, LAT, LCK, LCP2, LEP, …	101		Hematological System Development and Function	generation	generation of T lymphocytes	3.78e-14	ADA, ADCY7, AHR, ARG1, CD27, CD28, CD4, CD40, CD5, CD80, CD83, CD86, CXCL10, CXCR3, DBH, DOK1, HLA-A, HLA-DQB1, ICOS, IL10, IL10RA, IL12B, IL1B, IL21R, IL2RG, IL4R, ITGA4, ITK, JAK3, LEP, LFNG, LTBP1, PGR, PRKCQ, PSMB8, PSMB9, PTPN6, RBL1, SOCS3, SPP1, STAT4, TBX21, TLR4, TNF, TNFSF15	45
Immune Cell Trafficking	migration	migration of granulocytes	1.8e-15	ADORA1, ANXA1, AOC3, C3, CAMP, Ccl2, CCL2, CCL24, CCL3L3, CCL4, CCR3, CD44, CEACAM1, CEBPE, CLEC11A, CXCL10, CXCL11, CXCL2, CXCL3, CXCL6, CXCR2, CYBB, DDR2, ENG, F10, FAS, FGR, FPR1, Gm21596/Hmgb1, HCK, ICAM1, ICAM2, IL16, IL17RA, IL18, IL1B, IL33, IL6, INPP5D, ITGAL, ITGAM, ITGB2, LEP, LGALS1, LSP1, MAPKAPK2, MMP9, MYD88, MYLK, MYLK3, NLRP12, NLRP3, NOS2, PDE4B, PIK3CD, PIK3R1, PIK3R5, PLAU, PLA…	75		Hematological System Development and Function	migration	migration of antigen presenting cells	5.26e-16	ADIPOQ, AGT, ALCAM, APOE, AR, C3, CCL17, CCL19, CCL2, Ccl2, CCL21, CCL22, CCL3L3, CCL4, CCL5, Ccl9, CCND1, CCR7, CD209, CD38, CD40, CD44, CD80, CD86, CDH1, CLEC4M, CMKLR1, CSF1R, CTSZ, CXCL10, CXCL11, CXCL13, CXCR3, CXCR4, CYBB, DOCK8, HCLS1, HGF, HIF1A, ICAM1, ICOS, IL10, IL10RA, IL16, IL18, IL1B, IL1RN, IL21R, IRF6, ITGA1, ITGAL, KIT, LGALS3, MMP12, MST1, MYLK, NLRP10, NPM1, NTN1, P2RY6, PARP1,…	88		Tissue Morphology	quantity	quantity of neutrophils	1.29e-19	ADA, ADAM17, ADIPOQ, AHR, ARNTL, C1QA, C3, C5AR1, C5AR2, C6, Ccl2, CCL2, CCL3L3, CCR4, CD1D, CD300A, CD40, CERK, CFH, CLEC4E, CLEC7A, CNR2, CSF3R, CYBB, CYP1A1, DOK1, ESR2, F2RL1, FASLG, FCGR1A, FCGR2A, FCGR2B, FES, FUT4, FUT7, FZD9, GPR132, GSN, HDC, ICAM1, IL17RA, IL18, IL18BP, IL1A, IL1B, IL1R1, IL2RB, IL2RG, IL6, INPP5D, IRF6, ITGAL, ITGAM, ITGB2, JAK3, KERA, LCN2, LEP, LYN, MDK, MMP12, MMP13…	97		Hematological System Development and Function	formation	formation of lymphocytes	6.84e-15	BBC3, BCL11B, BCL2L11, BIRC5, CBFB, CCR9, CD3D, CD3E, CD3G, CD74, CD83, CDKN2A, CXCR4, DKK1, DOCK8, EGR2, IL10, IL21R, IL2RB, IL2RG, IL7R, IRF1, JAK3, Klra4 (includes others), LAT, LAT2, LAX1, LCP2, LTB, LYN, MLLT11, NFIL3, PDCD1, PIK3CD, PIM1, PTPRC, RASGRP1, RASGRP4, SATB1, SIT1, SOCS1, SPI1, SPIB, SYK, THEMIS2, TRAT1, TYROBP, WT1, ZAP70	49
Immune Cell Trafficking	cell movement	cell movement of leukocytes	4.45e-53	ABCA1, Abcb1b, ABCB4, ACKR2, ACKR3, ACTB, ADA, ADAM17, ADIPOQ, ADORA1, ADRB3, ADRBK1, AGT, AIF1, ALCAM, ALOX5AP, ANXA1, ANXA2, AOC3, APOE, APP, AQP9, AR, ARG1, ARRB2, B4GALT1, BATF, BGN, BID, BTK, C1QBP, C2, C3, C4A/C4B, C5AR1, C5AR2, CAMK1D, CAMP, CAPG, CASP1, CASR, CBFB, Ccl2, CCL2, CCL20, CCL21, CCL22, CCL24, CCL3L3, CCL4, Ccl6, Ccl9, CCND1, CCR3, CCR4, CCR6, CCR7, CCR9, CD14, CD1D, CD2, CD209…	417		Hematological System Development and Function	migration	migration of myeloid cells	2.7e-13	ADAM17, ADORA1, ANXA1, AOC3, C3, CCL17, CCL2, Ccl2, CCL3L3, CCL4, CCL5, CCR3, CD44, CEBPE, CLEC11A, CXCL10, CXCL11, CXCL2, CXCL3, CXCL6, CYBB, DDR2, F10, FASLG, FGR, FN1, Gm21596/Hmgb1, HCK, HMOX1, ICAM1, IL16, IL17RA, IL18, IL1B, IL6, INPP5D, ITGA4, ITGAL, ITGAM, ITGB2, LAMA5, LEP, LGALS1, LSP1, MMP7, MMP9, MYD88, MYLK, MYLK3, NLRP3, P2RY6, PARP1, PDE4B, PIK3CD, PIK3R1, PIK3R5, PLAU, PLAUR, PLCB…	78		Tissue Morphology	quantity	quantity of macrophages	5.57e-15	ABCA1, ADA, ADIPOQ, AGT, APOE, BCL2L11, BCL3, BID, BIRC3, C5AR1, Ccl2, CCL2, CCL22, CCR4, CCR6, CD200R1, CD40, CES1, CSF1R, CTSS, CTSV, CX3CR1, CXCL10, CXCL14, CXCR6, DDR1, FGF7, GHR, GPR132, GPR68, GREM1, HAVCR2, HCK, HSD11B1, IL11, IL12RB2, IL18, IL1A, IL1B, IL1R1, IL1RL1, IL2RG, IRF8, ITGB2, JAK2, LCN2, LEPR, LGALS3, LIF, LILRB4, LIPG, LSP1, LTC4S, MDK, MIF, MMP12, MMP3, MMP9, MPZ, Mt1, NOS1, …	78		Hematological System Development and Function	formation	formation of thymocytes	1.57e-14	BBC3, BCL11B, BCL2L11, BIRC5, CBFB, CCR9, CD3D, CD3E, CD3G, CD74, CD83, CDKN2A, CXCR4, DKK1, EGR2, IL10, IL2RB, IL2RG, IL7R, IRF1, JAK3, Klra4 (includes others), LAT, LAT2, LAX1, LCP2, MLLT11, PDCD1, PIM1, PTPRC, RASGRP1, RASGRP4, SATB1, SIT1, SOCS1, SPI1, SPIB, SYK, THEMIS2, TRAT1, TYROBP, WT1, ZAP70	43
Immune Cell Trafficking	cell movement	cell movement of phagocytes	4.45e-41	ABCA1, ADAM17, ADIPOQ, ADORA1, ADRB3, ADRBK1, AGT, AIF1, ALCAM, ALOX5AP, ANXA1, ANXA2, AOC3, APOE, APP, AQP9, AR, ARG1, B4GALT1, BID, BTK, C1QBP, C2, C3, C4A/C4B, C5AR1, C5AR2, CAMK1D, CAMP, CAPG, CASP1, CASR, CCL2, Ccl2, CCL20, CCL21, CCL22, CCL24, CCL3L3, CCL4, Ccl9, CCND1, CCR3, CCR6, CCR7, CD14, CD209, CD38, CD40, CD44, CD80, CD86, CD9, CDH1, CDKN1A, CEACAM1, CEBPE, CES1, CFB, CFH, CKLF, CLEC…	300		Hematological System Development and Function	homing	homing of leukocytes	3.7e-30	ACKR2, ACKR3, ADAM17, ADORA1, AIF1, ANGPT1, ANXA1, AOC3, APOE, AQP9, B4GALT1, BATF, C3, C5AR1, C5AR2, CAMK1D, CAPG, CCL17, CCL19, Ccl2, CCL2, CCL21, CCL22, CCL3L3, CCL4, CCL5, CCND1, CCR3, CCR6, CCR7, CCR9, CD28, CD38, CD4, CD44, CD69, CD9, CDKN1A, CKLF, CMKLR1, CNR2, CORO1A, CSF1R, CSF2RA, CSF3R, CST3, CTSE, CX3CR1, CXADR, CXCL10, CXCL11, CXCL13, CXCL14, CXCL16, CXCL2, CXCL3, Cxcl3, CXCL6, CXCR1…	201		Tissue Morphology	quantity	quantity of lymphatic system cells	9.22e-14	ABCB1, Abcb1b, ABCG2, AHR, ALCAM, ALDH1A2, APOE, ARNTL, ATM, BCL2A1, BCL2L11, BCL3, BCL6, BIRC5, BLNK, BMF, BRCA2, CASP8, CD180, CD1D, CD40, CD44, CD72, CD80, CD84, CD9, CDH17, CDKN1A, CDKN2A, CIB1, CLEC11A, Cmah, CNR2, CSF3R, CXCR4, DCLRE1C, DLK1, DOCK8, DOK1, ESR1, ESR2, FCMR, FES, FGF4, FOS, FUT7, HCK, ICOS, IKZF3, IL1A, IL1RL1, IL2RG, IL6, IL7R, INPP5D, IRF8, ITGB2, ITK, JAK3, KIAA0101, KLHL6…	101		Hematological System Development and Function	formation	formation of hematopoietic progenitor cells	2.3e-14	BBC3, BCL11B, BCL2L11, BIRC5, CBFB, CCR9, CD3D, CD3E, CD3G, CD74, CD83, CDKN2A, CXCR4, DKK1, EGR2, IL10, IL2RB, IL2RG, IL7R, INHBA, IRF1, IRF8, JAK2, JAK3, Klra4 (includes others), LAT, LAT2, LAX1, LCP2, MLLT11, MYL9, PDCD1, PIM1, PTPRC, RASGRP1, RASGRP4, SATB1, SIT1, SOCS1, SPI1, SPIB, STAT1, SYK, THEMIS2, TRAT1, TYROBP, WT1, ZAP70	48
Immune Cell Trafficking	cell movement	cell movement of myeloid cells	1.24e-39	ABCA1, ADAM17, ADIPOQ, ADORA1, ADRB3, ADRBK1, AGT, AIF1, ALOX5AP, ANXA1, ANXA2, AOC3, APOE, APP, AQP9, AR, ARG1, ARRB2, B4GALT1, BID, BTK, C1QBP, C2, C3, C4A/C4B, C5AR1, C5AR2, CAMK1D, CAMP, CAPG, CASP1, CASR, CBFB, CCL2, Ccl2, CCL20, CCL21, CCL22, CCL24, CCL3L3, CCL4, CCND1, CCR3, CCR6, CCR7, CD14, CD2, CD44, CD9, CDKN1A, CEACAM1, CEBPE, CES1, CFB, CFH, CKLF, CLEC11A, CMKLR1, CNP, CNR2, COL1A1, …	292		Hematological System Development and Function	homing	homing of neutrophils	4.12e-17	ADORA1, AQP9, C3, C5AR1, C5AR2, CAMK1D, CAPG, CCL19, CCL2, Ccl2, CCL21, CCL3L3, CCL4, CCL5, CCR6, CCR7, CD28, CD69, CKLF, CORO1A, CSF2RA, CSF3R, CST3, CXADR, CXCL10, CXCL14, CXCL2, Cxcl3, CXCL3, CXCL6, CXCR1, ELANE, FASLG, FCER1G, FCGR2A, FGR, GRK6, GRN, GSN, HCK, ICAM1, IL18, IL1B, IL1R1, INPP5D, ITGA1, ITGA4, ITGAM, ITGB2, LBP, LCN2, LGALS3, LSP1, LYN, MYO1F, NCKAP1L, NOD2, PDE4B, PENK, PF4, PI…	90		Tissue Morphology	quantity	quantity of CD8+ T lymphocyte	1.2e-13	ATM, BATF, BCL11A, BCL11B, BCL2L11, BMF, CCR4, CCR6, CD247, CD28, CD3D, CD4, CD5, CD8A, CD8B, CDKN2A, CIITA, CORO1A, CXCL10, DCLRE1C, DOCK8, ESR1, ESR2, HLA-A, IL2RB, IL2RG, IRF1, ITGAM, ITGB2, ITK, JAK3, LAG3, LAIR1, LCK, LCP2, MMP19, MPZL2, Mt1, NDST3, NPY1R, P2RX5, PIK3CD, PRF1, PRKCQ, PSMB10, PSMB8, PSMB9, PTPN6, PTPRC, RASGRP1, RHOH, SIGLEC1, SPI1, ST8SIA1, TAP1, TNF, TXK, VAV1, VAV2, ZBTB7B	60		Hematological System Development and Function	maturation	maturation of lymphocytes	9.44e-15	ABCG1, ADAM17, AHR, ATM, BIRC5, BLNK, BTK, BTLA, CADM1, CD247, CD28, CD3E, CD4, CD40, CD80, CD86, HLA-DRA, ICOS, IL10, IL18, IL1A, IL21R, IL7R, IRF4, ITK, Klra4 (includes others), LAT, LCK, LCP1, MAP3K14, MAPK3, NFIL3, PARP14, PIK3CD, PLCG2, PRDM1, PTPN6, PTPRC, RASGRP1, RHOH, RUNX1, SELL, Slfn2, TBX21, TNF, TNFSF11, TNFSF13, TXK, TYROBP, VAV1, VAV2	51
Immune Cell Trafficking	cell movement	cell movement of granulocytes	2.75e-31	ADAM17, ADIPOQ, ADORA1, ADRB3, ADRBK1, AGT, ALOX5AP, ANXA1, AOC3, APOE, APP, AQP9, ARRB2, B4GALT1, BTK, C1QBP, C2, C3, C4A/C4B, C5AR1, C5AR2, CAMK1D, CAMP, CAPG, CASP1, CBFB, CCL2, Ccl2, CCL21, CCL24, CCL3L3, CCL4, CCR3, CCR6, CCR7, CD14, CD2, CD44, CEACAM1, CEBPE, CFB, CFH, CKLF, CLEC11A, CMKLR1, CORO1A, CSF2RA, CSF3R, CSK, CST3, CTSB, CXCL10, CXCL11, CXCL14, CXCL2, Cxcl3, CXCL3, CXCL6, CXCR2, C…	204		Hematological System Development and Function	homing	homing of granulocytes	2.38e-16	ADORA1, ANXA1, AQP9, C3, C5AR1, C5AR2, CAMK1D, CAPG, CCL19, Ccl2, CCL2, CCL21, CCL3L3, CCL4, CCL5, CCR3, CCR6, CCR7, CD28, CD69, CKLF, CORO1A, CSF2RA, CSF3R, CST3, CXADR, CXCL10, CXCL14, CXCL2, CXCL3, Cxcl3, CXCL6, CXCR1, CXCR3, ELANE, FASLG, FCER1G, FCGR2A, FGR, GRK6, GRN, GSN, HCK, ICAM1, IL10, IL18, IL1B, IL1R1, INPP5D, ITGA1, ITGA4, ITGAM, ITGB2, LBP, LCN2, LGALS1, LGALS3, LSP1, LYN, MYO1F, N…	100		Tissue Morphology	quantity	quantity of regulatory T lymphocytes	2.81e-13	ADIPOQ, BATF, BCL2L11, CAMK4, CCL19, CCL21, CCL4, CCL5, CD1D, CD27, CD28, CD5, CD80, CD86, CTSV, CXCR3, EBI3, FABP5, FASLG, FCGR2B, FLT3, ICOS, IL2RB, IL7R, ITGB2, ITGB8, Klrk1, LEP, LEPR, LTB, MDK, MIF, PDCD1, PRKCQ, PTAFR, PTPN22, SELE, SELL, SELP, SELPLG, TGFBR1, THBS1, TLR2, TLR9, TNF, TNFRSF1B, TNFSF15, WAS, XCL1	49		Hematological System Development and Function	cell rolling	cell rolling of leukocytes	2.05e-14	ADAM17, ANXA1, BTK, CCL17, CCL2, CCR7, CD14, CD44, CHST1, CXCR1, F2RL1, FCGR2A, FCGR3A/FCGR3B, FGR, FUT7, FYB, HCK, ICAM1, IL1B, ITGA4, ITGAL, ITGAM, ITGB2, ITGB7, LCP2, LGALS3, LYN, PRKCQ, RAC2, SELE, SELL, SELP, SELPLG, SPN, TLR4, TNF	36
Immune Cell Trafficking	cell movement	cell movement of mononuclear leukocytes	1.16e-30	ABCA1, Abcb1b, ACKR2, ACKR3, ACTB, ADAM17, AGT, AIF1, ANXA1, ANXA2, AOC3, APOE, APP, ARRB2, BATF, BGN, BTK, C3, CAMP, CASR, CBFB, CCL2, Ccl2, CCL20, CCL21, CCL22, CCL24, CCL3L3, CCL4, Ccl6, CCR3, CCR4, CCR6, CCR7, CCR9, CD1D, CD2, CD209, CD22, CD226, CD247, CD274, CD40, CD44, CD80, CD86, CD8A, CEACAM1, CHST4, CIITA, CKLF, CMKLR1, CNR2, COL1A1, COL4A3, CTSS, CTSV, CX3CR1, CXCL10, CXCL11, CXCL13, C…	240		Hematological System Development and Function	homing	homing of mononuclear leukocytes	1.22e-15	ACKR2, ACKR3, ADAM17, AIF1, ANGPT1, ANXA1, AOC3, BATF, CCL17, CCL19, Ccl2, CCL2, CCL21, CCL22, CCL4, CCL5, CCR3, CCR6, CCR7, CCR9, CD44, CKLF, CNR2, CXCL10, CXCL11, CXCL13, CXCL16, CXCL3, CXCR1, CXCR3, CXCR4, CXCR5, CYSLTR1, ELN, ENPP2, F2R, FN1, FOXO1, FUT7, FYB, GATA3, GNA13, GNAO1, GNAZ, HEBP1, HLA-G, HP, IL10, IL16, IL1B, IL21, INHBA, ITGA4, ITGAL, ITGB7, ITK, JAK2, JAK3, LAT, LCP1, LGALS1, L…	103		Tissue Morphology	quantity	quantity of double-positive thymocyte	1.4e-12	ABCB1, Abcb1b, ATM, BCL11B, BCL2L11, CCR6, CCR9, CD247, CD3E, CD4, CD5, CD7, CD80, CD86, CD8A, CDKN2A, CIITA, CTSD, CTSE, CXCR4, DCLRE1C, DNASE2, ESR1, ESR2, FOS, IL2RB, IL2RG, IL7R, IRF1, ITGB2, ITK, ITPKB, LAT, LCK, LCP2, MMP19, PIK3CD, PRKCQ, PTPN2, PTPRC, RHOH, RUNX1, SASH3, SPI1, ST14, VAV1, VAV3, WAS, ZAP70	49		Hematological System Development and Function	cell viability	cell viability of lymphocytes	3.81e-14	BBC3, BCL2L11, BTK, BTLA, C3, CACNB3, CASP8, CBFB, CD28, CD3E, CD40, CD44, CD74, CD80, CD86, CD8A, CISH, DLK1, DOCK8, FCGR3A/FCGR3B, HCK, HGF, HSH2D, ICOS, IKZF2, IL10, IL21R, IL2RB, IL2RG, IL7R, INPP5D, ITGAL, JAK3, LAT, LAX1, LEP, LGALS3, MAPK3, MYH11, NCF2, NFIL3, NGF, PARP14, PDCD1, PIK3CB, PIK3CD, PIM1, PLCG2, PRDM1, PRKCQ, PTK2B, PTPRC, SEMA4D, SPN, STAT1, STAT4, SYK, TBX21, TLR9, TNF, TNFR…	64
Immune Cell Trafficking	cell movement	cell movement of neutrophils	2.25e-29	ADAM17, ADIPOQ, ADORA1, ADRB3, ADRBK1, AGT, ALOX5AP, ANXA1, APOE, APP, AQP9, B4GALT1, BTK, C1QBP, C2, C3, C4A/C4B, C5AR1, C5AR2, CAMK1D, CAMP, CAPG, CASP1, Ccl2, CCL2, CCL21, CCL24, CCL3L3, CCL4, CCR6, CCR7, CD14, CD44, CEBPE, CFB, CFH, CKLF, CMKLR1, CORO1A, CSF2RA, CSF3R, CST3, CTSB, CXCL10, CXCL14, CXCL2, Cxcl3, CXCL3, CXCL6, CXCR2, CYBB, DDR2, F10, F2RL1, FABP4, FAS, FCER1G, FCGR2A, FGR, FPR1,…	168		Hematological System Development and Function	adhesion	adhesion of immune cells	1.09e-29	A2M, ADAM17, ADGRE5, ADIPOQ, ADORA1, AGT, ALCAM, ALOX12, ALOX15, ANGPT1, ANXA1, AOC3, APOE, B4GALT1, BDKRB1, BTK, C1QA, C3, CACNA1C, CCL17, CCL19, Ccl2, CCL2, CCL21, CCL22, CCL3L3, CCL4, CCL5, CCNC, CCND1, CCR3, CCR7, CD14, CD2, CD200R1, CD209, Cd24a, CD28, CD300LD, CD38, CD4, CD40, CD44, CD6, CD69, CD83, CD9, CDH1, CLEC10A, CLEC4M, Cmah, CNR1, CNR2, CORO1A, CR2, CSF2RB, CSF3R, CTSZ, CX3CR1, CXCL…	189		Tissue Morphology	quantity	quantity of connective tissue cells	1.82e-12	ADIPOQ, ADRB1, AHR, ARNTL, ATG7, ATM, ATP2B2, C3, C5AR1, CAMK4, CBFB, Ccl2, CCL2, CD44, CD9, CDKN1A, CDKN2A, CLCN7, COL1A1, COL4A3, CTSV, CYP27B1, DBH, ESR1, ESR2, F2R, FARP2, FASLG, FGFR3, FLT3, FN1, FOS, FOSB, FZD9, GDNF, GGT1, GNRH1, GPX1, HCK, HDC, HSD11B1, HSD11B2, HTR1B, IDUA, IL1A, IL1R1, IL1RN, INPP5D, Ins1, KLF2, LIF, LIPE, LRRK1, LTC4S, MMP2, MMP7, MSR1, NOS1, NOS2, NPY, NPY1R, Npy4r, N…	85		Tissue Morphology	quantity	quantity of leukocytes	1.37e-82	ABCA1, ABCB1, Abcb1b, ABCG2, ADA, ADAM17, ADGRE5, ADIPOQ, AGR2, AGT, AHR, ALOX15, ALPL, ANPEP, APOB, APOE, ARNTL, ATF3, ATM, B3GNT5, B4GALT1, BACH2, BANK1, BATF, BATF3, BBC3, BCL11B, BCL2A1, BCL2L11, BDNF, BID, BIRC2, BIRC3, BIRC5, BLNK, BMF, BST1, Bst2, BTK, BTLA, C1QA, C3, C4A/C4B, C5AR1, C5AR2, C6, CASP8, CBFB, CCL19, Ccl2, CCL2, CCL21, CCL22, CCL3L3, CCL4, CCL5, Ccl7, Ccl9, CCR6, CCR7, CCR9, …	373
Immune Cell Trafficking	cell movement	cell movement of antigen presenting cells	1.29e-25	ACKR2, ADAM17, ADIPOQ, ADORA1, AGT, ALCAM, ANXA1, APOE, APP, AR, ARG1, B4GALT1, BID, C3, C5AR1, CAMP, CASP1, Ccl2, CCL2, CCL20, CCL21, CCL22, CCL24, CCL3L3, CCL4, Ccl9, CCND1, CCR3, CCR6, CCR7, CD209, CD38, CD40, CD44, CD80, CD86, CDH1, CDKN1A, CEACAM1, CES1, CKLF, CLEC1B, CMKLR1, CNP, CNR2, COL4A3, CSF1R, CTSE, CTSZ, CX3CR1, CXCL10, CXCL11, CXCL13, CXCL14, CXCR2, CXCR3, CXCR4, CYBB, DOCK8, EDNRB…	182		Hematological System Development and Function	adhesion	adhesion of mononuclear leukocytes	1.93e-15	AGT, ANXA1, AOC3, BTK, CCL17, CCL19, CCL2, CCL21, CCL22, CCL4, CCL5, CCR7, CD2, CD209, CD28, CD44, CXCL11, CXCR1, CXCR3, EZR, FAM65B, FERMT3, FN1, FOXO1, FUT4, FUT7, FYB, HGF, ICAM1, ICOS, IL10, IL11, IL1A, IL1B, IL6, ITGA4, ITGAL, ITGAM, ITGB2, ITK, JAK2, JAK3, LCP1, LIF, LIPG, Madcam1, MAP4K1, MYD88, NTN1, OSM, PLAU, PLAUR, PPARG, PPIB, PTPN6, RALGDS, RAP1GAP, RASGRP1, RASSF5, RGS1, SELE, SELL,…	78		Tissue Morphology	quantity	quantity of bone cells	5.51e-12	ADIPOQ, AHR, ARNTL, ATG7, C3, C5AR1, CAMK4, CBFB, Ccl2, CCL2, CD44, CD9, CLCN7, COL1A1, CTSV, CYP27B1, DBH, ESR1, ESR2, F2R, FARP2, FASLG, FGFR3, FLT3, FOS, FOSB, FZD9, GGT1, HCK, HDC, HSD11B1, HTR1B, IDUA, IL1A, IL1R1, IL1RN, INPP5D, LIF, LRRK1, MMP2, MMP7, MSR1, NOS1, NOS2, Npy4r, OSCAR, PDK4, PER1, PER2, PLCG2, PLCL2, POSTN, PSTPIP2, PTPN6, RGS10, RUNX2, SOST, SPARC, SPHK1, TNF, TNFSF11, TYROBP	62		Tissue Morphology	quantity	quantity of cells	1.17e-76	ABCA1, ABCB1, Abcb1b, ABCG2, ACVR1C, ADA, ADAM17, ADGRE5, ADIPOQ, ADRB1, AGR2, AGT, AHR, ALCAM, ALDH1A2, ALOX15, ALPL, ANPEP, ANXA1, APOA4, APOB, APOE, ARNTL, ARNTL2, ATF3, ATM, ATP2B2, AVPR1B, B3GNT5, B4GALT1, BACH2, BANK1, BATF, BATF3, BBC3, BCL11B, BCL2A1, BCL2L11, BDNF, BID, BIRC2, BIRC3, BIRC5, BLNK, BMF, BMP6, BMP7, BRINP1, BST1, Bst2, BTC, BTK, BTLA, C1QA, C3, C4A/C4B, C5AR1, C5AR2, C6, CA…	546
Immune Cell Trafficking	cell movement	cell movement of lymphocytes	7.4e-23	Abcb1b, ACKR2, ACKR3, ACTB, ADAM17, AGT, ANXA1, AOC3, APP, ARRB2, BATF, BGN, BTK, C3, CAMP, CBFB, CCL2, Ccl2, CCL20, CCL21, CCL22, CCL24, CCL3L3, CCL4, Ccl6, CCR3, CCR4, CCR6, CCR7, CCR9, CD1D, CD2, CD209, CD22, CD226, CD247, CD274, CD40, CD44, CD80, CD86, CD8A, CEACAM1, CHST4, CKLF, CMKLR1, CNR2, COL1A1, COL4A3, CTSS, CTSV, CX3CR1, CXCL10, CXCL11, CXCL13, CXCL16, CXCL3, CXCR3, CXCR4, CYSLTR1, CY…	194		Hematological System Development and Function	adhesion	adhesion of lymphocytes	1.83e-14	ANXA1, AOC3, BTK, CCL17, CCL19, CCL2, CCL21, CCL22, CCL4, CCR7, CD2, CD209, CD28, CD44, CXCL11, CXCR3, EZR, FAM65B, FERMT3, FN1, FUT4, FUT7, FYB, HGF, ICAM1, ICOS, IL11, IL1B, IL6, ITGA4, ITGAL, ITGB2, ITK, JAK2, JAK3, LIF, Madcam1, MAP4K1, MYD88, NTN1, OSM, PLAU, PPIB, PTPN6, RALGDS, RAP1GAP, RASGRP1, RASSF5, RGS1, SELE, SELL, SELP, SELPLG, SH2D1A, SIPA1, SKAP1, SPN, SPP1, TGFB1, THBS1, THBS2, T…	64		Tissue Morphology	size	size of lesion	6.87e-17	ACAT2, ADIPOQ, AGT, ANXA1, APOD, APOE, ARG2, BDNF, BID, BNIP3, C1QA, C3, CASP1, CAV3, Ccl2, CD4, CD40, CD44, CES1, CNR1, CNR2, CNTF, COL18A1, CRYAB, CST3, CTSS, CTSV, CX3CR1, CXCL3, DDR1, DUSP6, EPHX2, ESR2, F5, FAIM2, FASLG, FCER1G, FOXM1, FOXO1, GDNF, GPX1, GRN, GSN, HGF, HLA-A, HMOX1, ICAM1, IGF2, IL18, IL1A, IL1B, IL1R1, IL1RL1, IL1RN, IL6, Ins1, IRF1, ITGAM, LCAT, LEP, LGALS3, LIPE, MASP2, M…	101		Tissue Morphology	quantity	quantity of blood cells	7.84e-76	ABCA1, ABCB1, Abcb1b, ABCG2, ADA, ADAM17, ADGRE5, ADIPOQ, AGR2, AGT, AHR, ALOX15, ALPL, ANPEP, APOB, APOE, ARNTL, ATF3, ATM, B3GNT5, B4GALT1, BACH2, BANK1, BATF, BATF3, BBC3, BCL11B, BCL2A1, BCL2L11, BDNF, BID, BIRC2, BIRC3, BIRC5, BLNK, BMF, BST1, Bst2, BTK, BTLA, C1QA, C3, C4A/C4B, C5AR1, C5AR2, C6, CASP8, CBFB, CCL19, Ccl2, CCL2, CCL21, CCL22, CCL3L3, CCL4, CCL5, Ccl7, Ccl9, CCR6, CCR7, CCR9, …	393
Immune Cell Trafficking	cell movement	cell movement of T lymphocytes	1.05e-18	ACKR2, ACKR3, ADAM17, AGT, AOC3, APP, ARRB2, BATF, C3, CAMP, Ccl2, CCL2, CCL20, CCL21, CCL22, CCL24, CCL3L3, CCL4, CCR3, CCR4, CCR6, CCR7, CCR9, CD274, CD40, CD44, CD80, CD86, COL1A1, COL4A3, CTSS, CTSV, CXCL10, CXCL11, CXCL13, CXCL16, CXCR3, CXCR4, CYSLTR1, DIAPH1, DOCK8, DPP4, EGR2, ENPP2, ESR2, F2RL1, FAM65B, FAS, FOXO1, FOXP3, FUT4, FUT7, FYB, GATA3, HGF, HLA-A, HSPD1, ICAM1, ICOS, IFNAR1, IK…	116		Hematological System Development and Function	adhesion	adhesion of phagocytes	1.43e-13	ADAM17, ADORA1, ALCAM, ALOX12, ALOX15, ANXA1, BTK, CCL2, CCL5, CCND1, CD209, CD44, CDH1, CNR1, CORO1A, CR2, CSF3R, CTSZ, CXCL2, CXCL3, CXCR1, F2R, FERMT3, FN1, FOXO1, GLRX, HCK, HPSE, ICAM1, ICOS, IL10, IL1A, IL1B, IL6, INPP5D, Irgm1, ITGA4, ITGAL, ITGAM, ITGB2, ITGB7, KIT, LCP1, LIPG, LYN, PAK1, PF4, PIK3CD, PLA2G6, PLAU, PLAUR, PLTP, PPARG, PRKCQ, RAC2, S100A8, S100A9, SELE, SELL, SELP, SELPLG,…	72		Tissue Morphology	abnormal quantity	abnormal quantity of leukocytes	4.43e-15	APOE, BCL2L11, BCL3, BIRC3, CCR6, CCR9, CD247, CD4, CD80, CD86, CD8A, CSF1R, CXCL10, DLK1, ENTPD7, ESR1, ESR2, FCGR2A, FES, HMOX1, ICOS, IL1RN, IL2RG, IL6, IRF1, IRF8, ITGAM, JAK3, LCK, MR1, NOS2, NPY1R, PRDX1, PTPN2, PTPRC, RHOH, SELE, SELL, SELP, SERPINB2, SH3BP2, SIGLEC1, SPI1, SYK, TAP1, VAV1, ZBTB7B	47		Tissue Morphology	quantity	quantity of lymphocytes	6.08e-67	ABCB1, Abcb1b, ABCG2, ADA, ADIPOQ, AGT, AHR, ANPEP, APOE, ARNTL, ATM, B3GNT5, B4GALT1, BACH2, BANK1, BATF, BATF3, BBC3, BCL11B, BCL2A1, BCL2L11, BID, BIRC2, BIRC5, BLNK, BMF, BST1, Bst2, BTK, BTLA, C3, C5AR1, CASP8, CBFB, CCL19, CCL2, Ccl2, CCL21, CCL4, CCL5, CCR6, CCR7, CCR9, CD180, CD1D, CD244, CD247, CD27, CD274, CD28, CD3D, CD3E, CD3G, CD4, CD40, CD44, CD5, CD5L, CD69, CD7, CD72, CD74, CD80, …	291
Immune Cell Trafficking	cell movement	cell movement of macrophages	1.93e-18	ADAM17, ADIPOQ, AGT, ANXA1, APOE, APP, AR, ARG1, B4GALT1, BID, C3, CAMP, CASP1, Ccl2, CCL2, CCL21, CCL22, CCL3L3, CCL4, CCND1, CCR6, CD44, CDKN1A, CES1, CKLF, CMKLR1, CNP, CNR2, COL4A3, CSF1R, CTSE, CX3CR1, CXCL10, CXCR3, CXCR4, CYBB, EDNRB, EEF1A2, ELN, ENG, FCAR, GLRB, GSN, HCAR2, HGF, HIF1A, HMOX1, ICAM1, IKBKG, IL10, IL16, IL17C, IL17RA, IL18, IL1B, IL1RN, IL33, IL4R, Irgm1, ITGA1, ITGAL, ITG…	132		Hematological System Development and Function	accumulation	accumulation of blood cells	1.48e-28	ACKR2, ACKR3, ADGRE5, ADIPOQ, AGT, AHR, ANXA1, APOE, ARRB2, B2M, BCL2A1, BCL2L11, BCL3, C4A/C4B, C5AR1, C6, CASP8, CBS/CBSL, CCL17, CCL2, Ccl2, CCL21, CCL3L3, CCL5, Ccl7, CCR3, CCR7, CD1D, CD27, CD28, CD40, CD44, CD80, CD86, CEBPA, COL18A1, CRYAB, CTLA4, CTSC, CX3CR1, CXCL10, CXCL2, CXCL3, CXCR3, CXCR4, CYBB, DDR1, DEF6, DLX3, DOCK8, E2F1, ELANE, ENPP2, F2R, FADD, FAM132A, FASLG, FCGR2A, FCGR3A/F…	154		Tissue Morphology	abnormal quantity	abnormal quantity of lymphocytes	1.46e-11	APOE, BCL2L11, CCR6, CCR9, CD247, CD4, CD80, CD86, CD8A, CXCL10, DLK1, ENTPD7, ESR1, ESR2, ICOS, IL2RG, IL6, IRF1, IRF8, ITGAM, JAK3, LCK, MR1, NPY1R, PRDX1, PTPN2, PTPRC, RHOH, SELL, SH3BP2, SIGLEC1, SPI1, SYK, TAP1, VAV1, ZBTB7B	36		Tissue Morphology	quantity	quantity of mononuclear leukocytes	2.47e-65	ABCB1, Abcb1b, ABCG2, ADA, ADIPOQ, AGT, AHR, ANPEP, APOE, ARNTL, ATM, B3GNT5, B4GALT1, BACH2, BANK1, BATF, BATF3, BBC3, BCL11B, BCL2A1, BCL2L11, BID, BIRC2, BIRC5, BLNK, BMF, BST1, Bst2, BTK, BTLA, C3, C5AR1, CASP8, CBFB, CCL19, CCL2, Ccl2, CCL21, CCL4, CCL5, Ccl7, CCR6, CCR7, CCR9, CD180, CD1D, CD244, CD247, CD27, CD274, CD28, CD3D, CD3E, CD3G, CD4, CD40, CD44, CD5, CD5L, CD69, CD7, CD72, CD74, …	296
Immune Cell Trafficking	cell movement	cell movement of dendritic cells	9.23e-14	ADORA1, AGT, ALCAM, APOE, C3, C5AR1, Ccl2, CCL2, CCL20, CCL21, CCL22, CCL24, CCL3L3, CCL4, Ccl9, CCR3, CCR6, CCR7, CD209, CD38, CD40, CD44, CD80, CD86, CDH1, CEACAM1, CLEC1B, CMKLR1, CTSZ, CXCL10, CXCL11, CXCL13, CXCL14, CXCR2, CXCR3, CXCR4, DOCK8, FPR1, HCLS1, HEBP1, HIF1A, ICAM1, ICAM2, ICOS, IL10, IL10RA, IL11RA, IL16, IL17C, IL18, IL1A, IL1B, IL21R, IRAK4, ITGA5, NINJ1, NLRP10, NLRP12, NLRP3,…	80		Hematological System Development and Function	accumulation	accumulation of leukocytes	4.77e-27	ACKR2, ACKR3, ADGRE5, ADIPOQ, AGT, AHR, ANXA1, APOE, ARRB2, B2M, BCL2A1, BCL2L11, BCL3, C4A/C4B, C5AR1, C6, CASP8, CBS/CBSL, CCL17, CCL2, Ccl2, CCL21, CCL3L3, CCL5, Ccl7, CCR3, CCR7, CD1D, CD27, CD28, CD40, CD44, CD80, CD86, CEBPA, COL18A1, CRYAB, CTLA4, CTSC, CX3CR1, CXCL10, CXCL2, CXCL3, CXCR3, CXCR4, CYBB, DDR1, DEF6, DLX3, DOCK8, ELANE, ENPP2, F2R, FAM132A, FASLG, FCGR2A, FCGR3A/FCGR3B, FGF1,…	147		Tissue Morphology	abnormal morphology	abnormal morphology of lymph node	1.33e-14	ATM, B3GNT5, BCL3, CASP8, CCR6, CCR7, CCR9, CD247, CD40, CD80, CD86, CDKN1A, CIITA, CYP27B1, DCLRE1C, ESR1, ESR2, F2R, FASLG, FCGR2B, FOXC2, FUT4, FUT7, FZD9, HMOX1, ICOS, IL10RB, IL2RB, IL2RG, INPP5D, IRF8, ITGB2, JAK3, LAT, LIPA, LTB, LYN, MGAT2, NFKBIZ, NOD2, NOS2, NPY1R, PIK3CD, PLCD1, PRF1, PTPN2, PTPN22, PTPRCAP, RASSF5, RIPK3, RNF128, SATB1, SELE, SELL, SELP, SPHK1, TCIRG1, TK1, TNF, TNFRS…	65		Tissue Morphology	quantity	quantity of T lymphocytes	1.36e-52	ABCB1, Abcb1b, ABCG2, ADA, ADIPOQ, AGT, AHR, ANPEP, APOE, ATM, BACH2, BATF, BATF3, BBC3, BCL11B, BCL2A1, BCL2L11, BIRC5, BMF, Bst2, BTLA, C5AR1, CASP8, CBFB, CCL19, Ccl2, CCL21, CCL4, CCL5, CCR6, CCR7, CCR9, CD1D, CD244, CD247, CD27, CD274, CD28, CD3D, CD3E, CD3G, CD4, CD40, CD44, CD5, CD5L, CD69, CD7, CD74, CD80, CD83, CD84, CD86, CD8A, CD8B, CDKN2A, CHRNA1, CISH, CORO1A, CTSD, CTSE, CTSS, CTSV,…	222
Immune Cell Trafficking	cell movement	cell movement of monocytes	7.8e-12	ABCA1, ADAM17, AGT, AIF1, ANXA1, ANXA2, AOC3, APOE, APP, CAMP, CASR, Ccl2, CCL2, CCL20, CCL22, CCL4, CEACAM1, COL1A1, CTSS, CTSV, CX3CR1, CXCL10, CXCL3, CXCR2, CXCR4, ELN, ENG, F2R, FPR1, HEBP1, HGF, HP, ICAM1, IL10, IL1B, IL6, INHBA, ITGA4, ITGAL, ITGAM, ITGB2, LGALS1, LGALS3, MINOS1-NBL1/NBL1, MMP12, MMP9, MST1, NFKBIZ, NGF, NINJ1, NTN1, PF4, PLA2G6, PLA2G7, PLAUR, PLG, PRKCB, PRNP, PROK2, PTGD…	79		Hematological System Development and Function	accumulation	accumulation of myeloid cells	7.33e-18	ACKR3, ADGRE5, ADIPOQ, AGT, AHR, ANXA1, APOE, BCL2A1, C5AR1, C6, CBS/CBSL, CCL17, Ccl2, CCL2, CCL5, Ccl7, CCR3, CD28, CD40, CD44, CEBPA, COL18A1, CRYAB, CTSC, CX3CR1, CXCL10, CXCL2, CXCL3, DDR1, ELANE, F2R, FAM132A, FCGR2A, FCGR3A/FCGR3B, FGF1, FOSL1, GATA2, Gm21596/Hmgb1, GRN, HAVCR2, HDC, HMOX1, IFNAR1, IL10, IL11, IL12A, IL17RA, IL18, IL1B, IL1R1, IL1RN, INPP5D, IRF1, ITGA1, ITGA4, ITGA6, ITGA…	93		Tissue Morphology	morphology	morphology of lymph node	5.29e-14	ATM, B3GNT5, BCL3, CASP8, CCL21, CCR6, CCR7, CCR9, CD247, CD40, CD80, CD86, CDKN1A, CIITA, CYP27B1, DCLRE1C, ESR1, ESR2, F2R, FASLG, FCGR2B, FOXC2, FUT4, FUT7, FZD9, HMOX1, ICOS, IL10RB, IL2RB, IL2RG, INPP5D, IRF8, ITGB2, JAK3, LAT, LIPA, LTB, LYN, MAP3K14, MGAT2, NFKBIZ, NOD2, NOS2, NPY1R, PIK3CD, PLCD1, PRF1, PTPN2, PTPN22, PTPRCAP, RASSF5, RIPK3, RNF128, SATB1, SELE, SELL, SELP, SPHK1, TCIRG1,…	67		Tissue Morphology	quantity	quantity of phagocytes	1.66e-44	ABCA1, ADA, ADAM17, ADIPOQ, AGR2, AGT, AHR, APOB, APOE, ARNTL, ATF3, B4GALT1, BATF3, BCL2A1, BCL2L11, BID, BIRC3, C1QA, C3, C4A/C4B, C5AR1, C5AR2, C6, CCL19, CCL2, Ccl2, CCL21, CCL22, CCL3L3, Ccl7, Ccl9, CCR6, CCR7, CD1D, CD200R1, CD300A, CD40, CD83, CERK, CES1, CFH, CLEC4D, CLEC4E, CLEC7A, CNR2, CSF1R, CSF3R, CTSS, CTSV, CX3CR1, CXCL10, CXCL13, CXCR6, CYBB, CYP1A1, DDR1, DOCK8, DOK1, DOK2, ESR2,…	174
Immune Cell Trafficking	activation	activation of leukocytes	1.26e-33	ACE, ADA, ADIPOQ, ADORA1, ADRBK1, AGT, AHR, AICDA, ANXA1, ANXA2, APOE, APP, ARRB2, ATM, BANK1, BAX, BCL2L11, BCL3, BID, BLNK, BPI, BTK, C3, C4A/C4B, C5AR1, CAMP, CARD9, CASP1, CASP8, CASR, CCL2, Ccl2, CCL21, CCL22, CCL4, CCR7, CD14, CD163, CD180, CD19, CD1D, CD2, CD209, CD22, CD226, CD244, CD247, Cd24a, CD27, CD274, CD300A, CD300LB, CD300LD, CD300LF, CD37, CD38, CD3G, CD40, CD44, CD5, CD6, CD63, …	344		Hematological System Development and Function	accumulation	accumulation of phagocytes	7.33e-17	ACKR3, AGT, AHR, ANXA1, APOE, C5AR1, C6, CBS/CBSL, Ccl2, CCL2, CCL21, CCL5, CD28, CD40, CD44, COL18A1, CTSC, CX3CR1, CXCL10, CXCL2, CXCL3, DDR1, DOCK8, ELANE, F2R, FAM132A, FCGR2A, FCGR3A/FCGR3B, FGF1, FOSL1, Gm21596/Hmgb1, GRN, HAVCR2, HMOX1, IFNAR1, IL10, IL12A, IL17RA, IL18, IL1B, IL1R1, IL1RN, INPP5D, IRF1, ITGA1, ITGA4, ITGA6, ITGAM, ITGB2, KIT, LAMA5, LDLR, MAPK13, MMP3, MMP7, MMP9, MYD88, …	78		Tissue Morphology	morphology	morphology of connective tissue	1.18e-11	ABCA1, ABCG1, ACE, ACTA2, ADIPOQ, ADRA1B, ADRB1, ALPL, APOE, ARNTL, ARSB, ATP6V0D2, BCL11B, BIRC3, Ccl2, CD68, CDK4, CHSY1, CIDEC, CLCN2, CLCN3, CLCN7, COL11A2, COL1A1, COL2A1, COL9A1, CREB3L1, CSF1R, CSGALNACT1, CST3, CTSV, CXADR, CYP26A1, CYP26B1, DISP1, DLK1, DLX3, DOK1, ELN, EPB42, ERRFI1, ESR1, ESR2, F2R, FGFR3, FMOD, FN1, FOXC2, FUT8, GDF3, GHR, GPR65, GPR68, GSN, HBA1/HBA2, HGF, Hist1h1e, …	148		Tissue Morphology	quantity	quantity of antigen presenting cells	3.14e-33	ABCA1, ADA, ADIPOQ, AGT, APOB, APOE, BATF3, BCL2L11, BDNF, BID, BIRC3, C4A/C4B, C5AR1, CCL19, CCL2, Ccl2, CCL21, CCL22, Ccl9, CCR6, CCR7, CD200R1, CD40, CD83, CES1, CLEC4D, CLEC4E, CSF1R, CTSS, CTSV, CX3CR1, CXCL10, CXCL13, CXCR6, DDR1, DOCK8, F2RL1, FCER1G, FCGR2B, FLT3, GPR132, GPR68, GREM1, HAVCR2, HBEGF, HCK, HSD11B1, IL10, IL12B, IL12RB2, IL18, IL1A, IL1B, IL1R1, IL1RN, IL2RG, IL7R, INPP5D, …	115
Immune Cell Trafficking	activation	activation of phagocytes	1.82e-26	ACE, ADIPOQ, ADORA1, ADRBK1, AGT, AHR, ANXA1, ANXA2, APOE, APP, ARRB2, ATM, BID, BPI, BTK, C3, C4A/C4B, C5AR1, CAMP, CARD9, CASP1, CASR, Ccl2, CCL2, CCL21, CCL22, CCL4, CCR7, CD14, CD163, CD1D, CD209, CD226, Cd24a, CD300A, CD300LB, CD300LD, CD300LF, CD37, CD40, CD44, CD63, CD80, CD86, CD93, CEBPB, CEBPE, CERK, CFH, CHI3L1, CLCN7, CLEC4E, CLEC5A, CLEC7A, CNR2, CSF1R, CST3, CX3CR1, CXCL10, CXCL3, C…	191		Hematological System Development and Function	accumulation	accumulation of mononuclear leukocytes	1.13e-15	ACKR2, ADIPOQ, AGT, APOE, ARRB2, B2M, BCL2L11, BCL3, C4A/C4B, CASP8, CBS/CBSL, CCL17, CCL2, Ccl2, CCL21, CCL3L3, CCL5, CCR7, CD1D, CD27, CD28, CD40, CD80, CD86, CTLA4, CX3CR1, CXCL10, CXCL2, CXCL3, CXCR3, CXCR4, DEF6, DLX3, ENPP2, FASLG, ICAM1, ICOS, IFNAR1, IL10RA, IL11, IL17RA, IL18, IL21, IL21R, IL2RG, IL6, ITGA1, ITGAL, ITGB2, KLF2, LAT, MLLT11, MYD88, NT5E, PRKCQ, PTGDS, PTPN1, RASGRP1, RBPJ…	75		Tissue Morphology	deterioration	deterioration of connective tissue	2.28e-11	Acan, ADAMTS4, BDKRB1, BID, CD14, CD80, CNR2, CTSC, CXCL16, CXCL3, CYTL1, ERRFI1, ESR1, ESR2, F10, FCER1G, FCGR1A, FCGR2A, FCGR2B, FDFT1, FDPS, FN1, FOS, GABRA2, GABRA3, GABRB2, GABRE, HPSE, IL17RA, IL18, IL1A, IL1B, IL1RL1, IL1RN, IL6, LGR4, LIF, LMNA, MMP13, MMP3, NOD2, OSM, PAX8, PLCG2, PRKCQ, PSTPIP2, PTH2R, RECK, RGS12, S100A4, SHH, Slpi (includes others), SPARC, SPHK1, TGFA, THRB, TNF, TNFA…	62		Tissue Morphology	quantity	quantity of B lymphocytes	3.85e-33	AHR, APOE, ARNTL, ATM, B3GNT5, BACH2, BANK1, BCL2A1, BCL2L11, BLNK, BMF, BST1, BTK, C3, CASP8, CCR6, CCR7, CCR9, CD180, CD27, CD274, CD28, CD40, CD69, CD72, CD74, CD80, CD84, CDH17, CEBPE, Cmah, CNR2, CXCL13, CXCR4, DAPP1, DCLRE1C, DLK1, DOCK8, ESR2, FCER1G, FCGR1A, FCGR2A, FCGR2B, FCMR, FES, FLT3, FOS, FZD9, GAPT, HCLS1, HGF, HLA-DQA1, ICOS, IGF2, IKZF3, IL10, IL18, IL21R, IL2RB, IL2RG, IL7R, IN…	135
Immune Cell Trafficking	activation	activation of myeloid cells	3.59e-26	ACE, ADIPOQ, ADORA1, ADRBK1, AGT, AHR, ANXA1, ANXA2, APOE, APP, ARRB2, ATM, BID, BPI, C3, C4A/C4B, C5AR1, CAMP, CASP1, CASR, Ccl2, CCL2, CCL21, CCL22, CCL4, CD14, CD163, CD1D, CD226, CD300A, CD300LB, CD300LD, CD300LF, CD40, CD44, CD63, CD80, CD86, CD93, CEBPB, CEBPE, CERK, CFH, CHI3L1, CLCN7, CLEC11A, CLEC4E, CLEC5A, CNR2, CSF1R, CST3, CX3CR1, CXCL10, CXCL3, CXCL6, CXCR2, CYBB, DPP4, F2RL1, F5, F…	180		Hematological System Development and Function	accumulation	accumulation of lymphocytes	2.29e-15	ACKR2, ADIPOQ, AGT, APOE, ARRB2, B2M, BCL2L11, BCL3, C4A/C4B, CASP8, CCL17, CCL2, Ccl2, CCL21, CCL3L3, CCL5, CCR7, CD1D, CD27, CD28, CD40, CD80, CD86, CTLA4, CX3CR1, CXCL10, CXCL3, CXCR3, CXCR4, DEF6, DLX3, ENPP2, FASLG, ICAM1, ICOS, IFNAR1, IL10RA, IL11, IL17RA, IL21, IL21R, IL2RG, IL6, ITGAL, ITGB2, KLF2, LAT, MLLT11, MYD88, NT5E, PRKCQ, PTPN1, RASGRP1, RBPJ, RGS16, RIPK3, RUNX3, SELE, SELL, SH…	70		Cellular Movement	cell movement	cell movement of blood cells	3.41e-59	ABCA1, Abcb1b, ABCB4, ACKR2, ADA, ADAM17, ADIPOQ, ADORA1, AGT, AHR, AIF1, AKR1B1, ALCAM, ANGPT1, ANXA1, AOC3, APOE, ARG1, BACH2, BATF, BCL11B, BDKRB1, BDNF, BID, BMP4, BTK, BTLA, C2, C3, C5AR1, C5AR2, C6, CAPG, CARD9, CASP1, CBFB, CCL17, CCL19, CCL2, Ccl2, CCL21, CCL22, CCL3L3, CCL4, CCL5, Ccl6, Ccl7, Ccl9, CCND1, CCR4, CCR6, CCR7, CCR9, CD14, CD1D, CD2, CD226, CD247, CD28, CD3E, CD4, CD40, CD44,…	385		Tissue Morphology	quantity	quantity of hematopoietic progenitor cells	2.08e-31	ABCB1, Abcb1b, AHR, ALOX15, APOE, ARNTL, ATM, BBC3, BCL11B, BCL2L11, BIRC5, BLNK, BMF, BTK, CASP8, CBFB, CCR6, CCR7, CCR9, CD180, CD244, CD247, CD28, CD3E, CD3G, CD4, CD40, CD44, CD5, CD5L, CD69, CD7, CD72, CD80, CD86, CD8A, CD8B, CDH17, CDKN2A, CIB1, CORO1A, CSF3R, CTSD, CTSE, CXCR4, DCLRE1C, DLK1, DNASE2, DOK1, DOK2, DYRK3, EIF2AK2, EPB42, EPHA4, ESR2, FCER1G, FCGR2B, FES, FGF4, FLT3, FOS, FOSB…	161
Immune Cell Trafficking	activation	activation of mononuclear leukocytes	3.52e-18	ADA, ADIPOQ, AHR, AICDA, ANXA1, APOE, ARRB2, BANK1, BAX, BCL2L11, BCL3, BLNK, BTK, C3, C4A/C4B, CASP8, CASR, CCL2, Ccl2, CCL22, CCL4, CCR7, CD14, CD163, CD180, CD19, CD1D, CD2, CD209, CD22, CD226, CD244, CD247, Cd24a, CD27, CD274, CD38, CD3G, CD40, CD44, CD5, CD6, CD7, CD80, CD83, CD86, CD8A, CD93, CDKN1A, CEACAM1, CLEC1B, CLEC5A, CLEC7A, Cmah, CORO1A, CSF2RB, CSK, CXCL10, DAPP1, DDR1, DEF6, DOK3…	218		Hematological System Development and Function	accumulation	accumulation of antigen presenting cells	7.96e-14	ACKR3, AGT, APOE, C5AR1, C6, CBS/CBSL, CCL2, Ccl2, CCL21, CCL5, CD28, CD40, CD44, CX3CR1, DDR1, DOCK8, F2R, FAM132A, FGF1, FOSL1, GRN, HAVCR2, HMOX1, IFNAR1, IL12A, IL1RN, INPP5D, IRF1, ITGA1, ITGAM, LAMA5, LDLR, MMP3, MYD88, NR4A1, NT5E, PLAU, RUNX3, S100A9, SPP1, STAT1, THBS1, TIMP1, TLR4, TLR7, TNF, TNFAIP8L2, TNFRSF1B, TNFSF10, TYROBP	50		Cellular Movement	cell movement	cell movement	3.47e-57	A2M, ABCA1, Abcb1b, ABCB4, ABI3, Acan, ACKR2, ACP5, ACSL4, ACTA2, ACTR3, ADA, ADAM17, ADAM19, ADAMTS7, ADARB1, ADIPOQ, ADORA1, AGR2, AGT, AHR, AIF1, AJAP1, AJUBA, AKAP12, AKR1B1, ALCAM, ALK, ALOX12, ALOX15B, ANGPT1, ANGPT4, ANGPTL3, ANPEP, ANXA1, AOC3, APLN, APLNR, APOE, AQP5, ARG1, ARHGAP22, ARHGAP31, ARHGAP4, ARPC1B, ARX, ASPM, ASTN1, ATF3, ATG12, ATM, ATP1A4, AURKA, BACH2, BATF, BCAN, BCL11B, …	722		Tissue Morphology	quantity	quantity of CD4+ T-lymphocytes	2.24e-31	ANPEP, APOE, ATM, BATF, BCL2L11, BMF, Ccl2, CCL5, CCR6, CCR7, CD247, CD274, CD28, CD3D, CD4, CD40, CD5, CD69, CD74, CD83, CD84, CD8A, CDKN2A, CORO1A, CTSV, CXCL10, DCLRE1C, DOCK8, ESR2, GPR83, HLA-A, HLA-DQA1, HLA-DQB1, ICOS, IL10, IL13RA1, IL17RA, IL21R, IL2RB, IL2RG, IRF1, ITGAD, ITGAM, ITGB2, ITGB7, ITK, JAK3, LAG3, LAIR1, LAT, LCK, LCP2, Mt1, NOD2, NPY1R, PIK3CD, PLA2G2D, PRF1, PRKCQ, PTPN6, …	79
Immune Cell Trafficking	activation	activation of antigen presenting cells	1.44e-17	ACE, ADIPOQ, ADORA1, ADRBK1, AGT, AHR, ANXA2, APOE, APP, ATM, BID, BPI, BTK, C3, CAMP, CARD9, CASP1, Ccl2, CCL2, CCL21, CCL22, CCL4, CCR7, CD14, CD1D, CD209, Cd24a, CD37, CD40, CD44, CD80, CD86, CEBPB, CEBPE, CHI3L1, CLCN7, CLEC4E, CLEC7A, CNR2, CPE, CSF1R, CTSS, CX3CR1, CXCL10, CYBB, F2RL1, FAS, FCER1G, FCGR1A, FCGR2A, GDNF, GJA1, GJB1, Gm21596/Hmgb1, HAVCR2, HCK, HGF, HLA-A, HMOX1, HPSE, HSPB8,…	149		Hematological System Development and Function	accumulation	accumulation of granulocytes	3.97e-13	ADGRE5, ADIPOQ, AGT, AHR, ANXA1, BCL2A1, C5AR1, CCL17, CCL2, Ccl2, CCL5, Ccl7, CCR3, CEBPA, CTSC, CXCL10, CXCL2, CXCL3, ELANE, FCGR2A, FCGR3A/FCGR3B, Gm21596/Hmgb1, GRN, HAVCR2, HDC, IL10, IL11, IL17RA, IL18, IL1B, IL1R1, IL1RN, INPP5D, ITGA4, ITGA6, ITGAM, ITGB2, LAMA5, MAPK13, MAPK3, MMP7, MMP8, MMP9, MYD88, NCF1, OSM, P2RY2, PTGDS, S100A8, S100A9, SELL, SELP, SELPLG, Slpi (includes others), TL…	58		Cellular Movement	cell movement	cell movement of leukocytes	2.18e-52	ABCA1, Abcb1b, ABCB4, ACKR2, ADA, ADAM17, ADIPOQ, ADORA1, AGT, AIF1, ALCAM, ANGPT1, ANXA1, AOC3, APOE, ARG1, BACH2, BATF, BCL11B, BDKRB1, BID, BTK, C2, C3, C5AR1, C5AR2, C6, CAPG, CASP1, CBFB, CCL17, CCL19, CCL2, Ccl2, CCL21, CCL22, CCL3L3, CCL4, CCL5, Ccl6, Ccl9, CCND1, CCR4, CCR6, CCR7, CCR9, CD14, CD1D, CD2, CD226, CD247, CD28, CD3E, CD4, CD40, CD44, CD63, CD69, CD80, CD86, CD8A, CD9, CDH1, CD…	335		Tissue Morphology	quantity	quantity of myeloid cells	3.68e-29	ADA, ADAM17, ADGRE5, ADIPOQ, AHR, ALOX15, APOE, ARNTL, B4GALT1, BCL2L11, BDNF, BID, C1QA, C3, C4A/C4B, C5AR1, C5AR2, C6, CASP8, CCL2, Ccl2, CCL22, CCL3L3, CCR6, CD101, CD1D, CD200R1, CD300A, CD40, CD8A, CEBPE, CERK, CFH, CISH, CLEC4E, CLEC7A, CNR2, CSF1R, CSF3R, CTSE, CXCR4, CYBB, CYP1A1, DOK1, DOK2, ESR2, F2RL1, FCGR1A, FCGR2A, FCGR2B, FES, FUT7, FZD9, GADD45A, GPR132, GRK6, GSN, HAVCR2, ICAM1, …	132
Immune Cell Trafficking	activation	activation of lymphocytes	3.37e-17	ADA, ADIPOQ, AHR, AICDA, ANXA1, APOE, BANK1, BAX, BCL2L11, BCL3, BLNK, BTK, C3, C4A/C4B, CASP8, CCL2, Ccl2, CCL22, CCL4, CCR7, CD180, CD19, CD1D, CD2, CD209, CD22, CD226, CD244, CD247, Cd24a, CD27, CD274, CD38, CD3G, CD40, CD44, CD5, CD6, CD7, CD80, CD83, CD86, CD8A, CDKN1A, CEACAM1, CLEC1B, CLEC7A, Cmah, CORO1A, CSF2RB, CSK, CXCL10, DAPP1, DDR1, DEF6, DOK3, DPP4, EGR2, FADD, FAS, FCER1G, FCGR2A,…	207		Hematological System Development and Function	accumulation	accumulation of macrophages	1.15e-12	ACKR3, AGT, APOE, C5AR1, C6, CBS/CBSL, Ccl2, CCL2, CCL5, CD28, CD40, CD44, CX3CR1, DDR1, F2R, FAM132A, FGF1, FOSL1, GRN, HAVCR2, HMOX1, IFNAR1, IL12A, IL1RN, INPP5D, IRF1, ITGA1, ITGAM, LAMA5, LDLR, MMP3, MYD88, NR4A1, NT5E, PLAU, S100A9, SPP1, THBS1, TIMP1, TLR4, TLR7, TNF, TNFAIP8L2, TNFRSF1B, TNFSF10	45		Cellular Movement	cell movement	cell movement of myeloid cells	2.54e-38	ABCA1, ADAM17, ADIPOQ, ADORA1, AGT, AIF1, ANGPT1, ANXA1, AOC3, APOE, ARG1, BID, BTK, C2, C3, C5AR1, C5AR2, C6, CAPG, CASP1, CBFB, CCL17, CCL19, CCL2, Ccl2, CCL21, CCL22, CCL3L3, CCL4, CCL5, CCND1, CCR6, CCR7, CD14, CD2, CD28, CD4, CD44, CD69, CD9, CDKN1A, CES1, CFH, CFTR, CKLF, CLEC11A, CMA1, CNR1, CNR2, COL1A1, COL4A3, CORO1A, CRYAB, CSF1R, CSF2RA, CSF3R, CST3, CTSB, CTSE, CTSS, CTSV, CX3CR1, CX…	234		Tissue Morphology	quantity	quantity of granulocytes	5.72e-29	ADA, ADAM17, ADGRE5, ADIPOQ, AHR, ALOX15, ARNTL, B4GALT1, BCL2L11, BID, C1QA, C3, C4A/C4B, C5AR1, C5AR2, C6, Ccl2, CCL2, CCL22, CCL3L3, CCR6, CD101, CD1D, CD200R1, CD300A, CD40, CD8A, CEBPE, CERK, CFH, CISH, CLEC4E, CLEC7A, CNR2, CSF1R, CSF3R, CTSE, CYBB, CYP1A1, DOK1, DOK2, ESR2, F2RL1, FCGR1A, FCGR2A, FCGR2B, FES, FUT7, FZD9, GADD45A, GPR132, GRK6, GSN, ICAM1, IL10, IL13RA1, IL17RA, IL18, IL18B…	121
Immune Cell Trafficking	activation	activation of macrophages	4.07e-15	ACE, ADIPOQ, ADORA1, ADRBK1, AGT, AHR, ANXA2, APOE, APP, ATM, BID, BPI, C3, CAMP, CASP1, Ccl2, CCL2, CCL21, CCL22, CCL4, CD14, CD1D, CD40, CD44, CEBPB, CEBPE, CHI3L1, CLCN7, CLEC4E, CNR2, CSF1R, CX3CR1, CXCL10, CYBB, F2RL1, FCER1G, GDNF, GJA1, GJB1, HAVCR2, HCK, HLA-A, HMOX1, HPSE, HSPD1, ICAM1, IL10, IL18, IL1B, IL1R1, IL1RL1, IL1RN, IL33, IL4R, IL6, INHBA, ITGA5, JAK2, JMJD6, LEP, LGALS3, MAOB,…	112		Hematological System Development and Function	response	response of lymphocytes	4.6e-27	ADA, AHR, BAX, BCL2L11, C5AR1, CASP1, CASP3, CCL19, CCL2, Ccl2, CCL21, CCR6, CD180, CD1D, CD200R1, CD22, CD276, CD28, CD38, CD3E, CD4, CD40, CD55, CD6, CD80, CD83, CD86, CD8A, CDKN1B, CLEC7A, CSF2RB, CTLA4, CTSS, CXCL11, CYP7B1, DAPP1, DGKZ, DOCK8, EBI3, FADD, FCGR2A, FCGR2B, FOXO1, GATA3, Gm21596/Hmgb1, GZMB, HAVCR2, HMOX1, ICAM1, ICOS, IFNAR1, IL10, IL10RA, IL12A, IL12RB2, IL18, IL1B, IL1R1, IL…	117		Cellular Movement	cell movement	cell movement of phagocytes	1.88e-37	ABCA1, ADAM17, ADIPOQ, ADORA1, AGT, AIF1, ALCAM, ANGPT1, ANXA1, AOC3, APOE, ARG1, BID, BTK, C2, C3, C5AR1, C5AR2, C6, CAPG, CASP1, CCL17, CCL19, CCL2, Ccl2, CCL21, CCL22, CCL3L3, CCL4, CCL5, Ccl9, CCND1, CCR6, CCR7, CD14, CD28, CD4, CD40, CD44, CD69, CD80, CD86, CD9, CDH1, CDKN1A, CES1, CFH, CFTR, CKLF, CLEC11A, CLEC4M, CNR1, CNR2, COL1A1, COL4A3, CORO1A, CSF1R, CSF2RA, CSF3R, CST3, CTSB, CTSE, C…	236		Tissue Morphology	quantity	quantity of thymocytes	2.94e-23	ABCB1, Abcb1b, AHR, ATM, BBC3, BCL11B, BCL2L11, BMF, CBFB, CCR6, CCR7, CCR9, CD244, CD247, CD3E, CD3G, CD4, CD5, CD5L, CD7, CD80, CD86, CD8A, CD8B, CDKN2A, CORO1A, CTSD, CTSE, CXCR4, DCLRE1C, DNASE2, DOK1, EPHA4, ESR2, FCER1G, FCGR2B, FOS, FOSB, FYB, GADD45A, HLA-DQB1, IL12B, IL2RB, IL2RG, IL7R, INPP5D, IRF1, ITGB2, ITK, JAK3, LAG3, LAIR1, LAT, LCK, LCP2, LEP, LIF, LY9, MAPK3, MYH11, NOD2, NOS2, …	91
Immune Cell Trafficking	activation	activation of T lymphocytes	4.58e-13	ADA, ANXA1, APOE, BAX, BCL2L11, BCL3, C3, CASP8, Ccl2, CCL2, CCL22, CCL4, CD19, CD1D, CD2, CD209, CD226, CD244, CD247, Cd24a, CD27, CD274, CD38, CD3G, CD40, CD44, CD6, CD7, CD80, CD83, CD86, CD8A, CDKN1A, CEACAM1, CLEC1B, CLEC7A, CORO1A, CSF2RB, CSK, CXCL10, DDR1, DEF6, DPP4, EGR2, FADD, FAS, FCER1G, FGF1, FOS, FOXD1, FOXJ1, FOXO1, FOXO3, FOXP3, GATA3, GFI1B, GJA4, HAVCR2, HGF, HLA-A, HPRT1, HSH2…	155		Hematological System Development and Function	response	T cell response	2.22e-20	ADA, AHR, BAX, C5AR1, CASP1, CASP3, CCL19, Ccl2, CCL2, CCL21, CD1D, CD200R1, CD276, CD28, CD3E, CD4, CD55, CD6, CD80, CD86, CD8A, CDKN1B, CLEC7A, CSF2RB, CTLA4, CXCL11, DGKZ, DOCK8, EBI3, FOXO1, GATA3, GZMB, HAVCR2, HMOX1, ICAM1, ICOS, IFNAR1, IL10, IL10RA, IL12A, IL12RB2, IL18, IL1B, IL1R1, IL21, IL21R, IL6, IL7R, ITK, LAG3, LAX1, LGALS1, LIF, LTB, MYD88, NFIL3, OASL, PDCD1, PGAP3, PIK3R1, PLAUR…	91		Cellular Movement	cell movement	cell movement of mononuclear leukocytes	2.86e-33	ABCA1, Abcb1b, ACKR2, ADAM17, AGT, AIF1, ANGPT1, ANXA1, AOC3, APOE, BACH2, BATF, BCL11B, BTK, C3, C6, CBFB, CCL17, CCL19, CCL2, Ccl2, CCL21, CCL22, CCL3L3, CCL4, CCL5, Ccl6, CCR4, CCR6, CCR7, CCR9, CD1D, CD2, CD226, CD247, CD28, CD3E, CD4, CD40, CD44, CD69, CD80, CD86, CD8A, CIITA, CKLF, CNR2, COL1A1, COL4A3, CTSS, CTSV, CX3CR1, CXCL10, CXCL11, CXCL16, CXCL3, Cxcl9, CXCR1, CXCR3, CXCR4, CYSLTR1, …	199		Tissue Morphology	quantity	quantity of neutrophils	7.92e-23	ADA, ADAM17, ADIPOQ, AHR, ARNTL, B4GALT1, C1QA, C3, C4A/C4B, C5AR1, C5AR2, C6, Ccl2, CCL2, CCL3L3, CD1D, CD300A, CD40, CERK, CFH, CLEC4E, CLEC7A, CNR2, CSF3R, CYBB, CYP1A1, DOK1, DOK2, ESR2, F2RL1, FCGR1A, FCGR2A, FCGR2B, FES, FUT7, FZD9, GPR132, GSN, ICAM1, IL10, IL17RA, IL18, IL18BP, IL1A, IL1B, IL1R1, IL2RB, IL2RG, INPP5D, IRF6, ITGAL, ITGAM, ITGB2, JAK3, LCN2, LEP, LYN, MMP12, MMP3, MMP8, MMP…	88
Immune Cell Trafficking	homing	homing of leukocytes	3.67e-32	ACKR2, ACKR3, ADAM17, ADORA1, AIF1, ANXA1, AOC3, APOE, APP, AQP9, B4GALT1, BATF, C1QBP, C3, C5AR1, C5AR2, CAMK1D, CAMP, CAPG, CASR, CCL2, Ccl2, CCL20, CCL21, CCL22, CCL24, CCL3L3, CCL4, CCND1, CCR3, CCR4, CCR6, CCR7, CCR9, CD38, CD44, CD9, CDKN1A, CHST4, CKLF, CMKLR1, CNR2, CORO1A, CSF1R, CSF2RA, CSF3R, CST3, CTSE, CX3CR1, CXCL10, CXCL11, CXCL13, CXCL14, CXCL16, CXCL2, Cxcl3, CXCL3, CXCL6, CXCR2,…	207		Hematological System Development and Function	chemotaxis	chemotaxis of leukocytes	4.66e-27	ACKR2, ACKR3, ADAM17, ADORA1, AIF1, ANGPT1, ANXA1, APOE, AQP9, B4GALT1, C3, C5AR1, C5AR2, CAMK1D, CAPG, CCL17, CCL19, Ccl2, CCL2, CCL21, CCL22, CCL3L3, CCL4, CCL5, CCND1, CCR3, CCR6, CCR7, CD28, CD38, CD4, CD69, CD9, CDKN1A, CKLF, CMKLR1, CORO1A, CSF1R, CSF2RA, CSF3R, CST3, CTSE, CX3CR1, CXADR, CXCL10, CXCL11, CXCL13, CXCL14, CXCL16, CXCL2, CXCL3, Cxcl3, CXCL6, CXCR1, CXCR3, CXCR4, CYBB, CYSLTR1,…	185		Cellular Movement	cell movement	cell movement of granulocytes	6.17e-30	ADAM17, ADIPOQ, ADORA1, AGT, ANXA1, AOC3, APOE, BTK, C2, C3, C5AR1, C5AR2, CAPG, CASP1, CBFB, CCL17, CCL19, Ccl2, CCL2, CCL21, CCL3L3, CCL4, CCL5, CCR6, CCR7, CD14, CD2, CD28, CD44, CD69, CFH, CFTR, CKLF, CLEC11A, CMA1, CORO1A, CRYAB, CSF2RA, CSF3R, CST3, CTSB, CXADR, CXCL10, CXCL11, CXCL14, CXCL2, CXCL3, Cxcl3, CXCL6, Cxcl9, CXCR1, CXCR3, CYBB, EDNRA, F10, F2R, F2RL1, FASLG, FCER1G, FCGR2A, FGR,…	164		Tissue Morphology	quantity	quantity of macrophages	6.93e-21	ABCA1, ADA, ADIPOQ, AGT, APOB, APOE, BCL2L11, BID, BIRC3, C4A/C4B, C5AR1, CCL2, Ccl2, CCL22, CCR6, CD200R1, CD40, CES1, CSF1R, CTSS, CTSV, CX3CR1, CXCL10, CXCR6, DDR1, GPR132, GPR68, GREM1, HAVCR2, HBEGF, HCK, HSD11B1, IL10, IL12B, IL12RB2, IL18, IL1A, IL1B, IL1R1, IL2RG, IRF8, ITGAD, ITGB2, JAK2, LCN2, LGALS3, LIF, LILRB4, LIPG, LSP1, MMP12, MMP3, MMP9, MPZ, Mt1, NOS1, NPY, PLA2G15, PRF1, PTGER2…	76
Immune Cell Trafficking	homing	homing of neutrophils	2.44e-18	ADORA1, APP, AQP9, C1QBP, C3, C5AR1, C5AR2, CAMK1D, CAMP, CAPG, Ccl2, CCL2, CCL21, CCL24, CCL3L3, CCL4, CCR6, CCR7, CKLF, CORO1A, CSF2RA, CSF3R, CST3, CXCL10, CXCL14, CXCL2, CXCL3, Cxcl3, CXCL6, CXCR2, FCER1G, FCGR2A, FGR, FPR1, GRK6, GRN, GSN, HCK, ICAM1, IL18, IL1B, IL1R1, IL33, INPP5D, ITGA1, ITGA4, ITGAM, ITGB2, LGALS3, LSP1, LTB4R, LYN, MAPKAPK2, MDK, MYO1F, NCKAP1L, NLRP12, NOD2, NPR1, PDE4…	93		Hematological System Development and Function	chemotaxis	chemotaxis of phagocytes	3.36e-24	ADORA1, AIF1, ANGPT1, ANXA1, APOE, AQP9, B4GALT1, C3, C5AR1, C5AR2, CAMK1D, CAPG, CCL17, CCL19, Ccl2, CCL2, CCL21, CCL22, CCL3L3, CCL4, CCL5, CCND1, CCR3, CCR6, CCR7, CD28, CD38, CD4, CD69, CD9, CDKN1A, CKLF, CMKLR1, CORO1A, CSF1R, CSF2RA, CSF3R, CST3, CTSE, CX3CR1, CXADR, CXCL10, CXCL14, CXCL2, Cxcl3, CXCL3, CXCL6, CXCR1, CXCR3, CXCR4, CYBB, ELANE, ELN, F2R, FASLG, FCER1G, FCGR2A, FGR, GLRB, GRK…	155		Cellular Movement	cell movement	cell movement of lymphocytes	3.02e-28	Abcb1b, ACKR2, ADAM17, AGT, ANXA1, AOC3, BACH2, BATF, BCL11B, BTK, C3, C6, CBFB, CCL17, CCL19, Ccl2, CCL2, CCL21, CCL22, CCL3L3, CCL4, CCL5, Ccl6, CCR4, CCR6, CCR7, CCR9, CD1D, CD2, CD226, CD247, CD28, CD3E, CD4, CD40, CD44, CD69, CD80, CD86, CD8A, CKLF, CNR2, COL1A1, COL4A3, CTSS, CTSV, CX3CR1, CXCL10, CXCL11, CXCL16, CXCL3, Cxcl9, CXCR3, CXCR4, CYSLTR1, CYTIP, DOCK8, ESR1, ESR2, EZR, F2RL1, FAM…	167		Tissue Morphology	quantity	quantity of lymphatic system cells	4.48e-20	ABCB1, Abcb1b, ABCG2, AHR, ALCAM, ALDH1A2, ALOX15, APOE, ARNTL, ATM, BCL2A1, BCL2L11, BIRC5, BLNK, BMF, CASP8, CD180, CD1D, CD274, CD40, CD44, CD72, CD74, CD80, CD84, CDH17, CDKN2A, CEBPE, CIB1, Cmah, CNR2, CSF3R, CXCL13, CXCR4, DCLRE1C, DLK1, DOCK8, DOK1, DOK2, ESR2, FCMR, FES, FGF4, FOS, FUT7, GAPT, HCK, ICOS, IKZF3, IL1A, IL2RG, IL7R, INPP5D, IRF8, ITGB2, ITK, JAK3, KLHL6, LAIR1, LCN2, LTB, Ly…	97
Immune Cell Trafficking	homing	homing of granulocytes	2.21e-17	ADORA1, ANXA1, APP, AQP9, C1QBP, C3, C5AR1, C5AR2, CAMK1D, CAMP, CAPG, Ccl2, CCL2, CCL21, CCL24, CCL3L3, CCL4, CCR3, CCR6, CCR7, CKLF, CORO1A, CSF2RA, CSF3R, CST3, CXCL10, CXCL14, CXCL2, Cxcl3, CXCL3, CXCL6, CXCR2, CXCR3, FCER1G, FCGR2A, FGR, FPR1, GRK6, GRN, GSN, HCK, ICAM1, IL10, IL18, IL1B, IL1R1, IL33, INPP5D, ITGA1, ITGA4, ITGAM, ITGB2, LGALS1, LGALS3, LSP1, LTB4R, LYN, MAPKAPK2, MDK, MYO1F,…	103		Hematological System Development and Function	chemotaxis	chemotaxis of myeloid cells	3.55e-24	ADORA1, AIF1, ANGPT1, ANXA1, APOE, AQP9, B4GALT1, C3, C5AR1, C5AR2, CAMK1D, CAPG, CCL17, CCL19, CCL2, Ccl2, CCL21, CCL22, CCL3L3, CCL4, CCL5, CCND1, CCR3, CCR6, CCR7, CD28, CD4, CD69, CD9, CDKN1A, CKLF, CMKLR1, CORO1A, CSF1R, CSF2RA, CSF3R, CST3, CTSE, CX3CR1, CXADR, CXCL10, CXCL14, CXCL2, CXCL3, Cxcl3, CXCL6, CXCR1, CXCR3, CXCR4, CYBB, ELANE, ELN, F2R, FASLG, FCER1G, FCGR2A, FGR, GLRB, GRK6, GRN…	154		Cellular Movement	cell movement	cell movement of neutrophils	1.7e-27	ADAM17, ADIPOQ, ADORA1, AGT, ANXA1, APOE, BTK, C2, C3, C5AR1, C5AR2, CAPG, CASP1, CCL19, Ccl2, CCL2, CCL21, CCL3L3, CCL4, CCL5, CCR6, CCR7, CD14, CD28, CD44, CD69, CFH, CFTR, CKLF, CORO1A, CSF2RA, CSF3R, CST3, CTSB, CXADR, CXCL10, CXCL14, CXCL2, CXCL3, Cxcl3, CXCL6, CXCR1, CYBB, EDNRA, F10, F2RL1, FASLG, FCER1G, FCGR2A, FGR, FN1, FUT4, FUT7, GJB2, GRK6, GRN, GSN, HCK, HGF, HMOX1, HSPB1, ICAM1, IL…	135		Tissue Morphology	quantity	quantity of CD8+ T lymphocyte	2e-19	ATM, BATF, BBC3, BCL11B, BCL2L11, BMF, CCR6, CD247, CD274, CD28, CD3D, CD4, CD5, CD74, CD8A, CD8B, CDKN2A, CORO1A, CXCL10, DCLRE1C, DOCK8, ESR2, HLA-A, HLA-DQA1, HLA-DQB1, IL2RB, IL2RG, IRF1, ITGAD, ITGAM, ITGB2, ITK, JAK3, LAG3, LAIR1, LCK, LCP2, Mt1, NPY1R, PIK3CD, PRF1, PRKCQ, PSMB10, PSMB8, PSMB9, PTPN6, PTPRC, RASGRP1, RHOH, SIGLEC1, SIT1, SPI1, ST8SIA1, TAP1, TAPBP, TNF, TXK, VAV1, VAV2, ZB…	60
Immune Cell Trafficking	homing	homing of mononuclear leukocytes	3.87e-15	ACKR2, ACKR3, ADAM17, AIF1, ANXA1, AOC3, BATF, CAMP, CASR, Ccl2, CCL2, CCL20, CCL21, CCL22, CCL24, CCL4, CCR3, CCR4, CCR6, CCR7, CCR9, CD44, CHST4, CKLF, CNR2, CXCL10, CXCL11, CXCL13, CXCL16, CXCL3, CXCR3, CXCR4, CYSLTR1, DIAPH1, DPP4, ELN, ENPP2, F2R, FOXO1, FOXP3, FPR1, FUT7, FYB, GATA3, GNA13, GNAO1, GNAZ, HEBP1, HLA-G, HP, HSPD1, IL10, IL16, IL1B, INHBA, ITGA4, ITGAL, ITGB7, JAK2, JAK3, LAT, …	103		Hematological System Development and Function	chemotaxis	chemotaxis of neutrophils	9.74e-17	ADORA1, AQP9, C3, C5AR1, C5AR2, CAMK1D, CAPG, CCL19, CCL2, Ccl2, CCL21, CCL3L3, CCL4, CCL5, CCR6, CCR7, CD28, CD69, CKLF, CORO1A, CSF2RA, CSF3R, CST3, CXADR, CXCL10, CXCL14, CXCL2, CXCL3, Cxcl3, CXCL6, CXCR1, ELANE, FASLG, FCER1G, FCGR2A, FGR, GRK6, GRN, GSN, HCK, ICAM1, IL18, IL1B, IL1R1, INPP5D, ITGA1, ITGA4, ITGAM, ITGB2, LBP, LCN2, LGALS3, LSP1, LYN, MYO1F, NCKAP1L, NOD2, PDE4B, PENK, PF4, PI…	89		Cellular Movement	cell movement	cell movement of T lymphocytes	3.41e-22	ACKR2, ADAM17, AGT, AOC3, BACH2, BATF, BCL11B, C3, C6, CCL17, CCL19, Ccl2, CCL2, CCL21, CCL22, CCL3L3, CCL4, CCL5, CCR4, CCR6, CCR7, CCR9, CD28, CD40, CD44, CD69, CD80, CD86, COL1A1, COL4A3, CTSS, CTSV, CXCL10, CXCL11, CXCL16, Cxcl9, CXCR3, CXCR4, CYSLTR1, DOCK8, ESR2, F2RL1, FAM65B, FASLG, FN1, FOXO1, FUT4, FUT7, FYB, GNRH1, HGF, HLA-A, ICAM1, ICOS, IL16, IL17C, IL17RA, IL18BP, IL1B, IL6, INPP5D…	101		Tissue Morphology	quantity	quantity of dendritic cells	2.1e-19	ADA, BATF3, C5AR1, CCL19, Ccl2, CCL2, CCL21, Ccl9, CCR6, CCR7, CD83, CLEC4D, CLEC4E, CSF1R, CXCL13, DOCK8, F2RL1, FCER1G, FCGR2B, FLT3, HBEGF, IL10, IL12RB2, IL18, IL1RN, IL2RG, IL7R, INPP5D, IRF1, IRF4, IRF8, ITGB2, JAK3, LAIR1, LTB, MMP9, NLRP10, PLA2G2D, PTPN6, SELL, SFTPA1, SIRPA, SOCS1, SPI1, SPIB, SPP1, SPPL2A, TGFBR1, TLR2, TLR4, TNF, TNFSF11, TYROBP, XCL1	54
Immune Cell Trafficking	chemotaxis	chemotaxis of leukocytes	4.27e-28	ACKR2, ACKR3, ADAM17, ADORA1, AIF1, ANXA1, APOE, APP, AQP9, B4GALT1, C1QBP, C3, C5AR1, C5AR2, CAMK1D, CAMP, CAPG, CASR, Ccl2, CCL2, CCL20, CCL21, CCL22, CCL24, CCL3L3, CCL4, CCND1, CCR3, CCR4, CCR6, CCR7, CD38, CD9, CDKN1A, CKLF, CMKLR1, CORO1A, CSF1R, CSF2RA, CSF3R, CST3, CTSE, CX3CR1, CXCL10, CXCL11, CXCL13, CXCL14, CXCL16, CXCL2, Cxcl3, CXCL3, CXCL6, CXCR2, CXCR3, CXCR4, CYBB, CYSLTR1, DIAPH1,…	189		Hematological System Development and Function	chemotaxis	chemotaxis of granulocytes	5.27e-16	ADORA1, ANXA1, AQP9, C3, C5AR1, C5AR2, CAMK1D, CAPG, CCL19, CCL2, Ccl2, CCL21, CCL3L3, CCL4, CCL5, CCR3, CCR6, CCR7, CD28, CD69, CKLF, CORO1A, CSF2RA, CSF3R, CST3, CXADR, CXCL10, CXCL14, CXCL2, Cxcl3, CXCL3, CXCL6, CXCR1, CXCR3, ELANE, FASLG, FCER1G, FCGR2A, FGR, GRK6, GRN, GSN, HCK, ICAM1, IL10, IL18, IL1B, IL1R1, INPP5D, ITGA1, ITGA4, ITGAM, ITGB2, LBP, LCN2, LGALS1, LGALS3, LSP1, LYN, MYO1F, N…	99		Cellular Movement	cell movement	cell movement of antigen presenting cells	2.47e-21	ACKR2, ADAM17, ADIPOQ, ADORA1, AGT, ALCAM, ANXA1, APOE, ARG1, BID, C3, C5AR1, C6, CASP1, CCL17, CCL19, Ccl2, CCL2, CCL21, CCL22, CCL3L3, CCL4, CCL5, Ccl9, CCND1, CCR6, CCR7, CD40, CD44, CD80, CD86, CDH1, CDKN1A, CES1, CKLF, CLEC4M, CNR1, CNR2, COL4A3, CSF1R, CTSE, CTSZ, CX3CR1, CXCL10, CXCL11, CXCL14, CXCR1, CXCR3, CXCR4, CYBB, DOCK8, EDNRB, EGLN3, ELN, FASLG, GSN, HCLS1, HGF, HMOX1, HRH1, ICAM1,…	139		Tissue Morphology	quantity	quantity of regulatory T lymphocytes	7.08e-16	ADIPOQ, BATF, BCL2L11, CCL19, CCL21, CCL4, CCL5, CD1D, CD27, CD28, CD5, CD80, CD86, CTSV, CXCR3, EBI3, FCGR2B, FLT3, ICOS, IL10, IL12B, IL2RB, IL7R, ITGB2, ITGB8, Klrk1, LEP, LTB, PDCD1, PRKCQ, PTAFR, PTPN22, SELE, SELL, SELP, SELPLG, SFTPA1, TGFBR1, THBS1, TLR2, TLR9, TNF, TNFRSF1B, TNFSF15, WAS, XCL1	46
Immune Cell Trafficking	chemotaxis	chemotaxis of myeloid cells	1.75e-26	ADORA1, AIF1, ANXA1, APOE, APP, AQP9, B4GALT1, C1QBP, C3, C5AR1, C5AR2, CAMK1D, CAMP, CAPG, CASR, Ccl2, CCL2, CCL20, CCL21, CCL22, CCL24, CCL3L3, CCL4, CCND1, CCR3, CCR6, CCR7, CD9, CDKN1A, CKLF, CMKLR1, CORO1A, CSF1R, CSF2RA, CSF3R, CST3, CTSE, CX3CR1, CXCL10, CXCL14, CXCL2, Cxcl3, CXCL3, CXCL6, CXCR2, CXCR3, CXCR4, CYBB, EDNRB, ELN, F2R, FCER1G, FCGR2A, FGR, FPR1, GLRB, GRK6, GRN, GSN, HCAR2, H…	160		Hematological System Development and Function	recruitment	recruitment of leukocytes	8.64e-27	ADAM17, ADIPOQ, AGT, AHR, ALOX15, ANXA1, AOC3, APOE, ARRB2, B4GALT1, C3, C4A/C4B, C5AR1, CAMK1, CARD9, CASP1, CAV1, CCL17, CCL19, CCL2, Ccl2, CCL21, CCL22, CCL3L3, CCL4, CCL5, Ccl6, Ccl7, CCR3, CCR6, CCR7, CD14, CD28, CD4, CD40, CD44, CD5L, CD69, CD8A, CLEC4E, CLEC7A, CMKLR1, CNR2, CR2, CRYAB, CSF1R, CSF2RB, CTSC, CX3CR1, CXCL10, CXCL11, CXCL16, CXCL2, CXCL3, CXCR3, CXCR4, CYP1A1, CYP1B1, ELANE, …	169		Cellular Movement	cell movement	cell movement of macrophages	1.85e-17	ADAM17, ADIPOQ, AGT, ANXA1, APOE, ARG1, BID, C3, C6, CASP1, Ccl2, CCL2, CCL21, CCL22, CCL3L3, CCL4, CCL5, CCND1, CCR6, CD44, CDKN1A, CES1, CKLF, CNR1, CNR2, COL4A3, CSF1R, CTSE, CX3CR1, CXCL10, CXCR3, CXCR4, CYBB, EDNRB, EGLN3, ELN, FASLG, GSN, HGF, HMOX1, ICAM1, IL16, IL17C, IL17RA, IL18, IL1B, IL1RN, IL4R, IRF6, Irgm1, ITGAL, ITGB2, LCAT, LEP, LGALS3, LTB, MDK, MIF, MMP12, MMP28, MMP7, MST1, MY…	105		Tissue Morphology	quantity	quantity of double-positive thymocyte	1.81e-14	ABCB1, Abcb1b, ATM, BCL11B, BCL2L11, CCR6, CCR9, CD247, CD3E, CD4, CD5, CD7, CD80, CD86, CD8A, CDKN2A, CTSD, CTSE, CXCR4, DCLRE1C, DNASE2, ESR2, FOS, IL2RB, IL2RG, IL7R, IRF1, ITGB2, ITK, LAT, LCK, LCP2, PIK3CD, PRKCQ, PTPRC, RHOH, RUNX1, SASH3, SIT1, SPI1, ST14, VAV1, VAV3, WAS, ZAP70	45
Immune Cell Trafficking	chemotaxis	chemotaxis of phagocytes	5.73e-26	ADORA1, AIF1, ANXA1, APOE, APP, AQP9, B4GALT1, C1QBP, C3, C5AR1, C5AR2, CAMK1D, CAMP, CAPG, CASR, Ccl2, CCL2, CCL20, CCL21, CCL22, CCL24, CCL3L3, CCL4, CCND1, CCR3, CCR6, CCR7, CD38, CD9, CDKN1A, CKLF, CMKLR1, CORO1A, CSF1R, CSF2RA, CSF3R, CST3, CTSE, CX3CR1, CXCL10, CXCL14, CXCL2, Cxcl3, CXCL3, CXCL6, CXCR2, CXCR3, CXCR4, CYBB, EDNRB, ELN, F2R, FCER1G, FCGR2A, FGR, FPR1, GLRB, GRK6, GRN, GSN, HC…	160		Hematological System Development and Function	recruitment	recruitment of myeloid cells	7.22e-21	ADAM17, AGT, AHR, ALOX15, ANXA1, AOC3, APOE, ARRB2, B4GALT1, C3, C5AR1, CAMK1, CARD9, CASP1, CAV1, CCL19, CCL2, Ccl2, CCL22, CCL3L3, CCL4, CCL5, Ccl7, CCR3, CCR6, CD14, CD28, CD44, CD69, CD8A, CLEC4E, CNR2, CR2, CSF1R, CSF2RB, CTSC, CX3CR1, CXCL10, CXCL2, CXCL3, CYP1A1, CYP1B1, ELANE, F2RL1, FASLG, FCGR2A, FCGR2B, FCGR3A/FCGR3B, FUT7, GLRX, GRK6, GSN, HSPA1A/HSPA1B, ICAM1, IFNAR1, IL10, IL17RA, I…	117		Cellular Movement	cell movement	cell movement of tumor cell lines	2.07e-14	A2M, ACSL4, ACTA2, ADAM17, ADIPOQ, AGR2, AGT, AJAP1, AKAP12, ALCAM, ALOX12, ANPEP, ANXA1, AQP5, ARPC1B, ATF3, AURKA, BCAN, BDKRB1, BMP6, BRCA1, C3, CA9, CALML3, CASP8, CCL17, CCL19, CCL2, Ccl2, CCL21, CCL22, CCL4, CCL5, CCR7, CCR9, CD28, CD40, CD44, CD69, CD9, CD97, CDC25B, CDH1, CDH11, CDKN1A, CDKN2A, CKLF, CLCN3, CLDN4, CNN1, COL18A1, COL1A1, COL4A3, CREB3L1, CSF1R, CST6, CTSB, CTSZ, CXCL10, CX…	245		Tissue Morphology	quantity	quantity of follicular B lymphocytes	8.32e-14	APOE, ARNTL, BCL2A1, BCL2L11, BLNK, BMF, CD180, CD274, CD40, CD72, CD74, CD80, CD84, CDH17, Cmah, CNR2, DLK1, DOCK8, FCMR, GAPT, ICOS, IKZF3, IRF8, ITK, KLHL6, LAIR1, LYN, NPY1R, PIK3AP1, PIK3CD, PLCG2, PTPN22, RGS1, SASH3, SH3BP2, SIGLEC1, SPPL2A, TNFSF15, TYROBP, VAV1, VAV2, WAS	42
Immune Cell Trafficking	chemotaxis	chemotaxis of neutrophils	5.86e-18	ADORA1, APP, AQP9, C1QBP, C3, C5AR1, C5AR2, CAMK1D, CAMP, CAPG, Ccl2, CCL2, CCL21, CCL24, CCL3L3, CCL4, CCR6, CCR7, CKLF, CORO1A, CSF2RA, CSF3R, CST3, CXCL10, CXCL14, CXCL2, CXCL3, Cxcl3, CXCL6, CXCR2, FCER1G, FCGR2A, FGR, FPR1, GRK6, GRN, GSN, HCK, ICAM1, IL18, IL1B, IL1R1, IL33, INPP5D, ITGA1, ITGA4, ITGAM, ITGB2, LGALS3, LSP1, LTB4R, LYN, MAPKAPK2, MDK, MYO1F, NCKAP1L, NLRP12, NOD2, NPR1, PDE4…	92		Hematological System Development and Function	recruitment	recruitment of granulocytes	9.49e-20	ADAM17, AGT, AHR, ALOX15, ANXA1, APOE, ARRB2, B4GALT1, C3, C5AR1, CAMK1, CARD9, CASP1, CAV1, CCL19, Ccl2, CCL2, CCL22, CCL3L3, CCL4, CCL5, Ccl7, CCR3, CCR6, CD14, CD28, CD44, CD69, CD8A, CLEC4E, CR2, CSF2RB, CTSC, CX3CR1, CXCL10, CXCL2, CXCL3, CYP1A1, CYP1B1, ELANE, F2RL1, FASLG, FCGR2A, FCGR2B, FCGR3A/FCGR3B, FUT7, GLRX, GRK6, GSN, HSPA1A/HSPA1B, ICAM1, IFNAR1, IL10, IL17RA, IL18, IL1A, IL1B, IL…	111		Cellular Movement	cell movement	cell movement of hematopoietic cells	2.79e-13	BDNF, BMP4, CCL19, CCL2, CCL21, CCL22, CCL3L3, CCL4, CCL5, CCR4, CCR9, CD28, CD44, CD69, CIB1, CXCL10, CXCL11, CXCR3, CXCR4, DDR1, DOCK8, HGF, ICAM1, ITGA4, ITGA6, ITGAL, ITGB2, JAK2, KLF2, LCP1, MMP9, PLCG2, RGS1, RUNX1, SELE, SELPLG, SPI1, SYK, TCIRG1, TNF, ZAP70	41		Tissue Morphology	quantity	quantity of plasma cells	1.1e-13	CD274, CD40, CEBPE, FCGR2B, FCMR, ICOS, IL10, IL2RB, IL2RG, IL7R, IRF8, ITGB2, LILRB4, LYN, Mt1, PDCD1, PRDM1, PTPN6, RAC2, RASGRP1, RASSF5, RGS1, SDC1, SELE, SELP, TNF, TNFRSF1B, TNFSF15, WAS	29
Immune Cell Trafficking	chemotaxis	chemotaxis of granulocytes	4.96e-17	ADORA1, ANXA1, APP, AQP9, C1QBP, C3, C5AR1, C5AR2, CAMK1D, CAMP, CAPG, Ccl2, CCL2, CCL21, CCL24, CCL3L3, CCL4, CCR3, CCR6, CCR7, CKLF, CORO1A, CSF2RA, CSF3R, CST3, CXCL10, CXCL14, CXCL2, Cxcl3, CXCL3, CXCL6, CXCR2, CXCR3, FCER1G, FCGR2A, FGR, FPR1, GRK6, GRN, GSN, HCK, ICAM1, IL10, IL18, IL1B, IL1R1, IL33, INPP5D, ITGA1, ITGA4, ITGAM, ITGB2, LGALS1, LGALS3, LSP1, LTB4R, LYN, MAPKAPK2, MDK, MYO1F,…	102		Hematological System Development and Function	recruitment	recruitment of neutrophils	2.23e-19	ADAM17, AGT, AHR, ALOX15, ANXA1, APOE, ARRB2, B4GALT1, C5AR1, CAMK1, CASP1, CAV1, CCL19, Ccl2, CCL2, CCL22, CCL3L3, CCL4, CCL5, Ccl7, CD14, CD28, CD44, CD69, CD8A, CLEC4E, CR2, CTSC, CX3CR1, CXCL10, CXCL2, CXCL3, CYP1A1, CYP1B1, ELANE, F2RL1, FASLG, FCGR2A, FCGR2B, FCGR3A/FCGR3B, FUT7, GLRX, GRK6, GSN, HSPA1A/HSPA1B, ICAM1, IFNAR1, IL10, IL17RA, IL18, IL1A, IL1B, IL1R1, IL1RN, IL21, IL6, IRF6, IT…	98		Cellular Movement	cell movement	cell movement of connective tissue cells	9.38e-13	ADIPOQ, AGT, AHR, ANGPT1, APOE, ARHGAP4, CCL17, Ccl2, CCL2, CCL4, CCL5, CCNA2, CCND1, CCR7, CD44, CDKN1A, CDKN2A, COL1A1, COL7A1, CSF1R, CXCL10, CXCL16, CXCR3, ELN, EPHB1, EZR, F2R, FGF1, FN1, FOS, GSN, HAS1, HCK, HGF, HMMR, IGF2R, IL16, IL1B, IL1R1, IL6, Ins1, KCNMA1, LEP, MAP3K1, MAPK3, MIF, MRAS, NCF1, NCK2, NDST3, NTF3, OSM, PF4, PGGT1B, PIK3CB, PLAUR, POSTN, PTPN2, RAC2, RAMP2, RAMP3, RAPGEF…	82		Tissue Morphology	abnormal morphology	abnormal morphology of lymph node	1.38e-21	ALOX15, ANGPTL4, ATM, B3GNT5, Bst2, CASP8, CCR6, CCR7, CCR9, CD247, CD40, CD74, CD80, CD86, CEBPE, CYP27B1, DCLRE1C, ESR2, FCGR2B, FOXC2, FUT7, FZD9, HLA-DQA1, HLA-DQB1, HMOX1, ICOS, IL10, IL10RB, IL2RB, IL2RG, INPP5D, IRF4, IRF8, ITGB2, JAK3, LAT, LIPA, LTB, LYN, MGAT2, NOD2, NOS2, NPY1R, PIK3CD, PLCD1, PRF1, PSEN2, PTPN22, PTPRCAP, RASSF5, RIPK3, RNF128, SATB1, SELE, SELL, SELP, TCIRG1, TLR4, T…	66
Immune Cell Trafficking	infiltration	infiltration of leukocytes	6.97e-28	ABCB4, ADA, ADAM17, ADIPOQ, ADRB3, ADRBK1, AGT, ALOX5AP, ANXA1, APOE, APP, ARG1, ARRB2, B4GALT1, BGN, BID, C2, C3, C4A/C4B, CASP1, CBFB, CCL2, Ccl2, CCL21, CCL22, CCL3L3, CCL4, CCR6, CCR7, CD14, CD2, CD274, CD44, CD80, CD86, CD93, CES1, CFB, CFH, CIITA, CLEC5A, CMKLR1, CNP, CNR2, COL4A3, CSF1R, CTSB, CXCL10, CXCL16, CXCL2, CXCL3, CXCR2, CYBB, CYSLTR1, DCN, EEF1A2, ESR1, ESR2, F2R, F2RL1, FABP4, F…	204		Hematological System Development and Function	recruitment	recruitment of phagocytes	4.14e-18	ADAM17, ADIPOQ, AGT, AHR, ALOX15, ANXA1, APOE, ARRB2, B4GALT1, C5AR1, CAMK1, CASP1, CAV1, CCL19, Ccl2, CCL2, CCL22, CCL3L3, CCL4, CCL5, Ccl7, CD14, CD28, CD4, CD40, CD44, CD5L, CD69, CD8A, CLEC4E, CMKLR1, CR2, CRYAB, CSF1R, CTSC, CX3CR1, CXCL10, CXCL2, CXCL3, CYP1A1, CYP1B1, ELANE, F13A1, F2RL1, FASLG, FCGR2A, FCGR2B, FCGR3A/FCGR3B, FUT7, FUT8, GLRX, GRK6, GSN, HSPA1A/HSPA1B, ICAM1, IFNAR1, IL10,…	120		Cellular Movement	cell movement	cell movement of hematopoietic progenitor cells	1.33e-12	BMP4, CCL19, CCL2, CCL21, CCL22, CCL3L3, CCL4, CCL5, CCR4, CCR9, CD28, CD69, CIB1, CXCL10, CXCL11, CXCR3, CXCR4, DDR1, DOCK8, HGF, ICAM1, ITGA4, ITGA6, ITGAL, ITGB2, JAK2, KLF2, LCP1, MMP9, PLCG2, RGS1, RUNX1, SELPLG, SPI1, SYK, TCIRG1, TNF, ZAP70	38		Tissue Morphology	size	size of lesion	3.91e-21	ACAT2, ADIPOQ, AGT, ALOX15, ANXA1, APOA4, APOB, APOE, BBC3, BDNF, BID, BNIP3, C1QA, C3, CASP1, CAV3, Ccl2, CD4, CD40, CD44, CES1, CNR1, CNR2, CNTF, COL18A1, CRYAB, CTSS, CTSV, CX3CR1, DDR1, DUSP6, EPHX2, ESR2, FAIM2, FCER1G, GPX1, GRN, GSN, HGF, HLA-A, HMOX1, ICAM1, IGF2, IL10, IL18, IL1A, IL1B, IL1R1, IL1RN, IRF1, ITGAM, LCAT, LEP, LGALS3, LIPE, MMP12, MMP3, MMP9, MSR1, NGF, NGFR, NOS1, NOS2, NR…	93
Immune Cell Trafficking	infiltration	infiltration of myeloid cells	1.28e-20	ADAM17, ADIPOQ, ADRB3, ADRBK1, AGT, ALOX5AP, ANXA1, APOE, ARRB2, B4GALT1, C2, C3, C4A/C4B, CASP1, CBFB, CCL21, CCL4, CCR7, CD14, CD2, CD44, CFB, CFH, CMKLR1, CTSB, CXCL10, CXCL2, CXCL3, CXCR2, F2R, F2RL1, FABP4, FAS, FCER1G, FPR1, FUT4, FUT7, GJB2, HCK, HGF, HIF1A, HMOX1, ICAM1, IKBKG, IL10, IL17RA, IL18, IL1A, IL1B, IL1R1, IL1RL1, IL1RN, IL2RB, IL33, IL4R, IL6, IL6R, ITGAL, ITGAM, ITGB2, JAK3, L…	116		Hematological System Development and Function	recruitment	recruitment of lymphocytes	2.8e-14	AGT, AOC3, CCL17, CCL19, Ccl2, CCL2, CCL21, CCL22, CCL4, CCL5, Ccl6, CCR3, CCR6, CCR7, CD4, CD40, CD44, CD8A, CLEC4E, CX3CR1, CXCL10, CXCL11, CXCL16, CXCL3, CXCR3, CXCR4, FCER1A, FN1, FOS, HDC, ICAM1, IL10, IL12A, IL16, IL18, IL1B, IL1R1, IL6, LEP, MYD88, OSM, PRKCQ, PYCARD, SELE, SELL, SELP, SELPLG, SGPL1, TLR2, TLR9, TNF, TNFRSF8, TNFRSF9, VIP	54		Cellular Movement	cell movement	cell movement of cancer cells	5.87e-12	ALCAM, BDNF, CCL2, CCL21, CCL5, CCR7, CD44, CD97, CDK1, COL18A1, CSF1R, CSF2RA, CSF3R, CTSB, CXCL11, CXCR4, DCDC2, DDR1, EZH2, EZR, F2RL1, FN1, FOXM1, GDNF, GSN, HGF, HMMR, HPSE, IL11, IL6, LSP1, LYN, MAP3K1, MET, MGLL, MIF, MMP13, MMP2, MMP9, NRP1, PAK1, PARP9, PRKCA, RAPGEF3, SELE, SEMA4D, SOX2, SPARC, SPHK1, TGFA, TGFBR1, THBS1, THRB, TNC, VCAN, VIM, WISP1, WISP2, ZBTB16	59		Tissue Morphology	morphology	morphology of lymph node	5e-21	ALOX15, ANGPTL4, ATM, B3GNT5, Bst2, CASP8, CCL21, CCR6, CCR7, CCR9, CD247, CD40, CD74, CD80, CD86, CEBPE, CYP27B1, DCLRE1C, ESR2, FCGR2B, FOXC2, FUT7, FZD9, HLA-DQA1, HLA-DQB1, HMOX1, ICOS, IL10, IL10RB, IL2RB, IL2RG, INPP5D, IRF4, IRF8, ITGB2, JAK3, LAT, LIPA, LTB, LYN, MAP3K14, MGAT2, NOD2, NOS2, NPY1R, PIK3CD, PLCD1, PRF1, PSEN2, PTPN22, PTPRCAP, RASSF5, RIPK3, RNF128, SATB1, SELE, SELL, SELP,…	68
Immune Cell Trafficking	infiltration	infiltration of granulocytes	1.95e-20	ADAM17, ADIPOQ, ADRB3, ADRBK1, AGT, ALOX5AP, ANXA1, APOE, ARRB2, B4GALT1, C2, C3, C4A/C4B, CASP1, CBFB, CCL21, CCL4, CCR7, CD14, CD2, CD44, CFB, CFH, CMKLR1, CTSB, CXCL10, CXCL2, CXCL3, CXCR2, F2R, F2RL1, FABP4, FAS, FCER1G, FPR1, FUT4, FUT7, GJB2, HCK, HGF, HIF1A, HMOX1, ICAM1, IKBKG, IL10, IL17RA, IL18, IL1A, IL1B, IL1R1, IL1RL1, IL1RN, IL2RB, IL33, IL4R, IL6, IL6R, ITGAL, ITGAM, ITGB2, JAK3, L…	115		Hematological System Development and Function	recruitment	recruitment of mononuclear leukocytes	4.85e-13	AGT, AOC3, APOE, CASP1, CCL17, CCL19, Ccl2, CCL2, CCL21, CCL22, CCL4, CCL5, Ccl6, CCR3, CCR6, CCR7, CD4, CD40, CD44, CD8A, CLEC4E, CX3CR1, CXCL10, CXCL11, CXCL16, CXCL3, CXCR3, CXCR4, FCER1A, FCGR2B, FN1, FOS, HDC, ICAM1, IL10, IL12A, IL16, IL18, IL1B, IL1R1, IL21, IL6, ITGA4, LEP, MYD88, NLRP3, NOD2, OSM, PRKCQ, PYCARD, SELE, SELL, SELP, SELPLG, SGPL1, TLR2, TLR9, TNF, TNFRSF1B, TNFRSF8, TNFRSF9…	62		Cellular Movement	migration	leukocyte migration	2.86e-58	ABCA1, Abcb1b, ABCB4, ACKR2, ADA, ADAM17, ADIPOQ, ADORA1, AGT, AHR, AIF1, ALCAM, ANGPT1, ANXA1, AOC3, APOE, ARG1, BACH2, BATF, BCL11B, BDKRB1, BID, BTK, BTLA, C2, C3, C5AR1, C5AR2, C6, CAPG, CARD9, CASP1, CBFB, CCL17, CCL19, CCL2, Ccl2, CCL21, CCL22, CCL3L3, CCL4, CCL5, Ccl6, Ccl7, Ccl9, CCND1, CCR4, CCR6, CCR7, CCR9, CD14, CD1D, CD2, CD226, CD247, CD28, CD3E, CD4, CD40, CD44, CD5L, CD63, CD69, C…	382		Tissue Morphology	morphology	morphology of connective tissue	8.39e-14	ABCA1, ABCG1, ACTA2, ADIPOQ, ADRB1, ADRB3, ALPL, APOE, ARNTL, ARSB, ATP6V0D2, B4GALT1, BBC3, BCL11B, BIRC2, BIRC3, BMP7, Ccl2, CD68, CHSY1, CIDEC, CLCN3, CLCN7, COL11A2, COL9A1, CREB3L1, CSF1R, CTSK, CTSV, CXADR, CYP26A1, DLK1, DLX3, DOK1, ELN, ELOVL4, EPB42, ERRFI1, ESR2, FBXO2, FMOD, FOXC2, GDF3, GPR65, GPR68, GSN, HBA1/HBA2, HBB, HGF, HMGA1, HSD11B1, IL10, IL1RN, IL2RG, INPP5D, ITGA4, ITGA8, L…	127
Immune Cell Trafficking	infiltration	infiltration by neutrophils	5.28e-19	ADAM17, ADIPOQ, ADRB3, ADRBK1, AGT, ALOX5AP, ANXA1, APOE, B4GALT1, C2, C3, C4A/C4B, CASP1, CCL21, CCL4, CD14, CD44, CFB, CFH, CMKLR1, CTSB, CXCL10, CXCL2, CXCL3, CXCR2, F2RL1, FABP4, FAS, FCER1G, FPR1, FUT4, FUT7, GJB2, HGF, HMOX1, ICAM1, IL10, IL17RA, IL18, IL1A, IL1B, IL1R1, IL1RN, IL33, IL6, IL6R, ITGAL, ITGAM, ITGB2, JAK3, LGALS1, LTB4R, MAP3K8, MDK, MMP12, MMP8, MMP9, MYD88, NCF1, NOS2, NT5E…	91		Hematological System Development and Function	blood pressure	blood pressure	2.57e-26	ABAT, ABCC9, ACE, ACE2, ACTA2, ADCY6, ADD2, ADIPOQ, ADM, ADORA1, ADRA1A, ADRA1B, ADRA1D, ADRA2B, ADRB1, ADRB3, ADRBK1, AGT, Agtr1b, AHR, ALOX12, AOC3, APEX1, APLN, APLNR, APOE, ARG2, ARNTL, ARSB, ATP1A2, AVPR2, BCHE, BDKRB1, BDNF, CACNA1B, CACNA1C, CACNB3, CAV1, CD44, Cdkn1c, CHGA, CKM, CNR1, COL1A2, COL4A3, CRHR2, CRYAB, CYBA, CYBB, DBP, DDAH1, EGLN3, ELN, EPHB6, EPHX2, ERAP1, ESR2, F2R, F2RL1, …	162		Cellular Movement	migration	migration of cells	3.42e-56	A2M, ABCA1, Abcb1b, ABCB4, ABI3, Acan, ACKR2, ACP5, ACSL4, ACTA2, ACTR3, ADA, ADAM17, ADAM19, ADAMTS7, ADARB1, ADIPOQ, ADORA1, AGT, AHR, AIF1, AJUBA, ALCAM, ALK, ALOX12, ALOX15B, ANGPT1, ANGPT4, ANGPTL3, ANPEP, ANXA1, AOC3, APLN, APOE, AQP5, ARG1, ARHGAP31, ARHGAP4, ARX, ASPM, ASTN1, ATF3, ATG12, ATM, AURKA, BACH2, BATF, BCL11B, BDKRB1, BDKRB2, BDNF, BID, BMP10, BMP4, BMP6, BMX, BRCA1, BRCA2, BTC…	664		Tissue Morphology	abnormal quantity	abnormal quantity of leukocytes	2.01e-17	APOE, BCL2L11, BIRC3, CCR6, CCR9, CD247, CD4, CD74, CD80, CD86, CD8A, CSF1R, CXCL10, DLK1, ESR2, FCGR2A, FES, HMOX1, ICOS, IL10, IL1RN, IL2RG, IRF1, IRF8, ITGAD, ITGAM, JAK3, LCK, MS4A1, NOS2, NPY1R, PTPRC, RHOH, SELE, SELL, SELP, SH3BP2, SIGLEC1, SIT1, SPI1, SYK, TAP1, VAV1, ZBTB7B	44
Immune Cell Trafficking	infiltration	infiltration by mononuclear leukocytes	2.18e-13	AGT, APOE, APP, ARRB2, BGN, C3, CBFB, Ccl2, CCL2, CCL21, CCL22, CCL3L3, CCL4, CCR7, CD44, CD80, CD86, CIITA, COL4A3, CXCL10, CXCL16, ESR1, ESR2, F2RL1, FAS, FOXP3, GJB2, HCK, HLA-A, HMOX1, ICOS, IKBKG, IL10, IL11RA, IL16, IL17C, IL17RA, IL18, IL18BP, IL1B, IL33, IL6, ITGA1, ITGA4, JAK3, KCNK2, LGALS1, LTB, MMP12, MMP9, MYD88, MYLK, NFATC2, NFKB1, NFKBIZ, NLRP3, NTN1, OLFM4, OSM, PF4, PIK3CD, PIK3…	87		Hematological System Development and Function	homeostasis	T cell homeostasis	4.02e-26	ADA, ADAM17, AHR, ANXA1, APAF1, ATM, B2M, BATF, BAX, BCL11A, BCL11B, BCL2A1, BCL2L11, BCL3, BIRC5, BMF, BMP4, BRCA1, C5AR1, CASP1, CASP3, CASP8, CBFB, CCL19, CCNB2, CCND1, CCR7, CCR9, CD1D, CD2, CD226, CD244, CD247, CD28, CD38, CD3D, CD3E, CD3G, CD4, CD5, CD6, CD69, CD80, CD83, CD86, CD8A, CD8B, CDK2, CDKN1A, CDKN1B, CDKN2A, CEBPA, CHEK1, CHRD, CHST3, CIITA, CISH, CNR2, CORO1A, CTLA4, CXCR4, DCK,…	251		Cellular Movement	migration	migration of mononuclear leukocytes	2.23e-29	ABCA1, Abcb1b, ACKR2, ADAM17, AGT, ANXA1, AOC3, BACH2, BATF, BCL11B, BTK, C3, C6, CCL17, CCL19, Ccl2, CCL2, CCL21, CCL22, CCL3L3, CCL4, CCL5, Ccl6, CCR4, CCR6, CCR7, CCR9, CD1D, CD2, CD226, CD247, CD28, CD3E, CD4, CD40, CD44, CD69, CD80, CD86, CD8A, COL1A1, COL4A3, CTSS, CTSV, CX3CR1, CXCL10, CXCL11, CXCL16, CXCL3, Cxcl9, CXCR3, CXCR4, CYSLTR1, CYTIP, DOCK8, ESR2, EZR, F2RL1, FAM65B, FASLG, FERMT…	161		Tissue Morphology	abnormal quantity	abnormal quantity of lymphocytes	1.92e-14	APOE, BCL2L11, CCR6, CCR9, CD247, CD4, CD74, CD80, CD86, CD8A, CXCL10, DLK1, ESR2, ICOS, IL10, IL2RG, IRF1, IRF8, ITGAD, ITGAM, JAK3, LCK, MS4A1, NPY1R, PTPRC, RHOH, SELL, SH3BP2, SIGLEC1, SIT1, SPI1, SYK, TAP1, VAV1, ZBTB7B	35
Immune Cell Trafficking	adhesion	adhesion of immune cells	2.56e-25	A2M, ADAM17, ADIPOQ, ADORA1, AGT, ALCAM, ANXA1, AOC3, APOE, APP, B4GALT1, BPI, BTK, C3, CAMP, Ccl2, CCL2, CCL20, CCL21, CCL22, CCL3L3, CCL4, CCNC, CCND1, CCR3, CCR7, CD14, CD2, CD200R1, CD209, Cd24a, CD300LD, CD34, CD38, CD40, CD44, CD6, CD83, CD9, CD97, CDH1, CERCAM, CHST4, CLEC10A, Cmah, CNR2, CORO1A, CSF2RB, CSF3R, CSK, CTSZ, CX3CR1, CXCL10, CXCL11, CXCL13, CXCL2, CXCL3, CXCR2, CXCR3, CXCR4, D…	182		Hematological System Development and Function	development	development of mononuclear leukocytes	1.63e-25	ABCG1, ADA, ADAM17, ADM, AHR, ANXA1, APAF1, ATM, B2M, BATF, BAX, BCL11A, BCL11B, BCL2A1, BCL2L11, BCL3, BIRC5, BLNK, BMP4, BRCA1, BST1, BTK, C5AR1, CASP1, CASP8, CBFB, CCND1, CCR7, CCR9, CD1D, CD2, CD226, CD244, CD247, Cd24a, CD28, CD3D, CD3E, CD3G, CD4, CD5, CD6, CD69, CD80, CD83, CD86, CD8A, CD8B, CDK2, CDKN1A, CDKN1B, CDKN2A, CEBPA, CHEK1, CHRD, CIITA, CISH, CLEC11A, CNR2, CR2, CSF2RB, CSF3R, …	266		Cellular Movement	migration	Lymphocyte migration	1.75e-28	Abcb1b, ACKR2, ADAM17, AGT, ANXA1, AOC3, BACH2, BATF, BCL11B, BTK, C3, C6, CCL17, CCL19, Ccl2, CCL2, CCL21, CCL22, CCL3L3, CCL4, CCL5, Ccl6, CCR4, CCR6, CCR7, CCR9, CD1D, CD2, CD226, CD247, CD28, CD3E, CD4, CD40, CD44, CD69, CD80, CD86, CD8A, COL1A1, COL4A3, CTSS, CTSV, CX3CR1, CXCL10, CXCL11, CXCL16, CXCL3, Cxcl9, CXCR3, CXCR4, CYSLTR1, CYTIP, DOCK8, ESR2, EZR, F2RL1, FAM65B, FASLG, FERMT3, FN1,…	151		Cellular Function and Maintenance	function	function of leukocytes	2.62e-77	ABCB1, Abcb1b, ADA, ADGRE1, ADIPOQ, AHR, ANG, ANPEP, APOE, ATF3, ATM, B4GALT1, BACH2, BANK1, BATF3, BBC3, BCL2A1, BCL2L11, BIRC3, BIRC5, BST1, BTK, BTLA, C3, C5AR2, CACNB3, CAPG, CARD9, CASP8, CCL2, Ccl2, CCL5, CCR6, CCR7, CD14, CD200R1, CD244, CD247, CD27, CD274, CD28, CD300A, CD300LF, CD3E, CD3G, CD4, CD40, CD44, CD69, CD72, CD74, CD80, CD84, CD86, CD8A, CD8B, CEBPE, CLCN3, CLEC4E, CLEC7A, Cmah…	261
Immune Cell Trafficking	adhesion	adhesion of lymphocytes	6.59e-13	ANXA1, AOC3, BTK, CCL2, CCL20, CCL21, CCL22, CCL4, CCR7, CD2, CD209, CD44, CHST4, CXCL11, CXCR3, DCN, DIAPH1, EZR, FAM65B, FAS, FERMT3, FUT4, FUT7, FYB, HGF, ICAM1, ICAM2, ICOS, IL11, IL1B, IL6, IL6R, ITGA4, ITGA5, ITGAL, ITGB2, JAK2, JAK3, LIF, Ly6a (includes others), MAP2K1, MAP4K1, MYD88, NTN1, OSM, PLAU, PTPN6, RALGDS, RASGRP1, RASSF5, RGS1, SELE, SELL, SELP, SELPLG, SIPA1, SPN, TGFB1, THBS1,…	62		Hematological System Development and Function	development	development of leukocytes	6.1e-25	ABCG1, ADA, ADAM17, ADM, AHR, ALOX15, ANXA1, APAF1, ATM, B2M, BATF, BAX, BCL11A, BCL11B, BCL2A1, BCL2L11, BCL3, BIRC5, BLNK, BMP4, BRCA1, BST1, BTK, C5AR1, CASP1, CASP8, CBFB, CCND1, CCR7, CCR9, CD1D, CD2, CD226, CD244, CD247, Cd24a, CD28, CD3D, CD3E, CD3G, CD4, CD5, CD6, CD69, CD80, CD83, CD86, CD8A, CD8B, CD9, CDK2, CDKN1A, CDKN1B, CDKN2A, CEBPA, CHEK1, CHRD, CIITA, CISH, CLEC11A, CNR2, CR2, CS…	276		Cellular Movement	migration	T cell migration	4.21e-25	Abcb1b, ACKR2, ADAM17, AGT, AOC3, BACH2, BATF, BCL11B, C3, C6, CCL17, CCL19, Ccl2, CCL2, CCL21, CCL22, CCL3L3, CCL4, CCL5, CCR4, CCR6, CCR7, CCR9, CD28, CD4, CD40, CD44, CD69, CD80, CD86, COL1A1, COL4A3, CTSS, CTSV, CXCL10, CXCL11, CXCL16, Cxcl9, CXCR3, CXCR4, CYSLTR1, DOCK8, ESR2, EZR, F2RL1, FAM65B, FASLG, FN1, FOXO1, FUT4, FUT7, FYB, GNRH1, GRK6, HGF, HLA-A, ICAM1, ICOS, IL16, IL17C, IL17RA, I…	115		Cellular Function and Maintenance	function	function of blood cells	6.41e-75	ABCA1, ABCB1, Abcb1b, ADA, ADGRE1, ADIPOQ, AHR, ANG, ANPEP, APOE, ATF3, ATM, B4GALT1, BACH2, BANK1, BATF3, BBC3, BCL2A1, BCL2L11, BIRC3, BIRC5, BST1, BTK, BTLA, C3, C5AR2, CACNB3, CAPG, CARD9, CASP8, CCL2, Ccl2, CCL5, CCR6, CCR7, CD14, CD200R1, CD244, CD247, CD27, CD274, CD28, CD300A, CD300LF, CD3E, CD3G, CD4, CD40, CD44, CD69, CD72, CD74, CD80, CD84, CD86, CD8A, CD8B, CEBPE, CLCN3, CLEC4E, CLEC7…	272
Immune Cell Trafficking	adhesion	adhesion of mononuclear leukocytes	7.44e-13	AGT, ANXA1, AOC3, BTK, CCL2, CCL20, CCL21, CCL22, CCL4, CCR7, CD2, CD209, CD34, CD44, CHST4, CXCL11, CXCR3, DCN, DIAPH1, EZR, FAM65B, FAS, FERMT3, FOXO1, FUT4, FUT7, FYB, HGF, ICAM1, ICAM2, ICOS, IL10, IL11, IL1A, IL1B, IL6, IL6R, ITGA4, ITGA5, ITGAL, ITGAM, ITGB2, JAK2, JAK3, LCP1, LIF, LIPG, Ly6a (includes others), MAP2K1, MAP4K1, MYD88, NTN1, OSM, PLAU, PLAUR, PTPN6, RALGDS, RASGRP1, RASSF5, R…	74		Hematological System Development and Function	development	development of lymphocytes	6.43e-25	ABCG1, ADA, ADAM17, AHR, ANXA1, APAF1, ATM, B2M, BATF, BAX, BCL11A, BCL11B, BCL2A1, BCL2L11, BCL3, BIRC5, BLNK, BMP4, BRCA1, BST1, BTK, C5AR1, CASP1, CASP8, CBFB, CCND1, CCR7, CCR9, CD1D, CD2, CD226, CD244, CD247, Cd24a, CD28, CD3D, CD3E, CD3G, CD4, CD5, CD6, CD69, CD80, CD83, CD86, CD8A, CD8B, CDK2, CDKN1A, CDKN1B, CDKN2A, CEBPA, CHEK1, CHRD, CIITA, CISH, CLEC11A, CNR2, CR2, CSF3R, CTLA4, CXCR4,…	263		Cellular Movement	migration	migration of phagocytes	4.68e-21	ABCA1, ADAM17, ADIPOQ, AGT, ALCAM, ANGPT1, ANXA1, AOC3, APOE, C3, CCL17, CCL19, Ccl2, CCL2, CCL21, CCL22, CCL3L3, CCL4, CCL5, Ccl9, CCND1, CCR7, CD40, CD44, CD80, CD86, CDH1, CLEC11A, CLEC4M, COL1A1, CSF1R, CTSS, CTSV, CTSZ, CX3CR1, CXCL10, CXCL11, CXCL2, CXCL3, CXCL6, CXCR3, CXCR4, CYBB, DOCK8, F10, FASLG, FGR, FN1, GREM1, HCK, HCLS1, HGF, ICAM1, ICOS, IL10RA, IL16, IL17RA, IL18, IL1B, IL1RN, IL…	115		Cellular Function and Maintenance	function	function of mononuclear leukocytes	6.18e-51	ABCB1, Abcb1b, ADGRE1, AHR, ANG, APOE, ATF3, ATM, BACH2, BANK1, BATF3, BBC3, BCL2L11, BIRC3, BIRC5, BST1, BTK, BTLA, CACNB3, Ccl2, CCL2, CCR6, CCR7, CD244, CD247, CD27, CD274, CD28, CD3E, CD3G, CD4, CD40, CD44, CD69, CD72, CD74, CD80, CD84, CD86, CD8A, CD8B, Cmah, CNR2, CTSC, CTSS, CX3CR1, CXCL10, CXCL13, CXCR4, EBI3, ECM1, FCER1G, FCGR2A, FYB, GRK6, HAVCR2, HCLS1, HLA-A, HLA-DQB1, HLA-E, HLA-G, …	164
Immune Cell Trafficking	accumulation	accumulation of leukocytes	4.31e-24	ACKR2, ACKR3, ADIPOQ, AGT, AHR, AICDA, AIMP1, ANXA1, APOE, ARRB2, BCL2A1, BCL2L11, BCL3, BGN, C4A/C4B, C5AR1, CASP8, Ccl2, CCL2, CCL21, CCL24, CCL3L3, Ccl7, CCR3, CCR7, CD1D, CD27, CD274, CD40, CD44, CD80, CD86, CD97, COL18A1, CTSC, CX3CR1, CXCL10, CXCL2, CXCL3, CXCR2, CXCR3, CXCR4, CYBB, DDR1, DEF6, DOCK8, ENPP2, ENTPD1, F2R, FAS, FCGR2A, FCGR3A/FCGR3B, FGF1, FOSL1, FOXO3, Gm21596/Hmgb1, GPR17, …	143		Hematological System Development and Function	development	development of blood cells	3.66e-24	ABCG1, ADA, ADAM17, ADD2, ADM, AHR, ALOX15, ANGPT1, ANK1, ANXA1, APAF1, ATM, B2M, BATF, BAX, BCHE, BCL11A, BCL11B, BCL2A1, BCL2L11, BCL3, BIRC5, BLNK, BMP4, BRCA1, BRCA2, BST1, BTK, C5AR1, CASP1, CASP8, CBFB, CCND1, CCR7, CCR9, CD1D, CD2, CD226, CD244, CD247, Cd24a, CD28, CD3D, CD3E, CD3G, CD4, CD5, CD6, CD69, CD80, CD83, CD86, CD8A, CD8B, CD9, CDK2, CDKN1A, CDKN1B, CDKN2A, CEBPA, CHEK1, CHRD, CI…	299		Cellular Movement	migration	migration of antigen presenting cells	2.83e-14	ADIPOQ, AGT, ALCAM, APOE, C3, CCL17, CCL19, Ccl2, CCL2, CCL21, CCL22, CCL3L3, CCL4, CCL5, Ccl9, CCND1, CCR7, CD40, CD44, CD80, CD86, CDH1, CLEC4M, CSF1R, CTSZ, CXCL10, CXCL11, CXCR3, CXCR4, CYBB, DOCK8, HCLS1, HGF, ICAM1, ICOS, IL10RA, IL16, IL18, IL1B, IL1RN, IL21R, IRF6, ITGAL, LGALS3, MDK, MIF, MMP12, MST1, MYLK, NLRP10, NOS2, P2RY6, PDPN, PTGDS, PTK2B, PTPN6, RAC2, RUNX3, S1PR4, SDC1, SELE, S…	70		Cellular Function and Maintenance	function	function of lymphocytes	1.54e-50	ABCB1, Abcb1b, ADGRE1, AHR, ANG, APOE, ATF3, ATM, BACH2, BANK1, BATF3, BBC3, BCL2L11, BIRC3, BIRC5, BST1, BTK, BTLA, CACNB3, Ccl2, CCR6, CCR7, CD244, CD247, CD27, CD274, CD28, CD3E, CD3G, CD4, CD40, CD44, CD69, CD72, CD74, CD80, CD84, CD86, CD8A, CD8B, Cmah, CNR2, CTSC, CTSS, CX3CR1, CXCL10, CXCL13, CXCR4, EBI3, ECM1, FCER1G, FCGR2A, FYB, GRK6, HAVCR2, HCLS1, HLA-A, HLA-DQB1, HLA-E, HLA-G, HSH2D,…	163
Immune Cell Trafficking	accumulation	accumulation of phagocytes	1.97e-16	ACKR3, AGT, AHR, AIMP1, ANXA1, APOE, C5AR1, Ccl2, CCL2, CCL21, CD40, CD44, COL18A1, CTSC, CX3CR1, CXCL10, CXCL2, CXCL3, DDR1, DOCK8, ENTPD1, F2R, FAS, FCGR2A, FCGR3A/FCGR3B, FGF1, FOSL1, Gm21596/Hmgb1, GRN, HAVCR2, HMOX1, IFNAR1, IL10, IL17RA, IL18, IL1B, IL1R1, IL1RN, IL33, INPP5D, IRF1, ITGA1, ITGA4, ITGA5, ITGA6, ITGAM, ITGB2, MAPK13, MMP3, MMP9, MYD88, NLRP12, NOS2, NR4A1, NT5E, PFN1, PLAU, P…	78		Hematological System Development and Function	development	T cell development	4.07e-24	ADA, ADAM17, AHR, ANXA1, APAF1, ATM, B2M, BATF, BAX, BCL11A, BCL11B, BCL2A1, BCL2L11, BCL3, BIRC5, BMP4, BRCA1, C5AR1, CASP1, CBFB, CCND1, CCR7, CCR9, CD1D, CD2, CD226, CD244, CD247, CD28, CD3D, CD3E, CD3G, CD4, CD5, CD6, CD69, CD80, CD83, CD86, CD8A, CD8B, CDK2, CDKN1A, CDKN1B, CDKN2A, CEBPA, CHEK1, CHRD, CIITA, CISH, CNR2, CTLA4, CXCR4, DCK, DCLRE1C, DEF6, DLL1, DNASE2, DNMT1, DNTT, DOK1, DOK2,…	241		Cellular Movement	migration	migration of myeloid cells	5.51e-12	ADAM17, ADORA1, ANXA1, AOC3, C3, CCL17, Ccl2, CCL2, CCL3L3, CCL4, CCL5, CD44, CLEC11A, CXCL10, CXCL11, CXCL2, CXCL3, CXCL6, CYBB, F10, FASLG, FGR, FN1, HCK, HMOX1, ICAM1, IL16, IL17RA, IL18, IL1B, IL6, INPP5D, ITGA4, ITGAL, ITGAM, ITGB2, LEP, LSP1, MDK, MMP7, MMP9, MYLK, NLRP3, NOS2, P2RY6, PDE4B, PIK3CD, PIK3R1, PIK3R5, PLAUR, PLCB2, PRKCQ, PTGDS, S100A8, S100A9, SELE, SELL, SELP, SELPLG, SEMA4D…	62		Cellular Function and Maintenance	function	function of phagocytes	5.36e-46	ADA, AHR, ANPEP, APOE, ATM, B4GALT1, BATF3, BCL2A1, BIRC3, BTK, C3, CAPG, CARD9, CASP8, CCL2, Ccl2, CCL5, CCR6, CCR7, CD14, CD200R1, CD274, CD300A, CD300LF, CD40, CEBPE, CLCN3, CLEC4E, CLEC7A, CNR2, CSF1R, CTSZ, CXCL10, CYBB, DOCK8, DOK1, DOK2, DUSP2, FCER1G, FCGR1A, FCGR2A, FCGR2B, FES, FGR, FOS, FUT7, GPR68, GRN, GSN, HAVCR2, HCK, HGF, HLA-G, HSPB1, ICAM1, IFIH1, IL10, IL12B, IL18, IL1B, IL1R1,…	146
Immune Cell Trafficking	accumulation	accumulation of lymphocytes	1.36e-15	ACKR2, ADIPOQ, AGT, AICDA, APOE, ARRB2, BCL2L11, BCL3, BGN, C4A/C4B, CASP8, Ccl2, CCL2, CCL21, CCL3L3, CCR7, CD1D, CD27, CD274, CD40, CD80, CD86, CX3CR1, CXCL10, CXCL3, CXCR2, CXCR3, CXCR4, DEF6, ENPP2, ENTPD1, FAS, FOXO3, ICAM1, ICOS, IER3, IFNAR1, IL10RA, IL11, IL17RA, IL21R, IL2RG, IL33, IL6, ITGAL, ITGB2, LAT, MYD88, NFATC2, NT5E, PRKCQ, PTPN1, RASGRP1, RBPJ, RGS16, RIPK3, RUNX3, SELE, SELL, …	71		Hematological System Development and Function	development	development of hematopoietic system	1.99e-14	ABCG2, ADAM17, ALOX15, AVPR2, B2M, BAX, BCHE, BCL11B, BCL2L11, BIRC5, BLNK, BRCA1, BTK, CASP3, CBFB, CCND1, CCR9, CD3D, CD3E, CD3G, CD40, CD44, CD83, CDKN1A, CDKN1B, CDKN2A, CEBPA, CLEC11A, CSF2RB, CSF3R, CXCR4, DCK, DLL1, E2F1, EEF1D, EGR2, EIF2AK2, F5, FASLG, FLT3, FOS, FOXO1, GATA1, GATA2, GATA3, GRAP2, Gsta4, ICOS, IFNAR1, IL10, IL11, IL1RN, IL2RB, IL2RG, IL6, IL7R, IRF1, JAK2, JAK3, KIAA0101…	115		Cellular Movement	migration	NK cell migration	1.18e-11	Ccl2, CCL2, CCL21, CCL22, CCL3L3, CCL5, Ccl6, CCR7, CD1D, CD226, CD40, CD44, CX3CR1, CXCL10, CXCR3, FERMT3, HLA-G, IL16, PIK3CD, PRKCQ, S1PR5, SELE, SELL, SELP, TLR2, TNF, XCL1	27		Cellular Function and Maintenance	function	function of antigen presenting cells	1.87e-39	ADA, AHR, ANPEP, APOE, ATM, BATF3, BIRC3, BTK, CAPG, CARD9, CASP8, CCL2, Ccl2, CCL5, CCR6, CCR7, CD14, CD200R1, CD274, CD40, CD74, CLCN3, CLEC4E, CLEC7A, CNR2, CSF1R, CTSS, CTSZ, CXCL10, CYBB, DOCK8, DOK1, DOK2, FCER1G, FCGR1A, FCGR2A, FCGR2B, FES, FGR, FOS, GPR68, GRN, GSN, HCK, HGF, HSPB1, ICAM1, IFI30, IFIH1, IL10, IL12B, IL18, IL1B, IL21R, IL2RG, IL4R, IRF1, ITGAD, ITGAM, JAK3, LCP1, LGALS3, …	118
Immune Cell Trafficking	accumulation	accumulation of mononuclear leukocytes	2.87e-15	ACKR2, ADIPOQ, AGT, AICDA, APOE, ARRB2, BCL2L11, BCL3, BGN, C4A/C4B, CASP8, Ccl2, CCL2, CCL21, CCL3L3, CCR7, CD1D, CD27, CD274, CD40, CD80, CD86, CX3CR1, CXCL10, CXCL2, CXCL3, CXCR2, CXCR3, CXCR4, DEF6, ENPP2, ENTPD1, FAS, FOXO3, ICAM1, ICOS, IER3, IFNAR1, IL10RA, IL11, IL17RA, IL18, IL21R, IL2RG, IL33, IL6, ITGA1, ITGAL, ITGB2, LAT, MYD88, NFATC2, NT5E, PRKCQ, PTGDS, PTPN1, RASGRP1, RBPJ, RGS16,…	75		Hematological System Development and Function	development	development of hematopoietic cells	3.14e-13	ADAM17, ALOX15, B2M, BAX, BCHE, BCL11B, BCL2L11, BIRC5, BLNK, BRCA1, BTK, CBFB, CCND1, CCR9, CD3D, CD3E, CD3G, CD83, CDKN1A, CDKN1B, CDKN2A, CLEC11A, CSF2RB, CSF3R, CXCR4, DCK, DLL1, E2F1, EEF1D, EGR2, EIF2AK2, F5, FLT3, FOXO1, GATA1, GATA2, GATA3, GRAP2, ICOS, IFNAR1, IL10, IL2RB, IL2RG, IL6, IL7R, IRF1, JAK2, JAK3, KIAA0101, KIT, Klra4 (includes others), LAT, LAT2, LAX1, LCP2, LFNG, LMO2, LYN, …	92		Cellular Movement	migration	migration of tumor cells	2.55e-11	ADIPOQ, ALCAM, BDNF, CCL2, CCL21, CCL5, CCR7, CD44, CD97, CDK1, CLCN3, CNTN2, COL18A1, CSF1R, CSF2RA, CSF3R, CST6, CTSB, CX3CR1, CXCL10, CXCL11, CXCR4, DCDC2, DDR1, EPHB2, ESR2, EZH2, EZR, F2RL1, FN1, FOXM1, GDNF, GSN, GZMB, HGF, HMMR, HPSE, IL11, IL6, LEP, LGALS3, LGR4, LSP1, LYN, MAP3K1, MET, MGLL, MIF, MMP13, MMP2, MMP9, NRP1, OSM, PAK1, PARP9, PLAUR, PLCD1, POSTN, PRKCA, PROX1, RAPGEF3, RET, …	81		Cellular Function and Maintenance	function	function of myeloid cells	4.26e-37	ADIPOQ, AHR, ANPEP, APOE, ATM, B4GALT1, BCL2A1, BIRC3, CAPG, CARD9, CASP8, Ccl2, CCL2, CCL5, CCR6, CD14, CEBPE, CLCN3, CLEC4E, CLEC7A, CNR2, CSF1R, CXCL10, CYBB, DOK1, DOK2, FCER1G, FCGR1A, FCGR2A, FCGR2B, FCMR, FES, FGR, FOS, FUT7, GPR68, GRN, GSN, HCK, HLA-G, HSPB1, ICAM1, IL10, IL12B, IL18, IL1B, IL1R1, IL2RG, IL4R, IRF1, ITGAD, ITGAL, ITGAM, ITGB2, LCP1, LGALS3, LGMN, Lilrb3, LY96, LYN, MMP12…	113
Immune Cell Trafficking	accumulation	accumulation of myeloid cells	3.31e-15	ACKR3, ADIPOQ, AGT, AHR, AIMP1, ANXA1, APOE, BCL2A1, C5AR1, Ccl2, CCL2, CCL24, Ccl7, CCR3, CD40, CD44, CD97, COL18A1, CTSC, CX3CR1, CXCL10, CXCL2, CXCL3, DDR1, ENTPD1, F2R, FAS, FCGR2A, FCGR3A/FCGR3B, FGF1, FOSL1, Gm21596/Hmgb1, GRN, HAVCR2, HMOX1, IFNAR1, IL10, IL11, IL17RA, IL18, IL1B, IL1R1, IL1RN, IL33, INPP5D, IRF1, ITGA1, ITGA4, ITGA5, ITGA6, ITGAM, ITGB2, JAK2, MAPK13, MAPK3, MMP3, MMP8, M…	89		Hematological System Development and Function	development	development of hematopoietic progenitor cells	3.69e-13	ADAM17, ALOX15, B2M, BAX, BCHE, BCL11B, BCL2L11, BIRC5, BLNK, BRCA1, BTK, CBFB, CCND1, CCR9, CD3D, CD3E, CD3G, CD83, CDKN1A, CDKN1B, CDKN2A, CLEC11A, CSF2RB, CSF3R, CXCR4, DCK, DLL1, E2F1, EEF1D, EGR2, EIF2AK2, F5, FLT3, FOXO1, GATA1, GATA2, GATA3, GRAP2, ICOS, IFNAR1, IL10, IL2RB, IL2RG, IL6, IL7R, IRF1, JAK3, KIAA0101, KIT, Klra4 (includes others), LAT, LAT2, LAX1, LCP2, LFNG, LMO2, LYN, MLLT11…	90		Cellular Movement	homing	homing of cells	4.8e-34	ACKR2, ADAM17, ADORA1, AGT, AIF1, AKAP12, ANGPT1, ANXA1, AOC3, APLN, APLNR, APOE, BATF, BDNF, BIN2, BMP4, C3, C5AR1, C5AR2, CAPG, CCL17, CCL19, CCL2, Ccl2, CCL21, CCL22, CCL3L3, CCL4, CCL5, Ccl6, Ccl9, CCND1, CCR4, CCR6, CCR7, CCR9, CD28, CD4, CD44, CD69, CD9, CDKN1A, CKLF, CLCN3, CNR1, CNR2, COL4A3, CORO1A, CSF1R, CSF2RA, CSF3R, CST3, CTSE, CX3CR1, CXADR, CXCL10, CXCL11, CXCL14, CXCL16, CXCL2, C…	231		Cellular Function and Maintenance	function	function of T lymphocytes	8.17e-36	ABCB1, Abcb1b, ADGRE1, ANG, ATF3, ATM, BATF3, BBC3, BCL2L11, BIRC3, BIRC5, CACNB3, Ccl2, CCR6, CCR7, CD247, CD27, CD274, CD28, CD3E, CD3G, CD4, CD44, CD69, CD74, CD80, CD84, CD86, CD8A, CD8B, Cmah, CTSC, CTSS, CXCL10, EBI3, ECM1, FCER1G, FYB, GRK6, HAVCR2, HLA-A, HLA-DQB1, HLA-E, HLA-G, HSH2D, ICAM1, ICOS, IFNGR2, IL10, IL10RA, IL12B, IL13RA1, IL18, IL18R1, IL21R, IL4R, INPP5D, IRF5, IRF7, IRF8, …	118
Immune Cell Trafficking	accumulation	accumulation of granulocytes	4.64e-14	ADIPOQ, AGT, AHR, ANXA1, BCL2A1, C5AR1, Ccl2, CCL2, CCL24, Ccl7, CCR3, CD97, CTSC, CXCL10, CXCL2, CXCL3, FCGR2A, FCGR3A/FCGR3B, Gm21596/Hmgb1, GRN, HAVCR2, IL10, IL11, IL17RA, IL18, IL1B, IL1R1, IL1RN, IL33, INPP5D, ITGA4, ITGA5, ITGA6, ITGAM, ITGB2, MAPK13, MAPK3, MMP8, MMP9, MYD88, NCF1, NLRP12, NOS2, OSM, PLG, POSTN, PTGDS, PTX3, S100A8, S100A9, SELL, SELP, SELPLG, SERPING1, Slpi (includes oth…	60		Hematological System Development and Function	binding	binding of leukocytes	9.91e-21	A2M, ADGRE5, ADIPOQ, ALOX15, AOC3, APOE, B4GALT1, C3, CACNA1C, CCL19, CCL2, CCL21, CCL4, CCL5, CCR3, CD14, CD2, CD209, CD22, CD3E, CD4, CD40, CD44, CD6, CD69, CD83, CD86, CHRNB2, CLEC10A, CLEC4M, Cmah, CNR2, CTLA4, CXCL10, CXCL11, CXCL13, CXCL2, CXCR1, CXCR3, CXCR4, DLL1, DOCK8, ELANE, FASLG, FCGR1A, FCGR2A, FCGR2B, FCGR3A/FCGR3B, FERMT3, FGF1, FGR, FUT4, FUT7, FYB, HCK, HGF, ICAM1, ICOS, IL10, I…	102		Cellular Movement	homing	homing	5.08e-33	ACKR2, ADAM17, ADORA1, AGT, AIF1, AKAP12, ANGPT1, ANXA1, AOC3, APLN, APLNR, APOE, BATF, BDNF, BIN2, BMP4, C3, C5AR1, C5AR2, CAPG, CCL17, CCL19, CCL2, Ccl2, CCL21, CCL22, CCL3L3, CCL4, CCL5, Ccl6, Ccl9, CCND1, CCR4, CCR6, CCR7, CCR9, CD28, CD4, CD44, CD69, CD9, CDKN1A, CKLF, CLCN3, CNR1, CNR2, COL4A3, CORO1A, CSF1R, CSF2RA, CSF3R, CST3, CTSE, CX3CR1, CXADR, CXCL10, CXCL11, CXCL14, CXCL16, CXCL2, C…	234		Cellular Function and Maintenance	function	function of macrophages	2.02e-31	AHR, ANPEP, APOE, ATM, BIRC3, CAPG, CARD9, CASP8, CCL2, Ccl2, CCL5, CCR6, CD14, CLCN3, CLEC4E, CLEC7A, CNR2, CSF1R, CXCL10, CYBB, DOK1, DOK2, FCER1G, FCGR1A, FCGR2A, FCGR2B, FES, FGR, FOS, GPR68, GRN, GSN, HCK, HSPB1, ICAM1, IL10, IL12B, IL18, IL1B, IL4R, IRF1, ITGAD, ITGAM, LCP1, LGALS3, LGMN, LY96, LYN, MMP12, MMP7, MSR1, MST1, Mt1, NCEH1, NLRP3, NOD2, NOS2, NPY1R, P2RY6, PCTP, PIK3CD, PLA2G15,…	87
Immune Cell Trafficking	accumulation	accumulation of antigen presenting cells	7.82e-13	ACKR3, AGT, AIMP1, APOE, C5AR1, Ccl2, CCL2, CCL21, CD40, CD44, CX3CR1, DDR1, DOCK8, ENTPD1, F2R, FAS, FGF1, FOSL1, GRN, HAVCR2, HMOX1, IFNAR1, IL1RN, IL33, INPP5D, IRF1, ITGA1, ITGAM, MMP3, MYD88, NR4A1, NT5E, PFN1, PLAU, PLG, PTX3, RUNX3, S100A9, STAT1, STAT3, THBS1, TIMP1, TLR4, TLR7, TNF, TNFAIP8L2, TNFRSF1B, TNFSF10, TYROBP	49		Hematological System Development and Function	binding	binding of phagocytes	6.83e-17	A2M, ADIPOQ, ALOX15, APOE, B4GALT1, C3, CACNA1C, CCL2, CCL5, CD14, CD2, CD209, CD4, CD40, CD69, CD83, CLEC10A, CLEC4M, Cmah, CNR2, CXCL10, CXCL2, CXCR1, CXCR4, DLL1, FASLG, FCGR1A, FCGR2A, FCGR3A/FCGR3B, FERMT3, FGF1, FGR, FUT4, FUT7, HCK, ICAM1, IL10, IL1A, ITGA4, ITGA6, ITGAL, ITGAM, ITGB2, KIT, LBP, LIPG, LSP1, LYN, MRC1, MSN, MSR1, PENK, PF4, PTPN6, PTPRC, S100A9, SELE, SELL, SELP, SELPLG, SF…	67		Cellular Movement	homing	homing of blood cells	3.68e-31	ACKR2, ADAM17, ADORA1, AIF1, ANGPT1, ANXA1, AOC3, APOE, BATF, BMP4, C3, C5AR1, C5AR2, CAPG, CCL17, CCL19, Ccl2, CCL2, CCL21, CCL22, CCL3L3, CCL4, CCL5, CCND1, CCR4, CCR6, CCR7, CCR9, CD28, CD4, CD44, CD69, CD9, CDKN1A, CKLF, CNR2, CORO1A, CSF1R, CSF2RA, CSF3R, CST3, CTSE, CX3CR1, CXADR, CXCL10, CXCL11, CXCL14, CXCL16, CXCL2, CXCL3, Cxcl3, CXCL6, Cxcl9, CXCR1, CXCR3, CXCR4, CYBB, CYSLTR1, EDNRA, E…	168		Cellular Function and Maintenance	function	function of B lymphocytes	1.06e-15	AHR, BACH2, BANK1, BCL2L11, BST1, BTK, BTLA, CCR7, CD40, CD72, Cmah, CNR2, CTSS, CXCL13, CXCR4, FCGR2A, GRK6, HCLS1, HLA-DQB1, ICOS, IL18, IL2RG, INPP5D, IRF4, JAK3, LAX1, LCP1, LYN, MS4A1, PIK3CD, PLCG2, PLCL2, PTPN6, PTPRC, RGS1, RHBDF2, SASH3, SH3BP2, SPPL2A, TBC1D10C, TLR3, TLR9, TNFAIP8L2, VAV1, VAV2, WAS	46
Immune Cell Trafficking	recruitment	recruitment of leukocytes	4.63e-22	ADAM17, ADIPOQ, AGT, AHR, ALOX5AP, ANXA1, AOC3, APOE, APP, ARRB2, ATG16L1, B4GALT1, C3, C4A/C4B, C5AR1, CAMP, CARD9, CASP1, Ccl2, CCL2, CCL20, CCL21, CCL22, CCL24, CCL3L3, CCL4, Ccl6, Ccl7, CCR3, CCR4, CCR6, CCR7, CD14, CD19, CD40, CD44, CD8A, CD93, CHI3L1, CLEC4E, CLEC7A, CMKLR1, CNR2, CSF1R, CSF2RB, CTSC, CX3CR1, CXCL10, CXCL11, CXCL16, CXCL2, CXCL3, CXCR2, CXCR3, CXCR4, CYP1A1, DPP4, F2RL1, FC…	161		Hematological System Development and Function	binding	binding of professional phagocytic cells	1.84e-16	A2M, ADIPOQ, ALOX15, APOE, B4GALT1, C3, CACNA1C, CCL2, CCL5, CD14, CD2, CD209, CD4, CD40, CD69, CD83, CLEC10A, CLEC4M, Cmah, CNR2, CXCL10, CXCL2, CXCR1, CXCR4, DLL1, FASLG, FCGR1A, FCGR2A, FCGR3A/FCGR3B, FERMT3, FGF1, FGR, FUT4, FUT7, HCK, ICAM1, IL10, IL1A, ITGA4, ITGA6, ITGAL, ITGAM, ITGB2, KIT, LBP, LIPG, LSP1, LYN, MRC1, MSN, MSR1, PENK, PF4, PTPN6, PTPRC, S100A9, SELE, SELL, SELP, SELPLG, SF…	66		Cellular Movement	homing	homing of leukocytes	1.76e-30	ACKR2, ADAM17, ADORA1, AIF1, ANGPT1, ANXA1, AOC3, APOE, BATF, C3, C5AR1, C5AR2, CAPG, CCL17, CCL19, Ccl2, CCL2, CCL21, CCL22, CCL3L3, CCL4, CCL5, CCND1, CCR4, CCR6, CCR7, CCR9, CD28, CD4, CD44, CD69, CD9, CDKN1A, CKLF, CNR2, CORO1A, CSF1R, CSF2RA, CSF3R, CST3, CTSE, CX3CR1, CXADR, CXCL10, CXCL11, CXCL14, CXCL16, CXCL2, CXCL3, Cxcl3, CXCL6, Cxcl9, CXCR1, CXCR3, CXCR4, CYBB, CYSLTR1, EDNRA, EDNRB, …	166		Cellular Function and Maintenance	function	function of dendritic cells	6.41e-15	ADA, AHR, APOE, BATF3, BTK, CAPG, CARD9, Ccl2, CCR7, CD200R1, CD274, CD40, CLEC7A, CSF1R, CTSZ, DOCK8, HGF, IFIH1, IL10, IL21R, IL2RG, JAK3, LGALS3, LPAR2, LTB, LYN, MAP4K1, MMP9, NLRP10, PLA2G2D, PLCG2, RASSF5, RGS1, SAMSN1, SELL, SIRPA, SLA, SUCNR1, TLR2, TLR3, TLR9, TNF, TYROBP, WAS	44
Immune Cell Trafficking	recruitment	recruitment of myeloid cells	1e-19	ADAM17, AGT, AHR, ALOX5AP, ANXA1, AOC3, APOE, APP, ARRB2, ATG16L1, B4GALT1, C3, C5AR1, CAMP, CARD9, CASP1, Ccl2, CCL2, CCL20, CCL22, CCL24, CCL3L3, CCL4, Ccl7, CCR3, CCR6, CD14, CD19, CD44, CD8A, CHI3L1, CLEC4E, CNR2, CSF1R, CSF2RB, CTSC, CX3CR1, CXCL10, CXCL2, CXCL3, CXCR2, CYP1A1, DPP4, F2RL1, FCER2, FCGR2A, FCGR2B, FCGR3A/FCGR3B, FUT7, GLRX, GRK6, GSN, ICAM1, IFNAR1, IL10, IL17RA, IL18, IL1A, …	116		Hematological System Development and Function	binding	binding of mononuclear leukocytes	1.69e-14	ALOX15, AOC3, B4GALT1, CCL19, CCL2, CCL21, CCL4, CCL5, CCR3, CD2, CD22, CD3E, CD4, CD40, CD44, CD6, CD69, CD86, CLEC10A, Cmah, CTLA4, CXCL10, CXCL11, CXCL13, CXCR3, CXCR4, DOCK8, FASLG, FCGR3A/FCGR3B, FGF1, FUT7, FYB, HGF, ICAM1, ICOS, IL10, IL18R1, IL1A, ITGA4, ITGAL, ITGAM, ITGB2, ITGB7, ITK, LBP, LCK, LCP2, LFNG, LIPG, MSN, NT5E, PENK, RAP1GAP, SELE, SELL, SELPLG, SH2D1A, TGFB1, TNC, TNF, TNFS…	63		Cellular Movement	homing	homing of neutrophils	5.98e-19	ADORA1, C3, C5AR1, C5AR2, CAPG, CCL19, Ccl2, CCL2, CCL21, CCL3L3, CCL4, CCL5, CCR6, CCR7, CD28, CD69, CKLF, CORO1A, CSF2RA, CSF3R, CST3, CXADR, CXCL10, CXCL14, CXCL2, CXCL3, Cxcl3, CXCL6, CXCR1, EDNRA, FASLG, FCER1G, FCGR2A, FGR, GRK6, GRN, GSN, HCK, ICAM1, IL18, IL1B, IL1R1, INPP5D, ITGA4, ITGAM, ITGB2, LCN2, LGALS3, LSP1, LYN, MDK, MYO1F, NCKAP1L, NOD2, PDE4B, PF4, PIK3CD, PIK3R5, PREX1, PRKCA,…	78		Cellular Function and Maintenance	function	function of granulocytes	9.53e-15	ADIPOQ, B4GALT1, BCL2A1, Ccl2, CD14, CEBPE, CLCN3, CLEC7A, CXCL10, CYBB, FCGR2A, FCMR, FGR, FUT7, HCK, HLA-G, HSPB1, IL10, IL12B, IL1B, IL1R1, IL2RG, ITGAL, ITGAM, ITGB2, LCP1, LYN, MMP9, NCF1, NOS1, PIK3CD, PLAC8, PLAUR, PLCB2, RAC2, RASGRP4, SELE, SELP, SERPINB1, SIGLEC8, SLAMF6, STX11, SYK, TNF	44
Immune Cell Trafficking	recruitment	recruitment of granulocytes	4.04e-18	ADAM17, AGT, AHR, ALOX5AP, ANXA1, APOE, ARRB2, ATG16L1, B4GALT1, C3, C5AR1, CAMP, CARD9, CASP1, Ccl2, CCL2, CCL20, CCL22, CCL24, CCL3L3, CCL4, Ccl7, CCR3, CCR6, CD14, CD19, CD44, CD8A, CHI3L1, CLEC4E, CSF2RB, CTSC, CX3CR1, CXCL10, CXCL2, CXCL3, CXCR2, CYP1A1, DPP4, F2RL1, FCER2, FCGR2A, FCGR2B, FCGR3A/FCGR3B, FUT7, GLRX, GRK6, GSN, ICAM1, IFNAR1, IL10, IL17RA, IL18, IL1A, IL1B, IL1R1, IL1RL1, IL1…	109		Hematological System Development and Function	binding	binding of lymphocytes	6.39e-13	AOC3, CCL19, CCL21, CCL4, CCL5, CCR3, CD2, CD22, CD3E, CD40, CD44, CD6, CD69, CD86, CLEC10A, Cmah, CTLA4, CXCL10, CXCL11, CXCL13, CXCR3, CXCR4, DOCK8, FASLG, FCGR3A/FCGR3B, FUT7, FYB, HGF, ICAM1, ICOS, IL10, IL18R1, ITGA4, ITGAL, ITGB2, ITGB7, ITK, LCK, LCP2, LFNG, MSN, NT5E, RAP1GAP, SELL, SELPLG, SH2D1A, TGFB1, TNC, TNF, TNFSF11, TNFSF14, TXK	52		Cellular Movement	homing	homing of granulocytes	1.05e-17	ADORA1, ANXA1, C3, C5AR1, C5AR2, CAPG, CCL19, Ccl2, CCL2, CCL21, CCL3L3, CCL4, CCL5, CCR6, CCR7, CD28, CD69, CKLF, CORO1A, CSF2RA, CSF3R, CST3, CXADR, CXCL10, CXCL14, CXCL2, CXCL3, Cxcl3, CXCL6, Cxcl9, CXCR1, CXCR3, EDNRA, FASLG, FCER1G, FCGR2A, FGR, GRK6, GRN, GSN, HCK, ICAM1, IL18, IL1B, IL1R1, INPP5D, ITGA4, ITGAM, ITGB2, LCN2, LGALS3, LSP1, LYN, MDK, MYO1F, NCKAP1L, NOD2, PDE4B, PF4, PIK3CD, …	85		Cellular Function and Maintenance	function	function of neutrophils	1.29e-13	B4GALT1, BCL2A1, Ccl2, CD14, CEBPE, CLCN3, CLEC7A, CYBB, FCGR2A, FGR, FUT7, HCK, HLA-G, HSPB1, IL1B, IL1R1, ITGAL, ITGAM, ITGB2, LCP1, LYN, MMP9, NCF1, NOS1, PIK3CD, PLAC8, PLAUR, PLCB2, RAC2, RASGRP4, SELE, SELP, SERPINB1, SLAMF6, STX11, SYK, TNF	37
Immune Cell Trafficking	recruitment	recruitment of phagocytes	4.04e-16	ADAM17, ADIPOQ, AGT, AHR, ALOX5AP, ANXA1, APOE, APP, ARRB2, ATG16L1, B4GALT1, C5AR1, CAMP, CASP1, Ccl2, CCL2, CCL20, CCL22, CCL3L3, CCL4, Ccl7, CD14, CD19, CD40, CD44, CD8A, CHI3L1, CLEC4E, CMKLR1, CSF1R, CTSC, CX3CR1, CXCL10, CXCL2, CXCL3, CXCR2, CYP1A1, F2RL1, FCER2, FCGR2A, FCGR2B, FCGR3A/FCGR3B, FUT7, FUT8, GLRX, GPC3, GRK6, GSN, HCAR2, ICAM1, IFNAR1, IL10, IL17RA, IL18, IL1A, IL1B, IL1R1, IL…	117		Hematological System Development and Function	expansion	expansion of leukocytes	1.82e-18	ABCB1, AHR, B2M, BCL3, BTK, C3, C5AR1, CASP8, CCR6, CCR7, CD180, CD2, CD209, CD244, Cd24a, CD27, CD28, CD3E, CD4, CD40, CD55, CD69, CD80, CD86, CDKN1B, CDKN2C, CEBPA, CR2, CSF1R, CTLA4, CTSD, CXCR3, DEF6, DOK1, ELANE, FCGR2B, FLT3, GRAP2, HAVCR2, HMOX1, ICOS, IFNAR1, IL10, IL10RA, IL18, IL1B, IL21, IL21R, IL4R, IL6, IL7R, IRF1, ITK, JAK3, KLF2, Klrk1, LAG3, LCP1, LCP2, LEP, LEPR, LY9, LYN, MET, M…	106		Cellular Movement	homing	homing of mononuclear leukocytes	8.29e-15	ACKR2, ADAM17, AIF1, ANGPT1, ANXA1, AOC3, BATF, CCL17, CCL19, Ccl2, CCL2, CCL21, CCL22, CCL4, CCL5, CCR4, CCR6, CCR7, CCR9, CD44, CKLF, CNR2, CXCL10, CXCL11, CXCL16, CXCL3, Cxcl9, CXCR1, CXCR3, CXCR4, CYSLTR1, ELN, F2R, FN1, FOXO1, FUT7, FYB, GNAO1, GNAZ, GNRH1, HLA-G, HP, IL16, IL1B, INHBA, ITGA4, ITGAE, ITGAL, ITGB7, ITK, JAK2, JAK3, LAT, LCP1, LGALS3, MMP9, MST1, MYLK, OPRD1, PF4, PIK3CD, PLA2…	83		Cellular Function and Maintenance	homeostasis	cellular homeostasis	9.27e-53	A4GALT, ABCA1, ABCC3, ABCG1, ACAP1, ADA, ADAM17, ADIPOQ, AGT, Agtr1b, AHR, AKR1B1, ALAS2, ALB, ALOX15, ANGPT1, ANXA1, APLN, APOE, ARNTL, ARSB, ASIC2, ATG4C, ATM, ATP1A2, ATP1A3, ATP1B1, ATP1B2, ATP2B2, ATP6V1B2, ATP7B, AVPR1B, BATF, BBC3, BCL11B, BCL2A1, BCL2L11, BCO2, BID, BIRC2, BIRC5, BMF, BMP6, BNIP3, BTK, BVES, C1QTNF3, C3, C4A/C4B, C5AR1, CACNA1C, CACNA1E, CACNB3, CADM1, CALB1, CAMK1, CASP1…	454
Immune Cell Trafficking	recruitment	recruitment of neutrophils	1.42e-15	ADAM17, AGT, AHR, ALOX5AP, ANXA1, APOE, ARRB2, ATG16L1, B4GALT1, C5AR1, CAMP, CASP1, Ccl2, CCL2, CCL20, CCL22, CCL3L3, CCL4, Ccl7, CD14, CD19, CD44, CD8A, CHI3L1, CLEC4E, CTSC, CX3CR1, CXCL10, CXCL2, CXCL3, CXCR2, CYP1A1, F2RL1, FCGR2A, FCGR2B, FCGR3A/FCGR3B, FUT7, GLRX, GRK6, GSN, ICAM1, IFNAR1, IL10, IL17RA, IL18, IL1A, IL1B, IL1R1, IL1RN, IL33, IL6, IL6R, ITGAM, ITGB2, LEP, LGALS3, LIF, LSP1, …	92		Hematological System Development and Function	expansion	expansion of T lymphocytes	2.06e-18	AHR, B2M, C3, C5AR1, CASP8, CCR6, CCR7, CD2, CD209, CD244, Cd24a, CD27, CD28, CD3E, CD4, CD40, CD55, CD69, CD80, CD86, CDKN1B, CTLA4, CTSD, CXCR3, DEF6, DOK1, GRAP2, HAVCR2, ICOS, IFNAR1, IL10, IL18, IL1B, IL21, IL21R, IL4R, IL6, IL7R, IRF1, ITK, JAK3, KLF2, Klrk1, LAG3, LCP1, LCP2, LEP, LEPR, LY9, MYD88, NOS1, PARP1, PCGF2, PDCD1, PIK3CB, PIK3CD, PIM1, PLP1, PPARG, PRF1, SERPINB9, SHH, SLAMF1, S…	84		Cellular Movement	infiltration	infiltration	3.83e-32	ABCB4, ADA, ADAM17, ADIPOQ, AGT, AKR1B1, ANXA1, APOE, ARG1, BCL11B, BID, C2, C3, C6, CASP1, CAV3, CBFB, CCL19, Ccl2, CCL2, CCL21, CCL22, CCL3L3, CCL4, CCL5, CCR6, CCR7, CD14, CD2, CD40, CD44, CD80, CD86, CES1, CFH, CFTR, CIITA, CLEC5A, CMA1, CNR1, CNR2, COL2A1, COL4A3, CRYAB, CSF1R, CTSB, CXCL10, CXCL16, CXCL2, CXCL3, CYBB, CYSLTR1, EGLN3, ESR1, ESR2, F2R, F2RL1, FASLG, FCER1G, FCGR2B, FGL2, FN1,…	182		Cellular Function and Maintenance	homeostasis	Lymphocyte homeostasis	6.53e-33	ABCG1, ADA, ADAM17, AHR, ANXA1, ATM, BATF, BBC3, BCL11B, BCL2A1, BCL2L11, BIRC5, BMF, C5AR1, CADM1, CASP1, CASP8, CBFB, CCL19, CCR7, CCR9, CD1D, CD2, CD226, CD244, CD247, CD274, CD28, CD3D, CD3E, CD3G, CD4, CD5, CD6, CD69, CD74, CD80, CD83, CD86, CD8A, CD8B, CDKN2A, CISH, CNR2, CORO1A, CXCR4, DCLRE1C, DKK1, DNASE2, DNTT, DOK1, DOK2, EGR2, EPHA4, FCER1G, FCGR2A, FCGR2B, GAPT, HAVCR2, HGF, HLA-DOA,…	190
Immune Cell Trafficking	cell rolling	cell rolling of leukocytes	3.91e-12	ADAM17, ANXA1, AOC3, BTK, CCL2, CCR7, CD14, CD44, CD63, CHST1, CHST4, CXCL2, CXCL3, CXCR2, F2RL1, FAS, FCGR2A, FCGR3A/FCGR3B, FGR, FUT4, FUT7, FYB, HCK, ICAM1, IL1B, ITGA4, ITGAL, ITGAM, ITGB2, ITGB7, LCP2, LGALS3, LYN, NOS3, PRDX1, PREX1, PRKCQ, RAC2, SELE, SELL, SELP, SELPLG, SPN, TLR4, TNF	45		Hematological System Development and Function	expansion	expansion of lymphocytes	2.67e-17	AHR, B2M, BCL3, BTK, C3, C5AR1, CASP8, CCR6, CCR7, CD180, CD2, CD209, CD244, Cd24a, CD27, CD28, CD3E, CD4, CD40, CD55, CD69, CD80, CD86, CDKN1B, CDKN2C, CR2, CTLA4, CTSD, CXCR3, DEF6, DOK1, FCGR2B, GRAP2, HAVCR2, ICOS, IFNAR1, IL10, IL18, IL1B, IL21, IL21R, IL4R, IL6, IL7R, IRF1, ITK, JAK3, KLF2, Klrk1, LAG3, LCP1, LCP2, LEP, LEPR, LY9, MYBL1, MYD88, NOS1, PARP1, PCGF2, PDCD1, PIK3CB, PIK3CD, PIM…	93		Cellular Movement	infiltration	infiltration of cells	8.15e-31	ABCB4, ADA, ADAM17, ADIPOQ, AGT, AKR1B1, ANXA1, APOE, ARG1, BCL11B, BID, C2, C3, C6, CASP1, CAV3, CBFB, CCL19, Ccl2, CCL2, CCL21, CCL22, CCL3L3, CCL4, CCL5, CCR6, CCR7, CD14, CD2, CD40, CD44, CD80, CD86, CES1, CFH, CFTR, CIITA, CLEC5A, CMA1, CNR1, CNR2, COL2A1, COL4A3, CRYAB, CSF1R, CTSB, CXCL10, CXCL16, CXCL2, CXCL3, CYBB, CYSLTR1, EGLN3, ESR1, ESR2, F2R, F2RL1, FASLG, FCER1G, FCGR2B, FGL2, FN1,…	178		Cellular Function and Maintenance	homeostasis	homeostasis of leukocytes	9.78e-33	ABCG1, ADA, ADAM17, AHR, ANXA1, ATM, BATF, BBC3, BCL11B, BCL2A1, BCL2L11, BIRC5, BMF, C5AR1, CADM1, CASP1, CASP8, CBFB, CCL19, CCR7, CCR9, CD1D, CD2, CD226, CD244, CD247, CD274, CD28, CD3D, CD3E, CD3G, CD4, CD5, CD6, CD69, CD74, CD80, CD83, CD86, CD8A, CD8B, CDKN2A, CISH, CNR2, CORO1A, CXCR4, DCLRE1C, DKK1, DNASE2, DNTT, DOK1, DOK2, EGR2, EPHA4, FCER1G, FCGR2A, FCGR2B, FLT3, GAPT, HAVCR2, HGF, HL…	192
Tissue Morphology	quantity	quantity of cells	1.33e-57	ABCA1, ABCB1, Abcb1b, ACKR3, ACVR1C, ADA, ADAM17, ADAMTS1, ADAMTS12, ADIPOQ, ADRA1B, ADRB1, AGT, AHR, AICDA, AIFM1, ALCAM, AMH, ANK3, ANPEP, ANXA1, ANXA7, AOC3, APAF1, APOE, APP, AQP1, AR, ARF6, ARHGDIA, ARHGDIB, ARID3A, ARID5A, ARNTL, ARNTL2, ATG7, ATM, B3GNT5, B4GALT1, BANK1, BATF, BATF3, BAX, BCL11A, BCL2A1, BCL2L11, BCL3, BCLAF1, BGN, BID, BIRC3, BIRC5, BLNK, BMP2, BMP4, BMP6, BRCA1, BRCA2, B…	784		Hematological System Development and Function	expansion	expansion of mononuclear leukocytes	8.95e-17	AHR, B2M, BCL3, BTK, C3, C5AR1, CASP8, CCR6, CCR7, CD180, CD2, CD209, CD244, Cd24a, CD27, CD28, CD3E, CD4, CD40, CD55, CD69, CD80, CD86, CDKN1B, CDKN2C, CR2, CSF1R, CTLA4, CTSD, CXCR3, DEF6, DOK1, FCGR2B, GRAP2, HAVCR2, ICOS, IFNAR1, IL10, IL10RA, IL18, IL1B, IL21, IL21R, IL4R, IL6, IL7R, IRF1, ITK, JAK3, KLF2, Klrk1, LAG3, LCP1, LCP2, LEP, LEPR, LY9, MYBL1, MYD88, NOS1, PARP1, PCGF2, PDCD1, PIK3…	95		Cellular Movement	infiltration	infiltration of blood cells	1.23e-29	ABCB4, ADA, ADAM17, ADIPOQ, AGT, AKR1B1, ANXA1, APOE, ARG1, BCL11B, BID, C2, C3, C6, CASP1, CBFB, CCL19, Ccl2, CCL2, CCL21, CCL22, CCL3L3, CCL4, CCL5, CCR6, CCR7, CD14, CD2, CD44, CD80, CD86, CES1, CFH, CFTR, CIITA, CLEC5A, CMA1, CNR1, CNR2, COL4A3, CRYAB, CSF1R, CTSB, CXCL10, CXCL16, CXCL2, CXCL3, CYBB, CYSLTR1, EGLN3, ESR1, ESR2, F2R, F2RL1, FASLG, FCER1G, FCGR2B, FN1, FUT4, FUT7, GFAP, GJB2, H…	169		Cellular Function and Maintenance	homeostasis	T cell homeostasis	1.89e-31	ADA, ADAM17, AHR, ANXA1, ATM, BATF, BBC3, BCL11B, BCL2A1, BCL2L11, BIRC5, BMF, C5AR1, CADM1, CASP1, CASP8, CBFB, CCL19, CCR7, CCR9, CD1D, CD2, CD226, CD244, CD247, CD274, CD28, CD3D, CD3E, CD3G, CD4, CD5, CD6, CD69, CD74, CD80, CD83, CD86, CD8A, CD8B, CDKN2A, CISH, CNR2, CORO1A, CXCR4, DCLRE1C, DKK1, DNASE2, DNTT, DOK1, DOK2, EGR2, EPHA4, FCER1G, FCGR2A, FCGR2B, HAVCR2, HLA-DOA, HLA-DQA1, HLA-DQB…	180
Tissue Morphology	quantity	quantity of blood cells	2.81e-57	ABCA1, ABCB1, Abcb1b, ACKR3, ADA, ADAM17, ADAMTS12, ADIPOQ, AGT, AHR, AICDA, ANPEP, ANXA7, APOE, APP, AQP1, ARHGDIA, ARHGDIB, ARID3A, ARID5A, ARNTL, ATG7, ATM, B3GNT5, B4GALT1, BANK1, BATF, BATF3, BAX, BCL11A, BCL2A1, BCL2L11, BCL3, BCLAF1, BID, BIRC3, BIRC5, BLNK, BMP4, BRCA2, BST1, Bst2, BTK, BUB1, C3, C4A/C4B, C5AR1, C5AR2, CAMP, CASP3, CASP8, CBFB, Ccl2, CCL2, CCL20, CCL21, CCL22, CCL24, CCL3…	537		Hematological System Development and Function	morphology	morphology of T lymphocytes	3.59e-18	ABCB1, Abcb1b, B2M, BAX, BCL11A, BCL11B, CCDC86, CCR6, CCR9, CD247, CD28, CD3E, CD4, CD5, CD5L, CD8A, CD8B, CDKN1A, CTLA4, CXCL11, CYTIP, DCK, E2F1, EBI3, FASLG, FCER1G, FCGR2B, GRAP2, HLA-A, HLA-G, IL18, IL1RN, IL21, IL2RB, IL2RG, IL6, IL7R, INPP5D, IRF1, ITK, ITPKB, JAK3, LAT, LCK, LCP2, LGALS3, LY9, LYST, MPZ, NFKBIZ, PRKCH, PRKCQ, PSMB10, PSMB9, PTPN22, PTPRC, RASGRP1, RCAN2, RHOH, RUNX3, SAS…	74		Cellular Movement	infiltration	infiltration of leukocytes	3.03e-29	ABCB4, ADA, ADAM17, ADIPOQ, AGT, ANXA1, APOE, ARG1, BCL11B, BID, C2, C3, C6, CASP1, CBFB, CCL19, Ccl2, CCL2, CCL21, CCL22, CCL3L3, CCL4, CCL5, CCR6, CCR7, CD14, CD2, CD44, CD80, CD86, CES1, CFH, CFTR, CIITA, CLEC5A, CMA1, CNR1, CNR2, COL4A3, CRYAB, CSF1R, CTSB, CXCL10, CXCL16, CXCL2, CXCL3, CYBB, CYSLTR1, EGLN3, ESR1, ESR2, F2R, F2RL1, FASLG, FCER1G, FCGR2B, FN1, FUT4, FUT7, GFAP, GJB2, HCK, HGF,…	168		Cellular Function and Maintenance	development	T cell development	1.71e-30	ADA, ADAM17, AHR, ANXA1, ATM, BATF, BBC3, BCL11B, BCL2A1, BCL2L11, BIRC5, C5AR1, CADM1, CASP1, CBFB, CCR7, CCR9, CD1D, CD2, CD226, CD244, CD247, CD274, CD28, CD3D, CD3E, CD3G, CD4, CD5, CD6, CD69, CD74, CD80, CD83, CD86, CD8A, CD8B, CDKN2A, CISH, CNR2, CXCR4, DCLRE1C, DKK1, DNASE2, DNTT, DOK1, DOK2, EGR2, EPHA4, FCER1G, FCGR2A, FCGR2B, HAVCR2, HLA-DOA, HLA-DQA1, HLA-DQB1, HLA-G, HMGA1, ICAM1, ICO…	175
Tissue Morphology	quantity	quantity of leukocytes	9.5e-56	ABCA1, ABCB1, Abcb1b, ACKR3, ADA, ADAM17, ADAMTS12, ADIPOQ, AGT, AHR, AICDA, ANPEP, APOE, APP, ARHGDIA, ARHGDIB, ARID3A, ARID5A, ARNTL, ATM, B3GNT5, B4GALT1, BANK1, BATF, BATF3, BAX, BCL11A, BCL2A1, BCL2L11, BCL3, BCLAF1, BID, BIRC3, BIRC5, BLNK, BRCA2, BST1, Bst2, BTK, BUB1, C3, C4A/C4B, C5AR1, C5AR2, CAMP, CASP3, CASP8, CBFB, Ccl2, CCL2, CCL20, CCL21, CCL22, CCL24, CCL3L3, CCL4, Ccl7, Ccl9, CCN…	484		Hematological System Development and Function	engulfment	engulfment of myeloid cells	4.1e-16	ABCA1, ALOX15, ANXA1, ATG7, C3, CAPG, CD14, CD38, CD44, CLCN3, CLEC4M, CORO1A, CSF2RB, CXCL10, CYP2S1, DEF6, FCER1G, FCGR1A, FCGR2A, FCGR2B, FCGR3A/FCGR3B, FCMR, FCN1, FGR, GLRX, Gm21596/Hmgb1, GSN, HCK, HGF, HMOX1, IFNAR1, IL1A, IL1B, IL21, INPP5D, IRF8, ISG15, ITGAM, ITGB2, LCN2, LGALS3, MRC1, MSR1, MYD88, NOD2, NPM1, PF4, PLA2G5, PLAU, PLAUR, PTPRC, RAPGEF3, RORA, S100A9, SELPLG, SERPINE1, SFT…	74		Cellular Movement	infiltration	infiltration of granulocytes	7.93e-22	ADAM17, ADIPOQ, AGT, ANXA1, APOE, C2, C3, CASP1, CBFB, CCL19, CCL21, CCL4, CCL5, CCR7, CD14, CD2, CD44, CFH, CFTR, CMA1, CRYAB, CTSB, CXCL10, CXCL2, CXCL3, F2R, F2RL1, FASLG, FCER1G, FUT4, FUT7, GJB2, HCK, HGF, HMOX1, HSPB1, ICAM1, IL17RA, IL18, IL1A, IL1B, IL1R1, IL1RL1, IL1RN, IL2RB, IL4R, IL6, IRF6, ITGAL, ITGAM, ITGB2, ITK, JAK3, LCN2, LTC4S, MDK, MMP12, MMP8, MMP9, MSR1, MYLK, NCF1, NOS2, NT…	97		Cellular Function and Maintenance	ion homeostasis	ion homeostasis of cells	1.88e-25	A4GALT, ABCC3, ADA, ADIPOQ, AGT, Agtr1b, AKR1B1, ALAS2, ALB, ANXA1, APOE, ATP1A2, ATP1A3, ATP1B1, ATP1B2, ATP2B2, ATP6V1B2, ATP7B, AVPR1B, BMP6, BTK, C3, C4A/C4B, C5AR1, CACNA1C, CACNB3, CALB1, CASP1, CAV3, CCL17, CCL19, CCL2, Ccl2, CCL21, CCL22, CCL3L3, CCL4, CCL5, Ccr2, CCR6, CCR7, CCR9, CD101, CD2, CD244, CD247, CD28, CD300A, CD3E, CD4, CD40, CD5, CD7, CD72, CD8A, CHGA, CKB, CLCN3, CLDN14, CLD…	176
Tissue Morphology	quantity	quantity of lymphocytes	8.27e-42	ABCB1, Abcb1b, ACKR3, ADA, ADIPOQ, AGT, AHR, AICDA, ANPEP, APOE, APP, ARHGDIA, ARHGDIB, ARID3A, ARID5A, ARNTL, ATM, B3GNT5, B4GALT1, BANK1, BATF, BATF3, BAX, BCL11A, BCL2A1, BCL2L11, BCL3, BCLAF1, BID, BIRC5, BLNK, BST1, Bst2, BTK, C3, C5AR1, CAMP, CASP3, CASP8, CBFB, CCL2, Ccl2, CCL21, CCL4, CCNB2, CCR4, CCR6, CCR7, CCR9, CD180, CD19, CD1D, CD22, CD244, CD247, Cd24a, CD27, CD274, CD38, CD3G, CD4…	366		Hematological System Development and Function	phagocytosis	phagocytosis of myeloid cells	9.06e-16	ABCA1, ALOX15, ANXA1, ATG7, C3, CAPG, CD14, CD38, CD44, CLCN3, CLEC4M, CORO1A, CSF2RB, CXCL10, CYP2S1, DEF6, FCER1G, FCGR1A, FCGR2A, FCGR2B, FCGR3A/FCGR3B, FCMR, FCN1, FGR, GLRX, Gm21596/Hmgb1, GSN, HCK, HGF, HMOX1, IFNAR1, IL1B, IL21, INPP5D, IRF8, ISG15, ITGAM, ITGB2, LCN2, LGALS3, MYD88, NOD2, NPM1, PF4, PLA2G5, PLAU, PLAUR, PTPRC, RAPGEF3, RORA, S100A9, SELPLG, SERPINE1, SFTPA1, SIGLEC1, SIRP…	71		Cellular Movement	infiltration	infiltration by neutrophils	2.41e-17	ADAM17, ADIPOQ, AGT, ANXA1, APOE, C2, C3, CASP1, CCL21, CCL4, CD14, CD44, CFH, CFTR, CTSB, CXCL10, CXCL2, CXCL3, F2RL1, FASLG, FCER1G, FUT4, FUT7, GJB2, HGF, HMOX1, HSPB1, ICAM1, IL17RA, IL18, IL1A, IL1B, IL1R1, IL1RN, IL6, IRF6, ITGAL, ITGAM, ITGB2, JAK3, LCN2, MDK, MMP12, MMP8, MMP9, NCF1, NOS2, NT5E, PF4, PLAT, PLCB2, PLTP, PRDM1, PRKCA, PTGER3, RAB27A, RAC2, REN, RSPO3, SELE, SELL, SELP, SOCS…	73		Cellular Function and Maintenance	phagocytosis	phagocytosis	3.4e-25	ABCA1, ADIPOQ, ADORA1, ALOX15, ANXA1, C1QA, C3, CAMK1D, CAPG, Ccl2, CD14, CD4, CD44, CEBPE, CERK, CH25H, CKB, CLCN3, CLEC4M, CLEC7A, COLEC12, CORO1A, CSF3R, CXCL10, CYP2S1, EIF2AK2, F10, F2RL1, FCER1G, FCGR1A, FCGR2A, FCGR2B, FCGR3A/FCGR3B, FCMR, FCN1, FGR, GLRX, GSN, Havcr1, HCK, HGF, HMOX1, ICAM1, ICOS, IL10, IL1B, INPP5D, IRF7, IRF8, ISG15, ITGAM, ITGB2, LAT, LCN2, LEP, LGALS3, LYN, MCOLN3, MR…	109
Tissue Morphology	quantity	quantity of mononuclear leukocytes	1.41e-41	ABCB1, Abcb1b, ACKR3, ADA, ADIPOQ, AGT, AHR, AICDA, ANPEP, APOE, APP, ARHGDIA, ARHGDIB, ARID3A, ARID5A, ARNTL, ATM, B3GNT5, B4GALT1, BANK1, BATF, BATF3, BAX, BCL11A, BCL2A1, BCL2L11, BCL3, BCLAF1, BID, BIRC5, BLNK, BST1, Bst2, BTK, C3, C5AR1, CAMP, CASP3, CASP8, CBFB, CCL2, Ccl2, CCL21, CCL4, Ccl7, CCNB2, CCR3, CCR4, CCR6, CCR7, CCR9, CD180, CD19, CD1D, CD22, CD244, CD247, Cd24a, CD27, CD274, CD3…	377		Hematological System Development and Function	interaction	interaction of leukocytes	1.66e-14	CCL21, CCL4, CCL5, CCR3, CCR7, CD14, CD2, CD209, CD22, CD28, CD4, CD40, CD44, CD6, CD69, CD80, CD86, CLEC10A, CLEC4M, Cmah, CTLA4, CXCL10, CXCL11, CXCR3, CXCR4, EZR, FASLG, FUT7, FYB, ICAM1, ICOS, IL10, IL17RA, IL18R1, ITGA4, ITGAL, ITGB2, ITK, LCK, LCP2, LFNG, LIF, MSN, NRP1, PLCB1, RGS16, RHBDD3, SELP, SELPLG, SKAP1, SPN, TGFB1, TLR2, TNC, TNFRSF8, TNFSF11, TNFSF14, TXK	58		Cellular Movement	infiltration	infiltration by mononuclear leukocytes	1.2e-15	AGT, APOE, BCL11B, C3, C6, CBFB, CCL19, Ccl2, CCL2, CCL21, CCL22, CCL3L3, CCL4, CCR7, CD44, CD80, CD86, CIITA, COL4A3, CXCL10, CXCL16, ESR1, ESR2, F2RL1, FASLG, FN1, GJB2, HCK, HLA-A, HMOX1, ICOS, IL16, IL17C, IL17RA, IL18, IL18BP, IL1B, IL6, IRF6, ITGA4, ITK, JAK3, KCNK2, LAG3, LTB, MIF, MMP12, MMP9, MYLK, NFKBIZ, NLRP3, OSM, PDCD1, PF4, PIK3CD, PIK3R1, PRF1, PRKCQ, REN, RETN, SELE, SELP, SELPLG…	75		Cellular Function and Maintenance	phagocytosis	phagocytosis of cells	1.49e-24	ABCA1, ADIPOQ, ADORA1, ALOX15, ANXA1, C1QA, C3, CAMK1D, CAPG, CD14, CD4, CD44, CEBPE, CERK, CH25H, CKB, CLCN3, CLEC4M, CLEC7A, COLEC12, CORO1A, CSF3R, CXCL10, CYP2S1, F10, F2RL1, FCER1G, FCGR1A, FCGR2A, FCGR2B, FCGR3A/FCGR3B, FCMR, FCN1, FGR, GLRX, GSN, HCK, HGF, HMOX1, ICAM1, ICOS, IL10, IL1B, INPP5D, IRF7, IRF8, ISG15, ITGAM, ITGB2, LAT, LCN2, LEP, LGALS3, LYN, MSR1, MYO7A, NOD2, NPY, PF4, PIK3…	101
Tissue Morphology	quantity	quantity of myeloid cells	3.87e-37	ADA, ADAM17, ADAMTS12, ADIPOQ, AHR, APOE, APP, ARHGDIA, ARHGDIB, ARID3A, ARNTL, B4GALT1, BCL2L11, BID, BRCA2, C3, C4A/C4B, C5AR1, C5AR2, CAMP, CASP8, CCL2, Ccl2, CCL22, CCL24, CCL3L3, CCR3, CCR4, CCR6, CD101, CD19, CD1D, CD200R1, CD22, Cd24a, CD300A, CD34, CD40, CD8A, CD97, CDKN1A, CDKN1B, CEBPE, CERK, CFH, CLEC11A, CLEC4E, CLEC7A, CMKLR1, CNR2, CSF1R, CSF2RB, CSF3R, CTSE, CXCL6, CXCR2, CXCR4, CY…	205		Hematological System Development and Function	interaction	interaction of mononuclear leukocytes	2.53e-14	CCL21, CCL4, CCL5, CCR3, CCR7, CD14, CD2, CD209, CD22, CD28, CD4, CD40, CD44, CD6, CD69, CD80, CD86, CLEC10A, CLEC4M, Cmah, CTLA4, CXCL10, CXCL11, CXCR3, CXCR4, EZR, FASLG, FUT7, FYB, ICAM1, ICOS, IL10, IL17RA, IL18R1, ITGA4, ITGAL, ITGB2, ITK, LCK, LCP2, LFNG, LIF, MSN, NRP1, PLCB1, RGS16, RHBDD3, SELPLG, SKAP1, SPN, TGFB1, TLR2, TNC, TNFRSF8, TNFSF11, TNFSF14, TXK	57		Cellular Movement	infiltration	infiltration of phagocytes	5.59e-13	ADAM17, ADIPOQ, AGT, ANXA1, APOE, ARG1, BID, C3, C6, CASP1, Ccl2, CCL2, CCL4, CCR6, CD44, CES1, CFTR, CNR1, CNR2, COL4A3, CSF1R, CXCL10, CYBB, EGLN3, HGF, HMOX1, ICAM1, IL16, IL17C, IL17RA, IL18, IL1B, IL1RN, IL6, IRF6, ITGB2, LCAT, LEP, LTB, MIF, MMP12, MMP9, NDRG1, NFKBIZ, NINJ1, NLRP3, NOS1, PDCD1, PLTP, PRCP, PRDM1, PRKCQ, PTK2B, RAC2, REN, RETN, S100B, SELE, SELL, SELP, SEMA3E, SOD3, STC1, T…	70		Cellular Function and Maintenance	phagocytosis	phagocytosis of blood cells	4.43e-22	ABCA1, ALOX15, ANXA1, C3, CAPG, CD14, CD44, CERK, CH25H, CLCN3, CLEC4M, CORO1A, CXCL10, CYP2S1, FCER1G, FCGR1A, FCGR2A, FCGR2B, FCGR3A/FCGR3B, FCMR, FCN1, FGR, GLRX, GSN, HCK, HGF, HMOX1, ICOS, IL1B, INPP5D, IRF8, ISG15, ITGAM, ITGB2, LCN2, LGALS3, LYN, MSR1, NOD2, PF4, PIK3CB, PLA2G5, PLAUR, PTPRC, RAC2, RAPGEF3, S100A9, SCARB1, SCN5A, SELPLG, SFTPA1, SIGLEC1, SIRPA, SPI1, SPIC, SYK, THBS1, TLR2…	65
Tissue Morphology	quantity	quantity of T lymphocytes	8.28e-34	ABCB1, Abcb1b, ADA, ADIPOQ, AGT, AHR, ANPEP, APOE, APP, ARHGDIA, ARHGDIB, ARID5A, ATM, BATF, BATF3, BAX, BCL11A, BCL2A1, BCL2L11, BCLAF1, BIRC5, Bst2, C5AR1, CAMP, CASP3, CASP8, CBFB, Ccl2, CCL21, CCL4, CCNB2, CCR4, CCR6, CCR7, CCR9, CD19, CD1D, CD244, CD247, CD27, CD274, CD3G, CD40, CD44, CD5, CD7, CD80, CD83, CD84, CD86, CD8A, CD8B, CDKN1A, CDKN1B, CHI3L1, CHST3, CIITA, CLEC10A, CMKLR1, CORO1A,…	279		Hematological System Development and Function	interaction	interaction of lymphocytes	6.75e-14	CCL21, CCL4, CCL5, CCR3, CCR7, CD2, CD209, CD22, CD28, CD4, CD40, CD44, CD6, CD69, CD80, CD86, CLEC10A, CLEC4M, Cmah, CTLA4, CXCL10, CXCL11, CXCR3, CXCR4, EZR, FASLG, FUT7, FYB, ICAM1, ICOS, IL10, IL17RA, IL18R1, ITGA4, ITGAL, ITGB2, ITK, LCK, LCP2, LFNG, LIF, MSN, NRP1, PLCB1, RGS16, RHBDD3, SELPLG, SKAP1, SPN, TGFB1, TLR2, TNC, TNFRSF8, TNFSF11, TNFSF14, TXK	56		Cellular Movement	chemotaxis	chemotaxis of cells	1.56e-30	ACKR2, ADAM17, ADORA1, AGT, AIF1, ANGPT1, ANXA1, APLN, APLNR, APOE, BDNF, BIN2, BMP4, C3, C5AR1, C5AR2, CAPG, CCL17, CCL19, CCL2, Ccl2, CCL21, CCL22, CCL3L3, CCL4, CCL5, Ccl6, Ccl9, CCND1, CCR4, CCR6, CCR7, CCR9, CD28, CD4, CD44, CD69, CD9, CDKN1A, CKLF, CLCN3, CNR1, CNR2, COL4A3, CORO1A, CSF1R, CSF2RA, CSF3R, CST3, CTSE, CX3CR1, CXADR, CXCL10, CXCL11, CXCL14, CXCL16, CXCL2, CXCL3, Cxcl3, CXCL6, …	213		Cellular Function and Maintenance	phagocytosis	phagocytosis of leukocytes	2.02e-21	ABCA1, ALOX15, ANXA1, C3, CAPG, CD14, CD44, CH25H, CLCN3, CLEC4M, CORO1A, CXCL10, CYP2S1, FCER1G, FCGR1A, FCGR2A, FCGR2B, FCGR3A/FCGR3B, FCMR, FCN1, FGR, GLRX, GSN, HCK, HGF, HMOX1, ICOS, IL1B, INPP5D, IRF8, ISG15, ITGAM, ITGB2, LCN2, LGALS3, MSR1, NOD2, PF4, PLA2G5, PLAUR, PTPRC, RAPGEF3, S100A9, SCARB1, SCN5A, SELPLG, SFTPA1, SIGLEC1, SIRPA, SPI1, SPIC, SYK, THBS1, TLR2, TLR3, TLR4, TNF, TREM1,…	61
Tissue Morphology	quantity	quantity of phagocytes	7.58e-32	ABCA1, ADA, ADAM17, ADAMTS12, ADIPOQ, AGT, AHR, APOE, ARNTL, B4GALT1, BATF3, BCL11A, BCL2A1, BCL2L11, BCL3, BID, BIRC3, C3, C4A/C4B, C5AR1, C5AR2, CAMP, CCL2, Ccl2, CCL20, CCL21, CCL22, CCL3L3, Ccl7, Ccl9, CCR3, CCR4, CCR6, CCR7, CD19, CD1D, CD200R1, CD300A, CD40, CD83, CDKN1A, CERK, CES1, CFH, CIITA, CLEC11A, CLEC4D, CLEC4E, CLEC7A, CMKLR1, CNR2, CSF1R, CSF3R, CTSS, CTSV, CX3CR1, CXCL10, CXCL13,…	222		Hematological System Development and Function	abnormal morphology	abnormal morphology of T lymphocytes	1.69e-14	ABCB1, Abcb1b, B2M, BAX, BCL11B, CCDC86, CCR6, CCR9, CD247, CD28, CD3E, CD4, CD5, CD5L, CD8A, CD8B, CDKN1A, CTLA4, CYTIP, DCK, E2F1, EBI3, FASLG, FCER1G, FCGR2B, GRAP2, HLA-G, IL18, IL1RN, IL21, IL2RB, IL2RG, IL6, IRF1, ITK, JAK3, LAT, LCK, LCP2, LGALS3, LY9, NFKBIZ, PRKCH, PRKCQ, PSMB10, PSMB9, PTPN22, PTPRC, RASGRP1, RCAN2, RHOH, RUNX3, SASH3, SERPINB9, SH2D1A, SLA, SPI1, TBX21, TNF, TNFSF14, T…	63		Cellular Movement	chemotaxis	chemotaxis	8.52e-30	ACKR2, ADAM17, ADORA1, AGT, AIF1, ANGPT1, ANXA1, APLN, APLNR, APOE, BDNF, BIN2, BMP4, C3, C5AR1, C5AR2, CAPG, CCL17, CCL19, CCL2, Ccl2, CCL21, CCL22, CCL3L3, CCL4, CCL5, Ccl6, Ccl9, CCND1, CCR4, CCR6, CCR7, CCR9, CD28, CD4, CD44, CD69, CD9, CDKN1A, CKLF, CLCN3, CNR1, CNR2, COL4A3, CORO1A, CSF1R, CSF2RA, CSF3R, CST3, CTSE, CX3CR1, CXADR, CXCL10, CXCL11, CXCL14, CXCL16, CXCL2, CXCL3, Cxcl3, CXCL6, …	217		Cellular Function and Maintenance	phagocytosis	phagocytosis of myeloid cells	3.37e-21	ABCA1, ALOX15, ANXA1, C3, CAPG, CD14, CD44, CH25H, CLCN3, CLEC4M, CORO1A, CXCL10, CYP2S1, FCER1G, FCGR1A, FCGR2A, FCGR2B, FCGR3A/FCGR3B, FCMR, FCN1, FGR, GLRX, GSN, HCK, HGF, HMOX1, IL1B, INPP5D, IRF8, ISG15, ITGAM, ITGB2, LCN2, LGALS3, NOD2, PF4, PLA2G5, PLAUR, PTPRC, RAPGEF3, S100A9, SCARB1, SCN5A, SELPLG, SFTPA1, SIGLEC1, SIRPA, SPI1, SPIC, SYK, THBS1, TLR2, TLR3, TLR4, TNF, TREM1, TRPV2, VAV1…	59
Tissue Morphology	quantity	quantity of granulocytes	7.65e-31	ADA, ADAM17, ADAMTS12, ADIPOQ, AHR, ARHGDIA, ARHGDIB, ARNTL, B4GALT1, BCL2L11, BID, C3, C4A/C4B, C5AR1, C5AR2, CAMP, Ccl2, CCL2, CCL22, CCL24, CCL3L3, CCR3, CCR4, CCR6, CD101, CD19, CD1D, CD200R1, CD22, CD300A, CD34, CD40, CD8A, CD97, CDKN1A, CEBPE, CERK, CFH, CLEC11A, CLEC4E, CLEC7A, CMKLR1, CNR2, CSF1R, CSF2RB, CSF3R, CTSE, CXCL6, CXCR2, CYBB, CYP1A1, DCN, DIAPH1, DOK1, DOK2, E2F4, ESR2, F2RL1,…	176		Hematological System Development and Function	aggregation	aggregation of blood cells	1.31e-13	ACTB, ACTG1, ADIPOQ, AKR1B1, ALOX12, ANXA7, BTK, C1QTNF1, C3, C4BPA, CCL17, CCL22, CCL5, CD209, Cd24a, CD4, CD40, CD44, CD63, CD9, CDH1, CES1, CLIC1, CLNS1A, CXCL10, CXCR3, DAB2, EPHB1, F2R, FCER1G, FCGR2A, FERMT3, FGF4, GATA1, GNA13, GNAZ, GSN, GUCY1A3, HBB, HCLS1, HDC, HIF1A, HSPB1, HTR2A, ICAM1, IL6, INPP5D, ITGAL, ITGB2, JAK2, LAT, LCK, LCP2, LEP, LGALS1, LYN, MET, METAP1, MYL9, NRP1, P2RX1, …	108		Cellular Movement	chemotaxis	chemotaxis of leukocytes	4.53e-27	ACKR2, ADAM17, ADORA1, AIF1, ANGPT1, ANXA1, APOE, C3, C5AR1, C5AR2, CAPG, CCL17, CCL19, Ccl2, CCL2, CCL21, CCL22, CCL3L3, CCL4, CCL5, CCND1, CCR4, CCR6, CCR7, CD28, CD4, CD69, CD9, CDKN1A, CKLF, CORO1A, CSF1R, CSF2RA, CSF3R, CST3, CTSE, CX3CR1, CXADR, CXCL10, CXCL11, CXCL14, CXCL16, CXCL2, CXCL3, Cxcl3, CXCL6, Cxcl9, CXCR1, CXCR3, CXCR4, CYBB, CYSLTR1, EDNRA, EDNRB, ELN, F2R, F2RL1, FASLG, FCER1G…	152		Cellular Function and Maintenance	phagocytosis	phagocytosis of phagocytes	7.71e-20	ABCA1, ALOX15, ANXA1, C3, CAPG, CD14, CD44, CH25H, CLCN3, CLEC4M, CORO1A, CXCL10, CYP2S1, FCER1G, FCGR1A, FCGR2A, FCGR2B, FCGR3A/FCGR3B, FCN1, FGR, GLRX, GSN, HCK, HGF, HMOX1, ICOS, IL1B, INPP5D, ISG15, ITGAM, ITGB2, LCN2, LGALS3, NOD2, PF4, PLA2G5, PLAUR, PTPRC, RAPGEF3, S100A9, SCARB1, SCN5A, SELPLG, SFTPA1, SIGLEC1, SIRPA, SPI1, SPIC, SYK, THBS1, TLR2, TLR3, TLR4, TNF, TRPV2, VAV1, WAS	57
Tissue Morphology	quantity	quantity of neutrophils	3.42e-23	ADA, ADAM17, ADAMTS12, ADIPOQ, AHR, ARNTL, B4GALT1, C3, C4A/C4B, C5AR1, C5AR2, CAMP, Ccl2, CCL2, CCL3L3, CCR4, CD19, CD1D, CD300A, CD40, CERK, CFH, CLEC4E, CLEC7A, CMKLR1, CNR2, CSF3R, CXCR2, CYBB, CYP1A1, DCN, DIAPH1, DOK1, DOK2, ESR2, F2RL1, FAS, FCGR1A, FCGR2A, FCGR2B, FES, FPR1, FUT4, FUT7, FZD9, GJA1, GPR132, GSN, ICAM1, IFNAR1, IL10, IL17RA, IL18, IL18BP, IL1A, IL1B, IL1R1, IL2RB, IL2RG, IL…	125		Hematological System Development and Function	formation	formation of hematopoietic progenitor cells	1.33e-13	B2M, BAX, BCL11B, BCL2L11, BIRC5, BRCA1, CBFB, CCND1, CCR9, CD3D, CD3E, CD3G, CD83, CDKN1A, CDKN1B, CDKN2A, CXCR4, DCK, DLL1, EEF1D, EGR2, F5, GATA2, GATA3, GRAP2, HIF1A, IL10, IL11, IL2RB, IL2RG, IL7R, INHBA, IRF1, IRF8, JAK2, JAK3, KIT, Klra4 (includes others), LAT, LAT2, LAX1, LCP2, LMO2, MLLT11, MYL9, NAB1, PDCD1, PIM1, PTPRC, RASGRP1, RASGRP4, RPL22, RPS19, SATB1, SIT1, SPI1, SPIB, STAT1, SY…	65		Cellular Movement	chemotaxis	chemotaxis of myeloid cells	1.02e-24	ADORA1, AIF1, ANGPT1, ANXA1, APOE, C3, C5AR1, C5AR2, CAPG, CCL17, CCL19, Ccl2, CCL2, CCL21, CCL22, CCL3L3, CCL4, CCL5, CCND1, CCR6, CCR7, CD28, CD4, CD69, CD9, CDKN1A, CKLF, CORO1A, CSF1R, CSF2RA, CSF3R, CST3, CTSE, CX3CR1, CXADR, CXCL10, CXCL14, CXCL2, CXCL3, Cxcl3, CXCL6, Cxcl9, CXCR1, CXCR3, CXCR4, CYBB, EDNRA, EDNRB, ELN, F2R, FASLG, FCER1G, FCGR2A, FGR, GRK6, GRN, GSN, HCK, HP, ICAM1, IL16, …	128		Cellular Function and Maintenance	phagocytosis	phagocytosis of antigen presenting cells	2.61e-15	ABCA1, ALOX15, ANXA1, C3, CAPG, CD14, CD44, CH25H, CLEC4M, CYP2S1, FCER1G, FCGR1A, FCGR2A, FCGR2B, FCN1, FGR, GSN, HCK, HGF, HMOX1, ICOS, IL1B, INPP5D, ISG15, ITGAM, ITGB2, LGALS3, NOD2, PLA2G5, PLAUR, PTPRC, RAPGEF3, S100A9, SCARB1, SCN5A, SFTPA1, SIGLEC1, SIRPA, SPI1, SPIC, THBS1, TLR2, TLR4, TNF, TRPV2	45
Tissue Morphology	quantity	quantity of B lymphocytes	2.58e-21	ACKR3, AHR, AICDA, APOE, APP, ARHGDIA, ARHGDIB, ARID3A, ARNTL, ATM, B3GNT5, BANK1, BAX, BCL2A1, BCL2L11, BCL3, BCLAF1, BLNK, BST1, BTK, C3, CAMP, CASP8, CCR6, CCR7, CCR9, CD180, CD19, CD22, Cd24a, CD27, CD274, CD38, CD40, CD80, CD84, CDH17, CDKN1A, CEBPB, CEBPE, Cmah, CNR2, CXCL13, CXCR2, CXCR4, DAPP1, DCK, DCLRE1C, DOCK8, ESR1, ESR2, FAS, FCER1G, FCGR1A, FCGR2A, FCGR2B, FES, FLT3, FOS, FZD9, GAD…	168		Hematological System Development and Function	formation	formation of thymocytes	5.66e-13	B2M, BAX, BCL11B, BCL2L11, BIRC5, BRCA1, CBFB, CCND1, CCR9, CD3D, CD3E, CD3G, CD83, CDKN1A, CDKN1B, CDKN2A, CXCR4, DCK, DLL1, EEF1D, EGR2, F5, GATA3, GRAP2, IL10, IL2RB, IL2RG, IL7R, IRF1, JAK3, KIT, Klra4 (includes others), LAT, LAT2, LAX1, LCP2, LMO2, MLLT11, NAB1, PDCD1, PIM1, PTPRC, RASGRP1, RASGRP4, RPL22, SATB1, SIT1, SPI1, SPIB, SYK, THEMIS2, TK1, TRAT1, TYROBP, WT1, ZAP70	56		Cellular Movement	chemotaxis	chemotaxis of phagocytes	8.86e-24	ADORA1, AIF1, ANGPT1, ANXA1, APOE, C3, C5AR1, C5AR2, CAPG, CCL17, CCL19, Ccl2, CCL2, CCL21, CCL22, CCL3L3, CCL4, CCL5, CCND1, CCR6, CCR7, CD28, CD4, CD69, CD9, CDKN1A, CKLF, CORO1A, CSF1R, CSF2RA, CSF3R, CST3, CTSE, CX3CR1, CXADR, CXCL10, CXCL14, CXCL2, CXCL3, Cxcl3, CXCL6, CXCR1, CXCR3, CXCR4, CYBB, EDNRA, EDNRB, ELN, F2R, FASLG, FCER1G, FCGR2A, FGR, GRK6, GRN, GSN, HCK, HP, HRH1, ICAM1, IL16, I…	127		Cellular Function and Maintenance	phagocytosis	phagocytosis by macrophages	7.03e-15	ABCA1, ALOX15, ANXA1, CAPG, CD14, CD44, CH25H, CLEC4M, CYP2S1, FCER1G, FCGR1A, FCGR2A, FCGR2B, FCN1, FGR, GSN, HCK, HGF, HMOX1, IL1B, INPP5D, ISG15, ITGAM, ITGB2, LGALS3, NOD2, PLA2G5, PLAUR, PTPRC, RAPGEF3, S100A9, SCARB1, SCN5A, SFTPA1, SIGLEC1, SIRPA, SPI1, SPIC, THBS1, TLR2, TLR4, TNF, TRPV2	43
[truncated: 864 more rows]
